# Supplementary material
Source: Research Square preprint supplement (doi:10.21203/rs.3.rs-9050577/v1)
Supplement: Supplementary file 1 [file 1b4bde4c85a309898e892470.pdf]

## Supplementary Information

### **Metal-Free Stereoretentive Click Coupling of Chiral Metallocenes in Water**

Peng Chen,<sup>1</sup> Chao Yang,<sup>1</sup> Minnan Huang,<sup>4</sup> Lei Wang,<sup>1</sup> Xuefei Zhao,<sup>4\*</sup> Zhenhua Jia,<sup>1,3\*</sup> and Teck-Peng Loh<sup>1,2\*</sup>

<sup>1</sup>*Henan Linker Technology Key Laboratory, College of Advanced Interdisciplinary Science and Technology (CAIST), Henan University of Technology, Zhengzhou, 450001, China*

<sup>2</sup>*Division of Chemistry and Biological Chemistry, School of Chemistry Chemical Engineering, and Biotechnology, Nanyang Technological University, Singapore, 637371, Singapore*

<sup>3</sup>*Department of Chemistry, Fudan University, Shanghai, 200433, China*

<sup>4</sup>*School of Chemistry and Molecular Engineering, Nanjing Tech University, Nanjing 211816, China*

\*E-mail: xfzhao@njtech.edu.cn; zhenhua\_jia@fudan.edu.cn; teckpeng@ntu.edu.sg

This PDF file includes:

Materials and Methods

Supplementary Text

Spectral Data

References

## Table of contents

|                                                                                                       |      |
|-------------------------------------------------------------------------------------------------------|------|
| 1. General Information .....                                                                          | S2   |
| 2. Starting materials.....                                                                            | S3   |
| 3. Optimization of Reaction Conditions .....                                                          | S14  |
| 4. Experimental Section.....                                                                          | S17  |
| 5. Mechanistic Study .....                                                                            | S21  |
| 6. X-ray Crystallographic Data.....                                                                   | S46  |
| 7. Characterization Data of Products.....                                                             | S54  |
| 8. Summary of Chiral HPLC analysis Spectra .....                                                      | S93  |
| 9. $^1\text{H}$ , $^{13}\text{C}$ , $^{19}\text{F}$ and $^{31}\text{P}$ NMR Spectra of Products ..... | S176 |
| 10. References .....                                                                                  | S274 |

## 1. General Information

Materials and instruments: All reactions were carried out without exclusion of air or moisture. Chemicals were purchased from commercial suppliers and used without further purification. Metallocenes, alcohols, sulfonamides, indoles, heterocyclics and natural complexes were purchased from commercial suppliers and used directly as received. Flash column chromatographic purification of products was accomplished using forced-flow chromatography on Silica Gel (200–300 mesh). Preparative thin-layer chromatography (PTLC) was performed on glass plates (20 x 20 cm) impregnated with silica gel 60 F254 (0.3–0.4 mm thickness).

NMR spectra were recorded on a JEOL/JNM-ECZL400S NMR spectrometer (400 MHz for  $^1\text{H}$ , 101 MHz for  $^{13}\text{C}$ , 376 MHz for  $^{19}\text{F}$ , 160 MHz for  $^{31}\text{P}$ ). Chemical shifts of  $^1\text{H}$  NMR and  $^{13}\text{C}$  NMR spectra were reported as parts per million in  $\delta$  scale using residual solvent signal as internal standard (note:  $\text{CDCl}_3$  referenced at  $\delta$  7.26 in  $^1\text{H}$  and  $\delta$  77.0 for central line of the triplet in  $^{13}\text{C}$ ). Data are represented as follows: chemical shift, integration, multiplicity (s = singlet, d = doublet, t = triplet, q = quartet, m = multiplet, br = broad) and coupling constant ( $J$ , Hz). High resolution mass spectra (HRMS) were obtained on a 3000-mass spectrometer, using Waters Q-ToF MS/MS system with the ESI technique. X-ray diffraction analysis of single crystals was performed on Bruker APEX II X-ray single crystal diffraction meter. Enantiomeric excesses were determined by HPLC analysis using chiral column described below in detail.

## 2. Starting materials

### A. (S)-Metalloocene alcohols

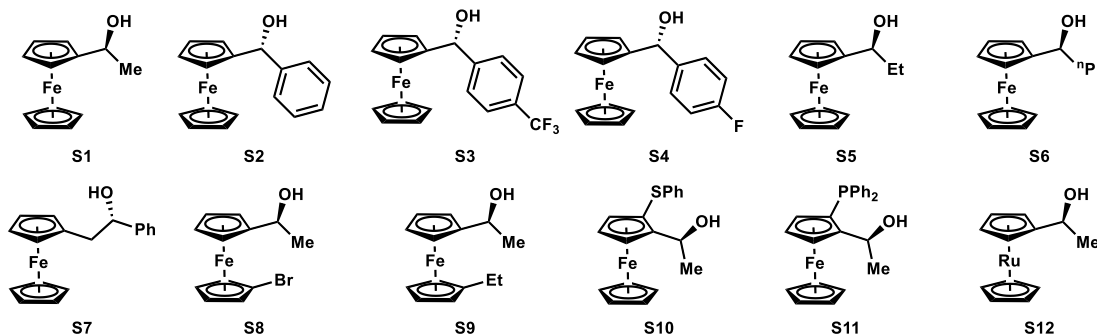

### B. Benzyl alcohols and thiols

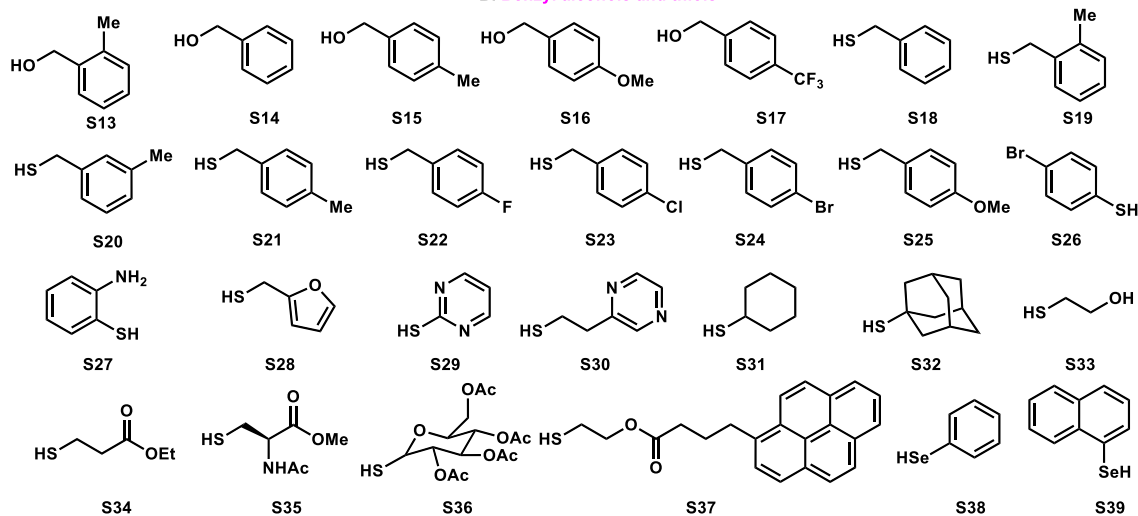

### C. Sulfamides and amides

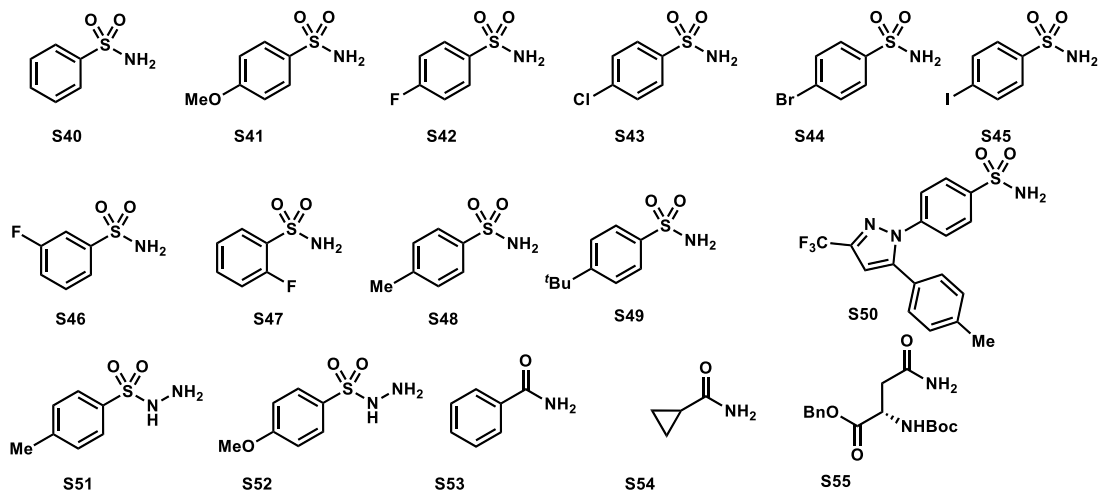

### D. Indoles

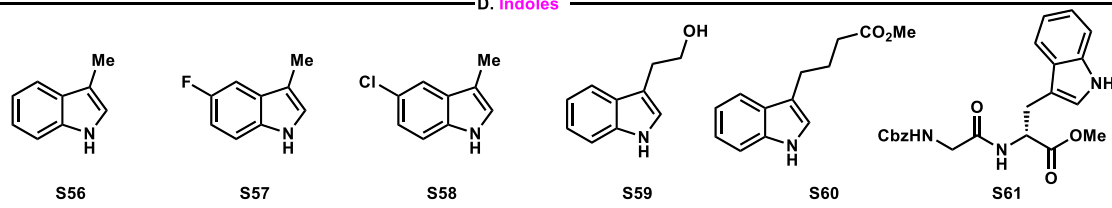

---

E. Other nucleophiles

---

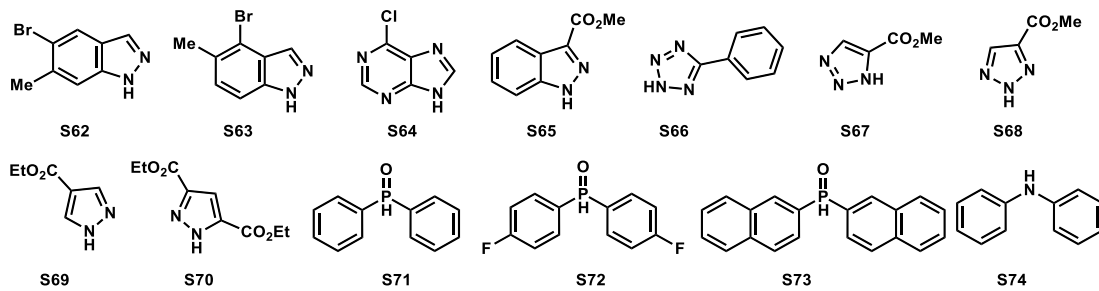

Compounds **S1**, **S13–S36**, **S38**, **S40–S60** and **S62–S74** were commercially available. Compound **S10**<sup>1</sup>, **S11**<sup>1</sup>, **S37**<sup>2</sup>, **S39**<sup>3</sup>, and **S61**<sup>4</sup> were prepared in accordance with those previously reported in the literature. The spectral data are in full accordance with the literature report respectively.

## 2.1 Syntheses of compounds S2–S4

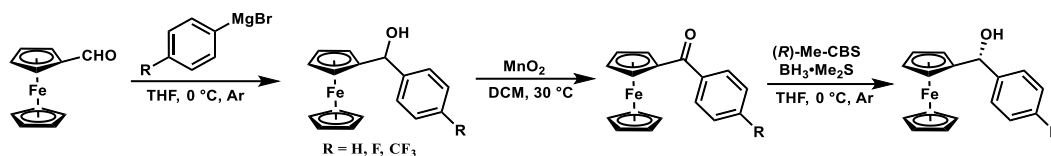

To an oven-dried 50 mL round bottom flask equipped with a stir was charged with ferrocene formaldehyde (10.0 mmol, 2.14 g) under argon atmosphere. Then, anhydrous THF (20.0 mL) was added *via* syringe. The reaction mixture was stirred at 0 °C, a solution of aryl magnesium bromide (15 mmol, 1.0 M in THF, 1.5 equiv.) was added slowly *via* syringe, and the mixture was stirred for 2 h at 0 °C. Upon completion, the reaction was quenched with saturated aqueous NH<sub>4</sub>Cl solution, extracted with EtOAc (3 × 50 mL), dried over Na<sub>2</sub>SO<sub>4</sub>, filtered, concentrated under reduced pressure. The residue was purified by flash column chromatography (petroleum ether/ethyl acetate) to afford the corresponding ferrocene alcohol products.

To an oven-dried 50 mL round bottom flask equipped with a stir was charged with ferrocene alcohol (5 mmol, 1.0 equiv.) in anhydrous DCM (20.0 mL), activated MnO<sub>2</sub> (50 mmol, 4.35 g) was added and the reaction was allowed to stirred at room temperature for overnight. Upon completion, the mixture was filtered through a Büchner funnel to remove manganese dioxide, followed by concentration of the filtrate under reduced pressure. The residue was purified by silica gel flash chromatography (petroleum ether/Ethyl acetate = 10:1) to afford the corresponding ferrocene ketones.

To an oven-dried 50 mL round bottom flask equipped with a stir was charged with ferrocene ketone (5.0 mmol, 1.0 equiv.) in anhydrous THF (20.0 mL), (R)-Me-CBS (2.0 mmol, 0.4 equiv.) and BH<sub>3</sub>·Me<sub>2</sub>S (3.0 equiv.) were added slowly *via* syringe at 0 °C. Then, the reaction mixture was stirred at 0 °C for 30 min and was allowed to stirred at room temperature for overnight. Upon completion, MeOH was added slowly to quench the reaction, and extracted three times with EtOAc, dry with anhydrous Na<sub>2</sub>SO<sub>4</sub>, and concentrated under reduced pressure. The residue was purified by flash column chromatography to obtain products **S2–S4**. The products **S2** and **S3** exhibited improved enantioselectivity following recrystallization.

For example, the synthesis of compound **S2**. To an oven-dried 50 mL round bottom flask equipped with a stir was charged with ferrocene formaldehyde (10.0 mmol, 2.14 g) under argon atmosphere. Then, anhydrous THF (20.0 mL) was added *via* syringe. The reaction mixture was stirred at 0 °C, a solution of phenyl magnesium bromide (15 mmol, 1.0 M in THF, 1.5 equiv.) was added slowly *via* syringe, and the mixture was stirred for 2 h at 0 °C. Upon completion, the reaction was quenched with saturated aqueous NH<sub>4</sub>Cl solution, extracted with EtOAc (3 × 50 mL), dried over Na<sub>2</sub>SO<sub>4</sub>, filtered, concentrated under reduced pressure. The residue was purified by flash column chromatography (petroleum ether/Ethyl acetate = 10/1) to afford ferrocenyl-(phenyl)methanol (2.4 g, 81% yield).

To an oven-dried 50 mL round bottom flask equipped with a stir was charged with ferrocenyl-(phenyl)methanol (5 mmol, 1.46 g) in anhydrous DCM (20.0 mL), activated MnO<sub>2</sub> (50 mmol, 4.35 g) was added and the reaction was allowed to stirred at room temperature for overnight. Upon completion, the mixture was filtered through a Büchner funnel to remove manganese dioxide, followed by concentration of the filtrate under reduced pressure. The residue was purified by silica gel flash chromatography (petroleum ether/Ethyl acetate = 10:1) to afford the ferrocenyl-(phenyl)methanone (1.4 g, 95% yield).

To an oven-dried 50 mL round bottom flask equipped with a stir was charged with ferrocenyl-(phenyl)methanone (4.0 mmol, 1.2 g, 1.0 equiv.) in anhydrous THF (20.0 mL), (*R*)-Me-CBS (1.6 mmol, 443 mg, 0.4 equiv.) and BH<sub>3</sub>•Me<sub>2</sub>S (12 mmol, 6 mL, 2 M in THF, 3.0 equiv.) were added slowly *via* syringe at 0 °C. Then, the reaction mixture was stirred at 0 °C for 30 min and was allowed to stirred at room temperature for overnight. Upon completion, MeOH was added slowly to quench the reaction, and extracted three times with EtOAc, dry with anhydrous Na<sub>2</sub>SO<sub>4</sub>, and concentrated under reduced pressure. The residue was purified by flash column chromatography to obtain product (*S*)-**S2** (1.05 g, 90% yield). The product **S2** exhibited improved enantioselectivity following recrystallization. The ee value was determined by HPLC. **TLC**: R<sub>f</sub> = 0.35 (petroleum ether/Ethyl acetate = 8/1); 1.05 g, yield: 90%; yellow solid.

$^1\text{H NMR}$  (400 MHz,  $\text{CDCl}_3$ )  $\delta$  7.40 – 7.37 (m, 2H), 7.34 – 7.30 (m, 2H), 7.27 – 7.22 (m, 1H), 5.46 (d,  $J = 3.2$  Hz, 1H), 4.23 – 4.16 (m, 9H), 2.46 (d,  $J = 3.2$  Hz, 1H).

$^{13}\text{C NMR}$  (101 MHz,  $\text{CDCl}_3$ )  $\delta$  143.2, 128.2, 127.4, 126.2, 94.3, 72.0, 68.5, 68.2, 68.1, 67.4, 65.9.

**HRMS** (ESI-TOF)  $m/z$ :  $[\text{M}+\text{K}]^+$  Calcd for  $\text{C}_{17}\text{H}_{16}\text{FeOK}$  331.0177; Found: 331.0189.

**Chiral HPLC**: The ee value was 93%,  $t_R$  (minor) = 12.2 min,  $t_S$  (major) = 16.7 min (Chiralpak IA,  $\lambda = 254$  nm, 10% isopropanol/hexanes, flow rate = 1.0 mL/min).

Data was in accordance with that reported in the literature.<sup>5</sup>

## 2.2 Syntheses of compounds S5–S6

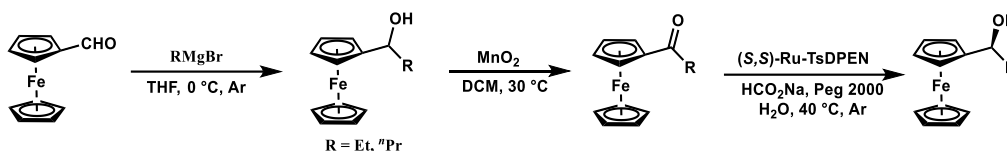

To an oven-dried 50 mL round bottom flask equipped with a stir was charged with ferrocene formaldehyde (10.0 mmol, 2.14 g) under argon atmosphere. Then, anhydrous THF (20.0 mL) was added *via* syringe. The reaction mixture was stirred at  $0\text{ }^\circ\text{C}$ , a solution of alkyl magnesium bromide (15 mmol, 1.5 equiv.) was added slowly *via* syringe, and the mixture was stirred for 2 h at  $0\text{ }^\circ\text{C}$ . Upon completion, the reaction was quenched with saturated aqueous  $\text{NH}_4\text{Cl}$  solution, extracted with EtOAc ( $3 \times 50$  mL), dried over  $\text{Na}_2\text{SO}_4$ , filtered, concentrated under reduced pressure. The residue was purified by flash column chromatography (petroleum ether/ethyl acetate) to afford the corresponding ferrocene alcohol products.

To an oven-dried 50 mL round bottom flask equipped with a stir was charged with ferrocene alcohols (5 mmol, 1.0 equiv.) in anhydrous DCM (20.0 mL), activated  $\text{MnO}_2$  (50 mmol, 4.35 g) was added and the reaction was allowed to stirred at room temperature for overnight. Upon completion, the mixture was filtered through a Büchner funnel to remove manganese dioxide, followed by concentration of the filtrate under reduced pressure. The residue was purified by silica gel flash chromatography (petroleum ether/Ethyl acetate = 10:1) to afford the corresponding ferrocene ketones.

To an oven-dried 5.0 mL vial equipped with a stir was charged with [(*S,S*)-*N*-(2-Amino-1,2-diphenylethyl)-*p*-toluenesulfonamide]chloro(mesitylene)ruthenium(II) (0.01

equiv.) in H<sub>2</sub>O (1.0 mL), acetyl ferrocene ketones (1.0 mmol), sodium formate (5.0 mmol, 0.34 g) and PEG2000 (1.0 g) were added under argon atmosphere. Then, the reaction mixture was allowed to stirred at 40 °C for 24 h. Upon completion, Et<sub>2</sub>O (10.0 mL) was added slowly to quench the reaction, and extracted three times with EtOAc, dry with anhydrous Na<sub>2</sub>SO<sub>4</sub>, and concentrated under reduced pressure. The residue was purified by flash column on silica (petroleum ether/Ethyl acetate = 10:1) to afford the product and the ee value was determined by HPLC analysis.

For example, the synthesis of compound (*S*)-**S5**. To an oven-dried 50 mL round bottom flask equipped with a stir was charged with ferrocene formaldehyde (10.0 mmol, 2.14 g) under argon atmosphere. Then, anhydrous THF (20.0 mL) was added *via* syringe. The reaction mixture was stirred at 0 °C, a solution of ethyl magnesium bromide (15 mmol, 15 mL, 1.0 M in THF) was added slowly, and the mixture was stirred for 2 h at 0 °C. Upon completion, the reaction was quenched with saturated aqueous NH<sub>4</sub>Cl solution, extracted with EtOAc (3 × 50 mL), dried over Na<sub>2</sub>SO<sub>4</sub>, filtered, concentrated under reduced pressure. The residue was purified by flash column chromatography (petroleum ether/Ethyl acetate = 10/1) to afford 1-ferrocenylpropan-1-ol (2.07 g, 85% yield).

To an oven-dried 50 mL round bottom flask equipped with a stir was charged with 1-ferrocenylpropan-1-ol (5 mmol, 1.22 g) in anhydrous DCM (20.0 mL), activated MnO<sub>2</sub> (50 mmol, 4.35 g) was added and the reaction was allowed to stirred at room temperature for overnight. Upon completion, the mixture was filtered through a Büchner funnel to remove manganese dioxide, followed by concentration of the filtrate under reduced pressure. The residue was purified by silica gel flash chromatography (petroleum ether/Ethyl acetate = 10/1) to afford the ferrocenylpropenone (1.1 g, 91% yield).

To an oven-dried 5.0 mL vial equipped with a stir was charged with [(*S,S*)-N-(2-Amino-1,2-diphenylethyl)-*p*-toluenesulfonamide]chloro(mesitylene)ruthenium(II) (0.01 mmol, 6 mg) in H<sub>2</sub>O (1.0 mL), ferrocenylpropenone (1.0 mmol, 242 mg), sodium formate (5.0 mmol, 0.34 g) and PEG2000 (1.0 g) were added under argon atmosphere. Then, the reaction mixture was allowed to stirred at 40 °C for 24 h. Upon completion, Et<sub>2</sub>O (10.0

mL) was added slowly to quench the reaction, and extracted three times with EtOAc, dry with anhydrous Na<sub>2</sub>SO<sub>4</sub>, and concentrated under reduced pressure. The residue was purified by flash column on silica (petroleum ether/Ethyl acetate = 10:1) to afford the product **S5** (75 mg, 30% yield) and the ee value was determined by HPLC analysis.

**TLC:** R<sub>f</sub> = 0.47 (petroleum ether/Ethyl acetate = 8:1); 75 mg, yield: 30%; yellow oil.

**<sup>1</sup>H NMR** (400 MHz, CDCl<sub>3</sub>) δ 4.25 – 4.23 (m, 1H), 4.20 (s, 5H), 4.19 – 4.17 (m, 1H), 4.16 – 4.15 (m, 2H), 1.94 (d, *J* = 3.4 Hz, 1H), 1.73 – 1.64 (m, 2H), 0.95 (t, *J* = 7.4 Hz, 3H).

**<sup>13</sup>C NMR** (101 MHz, CDCl<sub>3</sub>) δ 94.3, 71.1, 68.2, 67.8, 67.7, 67.3, 65.1, 31.0, 10.3.

**HRMS** (ESI-TOF) *m/z*: [M+Na]<sup>+</sup> Calcd for C<sub>13</sub>H<sub>16</sub>FeONa 267.0437; Found: 267.0443.

**Chiral HPLC:** The ee value was 98%, *t*<sub>R</sub> (minor) = 9.2 min, *t*<sub>S</sub> (major) = 14.1 min (Chiralpak IA, λ = 254 nm, 10% isopropanol/hexanes, flow rate = 1.0 mL/min).

### 2.3 Synthesis of compound **S7**

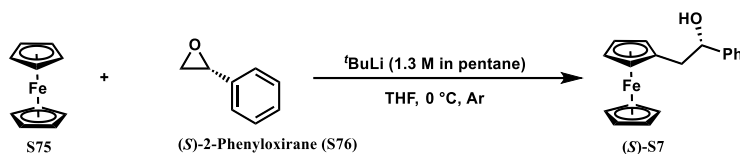

To a solution of *t*-butyllithium (9.2 mmol, 7.0 mL, 1.3 M in pentane) was added dropwise a solution of ferrocene **S75** (10.7 mmol, 2.0 g) in anhydrous THF (20 mL) under argon atmosphere at 0 °C. The reaction was stirred for 0.5 h, then 0.85 mL of (*S*)-styrene oxide **S76** (7.1 mmol) was added rapidly. The mixture was allowed to warm to room temperature and then stirred for 1 h. Upon completion, the reaction was quenched with saturated aqueous NH<sub>4</sub>Cl solution, extracted with EtOAc (3 × 50 mL), dried over Na<sub>2</sub>SO<sub>4</sub>, filtered, concentrated under reduced pressure. The residue was purified by flash column chromatography (petroleum ether/Ethyl acetate = 4/1) to afford the product (*S*)-**S7** (400 mg, 12% yield), yellow solid. The ee value was determined by HPLC.

**<sup>1</sup>H NMR** (400 MHz, CDCl<sub>3</sub>) δ 7.39 – 7.33 (m, 4H), 7.32 – 7.27 (m, 1H), 4.68 (dd, *J* = 8.2, 4.9 Hz, 1H), 4.17 – 4.07 (m, 8H), 4.07 (s, 1H), 2.82 – 2.71 (m, 2H), 2.36 (s, 1H).

**<sup>13</sup>C NMR** (101 MHz, CDCl<sub>3</sub>) δ 144.0, 128.2, 127.4, 125.7, 84.2, 75.0, 69.3, 68.8, 68.6, 67.9, 67.8, 40.2.

**HRMS** (ESI-TOF)  $m/z$ :  $[M]^+$  Calcd for  $C_{18}H_{18}FeO$  306.0701; Found: 306.0703.

**Chiral HPLC**: The ee value was 97%,  $t_S$  (major) = 9.8 min,  $t_R$  (minor) = 10.6 min (Chiralpak IF,  $\lambda$  = 254 nm, 10% isopropanol/hexanes, flow rate = 1.0 mL/min).

## 2.4 Synthesis of compound S8

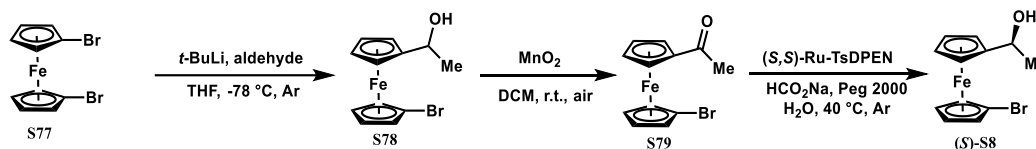

To a solution of *t*-butyllithium (3.3 mmol, 2.5 mL, 1.3 M in pentane) was added dropwise a solution of 1-1'-dibromoferrocene **S77** (3 mmol, 1.03 g) in anhydrous THF (20 mL) under argon atmosphere at -78 °C. The reaction was stirred for 0.5 h, then a solution of acetaldehyde (4.5 mmol, 0.25 mL) was added dropwise. The mixture was stirred at -78 °C for 4 h. Upon completion, the reaction was quenched with saturated aqueous  $NH_4Cl$  solution, extracted with EtOAc ( $3 \times 50$  mL), dried over  $Na_2SO_4$ , filtered, concentrated under reduced pressure. The residue was purified by flash column chromatography (petroleum ether/Ethyl acetate = 10/1) to afford the product **S78** (497 mg, 54% yield).

To an oven-dried 50 mL round bottom flask equipped with a stir was charged with **S78** (1.6 mmol, 497 mg) in anhydrous DCM (10.0 mL), activated  $MnO_2$  (16 mmol, 1.39 g) was added and the reaction was allowed to stirred at room temperature for overnight. Upon completion, the mixture was filtered through a Büchner funnel to remove manganese dioxide, followed by concentration of the filtrate under reduced pressure. The residue was purified by silica gel flash chromatography (petroleum ether/Ethyl acetate = 10/1) to afford **S79** (463 mg, 96% yield).

To an oven-dried 5.0 mL vial equipped with a stir was charged with [(*S,S*)-*N*-(2-Amino-1,2-diphenylethyl)-*p*-toluenesulfonamide]chloro(mesitylene)ruthenium(II) (0.01 mmol, 6 mg) in  $H_2O$  (1.0 mL), **S79** (1.0 mmol, 307 mg), sodium formate (5.0 mmol, 0.34 g) and PEG2000 (1.0 g) were added under argon atmosphere. Then, the reaction mixture was allowed to stirred at 40 °C for 24 h. Upon completion,  $Et_2O$  (10.0 mL) was added slowly to quench the reaction, and extracted three times with EtOAc, dry with anhydrous  $Na_2SO_4$ , and concentrated under reduced pressure. The residue was purified

by flash column on silica (petroleum ether/Ethyl acetate = 10:1) to afford the product (*S*)-**S8** (113 mg, 37% yield) and the ee value was determined by HPLC analysis.

**TLC:**  $R_f = 0.41$  (petroleum ether/Ethyl acetate = 8/1); 113 mg, yield: 37%; yellow oil.

**$^1\text{H}$  NMR** (400 MHz,  $\text{CDCl}_3$ )  $\delta$  4.68 – 4.63 (m, 1H), 4.43 – 4.40 (m, 2H), 4.26 – 4.24 (m, 1H), 4.23 – 4.19 (m, 3H), 4.13 – 4.12 (m, 2H), 1.94 (d,  $J = 4.3$  Hz, 1H), 1.46 – 1.44 (m, 3H).

**$^{13}\text{C}$  NMR** (101 MHz,  $\text{CDCl}_3$ )  $\delta$  96.2, 77.8, 70.5, 70.5, 70.4, 70.4, 68.5, 68.4, 67.4, 65.3, 24.1.

**HRMS** (ESI-TOF)  $m/z$ :  $[\text{M}+\text{H}]^+$  Calcd for  $\text{C}_{12}\text{H}_{14}\text{BrFeO}$  308.9566; Found: 308.9550.

**Chiral HPLC:** The ee value was 96%,  $t_S$  (major) = 6.5 min,  $t_R$  (minor) = 7.1 min (Chiralpak IC,  $\lambda = 254$  nm, 10% isopropanol/hexanes, flow rate = 1.0 mL/min).

## 2.5 Synthesis of compound **S9**

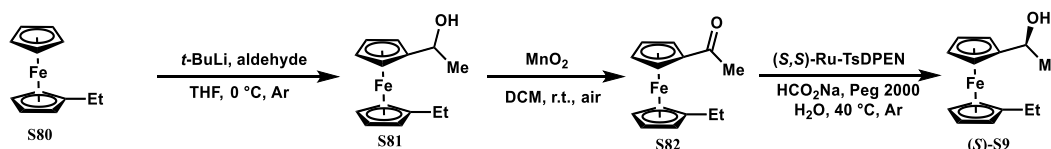

To a solution of *t*-butyllithium (3.3 mmol, 2.5 mL, 1.3 M in pentane) was added dropwise a solution of ethylferrocene **S80** (3 mmol, 642 mg) in anhydrous THF (10 mL) under argon atmosphere at 0 °C. The reaction was stirred for 0.5 h, then a solution of acetaldehyde (4.5 mmol, 0.25 mL) was added dropwise and stirred at 0 °C for 4 h. Upon completion, the reaction was quenched with saturated aqueous  $\text{NH}_4\text{Cl}$  solution, extracted with EtOAc ( $3 \times 50$  mL), dried over  $\text{Na}_2\text{SO}_4$ , filtered, concentrated under reduced pressure. The residue was purified by flash column chromatography (petroleum ether/Ethyl acetate = 10/1) to afford the product **S81** (317 mg, 41% yield). To an oven-dried 50 mL round bottom flask equipped with a stir was charged with **S81** (1.2 mmol, 317 mg) in anhydrous DCM (10.0 mL), activated  $\text{MnO}_2$  (12 mmol, 1.04 g) was added and the reaction was allowed to stirred at room temperature for overnight. Upon completion, the mixture was filtered through a Büchner funnel to remove manganese dioxide, followed by concentration of the filtrate under reduced pressure. The residue was purified by silica gel flash chromatography (petroleum ether/Ethyl acetate = 10/1) to afford **S82** (291 mg, 95% yield).

To an oven-dried 5.0 mL vial equipped with a stir was charged with [(*S,S*)-*N*-(2-Amino-1,2-diphenylethyl)-*p*-toluenesulfonamide]chloro(mesitylene)ruthenium(II) (0.01 mmol, 6 mg) in H<sub>2</sub>O (1.0 mL), **S82** (1.0 mmol, 258 mg), sodium formate (5.0 mmol, 0.34 g) and PEG2000 (1.0 g) were added under argon atmosphere. Then, the reaction mixture was allowed to stirred at 40 °C for 24 h. Upon completion, Et<sub>2</sub>O (10.0 mL) was added slowly to quench the reaction, and extracted three times with EtOAc, dry with anhydrous Na<sub>2</sub>SO<sub>4</sub>, and concentrated under reduced pressure. The residue was purified by flash column on silica (petroleum ether/Ethyl acetate = 10:1) to afford the product (*S*)-**S8** (*S*)-**S9** (175 mg, 67% yield) and the ee value was determined by HPLC analysis.

**TLC:**  $R_f$  = 0.45 (petroleum ether/Ethyl acetate=8/1); 175 mg, yield: 67%; yellow oil.

**<sup>1</sup>H NMR** (400 MHz, CDCl<sub>3</sub>) δ 4.57 – 4.48 (m, 1H), 4.17 – 4.08 (m, 8H), 2.36 – 2.29 (m, 2H), 1.43 (dd,  $J$  = 6.5, 4.8 Hz, 3H), 1.16 (t,  $J$  = 7.5 Hz, 3H).

**<sup>13</sup>C NMR** (101 MHz, CDCl<sub>3</sub>) δ 95.0, 92.0, 69.1, 68.9, 68.9, 68.1, 68.1, 67.5, 66.8, 66.8, 65.4, 29.3 23.5, 22.0, 14.7.

**HRMS** (ESI-TOF)  $m/z$ : [M+Na]<sup>+</sup> Calcd for C<sub>14</sub>H<sub>18</sub>FeONa 281.0593; Found: 281.0601.

**Chiral HPLC:** The ee value was 98%,  $t_s$  (major) = 13.8 min,  $t_R$  (minor) = 16.7 min (Chiralpak IC, λ = 254 nm, 3% isopropanol/hexanes, flow rate = 0.8 mL/min).

## 2.6 Synthesis of compound S12

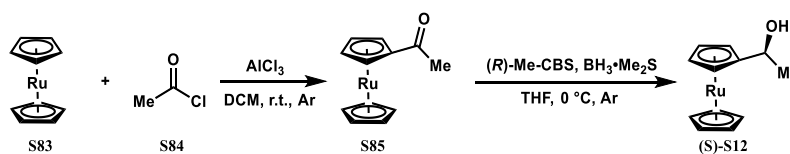

In an argon-filled glovebox, to a 25 mL pressure-resistant sealed tube equipped with a stir was charged with aluminum trichloride (3.0 mmol, 402 mg) and ruthenocene **S83** (3.0 mmol, 693 mg) in DCM (10 mL), acetyl chloride **S84** (6.0 mmol, 471 mg) was added. The resulting solution was sealed, removed from the nitrogen filled dry box and the reaction mixture was allowed to stirred at 40 °C for 6 h. Upon completion, Et<sub>2</sub>O (10.0 mL) was added slowly to quench the reaction and concentrated under reduced pressure. The residue was purified by flash column on silica (petroleum ether/Ethyl acetate = 10:1) to afford the product acetyl ruthenocene **S85** (274 mg, 33%).

To an oven-dried 50 mL round bottom flask equipped with a stir was charged with acetyl ruthenocene **S85** (1.3 mmol, 274 mg) in anhydrous THF (10.0 mL), (*R*)-Me-CBS (0.52 mmol, 144 mg) and BH<sub>3</sub>•Me<sub>2</sub>S (3.9 mmol, 1.45 mL, 2 M in THF) were added slowly *via* syringe at 0 °C. Then, the reaction mixture was stirred at 0 °C for 30 min and was allowed to stirred at room temperature for overnight. Upon completion, MeOH was added slowly to quench the reaction, and extracted three times with EtOAc, dry with anhydrous Na<sub>2</sub>SO<sub>4</sub>, and concentrated under reduced pressure. The residue was purified by flash column chromatography to obtain product (*S*)-**S12** (242 mg, 88%). The product **S12** exhibited improved enantioselectivity following recrystallization. The ee value was determined by HPLC.

**TLC:** R<sub>f</sub> = 0.39 (petroleum ether/Ethyl acetate = 8/1); 242 mg, yield: 88%; white solid.

**<sup>1</sup>H NMR** (400 MHz, CDCl<sub>3</sub>) δ 4.68 – 4.67 (m, 1H), 4.66 – 4.64 (m, 1H), 4.61 (s, 5H), 4.53 – 4.51 (m, 2H), 4.28 – 4.26 (m, 1H), 1.34 (d, *J* = 6.3 Hz, 3H).

**<sup>13</sup>C NMR** (101 MHz, CDCl<sub>3</sub>) δ 100.7, 70.4, 70.2, 70.2, 69.8, 68.8, 63.7, 23.5.

**HRMS** (ESI-TOF) *m/z*: [M+H]<sup>+</sup> Calcd for C<sub>12</sub>H<sub>15</sub>ORu 277.0161; Found: 277.0158.

**Chiral HPLC:** The ee value was 93%, *t*<sub>S</sub> (major) = 7.0 min, *t*<sub>R</sub> (minor) = 7.6 min (Chiralpak IC, λ = 254 nm, 10% isopropanol/hexanes, flow rate = 1.0 mL/min).

### 3. Optimization of Reaction Conditions

#### 3.1 Table S1: Screening buffer as the reaction solvent

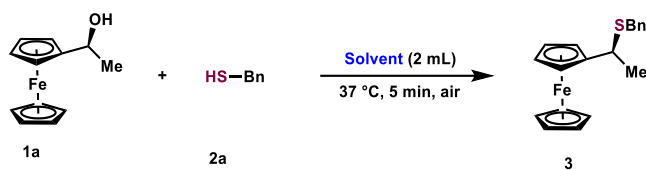

| Entry | <b>1a</b> (mmol) | <b>2a</b> (mmol) | Solvent                | Yield (%) <sup>b</sup> |
|-------|------------------|------------------|------------------------|------------------------|
| 1     | 0.2              | 0.4              | PB buffer pH = 6       | n.r.                   |
| 2     | 0.2              | 0.4              | PB buffer pH = 7       | n.r.                   |
| 3     | 0.2              | 0.4              | PB buffer pH = 8       | n.r.                   |
| 4     | 0.2              | 0.4              | PB buffer pH = 9       | n.r.                   |
| 5     | 0.2              | 0.4              | Tris-HCl buffer pH = 6 | n.r.                   |
| 6     | 0.2              | 0.4              | Tris-HCl buffer pH = 7 | n.r.                   |
| 7     | 0.2              | 0.4              | Tris-HCl buffer pH = 8 | n.r.                   |
| 8     | 0.2              | 0.4              | Tris-HCl buffer pH = 9 | n.r.                   |

<sup>a</sup>Reaction conditions unless otherwise noted: **1a** (0.2 mmol) and **2a** (0.4 mmol) in buffer (2.0 mL) as solvent at 37 °C for 5 min under air. <sup>b</sup>n.r. = no reaction.

### 3.2 Table S2: Screening ion-pairs for the reaction

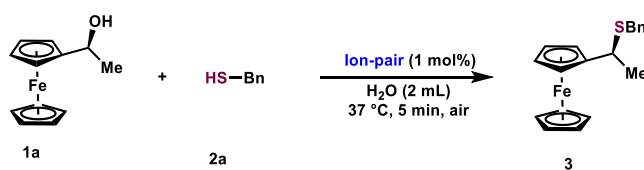

| Entry | <b>1a</b> (mmol) | <b>2a</b> (mmol) | Ion-pair (1 mol%) | Yield (%) <sup>b</sup> | Ee (%) <sup>c</sup> |
|-------|------------------|------------------|-------------------|------------------------|---------------------|
| 1     | 0.2              | 0.4              | ion-pair-1        | 98                     | 98                  |
| 2     | 0.2              | 0.4              | ion-pair-2        | n.r.                   | -                   |
| 3     | 0.2              | 0.4              | 3                 | n.r.                   | -                   |
| 4     | 0.2              | 0.4              | ion-pair-4        | 15                     | 98                  |
| 5     | 0.2              | 0.4              | ion-pair-5        | n.r.                   | -                   |
| 6     | 0.2              | 0.4              | 6                 | 92                     | 98                  |
| 7     | 0.2              | 0.4              | ion-pair-7        | 90                     | 97                  |
| 8     | 0.2              | 0.4              | ion-pair-8        | 99                     | 99                  |
| 9     | 0.2              | 0.4              | ion-pair-9        | 90                     | 96                  |
| 10    | 0.2              | 0.4              | ion-pair-10       | 21                     | 95                  |
| 11    | 0.2              | 0.4              | ion-pair-11       | 92                     | 97                  |
| 12    | 0.2              | 0.4              | ion-pair-12       | 44                     | 99                  |

<sup>a</sup>Reaction conditions unless otherwise noted: **1a** (0.2 mmol), **2a** (0.4 mmol) and ion-pair (1 mol%) in H<sub>2</sub>O (2.0 mL) at 37 °C for the 5 min under air. <sup>b</sup>Yields were determined by <sup>1</sup>H NMR with CH<sub>2</sub>Br<sub>2</sub> as an internal standard. <sup>c</sup>Enantiomeric excess (Ee) was determined by HPLC on chiral stationary phases.

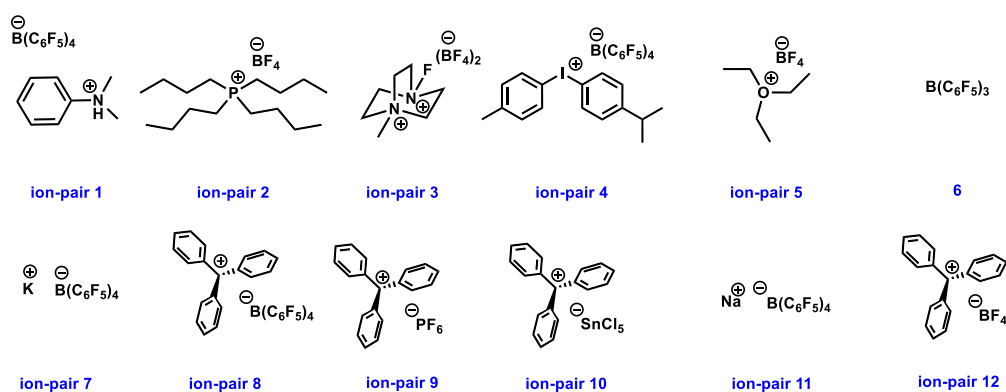

### 3.3 Table S3: Screening the reaction time

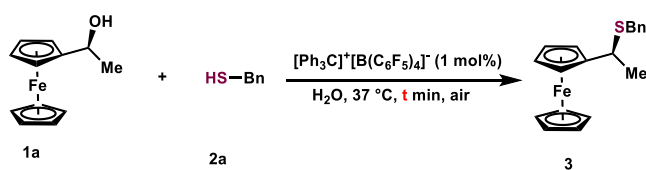

| <sup>a</sup> Entry | <b>1a</b> (mmol) | <b>2a</b> (mmol) | Time (min) | Yield (%) <sup>b</sup> | Ee (%) <sup>c</sup> |
|--------------------|------------------|------------------|------------|------------------------|---------------------|
| 1                  | 0.2              | 0.4              | 1          | 88                     | 98                  |
| 2                  | 0.2              | 0.4              | 3          | 95                     | 98                  |
| 3                  | 0.2              | 0.4              | 5          | 97                     | 99                  |

<sup>a</sup>Reaction conditions unless otherwise noted: **1a** (0.2 mmol), **2a** (0.4 mmol) and  $[\text{Ph}_3\text{C}]^+[\text{B}(\text{C}_6\text{F}_5)_4]^-$  (1 mol%) in  $\text{H}_2\text{O}$  (2.0 mL) at 37 °C for the indicated time under air. <sup>b</sup>Yields were determined by  $^1\text{H}$  NMR with  $\text{CH}_2\text{Br}_2$  as an internal standard.

### 3.4 Table S4: Screening the equivalent of 2a

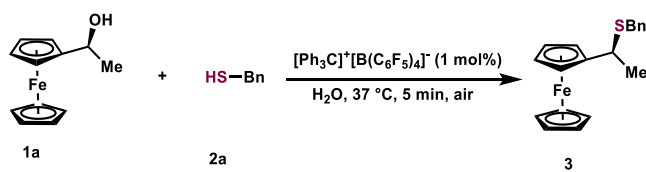

| <sup>a</sup> Entry | <b>1a</b> (mmol) | <b>2a</b> (mmol) | t (min) | Yield (%) <sup>b</sup> | Ee (%) <sup>c</sup> |
|--------------------|------------------|------------------|---------|------------------------|---------------------|
| 1                  | 0.2              | 0.24             | 5       | 89                     | 99                  |
| 2                  | 0.2              | 0.3              | 5       | 94                     | 97                  |
| 3                  | 0.2              | 0.36             | 5       | 94                     | 99                  |
| 4                  | 0.2              | 0.4              | 5       | 95                     | 98                  |

<sup>a</sup>Reaction conditions unless otherwise noted: **1a** (0.2 mmol), **2a** (x mmol) and  $[\text{Ph}_3\text{C}]^+[\text{B}(\text{C}_6\text{F}_5)_4]^-$  (1 mol%) in  $\text{H}_2\text{O}$  (2.0 mL) at 37 °C for the 5 min under air. <sup>b</sup>Yield was determined by isolated yield.

## 4. Experimental Section

### 4.1 General Procedure Condition A

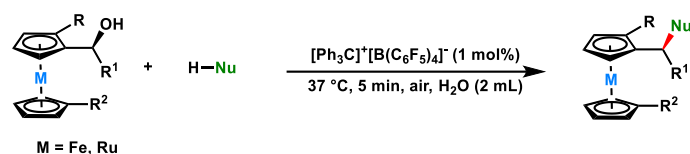

To a glass vials (10 mL) equipped with a magnetic stirrer, alcohols (0.2 mmol),  $[\text{Ph}_3\text{C}]^+[\text{B}(\text{C}_6\text{F}_5)_4]^-$  (0.002 mmol, 1.8 mg) and nucleophiles (0.3 mmol) were added. Then, 2.0 mL  $\text{H}_2\text{O}$  were charged *via* syringe. Subsequently, the tube was sealed and the solution was stirred at 37 °C for 5 min. Upon completion of the reaction, the mixture was extracted with EtOAc ( $3 \times 10$  mL), dry with anhydrous  $\text{Na}_2\text{SO}_4$ , and concentrate under reduced pressure. The crude mixture was purified by flash column chromatography on silica gel to afford the products. For example, **1a** (0.2 mmol, 46 mg),  $[\text{Ph}_3\text{C}]^+[\text{B}(\text{C}_6\text{F}_5)_4]^-$  (0.002 mmol, 1.8 mg) and **2a** (0.3 mmol, 37.3 mg) were added. Then, 2.0 mL  $\text{H}_2\text{O}$  were charged *via* syringe. Subsequently, the tube was sealed and the solution was stirred at 37 °C for 5 min. Upon completion of the reaction, the mixture was extracted with EtOAc ( $3 \times 10$  mL), dry with anhydrous  $\text{Na}_2\text{SO}_4$ , and concentrate under reduced pressure. The crude mixture was purified by flash column chromatography on silica gel (PE) to obtain product **3** as a yellow oil, 63 mg, 94% yield. **TLC**:  $R_f = 0.68$  (petroleum ether/Ethyl acetate = 20/1); 63 mg, yield: 94%; yellow oil.  $[\alpha]_D^{23.8} = 8$  ( $c = 1.0$ ,  $\text{CHCl}_3$ ).

**$^1\text{H}$  NMR** (400 MHz,  $\text{CDCl}_3$ )  $\delta$  7.33 – 7.23 (m, 5H), 4.19 – 4.14 (m, 9H), 3.71 – 3.61 (m, 3H), 1.64 (d,  $J = 7.0$  Hz, 3H).

**$^{13}\text{C}$  NMR** (101 MHz,  $\text{CDCl}_3$ )  $\delta$  138.5, 128.8, 128.4, 126.8, 91.5, 68.6, 67.8, 67.7, 67.4, 65.9, 38.6, 35.5, 21.3.

**HRMS** (ESI-TOF)  $m/z$ :  $[\text{M}+\text{K}]^+$  Calcd for  $\text{C}_{19}\text{H}_{20}\text{FeSK}$  375.0261; Found: 375.0274.

**Chiral HPLC**: The ee value was 99%,  $t_R$  (minor) = 6.3 min,  $t_S$  (major) = 7.3 min (Chiralpak IA,  $\lambda = 254$  nm, 3% isopropanol/hexanes, flow rate = 0.8 mL/min).

## 4.2 General Procedure Condition B

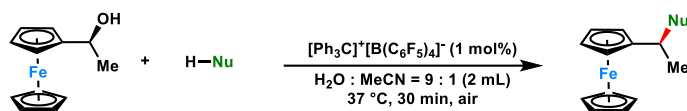

To a glass vials (10 mL) equipped with a magnetic stirrer, (*S*)-1-ferrocenylethanol (0.2 mmol), [Ph<sub>3</sub>C]<sup>+</sup>[B(C<sub>6</sub>F<sub>5</sub>)<sub>4</sub>]<sup>-</sup> (0.002 mmol, 1.8 mg) and nucleophiles (sulfonamides or indoles) (0.3 mmol) were added. Then, 0.2 mL MeCN and 1.8 mL H<sub>2</sub>O were charged *via* syringe. Subsequently, the tube was sealed and the solution was stirred at 37 °C for 0.5 h. When the reaction was complete, the mixture was extracted with EtOAc (3 × 10 mL), dry with anhydrous Na<sub>2</sub>SO<sub>4</sub>, and concentrate under reduced pressure. The crude mixture was purified by flash column chromatography on silica gel to afford the products. For example, **1a** (0.2 mmol, 46 mg), [Ph<sub>3</sub>C]<sup>+</sup>[B(C<sub>6</sub>F<sub>5</sub>)<sub>4</sub>]<sup>-</sup> (0.002 mmol, 1.8 mg) and **S56** (0.3 mmol, 43.2 mg) were added. Then, 0.2 mL MeCN and 1.8 mL H<sub>2</sub>O were charged *via* syringe. Subsequently, the tube was sealed and the solution was stirred at 37 °C for 30 min. When the reaction was complete, the mixture was extracted with EtOAc (3 × 10 mL), dry with anhydrous Na<sub>2</sub>SO<sub>4</sub>, and concentrate under reduced pressure. The crude mixture was purified by flash column chromatography on silica gel (petroleum ether/Ethyl acetate=15/1) to obtain product **64** as a yellow solid, 41 mg, 60% yield.

**TLC:** R<sub>f</sub> = 0.72 (petroleum ether/Ethyl acetate = 10:1); 41 mg, yield: 60%; yellow solid.

**<sup>1</sup>H NMR** (400 MHz, CDCl<sub>3</sub>) δ 7.58 (d, *J* = 7.8 Hz, 1H), 7.44 (d, *J* = 8.2 Hz, 1H), 7.26 – 7.22 (m, 1H), 7.15 – 7.11(m, 1H), 6.81 (s, 1H), 5.53 (q, *J* = 6.9 Hz, 1H), 4.34 – 4.33 (m, 1H), 4.22 – 4.15 (m, 8H), 2.31 (d, *J* = 1.1 Hz, 3H), 1.83 (d, *J* = 6.9 Hz, 3H).

**<sup>13</sup>C NMR** (101 MHz, CDCl<sub>3</sub>) δ 135.7, 128.6, 122.4, 121.1, 119.0, 118.4, 110.1, 109.1, 89.6, 68.8, 68.4, 68.1, 67.5, 66.4, 50.4, 20.6, 9.7.

**HRMS** (ESI-TOF) *m/z*: [M]<sup>+</sup> Calcd for C<sub>21</sub>H<sub>21</sub>FeN 343.1018; Found: 343.1021.

**Chiral HPLC:** The ee value was 95%, *t<sub>R</sub>* (minor) = 19.0 min, *t<sub>S</sub>* (major) = 21.1 min (Chiralpak IA, λ = 254 nm, 1% isopropanol/hexanes, flow rate = 0.2 mL/min).

### 4.3 General Procedure Condition C

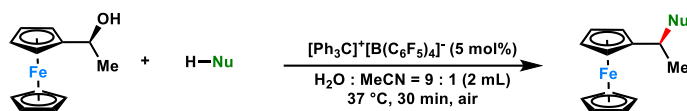

To a glass vials (10 mL) equipped with a magnetic stirrer, (*S*)-1-ferrocenylethanol (0.2 mmol),  $[\text{Ph}_3\text{C}]^+[\text{B}(\text{C}_6\text{F}_5)_4]^-$  (0.01 mmol, 9.2 mg) and heterocyclics or other nucleophiles (0.4 mmol) were added. Then, 0.2 mL MeCN and 1.8 mL  $\text{H}_2\text{O}$  were charged *via* syringe. Subsequently, the tube was sealed and the solution was stirred at 37 °C for 0.5 h. When the reaction was complete, the mixture was extracted with EtOAc ( $3 \times 10$  mL), dry with anhydrous  $\text{Na}_2\text{SO}_4$ , and concentrate under reduced pressure. The crude mixture was purified by flash column chromatography on silica gel to afford the heterocyclics. For example, **1a** (0.2 mmol, 46 mg),  $[\text{Ph}_3\text{C}]^+[\text{B}(\text{C}_6\text{F}_5)_4]^-$  (0.01 mmol, 9.2 mg) and **S62** (0.3 mmol, 63 mg) were added. Then, 0.2 mL MeCN and 1.8 mL  $\text{H}_2\text{O}$  were charged *via* syringe. Subsequently, the tube was sealed and the solution was stirred at 37 °C for 30 min. When the reaction was complete, the mixture was extracted with EtOAc ( $3 \times 10$  mL), dry with anhydrous  $\text{Na}_2\text{SO}_4$ , and concentrate under reduced pressure. The crude mixture was purified by flash column chromatography on silica gel (petroleum ether/Ethyl acetate=15/1) to obtain product **55** as a yellow solid, 65 mg, 77% yield.

**TLC:**  $R_f = 0.46$  (petroleum ether/Ethyl acetate = 8/1); 65 mg, yield: 77%; yellow solid.

**$^1\text{H}$  NMR** (400 MHz,  $\text{CDCl}_3$ )  $\delta$  7.89 (s, 1H), 7.87 (s, 1H), 7.28 (s, 1H), 5.67 (q,  $J = 7.0$  Hz, 1H), 4.29 (d,  $J = 1.9$  Hz, 1H), 4.16 (t,  $J = 2.1$  Hz, 2H), 4.13 (s, 6H), 2.51 (s, 3H), 1.92 (d,  $J = 7.0$  Hz, 3H).

**$^{13}\text{C}$  NMR** (101 MHz,  $\text{CDCl}_3$ )  $\delta$  138.0, 135.2, 131.5, 124.0, 117.1, 110.4, 89.1, 68.8, 68.4, 67.8, 67.6, 66.5, 54.6, 24.2, 20.0.

**HRMS** (ESI-TOF)  $m/z$ :  $[\text{M}+\text{K}]^+$  Calcd for  $\text{C}_{20}\text{H}_{19}\text{BrFeN}_2\text{K}$  460.9707; Found: 460.9708.

**Chiral HPLC:** The ee value was 99%,  $t_S$  (major) = 6.7 min,  $t_R$  (minor) = 12.8 min (Chiralcel OD-H,  $\lambda = 254$  nm, 15% isopropanol/hexanes, flow rate = 1.0 mL/min).

#### 4.4 Gram Scale Reaction

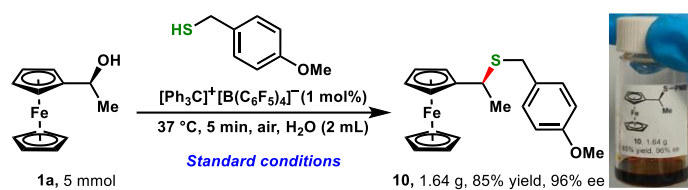

To a well-dried Schlenk tube (250 mL) equipped with a magnetic stir bar, (*S*)-1-ferrocenylethanol (5 mmol, 1.15 g),  $[\text{Ph}_3\text{C}]^+[\text{B}(\text{C}_6\text{F}_5)_4]^-$  (0.05 mmol, 45 mg) and *p*-methoxybenzyl mercaptan (7.5 mmol, 1.16 g) were added. Then, 50 mL  $\text{H}_2\text{O}$  were charged *via* syringe. Subsequently, the tube was sealed and the solution was stirred at 37 °C for 5 min. When the reaction was complete, the mixture was extracted with EtOAc ( $3 \times 150$  mL), dry with anhydrous  $\text{Na}_2\text{SO}_4$ , and concentrate under reduced pressure. The crude mixture was purified by flash column chromatography on silica gel (petroleum ether/Ethyl acetate 20:1) to obtain product **10** as a yellow oil, 1.64 g, 85% yield, 96% ee.

## 5. Mechanistic Study

### 5.1 Competition experiments of **1a** with **2a** and **2c**

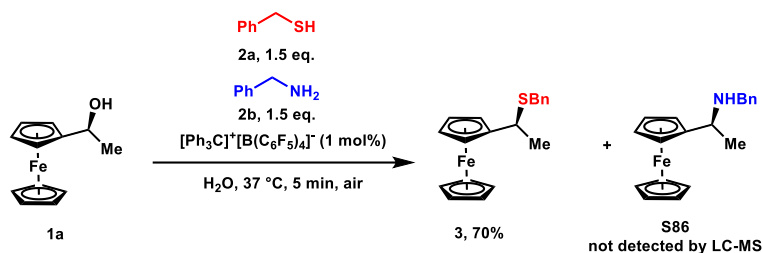

**Figure S1.** Competition experiments of **1a** with **2a** and **2b**.

*General procedure of the reaction shown in Figure S1:* To a glass vial (10 mL) equipped with a magnetic stirrer, 2.0 mL  $\text{H}_2\text{O}$  was added to the mixture of **1a** (0.2 mmol),  $[\text{Ph}_3\text{C}]^+[\text{B}(\text{C}_6\text{F}_5)_4]^-$  (0.002 mmol, 1.8 mg), **2a** (0.3 mmol) and **2b** (0.3 mmol). Subsequently, the tube was sealed and the solution was stirred at 37 °C for 5 minutes. Upon completion of the reaction, the mixture was extracted with EtOAc ( $3 \times 10$  mL), dry with anhydrous  $\text{Na}_2\text{SO}_4$ , and concentrate under reduced pressure. The residue was purified by silica flash column chromatography to obtain the pure product **3** (47 mg, 70% yield). However, **S86** was not detected by LC-MS.

#### (S)-1-(benzylthio)ethylferrocene (**3**)

$^1\text{H NMR}$  (400 MHz,  $\text{CDCl}_3$ )  $\delta$  7.33 – 7.23 (m, 5H), 4.19 – 4.14 (m, 9H), 3.71 – 3.61 (m, 3H), 1.64 (d,  $J = 7.0$  Hz, 3H).

$^{13}\text{C NMR}$  (101 MHz,  $\text{CDCl}_3$ )  $\delta$  138.5, 128.8, 128.4, 126.8, 91.5, 68.6, 67.8, 67.7, 67.4, 65.9, 38.6, 35.5, 21.3.

**HRMS** (ESI-TOF)  $m/z$ :  $[\text{M}+\text{K}]^+$  Calcd for  $\text{C}_{19}\text{H}_{20}\text{FeSK}$  375.0261; Found: 375.0274.

## 5.2 Chemo-selectivity of **1a** conjugating with **2a** in the presence of nucleophilic amino acids

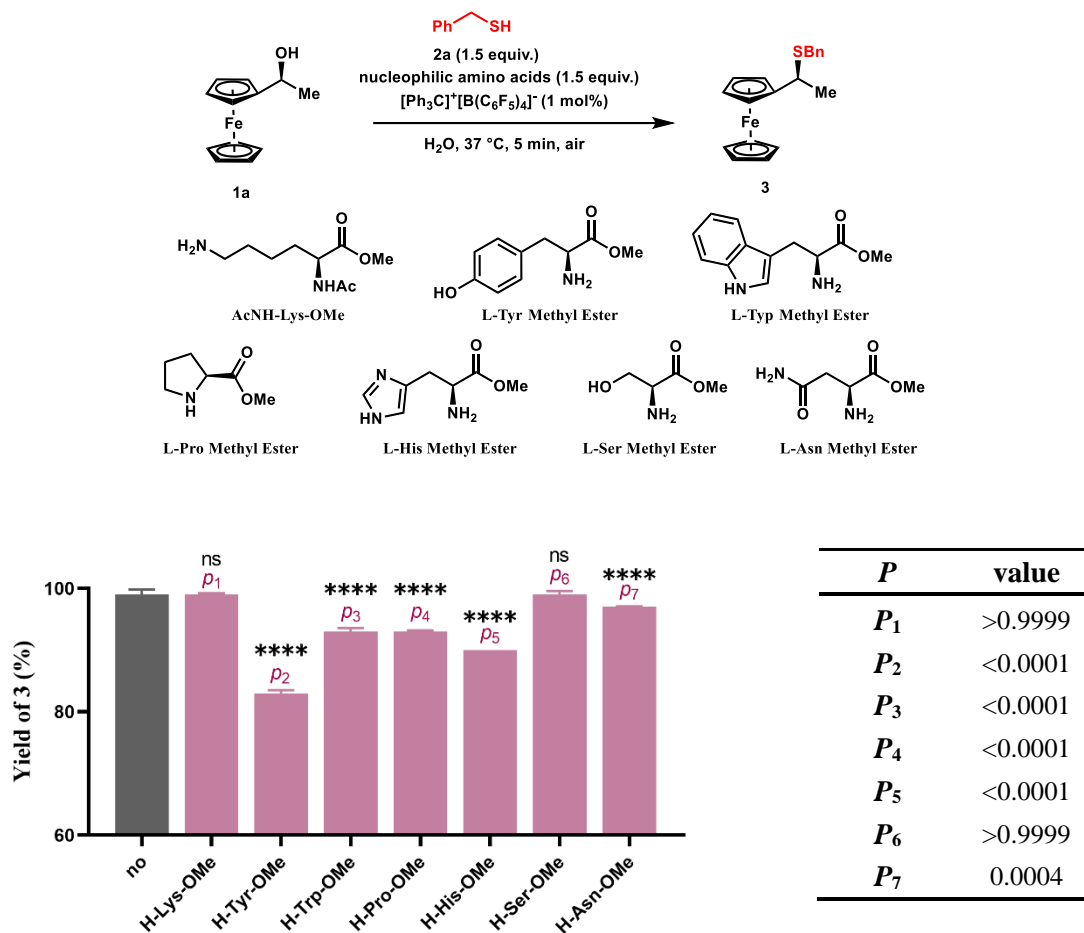

**Figure S2.** Chemo-selectivity of **1a** towards various nucleophiles. Statistical significance between the two groups was calculated *via* a Tukey post-hoc test: ns,  $p > 0.05$ . The mean values and SD are presented ( $n = 3$  independent times).

*General procedure of the reaction shown in Figure S2:* To a glass vial (10 mL) equipped with a magnetic stir bar, 2 mL of  $\text{H}_2\text{O}$  was added to the mixture of **1a** (23 mg, 0.1 mmol), **2a** (18.6 mg, 0.15 mmol, 1.5 equiv.) and  $[\text{Ph}_3\text{C}]^+[\text{B}(\text{C}_6\text{F}_5)_4]^-$  (0.002 mmol, 1.8 mg), respectively. Afterwards, the corresponding nucleophilic amino acid (0.15 mmol, 1.5 equiv.) was added. After stirring for 5 min at 37 °C, the reaction was quenched and extracted with EtOAc. Then, the organic phases were collected and concentrated under reduced pressure. The crude  $^1\text{H-NMR}$  was analyzed to determine the yields of **3** using  $\text{CH}_2\text{Br}_2$  as the internal standard.

### 5.3 Studies on stability of **3** under various conditions

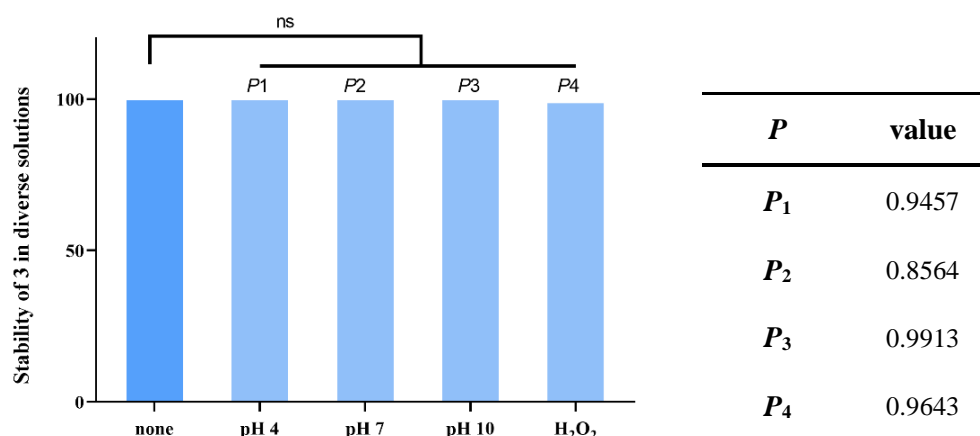

**Figure S3.** Stability of **3** under various conditions.

**Stability of **3** under various conditions.** Statistical significance between the two groups was calculated via a Tukey post-hoc test, ns means no significance,  $p > 0.05$ . The mean values and SD are presented ( $n = 3$  independent times).

*General procedure of the reaction shown in Figure S3:* To a glass vials (10 mL) equipped with a magnetic stir bar, 2 mL of the depicted solution was added and mixed with **3** (0.05 mmol, 16.8 mg, 1.0 equiv. After stirring for 24 hours at 37 °C. Subsequently, the mixture was extracted with EtOAc ( $3 \times 5$  mL). The organic layer was washed with brine and dried over anhydrous sodium sulfate and concentrated under the reduced pressure to obtain the crude samples. The yield was determined by <sup>1</sup>H NMR analysis with CH<sub>2</sub>Br<sub>2</sub> as an internal standard.

General procedure of the reaction shown in Figure S4: To 10 mL reaction tube, 2 mL of H<sub>2</sub>O was added to the mixture of **3** (16.8 mg, 0.05 mmol, 1.0 equiv.) and different endogenous molecules (0.05 mmol, 1.0 equiv.). After stirring for 24 hours at 37 °C, the reaction was quenched and extracted with EtOAc. Then, the organic phases were collected and concentrated under reduced pressure. The crude <sup>1</sup>H-NMR was analyzed to determine the yields of **3** using CH<sub>2</sub>Br<sub>2</sub> as the internal standard.

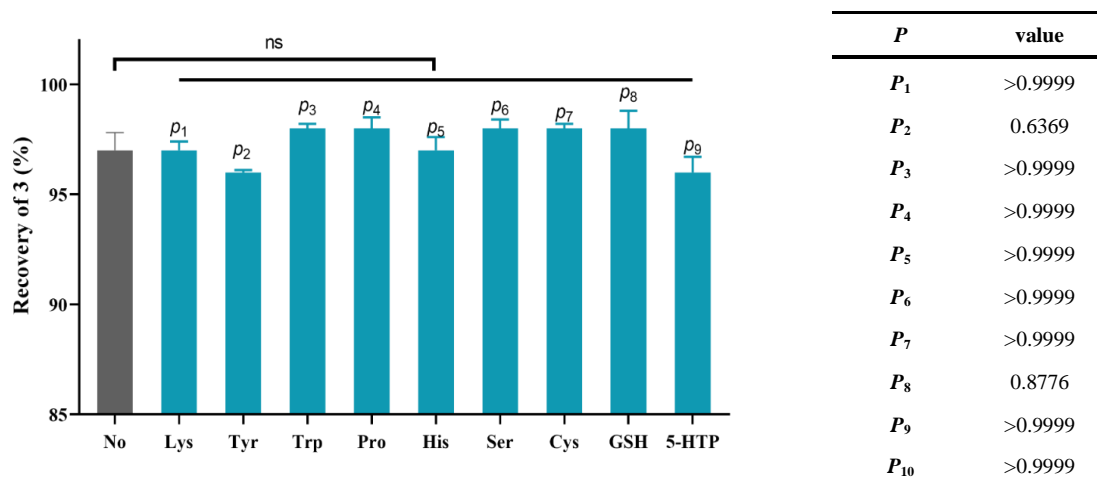

**Figure S4.** Stability of **3** in the presence of endogenous molecules. Statistical significance between the two groups was calculated *via* a Tukey post-hoc test: ns, > 0.05. The mean values and SD are presented (n = 3 independent times).

## 5.4 Modification of peptides Octreotide acetate

*General procedure for reactions of peptides Octreotide acetate with 1a:* To a 10 mL reaction tube, **1a** (57.5 mg, 250  $\mu\text{mol}$ , 50 equiv.), Octreotide acetate (6.0 mg, 5  $\mu\text{mol}$ ),  $[\text{Ph}_3\text{C}]^+[\text{B}(\text{C}_6\text{F}_5)_4]^-$  (0.5 mg, 0.05  $\mu\text{mol}$ , 0.1 equiv.) and  $\text{H}_2\text{O}$  (2.0 mL) were added. After slow stirring at 37  $^\circ\text{C}$  for 30 minutes, a 20  $\mu\text{L}$  aliquot of the reaction mixture was evaluated by performing ESI-MS, obtain the product OCT-1a.

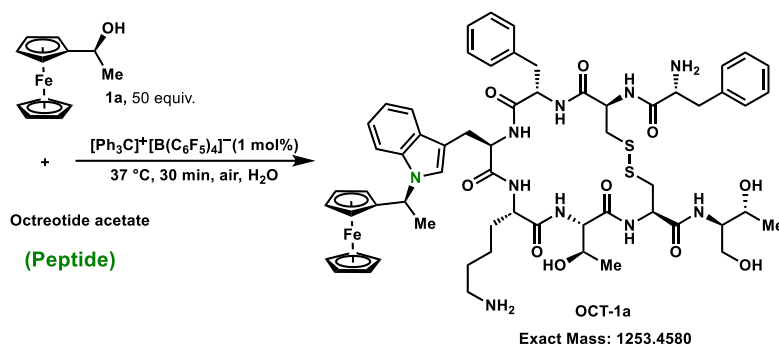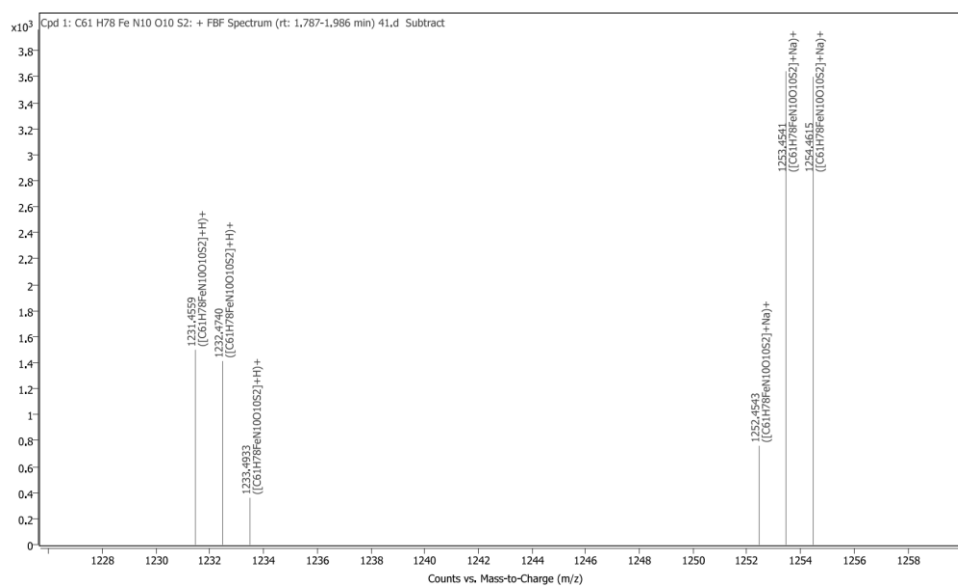

**Figure S5.** Showing HRMS of the peptide Octreotide acetate modified with **1a**.

## 5.5 Modification of Human Serum Albumin protein

ESI-MS was performed on a linear quadrupole ion trap detector mass spectrometer (LC/Q-TOF from Agilent). Data were processed using Agilent BioConfirm 12.1. Data were processed using Thermo BioPharma Finder 3.1. Albumin from human serum was purchased from Sigma-Aldrich (catalog No.: A3782). Protein was used without further purification. Sequence of albumin from human serum (HSA): HSA is composed of 585 amino acids and contains one free cysteine (Cys34) and 60 lysines.

DAHKSEVAHRFKDLGEEFKALVLI AFAQYLQQCPFEDHVKLVNEVTEFAKTCVAD  
ESAENC DKSLHTLFGDKLCTVATLRETYGEMADCCA KQEPERNECFLQHKDDNP NL  
PRLVRPEVDVMCTAFHDNEETFLKKYLYEIARRHPYFYAPELLFFAKRYKAAFTECC  
QAADKAA CLLPKLDEL RDEGKASSAKQRLK CASLQKFGERAFKAWAVARLSQRFPK  
AEFAEVSKLVTDLTKVHTECCHGDLLECADDRADLAKYICENQDSISSKLKECCEKP  
LLEKSHCIAEVENDEM RADLPSLAADFVESKDVCKNYAEAKDVFLGMFLYEYARRH  
PDYSVVLLLRLAKTYET TLEKCCAAADPHECYAKVFDEFKPLVEEPQNLIKQNC ELF  
EQLGEYKFQNALLVRYTKKVPQVSTPTLVEVSRNLGKVGSKCCKHPEAKRMPCAED  
YLSVVLNQLCVLHEKTPVSDRVTKCCTESLVNRRPCFSALEVDETYVPKEFNAETFTF  
HADICTLSEKERQIKKQTALVELVKHKPKATKEQLKAVMDDFAAFVEKCKKADDKE  
TCFAEEGKKLVAASQAALGL

*General procedure for reactions of HSA with 1a:* To a 10 mL reaction tube, **1a** (3.4 mg, 15  $\mu\text{mol}$ , 50 equiv.), albumin from human serum (HSA) (19.9 mg, 0.3  $\mu\text{mol}$ ),  $[\text{Ph}_3\text{C}]^+[\text{B}(\text{C}_6\text{F}_5)_4]^-$  (0.13 mg, 0.003  $\mu\text{mol}$ , 0.01 equiv.) and  $\text{H}_2\text{O}$  (4.0 mL) were added. After slow stirring at 37  $^\circ\text{C}$  for 30 minutes, a 20  $\mu\text{L}$  aliquot of the reaction mixture was evaluated by performing ESI-MS, obtain the product HSA-**1a**.

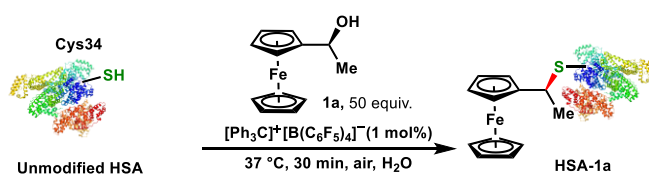

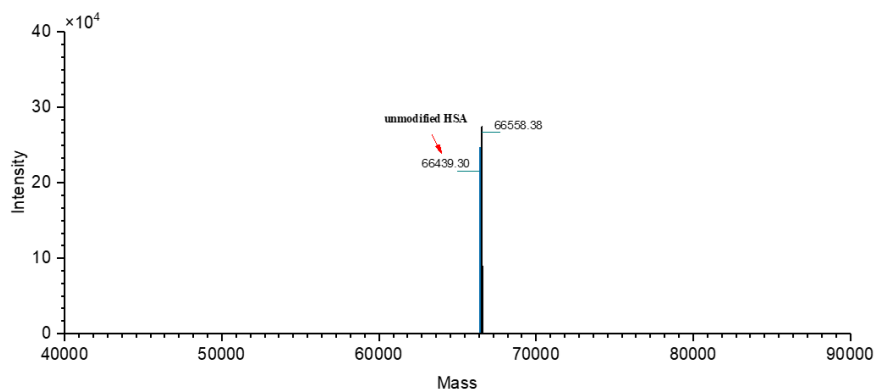

**Figure S6.** Deconvoluted mass spectrum of unmodified HSA.

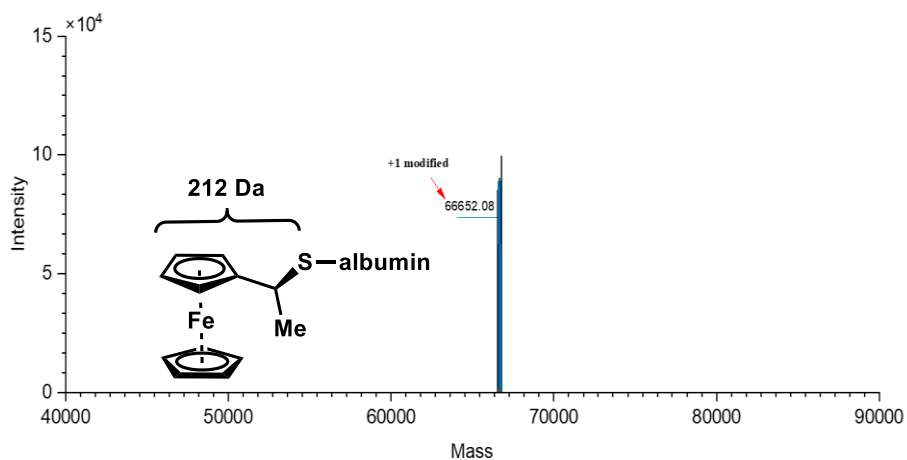

**Figure S7.** Modification results of HSA with **1a** in H<sub>2</sub>O: +1 modified = singly modified protein.

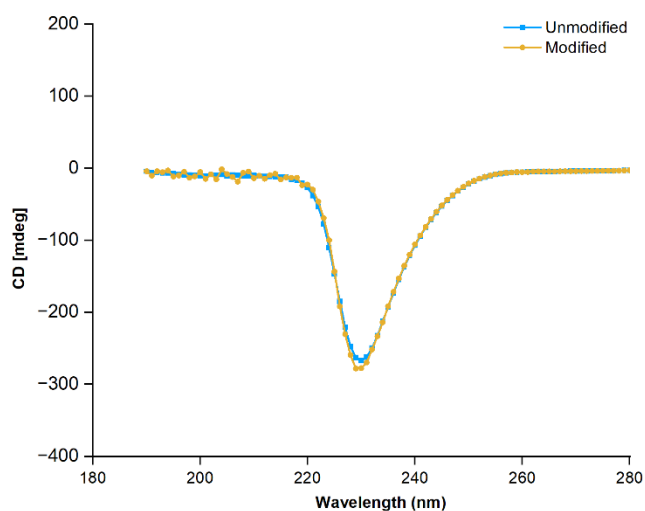

**Figure S8.** The CD spectra of native HSA and modified HSA with **1a**. The HSA concentrations were 0.5 mg/mL. All spectra were measured at 20 °C with 1 cm path length.

## 5.6 Proton scavenging experiment

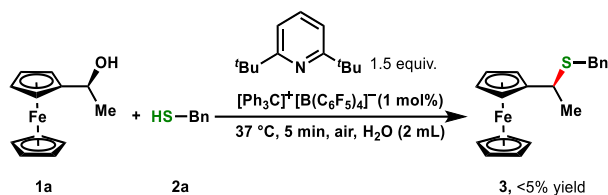

**Figure S9.** Proton scavenging experiment with 2,6-di-*tert*-butylpyridine.

To an over-dried reaction tube (10 mL) equipped with a magnetic stir bar, **1a** (0.2 mmol, 46 mg), 2,6-di-*tert*-butylpyridine (57.3 mg, 0.3 mmol), **2a** (0.3 mmol, 37.3 mg) and  $[\text{Ph}_3\text{C}]^+[\text{B}(\text{C}_6\text{F}_5)_4]^-$  (0.002 mmol, 1.8 mg) were added. Then, 2.0 mL  $\text{H}_2\text{O}$  were charged *via* syringe. Subsequently, the tube was sealed and the solution was stirred at 37 °C for 5 min. Then, the mixture was extracted with EtOAc ( $3 \times 10$  mL), dry with anhydrous  $\text{Na}_2\text{SO}_4$ , and concentrate under reduced pressure. The filtrate was concentrated under reduced pressure and the residue was analyzed by  $^1\text{H}$  NMR. The result showed that the yield of **3** was down to less than 5%, which indicated the possible involvement of Brønsted acid achieving this sustainable process.

### 5.7 The linear effect of substrate (S)-1a

To an over-dried reaction tube (10 mL) equipped with a magnetic stir bar, varying optical purity **1a** (0.2 mmol, 46 mg), **2a** (0.3 mmol, 37.3 mg) and  $[\text{Ph}_3\text{C}]^+[\text{B}(\text{C}_6\text{F}_5)_4]^-$  (0.002 mmol, 1.8 mg) were added. Then, 2.0 mL  $\text{H}_2\text{O}$  were charged *via* syringe. Subsequently, the tube was sealed and the solution was stirred at 37 °C for 5 min. Upon completion of the reaction, the mixture was extracted with EtOAc ( $3 \times 10$  mL), dry with anhydrous  $\text{Na}_2\text{SO}_4$ , and concentrate under reduced pressure. The filtrate was concentrated under reduced pressure and the residue was analyzed by HPLC. The studies of nonlinear effect using standard condition with varying optical purity **1a** resulted in a linear correlation between the the ee values of **1a** and **3**. This observation suggests that the chirality of the product is exclusively determined by the substrate and remains stereochemically stable throughout the reaction process, with no observed racemization.

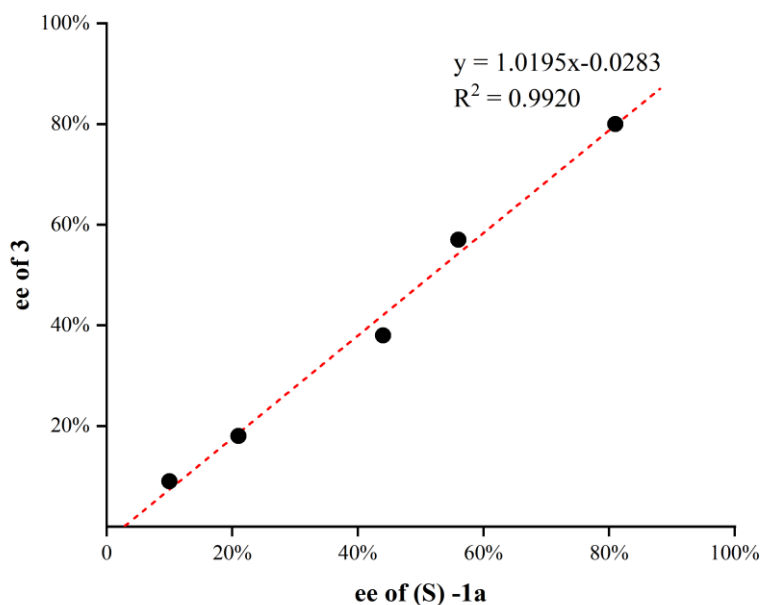

**Figure S10.** The linear effect of substrate (S)-1a.

### 5.8 The stability of **3** at varying time intervals

To an over-dried reaction tube (10 mL) equipped with a magnetic stir bar, **1a** (0.2 mmol, 46 mg), **2a** (0.3 mmol, 37.3 mg) and  $[\text{Ph}_3\text{C}]^+[\text{B}(\text{C}_6\text{F}_5)_4]^-$  (0.002 mmol, 1.8 mg) were added. Then, 2.0 mL  $\text{H}_2\text{O}$  were charged *via* syringe. After stirring for 5–25 minutes at 37 °C, the mixture was extracted with EtOAc ( $3 \times 10$  mL), dry with anhydrous  $\text{Na}_2\text{SO}_4$ , and concentrate under reduced pressure. The filtrate was concentrated under reduced pressure and enantiomeric excess (ee) was determined by HPLC.

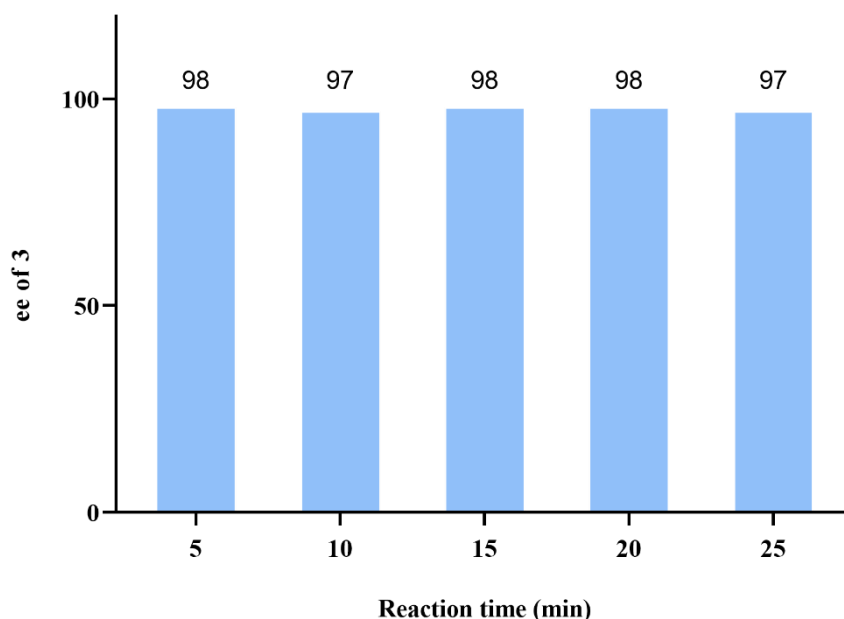

**Figure S11.** The stability of **3** at the reaction duration.

To an over-dried reaction tube (10 mL) equipped with a magnetic stir bar, **1a** (0.2 mmol, 46 mg) and  $[\text{Ph}_3\text{C}]^+[\text{B}(\text{C}_6\text{F}_5)_4]^-$  (0.002 mmol, 1.8 mg) were added. Then, 2.0 mL  $\text{H}_2\text{O}$  were charged *via* syringe. After stirring for 0.5–72 hours at 37 °C, **2a** (0.3 mmol, 37.3 mg) was added. After stirring 5 min at 37 °C, the mixture was extracted with EtOAc ( $3 \times 10$  mL), dry with anhydrous  $\text{Na}_2\text{SO}_4$ , and concentrate under reduced pressure. The filtrate was concentrated under reduced pressure by  $^1\text{H}$  NMR and enantiomeric excess (ee) was determined by HPLC.

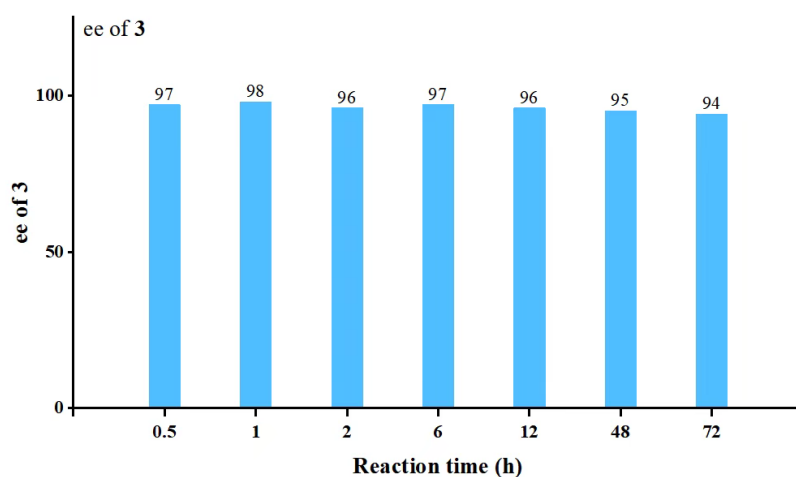

**Figure S12.** The stability of product **3** under the sequential addition protocol involving **2a**.

The results indicate that neither the reaction duration nor the sequential addition protocol, specifically, the addition of (*S*)-1-ferrocenylethanol (**1a**) followed by catalyst introduction and subsequent addition of substrate **2a** at varying time intervals, affects the enantiomeric excess (ee) of product **3**. This observation confirms the configurational stability of product **3** under the reaction conditions and its resistance to racemization.

## 5.9 DFT Calculations

### Computational details

All density functional theory (DFT) calculations were carried out with the Gaussian 16 program package,<sup>6</sup> and the structures were illustrated by CYLview20<sup>7</sup> (Figure S13). The geometry optimizations were carried out for all molecules using the B3PW91 functional.<sup>8,9</sup> 6-31G\*\*<sup>10</sup> basis set was used for C, H, O, F, B and S atoms, while the effective core potential (ECPs) of Dolg with a corresponding basis set was used for Fe atom.<sup>11,12</sup> To take long range interactions into account, the Grimme's D3 dispersion corrections and Becke-Johnson damping (DFT-D3BJ) were employed.<sup>13</sup> The effects of solvation in water were accounted for implicitly using the SMD polarizable continuum model.<sup>14</sup> Intrinsic reaction coordinate (IRC)<sup>15</sup> calculations were conducted to verify the critical reaction steps involved in our proposed mechanisms. The energetic results were further improved by the single-point calculations at the M06-2X+D3<sup>16</sup> /6-311++G\*\*<sup>17</sup> /SMD.

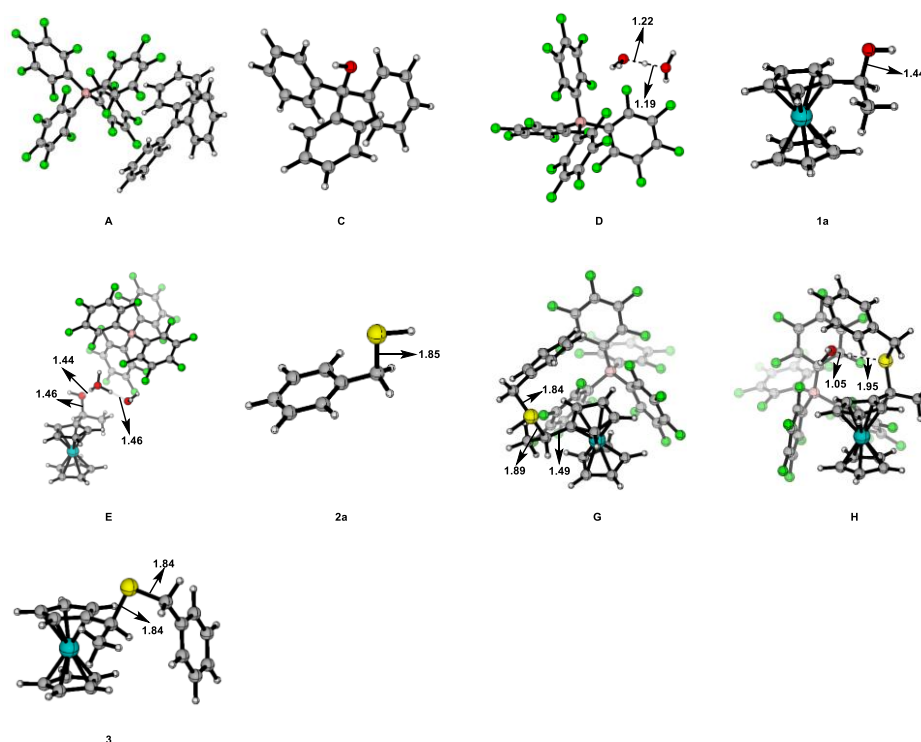

**Figure S13.** Computed structures of **A, C, D, 1a, E, 2a, G, H, 3** selected bond distance is given in Å (color code, C: grey, Fe: blue, O: red, H: white, F: green, S: yellow, B: pink).

To begin with, the addition of H<sub>2</sub>O to triphenyl carbenium ion-pair **A** affording the triphenylmethanol and tetrakis-(pentafluorophenyl)-boric acid was investigated (Figure S14).

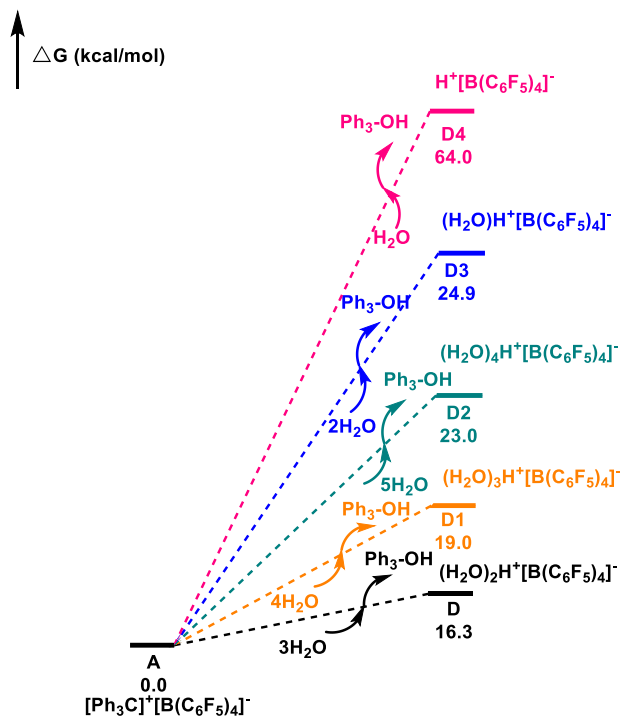

**Figure S14.** Computed energy profiles (DFT, M06-2X+D3/6-311++G\*\*/SMD//B3PW91 +D3BJ/6-31G\*\*/SMD and ECP basis set was used for Fe atom) for the addition of H<sub>2</sub>O to  $[\text{Ph}_3\text{C}]^+[\text{B}(\text{C}_6\text{F}_5)_4]^-$  (**A**).

Our investigation of water-mediated proton transfer from intermediate **G** revealed that the process employing one molecule of water exhibits the lowest energy barrier (Figure S15).

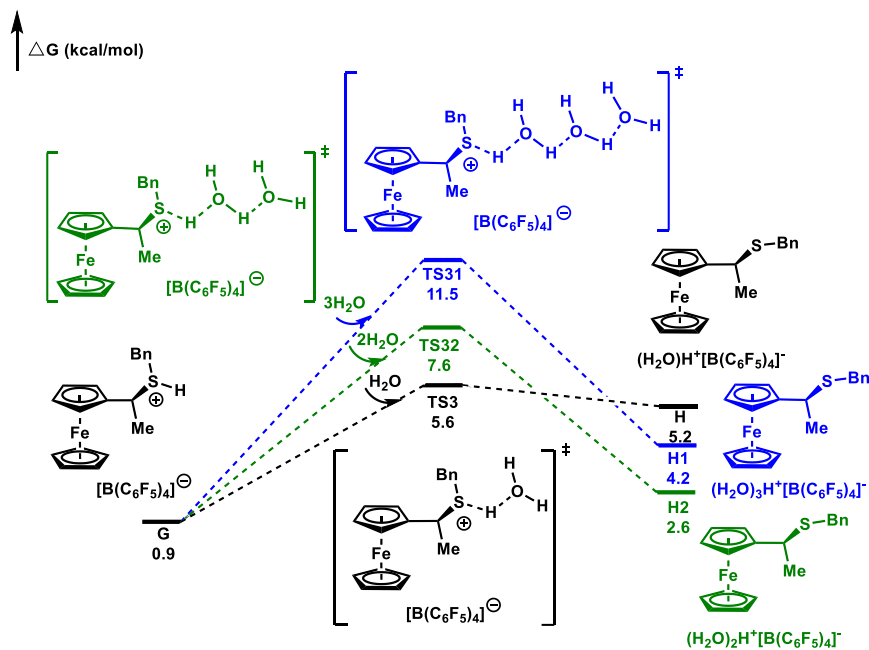

**Figure S15.** Computed energy profiles (DFT, M06-2X+D3/6-311++G\*\*/SMD//B3PW91+D3BJ/6-31G\*\*/SMD and ECP basis set was used for Fe atom) for the addition of H<sub>2</sub>O to intermediate **G**.

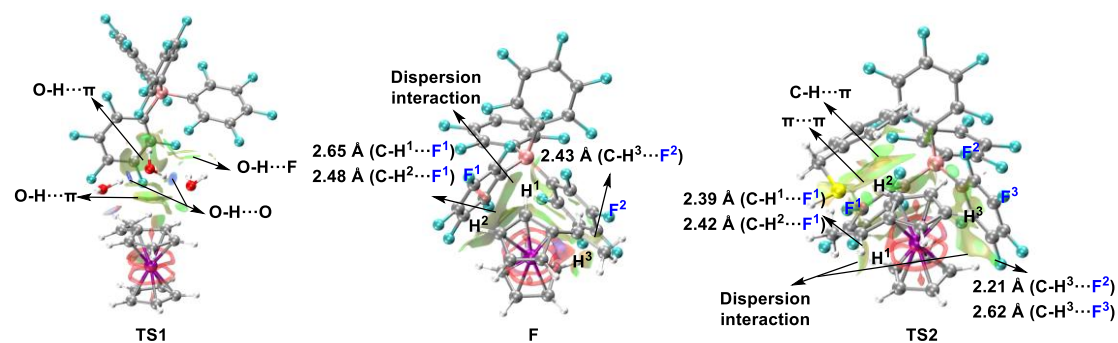

**Figure S16.** IGMH analysis of the non-covalent interactions. A green isosurface represents the dispersion interactions; a blue isosurface represents the hydrogen-bond interactions.

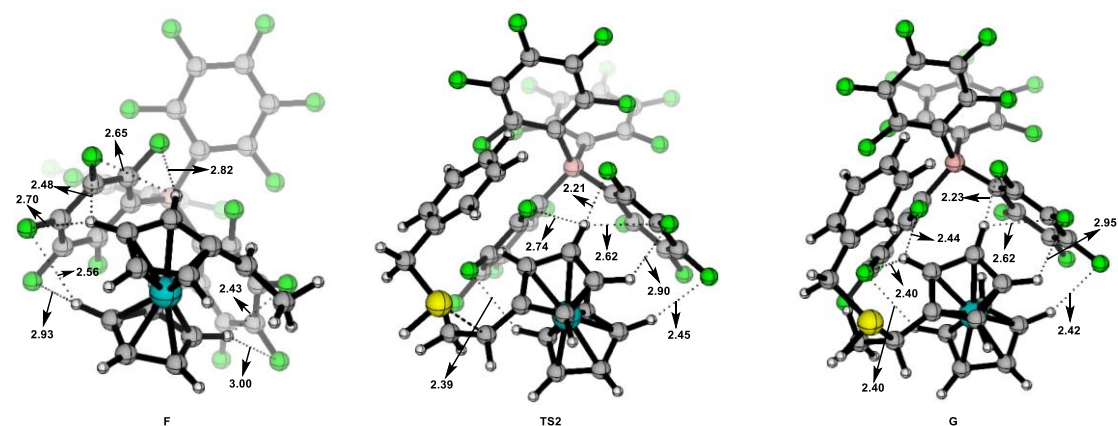

**Figure S17.** Computed structures of **F**, **TS2**, **G**. The distances for the C–H···F dispersion interactions are given in Å (color code, C: grey, Fe: blue, H: white, F: green, S: yellow, B: pink).

**Coordinates and energies (hartree) of the calculated structures at the M06-2X+D3/6-311++G\*\*/SMD//B3PW91+D3BJ/6-31G\*\*/SMD and ECP basis set was used for Fe atom level.**

|                           |              |              |              |          |              |              |              |
|---------------------------|--------------|--------------|--------------|----------|--------------|--------------|--------------|
| A                         |              |              |              | C        | -5.639859000 | 1.224994000  | 1.823548000  |
| Free energy: -3668.547485 |              |              |              | C        | -0.336597000 | 0.453394000  | 0.965420000  |
| C                         | 4.356228000  | -0.140583000 | -0.314896000 | C        | -0.126443000 | 1.786686000  | 1.315777000  |
| C                         | 3.749774000  | -1.240862000 | -1.028630000 | C        | 0.695469000  | -0.402544000 | 1.341434000  |
| C                         | 3.358388000  | -1.099234000 | -2.377529000 | C        | 0.971764000  | 2.245673000  | 2.026467000  |
| C                         | 3.521463000  | -2.467549000 | -0.364857000 | C        | 1.806424000  | 0.008960000  | 2.075026000  |
| C                         | 2.781737000  | -2.166213000 | -3.047265000 | C        | 1.943996000  | 1.341782000  | 2.426292000  |
| H                         | 3.553243000  | -0.166824000 | -2.894963000 | C        | -1.951587000 | -1.550877000 | -0.015213000 |
| C                         | 2.900567000  | -3.510682000 | -1.031977000 | C        | -2.287306000 | -2.265695000 | -1.161517000 |
| H                         | 3.776841000  | -2.561656000 | 0.683748000  | C        | -2.032802000 | -2.293530000 | 1.162983000  |
| C                         | 2.541680000  | -3.365475000 | -2.374210000 | C        | -2.628304000 | -3.615892000 | -1.154908000 |
| H                         | 2.503633000  | -2.061949000 | -4.089732000 | C        | -2.365402000 | -3.638652000 | 1.218328000  |
| H                         | 2.691152000  | -4.437673000 | -0.508591000 | C        | -2.667457000 | -4.311560000 | 0.042304000  |
| H                         | 2.067635000  | -4.190574000 | -2.896845000 | C        | -1.338684000 | 0.776268000  | -1.363569000 |
| C                         | 3.869746000  | 1.196450000  | -0.518005000 | C        | -1.857614000 | 1.983592000  | -1.823230000 |
| C                         | 2.519992000  | 1.391738000  | -0.894867000 | C        | -0.343076000 | 0.236821000  | -2.175883000 |
| C                         | 4.690195000  | 2.328300000  | -0.296799000 | C        | -1.439211000 | 2.601568000  | -2.999496000 |
| C                         | 2.000175000  | 2.668692000  | -1.013145000 | C        | 0.105527000  | 0.813743000  | -3.354648000 |
| H                         | 1.882410000  | 0.527707000  | -1.015046000 | C        | -0.451384000 | 2.014575000  | -3.773428000 |
| C                         | 4.163362000  | 3.601855000  | -0.427004000 | F        | 0.681005000  | -1.708283000 | 1.015064000  |
| H                         | 5.741908000  | 2.193374000  | -0.070500000 | F        | 2.752217000  | -0.873798000 | 2.428822000  |
| C                         | 2.818806000  | 3.773955000  | -0.771758000 | F        | 3.007628000  | 1.763317000  | 3.121313000  |
| H                         | 0.953576000  | 2.804796000  | -1.261323000 | F        | 1.112332000  | 3.546367000  | 2.311438000  |
| H                         | 4.798097000  | 4.467234000  | -0.268834000 | F        | -1.027409000 | 2.722231000  | 0.960124000  |
| H                         | 2.409251000  | 4.775768000  | -0.855710000 | F        | -1.777560000 | -1.701998000 | 2.346751000  |
| C                         | 5.418936000  | -0.415260000 | 0.617470000  | F        | -2.406978000 | -4.289179000 | 2.389195000  |
| C                         | 5.594388000  | 0.370064000  | 1.780074000  | F        | -2.994614000 | -5.607489000 | 0.066537000  |
| C                         | 6.296692000  | -1.499867000 | 0.381069000  | F        | -2.929250000 | -4.244831000 | -2.299686000 |
| C                         | 6.612216000  | 0.075595000  | 2.671456000  | F        | -2.309106000 | -1.683514000 | -2.375211000 |
| H                         | 4.890360000  | 1.160752000  | 2.002075000  | F        | -4.195954000 | 0.134487000  | -1.282066000 |
| C                         | 7.324983000  | -1.770865000 | 1.268133000  | F        | -6.588971000 | 0.760011000  | -0.288287000 |
| H                         | 6.189895000  | -2.084036000 | -0.525941000 | F        | -6.841566000 | 1.530742000  | 2.323045000  |
| C                         | 7.481112000  | -0.988091000 | 2.414927000  | F        | -4.619526000 | 1.648521000  | 3.906027000  |
| H                         | 6.724394000  | 0.664813000  | 3.575426000  | F        | -2.237579000 | 1.034732000  | 2.952350000  |
| H                         | 8.010472000  | -2.587494000 | 1.068050000  | F        | 0.266936000  | -0.906624000 | -1.799907000 |
| H                         | 8.281456000  | -1.210446000 | 3.113959000  | F        | 1.072739000  | 0.243936000  | -4.086214000 |
| C                         | -3.073082000 | 0.588016000  | 0.757725000  | F        | -0.037221000 | 2.595164000  | -4.903487000 |
| C                         | -4.247318000 | 0.522147000  | 0.007601000  | F        | -1.988570000 | 3.759439000  | -3.389918000 |
| C                         | -3.264240000 | 0.963552000  | 2.083957000  | F        | -2.814520000 | 2.643479000  | -1.145964000 |
| C                         | -5.506227000 | 0.835257000  | 0.497650000  | B        | -1.668432000 | 0.065563000  | 0.080691000  |
| C                         | -4.508439000 | 1.286089000  | 2.620429000  | <b>B</b> |              |              |              |

|                           |              |              |              |   |              |              |              |
|---------------------------|--------------|--------------|--------------|---|--------------|--------------|--------------|
| Free energy: -76.431055   |              |              |              | C | 0.748154000  | -0.607823000 | -1.209754000 |
| O                         | 0.000000000  | 0.000000000  | 0.120241000  | C | 1.838065000  | 0.118919000  | -1.670931000 |
| H                         | 0.000000000  | 0.754776000  | -0.480965000 | C | 0.687755000  | -1.910409000 | -1.707132000 |
| H                         | 0.000000000  | -0.754776000 | -0.480965000 | C | 2.792157000  | -0.385046000 | -2.547812000 |
| C                         |              |              |              | C | 1.607848000  | -2.453538000 | -2.591878000 |
| Free energy: -808.510313  |              |              |              | C | 2.683413000  | -1.682960000 | -3.016297000 |
| C                         | 0.035120000  | -0.016758000 | 0.720538000  | C | -0.230321000 | 1.439809000  | 0.347630000  |
| C                         | -0.306403000 | 1.390175000  | 0.231134000  | C | -0.424101000 | 2.372769000  | -0.671437000 |
| C                         | 0.269755000  | 1.930429000  | -0.920448000 | C | -0.129638000 | 1.995806000  | 1.620095000  |
| C                         | -1.276826000 | 2.128980000  | 0.915872000  | C | -0.461009000 | 3.745034000  | -0.476893000 |
| C                         | -0.111167000 | 3.192407000  | -1.376474000 | C | -0.162763000 | 3.367577000  | 1.863684000  |
| H                         | 1.021338000  | 1.366491000  | -1.463272000 | C | -0.325359000 | 4.251151000  | 0.809086000  |
| C                         | -1.650388000 | 3.392333000  | 0.466102000  | C | 0.209195000  | -1.134490000 | 1.207491000  |
| H                         | -1.740118000 | 1.710227000  | 1.802991000  | C | -0.444580000 | -2.266485000 | 1.684739000  |
| C                         | -1.068610000 | 3.929291000  | -0.683085000 | C | 1.478132000  | -0.937924000 | 1.750457000  |
| H                         | 0.347246000  | 3.599304000  | -2.273114000 | C | 0.091683000  | -3.113388000 | 2.651670000  |
| H                         | -2.400371000 | 3.957470000  | 1.012079000  | C | 2.052560000  | -1.750434000 | 2.715629000  |
| H                         | -1.361529000 | 4.914140000  | -1.034843000 | C | 1.347959000  | -2.854900000 | 3.175428000  |
| C                         | 1.428908000  | -0.454662000 | 0.266844000  | C | -1.875384000 | -0.346377000 | -0.409466000 |
| C                         | 1.667218000  | -1.594742000 | -0.500303000 | C | -2.839403000 | -0.178452000 | 0.584158000  |
| C                         | 2.521225000  | 0.314071000  | 0.692954000  | C | -2.394722000 | -0.505996000 | -1.690003000 |
| C                         | 2.971076000  | -1.954583000 | -0.848215000 | C | -4.206885000 | -0.199667000 | 0.356092000  |
| H                         | 0.838368000  | -2.210270000 | -0.831691000 | C | -3.759323000 | -0.533290000 | -1.967296000 |
| C                         | 3.819274000  | -0.041622000 | 0.345770000  | C | -4.674804000 | -0.380821000 | -0.938746000 |
| H                         | 2.344135000  | 1.198016000  | 1.297998000  | F | -4.193352000 | -0.698300000 | -3.224500000 |
| C                         | 4.049055000  | -1.180006000 | -0.430313000 | F | -1.592632000 | -0.637333000 | -2.763207000 |
| H                         | 3.138658000  | -2.845576000 | -1.446322000 | F | -5.987871000 | -0.404204000 | -1.187908000 |
| H                         | 4.653663000  | 0.568191000  | 0.679963000  | F | -5.075519000 | -0.043226000 | 1.364283000  |
| H                         | 5.062418000  | -1.459236000 | -0.703512000 | F | -2.454455000 | 0.018655000  | 1.860432000  |
| C                         | -1.065792000 | -0.964737000 | 0.234010000  | F | -1.657282000 | -2.625571000 | 1.225077000  |
| C                         | -1.741312000 | -1.797597000 | 1.125768000  | F | -0.596554000 | -4.182910000 | 3.073475000  |
| C                         | -1.411340000 | -1.006111000 | -1.122442000 | F | 1.876503000  | -3.657949000 | 4.103805000  |
| C                         | -2.738870000 | -2.662245000 | 0.672586000  | F | 3.273622000  | -1.486831000 | 3.199732000  |
| H                         | -1.497936000 | -1.766561000 | 2.182102000  | F | 2.230947000  | 0.102063000  | 1.333512000  |
| C                         | -2.402126000 | -1.871006000 | -1.576517000 | F | -0.310718000 | -2.725272000 | -1.318511000 |
| H                         | -0.901431000 | -0.356221000 | -1.827292000 | F | 1.478198000  | -3.711864000 | -3.030371000 |
| C                         | -3.071701000 | -2.704125000 | -0.678714000 | F | 3.589208000  | -2.184640000 | -3.858939000 |
| H                         | -3.256542000 | -3.301452000 | 1.382103000  | F | 3.832690000  | 0.382074000  | -2.926678000 |
| H                         | -2.655393000 | -1.890961000 | -2.632543000 | F | 2.057775000  | 1.393905000  | -1.282028000 |
| H                         | -3.848722000 | -3.375934000 | -1.031295000 | F | 0.007979000  | 1.228011000  | 2.716477000  |
| O                         | 0.043440000  | 0.061087000  | 2.149722000  | F | -0.046523000 | 3.837298000  | 3.112809000  |
| H                         | 0.406127000  | -0.773290000 | 2.478471000  | F | -0.358830000 | 5.569261000  | 1.025645000  |
| D                         |              |              |              | F | -0.629363000 | 4.582059000  | -1.509106000 |
| Free energy: -3089.304318 |              |              |              | F | -0.572402000 | 1.950193000  | -1.941900000 |

|                           |              |              |              |   |              |              |              |
|---------------------------|--------------|--------------|--------------|---|--------------|--------------|--------------|
| B                         | -0.293773000 | -0.161041000 | -0.017784000 | C | -3.865380000 | -2.957972000 | -2.256728000 |
| H                         | 4.142943000  | 2.599444000  | 0.070056000  | C | -2.828574000 | -3.230648000 | -3.140134000 |
| O                         | 3.310704000  | 2.924106000  | 0.903030000  | C | -1.238659000 | 1.005632000  | -0.100985000 |
| H                         | 3.518848000  | 2.492411000  | 1.747193000  | C | -1.051149000 | 1.762229000  | -1.259344000 |
| H                         | 2.447712000  | 2.569731000  | 0.632473000  | C | -0.398970000 | 1.364222000  | 0.947628000  |
| O                         | 4.953798000  | 2.293528000  | -0.739784000 | C | -0.089745000 | 2.752656000  | -1.396955000 |
| H                         | 5.199814000  | 3.081084000  | -1.251770000 | C | 0.567443000  | 2.361559000  | 0.865290000  |
| H                         | 4.548950000  | 1.678298000  | -1.374967000 | C | 0.728353000  | 3.062014000  | -0.317972000 |
| <b>Ia</b>                 |              |              |              | C | -2.428799000 | -1.031604000 | 1.286124000  |
| Free energy: -664.517786  |              |              |              | C | -3.410831000 | -1.250772000 | 2.247072000  |
| C                         | 1.477124000  | -1.524878000 | -0.816952000 | C | -1.307060000 | -1.845688000 | 1.423279000  |
| C                         | 2.661135000  | -0.094535000 | 0.557232000  | C | -3.265571000 | -2.153512000 | 3.298237000  |
| C                         | 1.047819000  | -1.746808000 | 0.526470000  | C | -1.108977000 | -2.744372000 | 2.458798000  |
| H                         | 2.974598000  | -0.086306000 | -1.662177000 | C | -2.103570000 | -2.900689000 | 3.414757000  |
| H                         | 1.658362000  | -0.765667000 | 2.446651000  | C | -3.768598000 | 1.023592000  | 0.023221000  |
| Fe                        | 0.721810000  | 0.192435000  | -0.014839000 | C | -3.915553000 | 1.866757000  | 1.124772000  |
| C                         | 2.474637000  | -0.503509000 | -0.797740000 | C | -4.641901000 | 1.294191000  | -1.026041000 |
| C                         | 1.779298000  | -0.863039000 | 1.375615000  | C | -4.867842000 | 2.870672000  | 1.216969000  |
| H                         | 1.086569000  | -2.016588000 | -1.698293000 | C | -5.612335000 | 2.292112000  | -0.978967000 |
| H                         | 3.326750000  | 0.687249000  | 0.899595000  | C | -5.729939000 | 3.086657000  | 0.149931000  |
| H                         | 0.274547000  | -2.435179000 | 0.841465000  | F | -6.428167000 | 2.495034000  | -2.022335000 |
| C                         | 0.197218000  | 1.853330000  | -1.082137000 | F | -4.595968000 | 0.599266000  | -2.177625000 |
| C                         | -0.631560000 | 1.317830000  | 1.002790000  | F | -6.655411000 | 4.048811000  | 0.210392000  |
| C                         | -0.773478000 | 0.822012000  | -1.246630000 | F | -4.960027000 | 3.633367000  | 2.314476000  |
| C                         | 0.283894000  | 2.161839000  | 0.309115000  | F | -3.098012000 | 1.727987000  | 2.186635000  |
| C                         | -1.284752000 | 0.477790000  | 0.045042000  | F | -4.583961000 | -0.594078000 | 2.216490000  |
| H                         | 0.793687000  | 2.295199000  | -1.869812000 | F | -4.244535000 | -2.306997000 | 4.199400000  |
| H                         | -0.782707000 | 1.280647000  | 2.074177000  | F | -1.946504000 | -3.761530000 | 4.423879000  |
| H                         | -1.040336000 | 0.347486000  | -2.181456000 | F | 0.027822000  | -3.451635000 | 2.546488000  |
| H                         | 0.958194000  | 2.877984000  | 0.760681000  | F | -0.314571000 | -1.774166000 | 0.509940000  |
| C                         | -2.339030000 | -0.537061000 | 0.369939000  | F | -4.758516000 | -1.726856000 | -0.504199000 |
| H                         | -2.077208000 | -1.001162000 | 1.332242000  | F | -4.984070000 | -3.692534000 | -2.296066000 |
| O                         | -3.568701000 | 0.191243000  | 0.521364000  | F | -2.939788000 | -4.219876000 | -4.031052000 |
| H                         | -4.247045000 | -0.456062000 | 0.756089000  | F | -0.662009000 | -2.715098000 | -3.915906000 |
| C                         | -2.485256000 | -1.623380000 | -0.683201000 | F | -0.408125000 | -0.763245000 | -2.165583000 |
| H                         | -2.767732000 | -1.189897000 | -1.647467000 | F | -0.467672000 | 0.749131000  | 2.153059000  |
| H                         | -1.551591000 | -2.177885000 | -0.809611000 | F | 1.337950000  | 2.642924000  | 1.923594000  |
| H                         | -3.265844000 | -2.330615000 | -0.384441000 | F | 1.650669000  | 4.022391000  | -0.422543000 |
| <b>E</b>                  |              |              |              | F | 0.046858000  | 3.422502000  | -2.547609000 |
| Free energy: -3753.825361 |              |              |              | F | -1.839163000 | 1.548340000  | -2.329145000 |
| C                         | -2.593644000 | -1.111462000 | -1.247431000 | B | -2.512781000 | -0.031861000 | -0.013909000 |
| C                         | -1.583979000 | -1.437554000 | -2.143557000 | O | 1.972920000  | -0.548687000 | -0.540016000 |
| C                         | -3.722243000 | -1.926935000 | -1.340562000 | H | 2.503161000  | 0.292445000  | -0.880109000 |
| C                         | -1.676921000 | -2.462724000 | -3.080077000 | H | 1.974366000  | -0.605011000 | 0.506086000  |

|                           |              |              |              |   |              |              |              |
|---------------------------|--------------|--------------|--------------|---|--------------|--------------|--------------|
| O                         | 2.013803000  | -0.749732000 | 1.953330000  | C | 0.645215000  | 2.312323000  | 0.832404000  |
| H                         | 1.273383000  | -0.238300000 | 2.313930000  | C | 0.759982000  | 3.052963000  | -0.331193000 |
| H                         | 1.056201000  | -0.495251000 | -0.858585000 | C | -2.359347000 | -1.070488000 | 1.267648000  |
| C                         | 7.806867000  | 0.597100000  | 1.648888000  | C | -3.318838000 | -1.329293000 | 2.241314000  |
| C                         | 9.157015000  | -0.412879000 | 0.069967000  | C | -1.235777000 | -1.890542000 | 1.342010000  |
| C                         | 7.952950000  | 1.498026000  | 0.550962000  | C | -3.155751000 | -2.283156000 | 3.243452000  |
| H                         | 8.614388000  | -1.469231000 | 1.970869000  | C | -1.023120000 | -2.842619000 | 2.325891000  |
| H                         | 9.059077000  | 1.288115000  | -1.386575000 | C | -1.997124000 | -3.042490000 | 3.294784000  |
| Fe                        | 7.125254000  | -0.259058000 | -0.071768000 | C | -3.723454000 | 1.044273000  | 0.135860000  |
| C                         | 8.551672000  | -0.584134000 | 1.351303000  | C | -3.813243000 | 1.848535000  | 1.272048000  |
| C                         | 8.786950000  | 0.873901000  | -0.424513000 | C | -4.632801000 | 1.366409000  | -0.867368000 |
| H                         | 7.205278000  | 0.764433000  | 2.532681000  | C | -4.741479000 | 2.865762000  | 1.436116000  |
| H                         | 9.758744000  | -1.145669000 | -0.451855000 | C | -5.582360000 | 2.378068000  | -0.746867000 |
| H                         | 7.481430000  | 2.467360000  | 0.456154000  | C | -5.640354000 | 3.134618000  | 0.412349000  |
| C                         | 5.985276000  | -1.953201000 | -0.181254000 | F | -6.435009000 | 2.631458000  | -1.749070000 |
| C                         | 6.064092000  | -0.315680000 | -1.804797000 | F | -4.645423000 | 0.712282000  | -2.043558000 |
| C                         | 5.208561000  | -0.849285000 | 0.274856000  | F | -6.544093000 | 4.110603000  | 0.542645000  |
| C                         | 6.513369000  | -1.624822000 | -1.466316000 | F | -4.776367000 | 3.590739000  | 2.562245000  |
| C                         | 5.260707000  | 0.174569000  | -0.724911000 | F | -2.959495000 | 1.656420000  | 2.296490000  |
| H                         | 6.176918000  | -2.864609000 | 0.370073000  | F | -4.486894000 | -0.663214000 | 2.271961000  |
| H                         | 6.315224000  | 0.237800000  | -2.700796000 | F | -4.114537000 | -2.474892000 | 4.159224000  |
| H                         | 4.701508000  | -0.781035000 | 1.227134000  | F | -1.823365000 | -3.954956000 | 4.254944000  |
| H                         | 7.175592000  | -2.243305000 | -2.058116000 | F | 0.110435000  | -3.560429000 | 2.351693000  |
| C                         | 4.568693000  | 1.500638000  | -0.702352000 | F | -0.257220000 | -1.770606000 | 0.419134000  |
| H                         | 5.163788000  | 2.226525000  | -1.265561000 | F | -4.786861000 | -1.666146000 | -0.414919000 |
| O                         | 3.284234000  | 1.390910000  | -1.393979000 | F | -5.144318000 | -3.573574000 | -2.245722000 |
| H                         | 3.463186000  | 1.180601000  | -2.323084000 | F | -3.206458000 | -4.083893000 | -4.104389000 |
| C                         | 4.266403000  | 2.032875000  | 0.680480000  | F | -0.899968000 | -2.620071000 | -4.071769000 |
| H                         | 3.636178000  | 1.337430000  | 1.239239000  | F | -0.517336000 | -0.725885000 | -2.281641000 |
| H                         | 5.195653000  | 2.178017000  | 1.235018000  | F | -0.345068000 | 0.662841000  | 2.106612000  |
| H                         | 3.746173000  | 2.989097000  | 0.607311000  | F | 1.460161000  | 2.557158000  | 1.867442000  |
| H                         | 1.799556000  | -1.671046000 | 2.158573000  | F | 1.681663000  | 4.015093000  | -0.438586000 |
| <b>TS1</b>                |              |              |              | F | 0.001255000  | 3.483180000  | -2.523000000 |
| Free energy: -3753.801723 |              |              |              | F | -1.890128000 | 1.614986000  | -2.288860000 |
| C                         | -2.650984000 | -1.067892000 | -1.252507000 | B | -2.486746000 | -0.027164000 | 0.006536000  |
| C                         | -1.697749000 | -1.381521000 | -2.213332000 | O | 1.991205000  | -0.422538000 | -0.839908000 |
| C                         | -3.798837000 | -1.859857000 | -1.309576000 | H | 2.637751000  | 0.931170000  | -1.575452000 |
| C                         | -1.862265000 | -2.376945000 | -3.172627000 | H | 2.088089000  | -0.481420000 | 0.137009000  |
| C                         | -4.010782000 | -2.860337000 | -2.245829000 | O | 2.193464000  | -0.838528000 | 1.886045000  |
| C                         | -3.028772000 | -3.123868000 | -3.192130000 | H | 1.482230000  | -0.285971000 | 2.238126000  |
| C                         | -1.203516000 | 0.995936000  | -0.105656000 | H | 1.038163000  | -0.417154000 | -0.994216000 |
| C                         | -1.057241000 | 1.788397000  | -1.245850000 | C | 7.491558000  | 0.548913000  | 1.801222000  |
| C                         | -0.321106000 | 1.315274000  | 0.921214000  | C | 9.001573000  | -0.445358000 | 0.364289000  |
| C                         | -0.095316000 | 2.777518000  | -1.389984000 | C | 7.815022000  | 1.485595000  | 0.771822000  |

|                           |              |              |              |    |              |              |              |
|---------------------------|--------------|--------------|--------------|----|--------------|--------------|--------------|
| H                         | 8.181001000  | -1.557170000 | 2.125667000  | C  | 5.122321000  | -1.178921000 | 1.270027000  |
| H                         | 9.140674000  | 1.310865000  | -1.022356000 | C  | 5.545358000  | -2.094964000 | 0.316169000  |
| Fe                        | 7.012376000  | -0.232234000 | -0.024798000 | C  | 0.471599000  | -0.699037000 | -1.017686000 |
| C                         | 8.234828000  | -0.642015000 | 1.551230000  | C  | 0.108087000  | -2.040452000 | -0.893117000 |
| C                         | 8.740177000  | 0.871454000  | -0.118843000 | C  | -0.249149000 | 0.002339000  | -1.978623000 |
| H                         | 6.784764000  | 0.704606000  | 2.605014000  | C  | -0.855174000 | -2.662546000 | -1.673897000 |
| H                         | 9.629480000  | -1.185155000 | -0.114017000 | C  | -1.207799000 | -0.585387000 | -2.798321000 |
| H                         | 7.386130000  | 2.472373000  | 0.656828000  | C  | -1.522431000 | -1.924003000 | -2.641316000 |
| C                         | 6.009979000  | -2.025606000 | -0.319499000 | F  | -1.851394000 | 0.146661000  | -3.720267000 |
| C                         | 6.244140000  | -0.354953000 | -1.894948000 | F  | -0.064877000 | 1.321116000  | -2.177210000 |
| C                         | 5.129357000  | -0.993471000 | 0.063705000  | F  | -2.484195000 | -2.489427000 | -3.381345000 |
| C                         | 6.689075000  | -1.637851000 | -1.517956000 | F  | -1.170374000 | -3.950516000 | -1.486249000 |
| C                         | 5.251867000  | 0.068622000  | -0.919115000 | F  | 0.705999000  | -2.812465000 | 0.033040000  |
| H                         | 6.191265000  | -2.937192000 | 0.233951000  | F  | 2.700298000  | -2.187652000 | -1.871078000 |
| H                         | 6.585976000  | 0.235684000  | -2.734039000 | F  | 5.088670000  | -3.290187000 | -1.663725000 |
| H                         | 4.498292000  | -0.975863000 | 0.940536000  | F  | 6.755971000  | -2.654974000 | 0.403671000  |
| H                         | 7.462212000  | -2.210482000 | -2.012244000 | F  | 5.933321000  | -0.849368000 | 2.284488000  |
| C                         | 4.963735000  | 1.416815000  | -0.675253000 | F  | 3.527080000  | 0.284276000  | 2.101365000  |
| H                         | 5.421476000  | 2.142110000  | -1.340595000 | F  | 2.617137000  | 0.547506000  | -2.573480000 |
| O                         | 3.102586000  | 1.681283000  | -2.034343000 | F  | 3.784638000  | 2.800085000  | -3.391007000 |
| H                         | 3.467507000  | 1.274677000  | -2.831109000 | F  | 4.015632000  | 4.930783000  | -1.693954000 |
| C                         | 4.280675000  | 1.925990000  | 0.533413000  | F  | 3.033798000  | 4.732960000  | 0.846635000  |
| H                         | 3.661547000  | 1.169969000  | 1.014125000  | F  | 1.867024000  | 2.520485000  | 1.683813000  |
| H                         | 5.039698000  | 2.262116000  | 1.250174000  | F  | 1.741527000  | -1.919253000 | 2.453585000  |
| H                         | 3.679080000  | 2.798109000  | 0.279418000  | F  | 0.151999000  | -1.858664000 | 4.560296000  |
| H                         | 1.807985000  | -1.724179000 | 1.869586000  | F  | -1.803823000 | 0.043392000  | 4.785252000  |
| <b>F</b>                  |              |              |              | F  | -2.112667000 | 1.887009000  | 2.812711000  |
| Free energy: -3524.548125 |              |              |              | F  | -0.608144000 | 1.776482000  | 0.605895000  |
| C                         | 2.132774000  | 1.413783000  | -0.418672000 | B  | 1.557672000  | -0.058517000 | 0.032194000  |
| C                         | 2.298151000  | 2.521099000  | 0.408502000  | C  | -5.299668000 | -1.076077000 | 1.421434000  |
| C                         | 2.676782000  | 1.566652000  | -1.694245000 | C  | -3.999732000 | -2.011942000 | -0.239167000 |
| C                         | 2.916614000  | 3.700448000  | 0.000351000  | C  | -3.949778000 | -0.648895000 | 1.607257000  |
| C                         | 3.297944000  | 2.721883000  | -2.145070000 | H  | -6.204308000 | -2.379898000 | -0.154529000 |
| C                         | 3.419611000  | 3.805997000  | -1.286154000 | H  | -2.090287000 | -1.039229000 | 0.424802000  |
| C                         | 0.693189000  | -0.034810000 | 1.427063000  | Fe | -4.652366000 | -0.078386000 | -0.248749000 |
| C                         | -0.345637000 | 0.882923000  | 1.581675000  | C  | -5.324538000 | -1.928882000 | 0.284010000  |
| C                         | 0.809208000  | -0.949998000 | 2.469860000  | C  | -3.145872000 | -1.215768000 | 0.577474000  |
| C                         | -1.151603000 | 0.954336000  | 2.706432000  | H  | -6.149305000 | -0.776012000 | 2.019011000  |
| C                         | -0.009350000 | -0.942456000 | 3.596883000  | H  | -3.718555000 | -2.544157000 | -1.135992000 |
| C                         | -0.997346000 | 0.019814000  | 3.720310000  | H  | -3.610078000 | 0.016298000  | 2.385849000  |
| C                         | 2.957685000  | -0.912708000 | 0.134270000  | C  | -5.948129000 | 0.238662000  | -1.863567000 |
| C                         | 3.436042000  | -1.821805000 | -0.804684000 | C  | -3.887199000 | 1.241606000  | -1.596807000 |
| C                         | 3.862029000  | -0.612037000 | 1.152840000  | C  | -6.118141000 | 1.203243000  | -0.856440000 |
| C                         | 4.693718000  | -2.415312000 | -0.728469000 | C  | -4.590898000 | 0.263531000  | -2.317413000 |

|                           |              |              |              |    |              |              |              |
|---------------------------|--------------|--------------|--------------|----|--------------|--------------|--------------|
| C                         | -4.821488000 | 1.836380000  | -0.644540000 | C  | -1.846218000 | -0.989211000 | 2.570575000  |
| H                         | -6.700746000 | -0.462248000 | -2.198575000 | C  | -0.025848000 | -0.007851000 | 1.474018000  |
| H                         | -2.836471000 | 1.484093000  | -1.660561000 | C  | -1.042737000 | -1.282853000 | 3.670677000  |
| H                         | -7.016833000 | 1.384086000  | -0.284468000 | C  | 0.796663000  | -0.235950000 | 2.563905000  |
| H                         | -4.173130000 | -0.414075000 | -3.046981000 | C  | 0.290026000  | -0.903897000 | 3.669890000  |
| C                         | -4.357937000 | 2.054995000  | 0.653792000  | C  | -3.850095000 | -0.118694000 | 0.244317000  |
| H                         | -3.285137000 | 2.185865000  | 0.768400000  | C  | -4.459947000 | 0.645923000  | 1.238317000  |
| C                         | -5.204847000 | 2.408390000  | 1.819377000  | C  | -4.738506000 | -0.769055000 | -0.606438000 |
| H                         | -6.252053000 | 2.133259000  | 1.690082000  | C  | -5.832314000 | 0.743047000  | 1.414124000  |
| H                         | -4.818733000 | 1.960480000  | 2.737501000  | C  | -6.122530000 | -0.700038000 | -0.468896000 |
| H                         | -5.146158000 | 3.497449000  | 1.952824000  | C  | -6.676509000 | 0.059323000  | 0.549142000  |
| <b>2a</b>                 |              |              |              | F  | -6.923381000 | -1.357756000 | -1.318551000 |
| Free energy: -669.598165  |              |              |              | F  | -4.304551000 | -1.514435000 | -1.639958000 |
| C                         | 0.651655000  | -1.205363000 | 0.259365000  | F  | -8.003050000 | 0.136866000  | 0.694491000  |
| C                         | -0.023960000 | 0.000493000  | 0.475235000  | F  | -6.349283000 | 1.489229000  | 2.399655000  |
| C                         | 0.652362000  | 1.205787000  | 0.258723000  | F  | -3.700597000 | 1.351841000  | 2.098796000  |
| C                         | 1.981980000  | 1.206267000  | -0.157926000 | F  | -3.125378000 | -1.391946000 | 2.673396000  |
| C                         | 2.649270000  | -0.000553000 | -0.367936000 | F  | -1.549459000 | -1.929986000 | 4.728524000  |
| C                         | 1.981241000  | -1.206886000 | -0.157235000 | F  | 1.081775000  | -1.178276000 | 4.710723000  |
| C                         | -1.463194000 | 0.000914000  | 0.899280000  | F  | 2.082203000  | 0.150750000  | 2.558545000  |
| S                         | -2.525479000 | -0.000184000 | -0.610862000 | F  | 0.544402000  | 0.580363000  | 0.404585000  |
| H                         | 0.130328000  | -2.144922000 | 0.423583000  | F  | -2.735181000 | -2.851095000 | 0.329006000  |
| H                         | 0.131651000  | 2.145769000  | 0.422459000  | F  | -1.649505000 | -4.861764000 | -1.045041000 |
| H                         | 2.497608000  | 2.148841000  | -0.317470000 | F  | 0.132764000  | -4.353880000 | -3.058776000 |
| H                         | 3.685976000  | -0.000964000 | -0.691542000 | F  | 0.793762000  | -1.775455000 | -3.641170000 |
| H                         | 2.496323000  | -2.149853000 | -0.316217000 | F  | -0.286114000 | 0.240682000  | -2.319492000 |
| H                         | -1.697483000 | -0.888722000 | 1.487322000  | F  | -1.161611000 | 2.470603000  | 1.510292000  |
| H                         | -1.697342000 | 0.891388000  | 1.486093000  | F  | -1.033392000 | 4.886609000  | 0.478645000  |
| H                         | -3.715519000 | -0.002547000 | 0.022531000  | F  | -1.884810000 | 5.377689000  | -2.072666000 |
| <b>TS2</b>                |              |              |              | F  | -2.871046000 | 3.316826000  | -3.575001000 |
| Free energy: -4194.137880 |              |              |              | F  | -2.990164000 | 0.850489000  | -2.566374000 |
| C                         | -1.608246000 | -1.190722000 | -0.934743000 | B  | -2.223122000 | -0.035557000 | 0.060471000  |
| C                         | -0.692414000 | -0.995867000 | -1.962626000 | C  | 1.936754000  | -2.879989000 | 0.181298000  |
| C                         | -1.884467000 | -2.532109000 | -0.664120000 | C  | 3.925764000  | -3.906270000 | -0.395532000 |
| C                         | -0.108987000 | -2.034051000 | -2.683693000 | C  | 2.857492000  | -2.687340000 | 1.250937000  |
| C                         | -1.334685000 | -3.599251000 | -1.360016000 | H  | 2.182756000  | -3.901963000 | -1.798526000 |
| C                         | -0.437298000 | -3.346000000 | -2.388448000 | H  | 4.996988000  | -3.315089000 | 1.476099000  |
| C                         | -2.035261000 | 1.500135000  | -0.495745000 | Fe | 3.590263000  | -1.884242000 | -0.477365000 |
| C                         | -2.484899000 | 1.818398000  | -1.776981000 | C  | 2.598175000  | -3.627535000 | -0.839593000 |
| C                         | -1.583913000 | 2.594684000  | 0.236427000  | C  | 4.085465000  | -3.326126000 | 0.892791000  |
| C                         | -2.440134000 | 3.091332000  | -2.326656000 | H  | 0.935502000  | -2.474672000 | 0.126940000  |
| C                         | -1.516508000 | 3.888152000  | -0.273221000 | H  | 4.690881000  | -4.420240000 | -0.961852000 |
| C                         | -1.943672000 | 4.142284000  | -1.566477000 | H  | 2.679740000  | -2.127993000 | 2.157239000  |
| C                         | -1.381238000 | -0.329045000 | 1.437763000  | C  | 2.871846000  | -0.302234000 | -1.609433000 |

|                           |              |              |              |    |              |              |              |
|---------------------------|--------------|--------------|--------------|----|--------------|--------------|--------------|
| C                         | 5.050023000  | -1.058093000 | -1.625880000 | C  | -1.353139000 | -0.354338000 | 1.432804000  |
| C                         | 3.455313000  | 0.135619000  | -0.406159000 | C  | -1.799362000 | -1.056333000 | 2.548077000  |
| C                         | 3.843170000  | -1.040026000 | -2.355410000 | C  | -0.008171000 | 0.007573000  | 1.479993000  |
| C                         | 4.832499000  | -0.304582000 | -0.402643000 | C  | -0.988944000 | -1.353673000 | 3.641911000  |
| H                         | 1.849194000  | -0.131860000 | -1.902461000 | C  | 0.818661000  | -0.222132000 | 2.566591000  |
| H                         | 5.970909000  | -1.557224000 | -1.896099000 | C  | 0.331312000  | -0.933825000 | 3.653716000  |
| H                         | 2.969390000  | 0.696539000  | 0.373451000  | C  | -3.828959000 | -0.182737000 | 0.250059000  |
| H                         | 3.660791000  | -1.548426000 | -3.292337000 | C  | -4.451837000 | 0.548461000  | 1.261035000  |
| C                         | 5.682010000  | -0.350431000 | 0.710996000  | C  | -4.706336000 | -0.838239000 | -0.608221000 |
| H                         | 6.611551000  | -0.901434000 | 0.586511000  | C  | -5.825191000 | 0.609829000  | 1.445109000  |
| C                         | 5.284821000  | 0.003484000  | 2.090997000  | C  | -6.090899000 | -0.804580000 | -0.462849000 |
| H                         | 4.512929000  | 0.771553000  | 2.126533000  | C  | -6.657568000 | -0.077642000 | 0.571731000  |
| H                         | 4.878157000  | -0.906019000 | 2.554191000  | F  | -6.880276000 | -1.465538000 | -1.320736000 |
| H                         | 6.149700000  | 0.301552000  | 2.686112000  | F  | -4.260663000 | -1.554724000 | -1.657067000 |
| S                         | 7.017616000  | 1.908097000  | 0.186154000  | F  | -7.984828000 | -0.034357000 | 0.724845000  |
| C                         | 4.560632000  | 3.182698000  | 0.367408000  | F  | -6.354312000 | 1.324939000  | 2.447146000  |
| C                         | 4.416028000  | 3.262009000  | -1.022088000 | F  | -3.705326000 | 1.255619000  | 2.131702000  |
| C                         | 3.148270000  | 3.311756000  | -1.598328000 | F  | -3.066596000 | -1.498052000 | 2.639631000  |
| C                         | 2.008376000  | 3.299095000  | -0.794494000 | F  | -1.477491000 | -2.041981000 | 4.682286000  |
| C                         | 2.142941000  | 3.244430000  | 0.592176000  | F  | 1.129843000  | -1.210297000 | 4.688916000  |
| C                         | 3.411985000  | 3.177864000  | 1.167358000  | F  | 2.091358000  | 0.204305000  | 2.575991000  |
| C                         | 5.915664000  | 3.125896000  | 1.020246000  | F  | 0.545905000  | 0.638368000  | 0.426795000  |
| H                         | 7.997540000  | 1.935221000  | 1.112034000  | F  | -2.660449000 | -2.890464000 | 0.270739000  |
| H                         | 5.295704000  | 3.275425000  | -1.660341000 | F  | -1.541421000 | -4.847865000 | -1.152047000 |
| H                         | 3.051325000  | 3.356018000  | -2.679206000 | F  | 0.227171000  | -4.260988000 | -3.155411000 |
| H                         | 1.021922000  | 3.316924000  | -1.247390000 | F  | 0.846791000  | -1.658159000 | -3.673075000 |
| H                         | 1.260592000  | 3.231594000  | 1.222455000  | F  | -0.270214000 | 0.306935000  | -2.304933000 |
| H                         | 3.515065000  | 3.113299000  | 2.247268000  | F  | -1.208498000 | 2.455776000  | 1.546461000  |
| H                         | 6.421607000  | 4.094733000  | 0.969050000  | F  | -1.147300000 | 4.888685000  | 0.549080000  |
| H                         | 5.823272000  | 2.840955000  | 2.069876000  | F  | -2.012959000 | 5.392496000  | -1.994677000 |
| <b>G</b>                  |              |              |              | F  | -2.943281000 | 3.326500000  | -3.526034000 |
| Free energy: -4194.151776 |              |              |              | F  | -2.995766000 | 0.844811000  | -2.552190000 |
| C                         | -1.564641000 | -1.180467000 | -0.954150000 | B  | -2.204580000 | -0.057933000 | 0.061936000  |
| C                         | -0.650783000 | -0.944767000 | -1.975508000 | C  | 1.968031000  | -2.845662000 | 0.166944000  |
| C                         | -1.816057000 | -2.532459000 | -0.714556000 | C  | 3.973573000  | -3.818351000 | -0.442761000 |
| C                         | -0.048370000 | -1.955093000 | -2.719974000 | C  | 2.904175000  | -2.628236000 | 1.221446000  |
| C                         | -1.248071000 | -3.572705000 | -1.435937000 | H  | 2.204349000  | -3.881601000 | -1.808722000 |
| C                         | -0.356241000 | -3.279045000 | -2.458207000 | H  | 5.063488000  | -3.195966000 | 1.412884000  |
| C                         | -2.057941000 | 1.490203000  | -0.472130000 | Fe | 3.589394000  | -1.814416000 | -0.521661000 |
| C                         | -2.516565000 | 1.814399000  | -1.748762000 | C  | 2.629976000  | -3.583071000 | -0.861483000 |
| C                         | -1.635746000 | 2.586231000  | 0.274995000  | C  | 4.143743000  | -3.226352000 | 0.843177000  |
| C                         | -2.506533000 | 3.095600000  | -2.280677000 | H  | 0.951622000  | -2.476570000 | 0.135362000  |
| C                         | -1.604746000 | 3.888102000  | -0.216306000 | H  | 4.740459000  | -4.318319000 | -1.019936000 |
| C                         | -2.038766000 | 4.148927000  | -1.505922000 | H  | 2.725869000  | -2.071785000 | 2.129676000  |

|                           |             |              |              |    |              |              |              |
|---------------------------|-------------|--------------|--------------|----|--------------|--------------|--------------|
| C                         | 2.916269000 | -0.207111000 | -1.600915000 | C  | 0.949603000  | -2.747656000 | 3.416904000  |
| C                         | 5.101845000 | -0.940814000 | -1.569165000 | C  | 3.780028000  | 0.070651000  | -0.248421000 |
| C                         | 3.490371000 | 0.208109000  | -0.371753000 | C  | 4.510757000  | -0.194750000 | -1.400806000 |
| C                         | 3.905611000 | -0.921362000 | -2.339660000 | C  | 4.495659000  | 0.725102000  | 0.753561000  |
| C                         | 4.846045000 | -0.241288000 | -0.344301000 | C  | 5.855843000  | 0.135632000  | -1.547603000 |
| H                         | 1.898384000 | -0.027486000 | -1.905634000 | C  | 5.833814000  | 1.073349000  | 0.652300000  |
| H                         | 6.032793000 | -1.427257000 | -1.830889000 | C  | 6.524358000  | 0.773640000  | -0.515091000 |
| H                         | 2.985641000 | 0.743183000  | 0.413974000  | C  | 1.471633000  | -1.085802000 | -1.215071000 |
| H                         | 3.758833000 | -1.405151000 | -3.296082000 | C  | 1.885279000  | -2.415227000 | -1.337011000 |
| C                         | 5.844952000 | 0.002933000  | 0.730412000  | C  | 0.359044000  | -0.778643000 | -1.985997000 |
| H                         | 6.671084000 | -0.710679000 | 0.638833000  | C  | 1.240910000  | -3.368715000 | -2.111311000 |
| C                         | 5.332250000 | 0.064593000  | 2.152537000  | C  | -0.326950000 | -1.696353000 | -2.775762000 |
| H                         | 4.521503000 | 0.784637000  | 2.264517000  | C  | 0.112577000  | -3.007251000 | -2.836706000 |
| H                         | 4.944673000 | -0.924160000 | 2.407751000  | F  | -1.413727000 | -1.324733000 | -3.464827000 |
| H                         | 6.133593000 | 0.310174000  | 2.854077000  | F  | -0.162157000 | 0.475771000  | -2.020921000 |
| S                         | 6.738537000 | 1.598228000  | 0.256241000  | F  | -0.537049000 | -3.907995000 | -3.579218000 |
| C                         | 4.461096000 | 3.184500000  | 0.351749000  | F  | 1.690601000  | -4.627783000 | -2.164721000 |
| C                         | 4.336042000 | 3.344566000  | -1.032210000 | F  | 2.968948000  | -2.839504000 | -0.660832000 |
| C                         | 3.075504000 | 3.479701000  | -1.607478000 | F  | 3.944760000  | -0.784668000 | -2.469990000 |
| C                         | 1.933346000 | 3.475496000  | -0.805360000 | F  | 6.505860000  | -0.149319000 | -2.684301000 |
| C                         | 2.055126000 | 3.346605000  | 0.577215000  | F  | 7.814772000  | 1.098682000  | -0.640103000 |
| C                         | 3.315508000 | 3.191359000  | 1.153019000  | F  | 6.464065000  | 1.691580000  | 1.659992000  |
| C                         | 5.803479000 | 3.005992000  | 0.996267000  | F  | 3.881800000  | 1.045740000  | 1.909615000  |
| H                         | 7.730372000 | 1.557459000  | 1.178965000  | F  | 2.316579000  | 1.699004000  | -2.215116000 |
| H                         | 5.220871000 | 3.351401000  | -1.663830000 | F  | 1.648400000  | 4.282897000  | -2.232033000 |
| H                         | 2.984342000 | 3.586845000  | -2.684116000 | F  | 0.531707000  | 5.433927000  | -0.017169000 |
| H                         | 0.951541000 | 3.565989000  | -1.259424000 | F  | 0.132301000  | 3.923037000  | 2.219861000  |
| H                         | 1.169650000 | 3.343928000  | 1.202734000  | F  | 0.853725000  | 1.392519000  | 2.296966000  |
| H                         | 3.412738000 | 3.061551000  | 2.227081000  | F  | 4.022971000  | -1.766844000 | 1.847580000  |
| H                         | 6.473572000 | 3.853275000  | 0.816510000  | F  | 3.202820000  | -3.299335000 | 3.828071000  |
| H                         | 5.729234000 | 2.831897000  | 2.070108000  | F  | 0.545140000  | -3.538851000 | 4.413501000  |
| <b>TS3</b>                |             |              |              | F  | -1.283883000 | -2.159501000 | 2.938382000  |
| Free energy: -4270.575325 |             |              |              | F  | -0.476531000 | -0.585353000 | 0.914677000  |
| C                         | 1.606203000 | 1.384615000  | 0.024666000  | B  | 2.172074000  | -0.160037000 | -0.042551000 |
| C                         | 1.073367000 | 2.036150000  | 1.134902000  | C  | -4.661701000 | -3.875867000 | -1.124116000 |
| C                         | 1.794750000 | 2.211930000  | -1.084536000 | C  | -2.570858000 | -3.282715000 | -0.337628000 |
| C                         | 0.707946000 | 3.380153000  | 1.137387000  | C  | -4.744236000 | -3.748657000 | 0.295389000  |
| C                         | 1.459150000 | 3.558307000  | -1.121901000 | H  | -2.941372000 | -3.562210000 | -2.528306000 |
| C                         | 0.902470000 | 4.150610000  | 0.003785000  | H  | -3.194878000 | -3.175687000 | 1.808849000  |
| C                         | 1.812150000 | -1.045571000 | 1.297719000  | Fe | -4.131863000 | -1.989986000 | -0.545000000 |
| C                         | 0.472396000 | -1.231561000 | 1.629672000  | C  | -3.318868000 | -3.587676000 | -1.515408000 |
| C                         | 2.697849000 | -1.787056000 | 2.073594000  | C  | -3.452349000 | -3.383283000 | 0.780030000  |
| C                         | 0.024410000 | -2.042262000 | 2.659161000  | H  | -5.480909000 | -4.112423000 | -1.790694000 |
| C                         | 2.295627000 | -2.616725000 | 3.118034000  | H  | -1.532826000 | -2.978477000 | -0.303843000 |

|                           |              |              |              |    |              |              |              |
|---------------------------|--------------|--------------|--------------|----|--------------|--------------|--------------|
| H                         | -5.636763000 | -3.870696000 | 0.895193000  | C  | 0.468292000  | -1.255726000 | 1.618119000  |
| C                         | -5.490385000 | -0.651533000 | -1.306611000 | C  | 2.694070000  | -1.816235000 | 2.055738000  |
| C                         | -3.276276000 | -0.202042000 | -0.854859000 | C  | 0.021282000  | -2.073506000 | 2.642604000  |
| C                         | -5.358405000 | -0.479377000 | 0.102056000  | C  | 2.292540000  | -2.653600000 | 3.094236000  |
| C                         | -4.206515000 | -0.467117000 | -1.899544000 | C  | 0.946841000  | -2.785210000 | 3.393950000  |
| C                         | -3.985214000 | -0.200130000 | 0.390658000  | C  | 3.775704000  | 0.051097000  | -0.256135000 |
| H                         | -6.401331000 | -0.910632000 | -1.830083000 | C  | 4.498902000  | -0.218165000 | -1.412271000 |
| H                         | -2.211372000 | -0.093447000 | -0.970193000 | C  | 4.502917000  | 0.691991000  | 0.746200000  |
| H                         | -6.149040000 | -0.586605000 | 0.832000000  | C  | 5.847484000  | 0.095866000  | -1.562566000 |
| H                         | -3.968852000 | -0.568729000 | -2.949462000 | C  | 5.844953000  | 1.023948000  | 0.641580000  |
| C                         | -3.371560000 | -0.026008000 | 1.740303000  | C  | 6.527514000  | 0.720914000  | -0.529656000 |
| H                         | -2.450283000 | -0.602196000 | 1.793245000  | C  | 1.449941000  | -1.065762000 | -1.226032000 |
| C                         | -4.268125000 | -0.402120000 | 2.906699000  | C  | 1.836944000  | -2.402685000 | -1.356394000 |
| H                         | -5.164131000 | 0.222162000  | 2.955650000  | C  | 0.347730000  | -0.732022000 | -2.000046000 |
| H                         | -4.587671000 | -1.440824000 | 2.783957000  | C  | 1.174219000  | -3.338416000 | -2.136774000 |
| H                         | -3.727656000 | -0.316313000 | 3.852164000  | C  | -0.356317000 | -1.630020000 | -2.796501000 |
| S                         | -2.707841000 | 1.692137000  | 1.990485000  | C  | 0.055498000  | -2.949559000 | -2.862770000 |
| C                         | -4.040685000 | 3.671603000  | 0.626399000  | F  | -1.430365000 | -1.231431000 | -3.489733000 |
| C                         | -3.183389000 | 4.774976000  | 0.708514000  | F  | -0.143075000 | 0.537387000  | -2.037505000 |
| C                         | -2.925334000 | 5.550805000  | -0.419108000 | F  | -0.609629000 | -3.831885000 | -3.613480000 |
| C                         | -3.526448000 | 5.234647000  | -1.637973000 | F  | 1.598406000  | -4.605685000 | -2.197140000 |
| C                         | -4.391313000 | 4.142110000  | -1.724321000 | F  | 2.912365000  | -2.852568000 | -0.684037000 |
| C                         | -4.645464000 | 3.360148000  | -0.596872000 | F  | 3.921586000  | -0.795897000 | -2.482138000 |
| C                         | -4.206324000 | 2.756772000  | 1.800135000  | F  | 6.489667000  | -0.191967000 | -2.702964000 |
| H                         | -2.051895000 | 2.022207000  | 0.482385000  | F  | 7.821434000  | 1.030343000  | -0.657880000 |
| H                         | -2.691956000 | 5.004450000  | 1.650566000  | F  | 6.486655000  | 1.629327000  | 1.649824000  |
| H                         | -2.244367000 | 6.393325000  | -0.349287000 | F  | 3.897619000  | 1.012997000  | 1.906627000  |
| H                         | -3.320036000 | 5.835126000  | -2.518858000 | F  | 2.339315000  | 1.735527000  | -2.176642000 |
| H                         | -4.863312000 | 3.892920000  | -2.670076000 | F  | 1.678236000  | 4.320526000  | -2.152143000 |
| H                         | -5.299212000 | 2.494775000  | -0.665232000 | F  | 0.550545000  | 5.435708000  | 0.075693000  |
| H                         | -4.313722000 | 3.299596000  | 2.740686000  | F  | 0.140799000  | 3.889947000  | 2.285864000  |
| H                         | -5.059808000 | 2.087539000  | 1.674167000  | F  | 0.852177000  | 1.354207000  | 2.321531000  |
| O                         | -1.601640000 | 2.447291000  | -0.621091000 | F  | 4.018864000  | -1.797625000 | 1.827023000  |
| H                         | -1.005189000 | 1.775344000  | -0.997125000 | F  | 3.200103000  | -3.343205000 | 3.797212000  |
| H                         | -2.349228000 | 2.542018000  | -1.237976000 | F  | 0.542887000  | -3.583429000 | 4.385236000  |
| <b>H</b>                  |              |              |              | F  | -1.286406000 | -2.191194000 | 2.923668000  |
| Free energy: -4270.575970 |              |              |              | F  | -0.480237000 | -0.604306000 | 0.909224000  |
| C                         | 1.612237000  | 1.382349000  | 0.052490000  | B  | 2.166935000  | -0.165224000 | -0.042611000 |
| C                         | 1.073085000  | 2.015425000  | 1.170690000  | C  | -4.687464000 | -3.868066000 | -1.111720000 |
| C                         | 1.812062000  | 2.229350000  | -1.039986000 | C  | -2.590773000 | -3.297361000 | -0.323555000 |
| C                         | 0.711389000  | 3.360754000  | 1.194508000  | C  | -4.770260000 | -3.737232000 | 0.307447000  |
| C                         | 1.478608000  | 3.576816000  | -1.056650000 | H  | -2.961576000 | -3.577312000 | -2.514226000 |
| C                         | 0.914161000  | 4.150186000  | 0.075124000  | H  | -3.216907000 | -3.179228000 | 1.822247000  |
| C                         | 1.808214000  | -1.067355000 | 1.287238000  | Fe | -4.136333000 | -1.987577000 | -0.535033000 |

|   |              |              |              |    |              |              |              |
|---|--------------|--------------|--------------|----|--------------|--------------|--------------|
| C | -3.340829000 | -3.595956000 | -1.501790000 | H  | 4.699599000  | 0.965208000  | 0.799077000  |
| C | -3.474812000 | -3.385585000 | 0.793345000  | H  | 1.081657000  | 2.595452000  | -1.027041000 |
| H | -5.508372000 | -4.097091000 | -1.778873000 | Fe | 2.177413000  | 0.173933000  | -0.146961000 |
| H | -1.549192000 | -3.005024000 | -0.289862000 | C  | 3.680573000  | 1.300579000  | 0.655918000  |
| H | -5.664782000 | -3.848519000 | 0.906422000  | C  | 1.767946000  | 2.165192000  | -0.309342000 |
| C | -5.469507000 | -0.634618000 | -1.309980000 | H  | 2.673256000  | 0.682985000  | 2.561416000  |
| C | -3.256619000 | -0.209667000 | -0.832502000 | H  | 3.715398000  | 2.146108000  | -1.420070000 |
| C | -5.350038000 | -0.460769000 | 0.100429000  | H  | 0.437283000  | 1.688673000  | 1.428189000  |
| C | -4.177061000 | -0.465959000 | -1.888954000 | C  | 2.956853000  | -1.637170000 | -0.681572000 |
| C | -3.978087000 | -0.195396000 | 0.404727000  | C  | 0.984721000  | -0.761792000 | -1.497417000 |
| H | -6.377845000 | -0.883678000 | -1.842923000 | C  | 1.955481000  | -1.798248000 | 0.321789000  |
| H | -2.188341000 | -0.113305000 | -0.931676000 | C  | 2.355188000  | -1.000070000 | -1.808638000 |
| H | -6.150306000 | -0.557423000 | 0.821437000  | C  | 0.731287000  | -1.250099000 | -0.175498000 |
| H | -3.928691000 | -0.573005000 | -2.935701000 | H  | 3.997977000  | -1.918226000 | -0.589807000 |
| C | -3.376193000 | -0.003913000 | 1.760019000  | H  | 0.258326000  | -0.266048000 | -2.128417000 |
| H | -2.465953000 | -0.596593000 | 1.827090000  | H  | 2.107927000  | -2.216167000 | 1.307688000  |
| C | -4.293232000 | -0.369848000 | 2.914540000  | H  | 2.860616000  | -0.711567000 | -2.721185000 |
| H | -5.181445000 | 0.266864000  | 2.951385000  | C  | -0.575314000 | -1.136545000 | 0.545344000  |
| H | -4.626676000 | -1.405343000 | 2.795336000  | H  | -0.996829000 | -0.151273000 | 0.324396000  |
| H | -3.763712000 | -0.283823000 | 3.866176000  | S  | -1.750009000 | -2.335925000 | -0.218102000 |
| S | -2.685297000 | 1.701280000  | 1.977407000  | C  | -3.343769000 | -1.635018000 | 0.370468000  |
| C | -3.998555000 | 3.691694000  | 0.621997000  | H  | -4.104904000 | -2.216296000 | -0.158549000 |
| C | -3.134100000 | 4.789511000  | 0.711903000  | H  | -3.455995000 | -1.825818000 | 1.440788000  |
| C | -2.861454000 | 5.568452000  | -0.410646000 | C  | -0.470789000 | -1.317986000 | 2.050631000  |
| C | -3.452339000 | 5.260569000  | -1.636474000 | H  | -1.447221000 | -1.192754000 | 2.525438000  |
| C | -4.322420000 | 4.172392000  | -1.733332000 | H  | -0.093460000 | -2.312806000 | 2.303795000  |
| C | -4.594031000 | 3.390020000  | -0.609145000 | H  | 0.208573000  | -0.570593000 | 2.473639000  |
| C | -4.175822000 | 2.773456000  | 1.792406000  | C  | -3.465427000 | -0.169523000 | 0.072701000  |
| H | -1.943083000 | 2.109016000  | 0.220577000  | C  | -3.369297000 | 0.770135000  | 1.104217000  |
| H | -2.648213000 | 5.012760000  | 1.658308000  | C  | -3.608143000 | 0.285066000  | -1.244348000 |
| H | -2.175557000 | 6.406126000  | -0.331376000 | C  | -3.412312000 | 2.137596000  | 0.828259000  |
| H | -3.234035000 | 5.861960000  | -2.513782000 | H  | -3.254368000 | 0.424969000  | 2.128376000  |
| H | -4.787166000 | 3.928209000  | -2.684019000 | C  | -3.655037000 | 1.648307000  | -1.521897000 |
| H | -5.253976000 | 2.530041000  | -0.686959000 | H  | -3.672347000 | -0.438168000 | -2.053233000 |
| H | -4.293660000 | 3.321094000  | 2.729330000  | C  | -3.552918000 | 2.580200000  | -0.485719000 |
| H | -5.037473000 | 2.116295000  | 1.657211000  | H  | -3.332434000 | 2.854586000  | 1.640475000  |
| O | -1.592949000 | 2.473742000  | -0.696644000 | H  | -3.770205000 | 1.986892000  | -2.547753000 |
| H | -0.988575000 | 1.813450000  | -1.094458000 | H  | -3.584637000 | 3.643786000  | -0.703806000 |
| H | -2.352706000 | 2.603304000  | -1.299741000 |    |              |              |              |

3

Free energy: -1257.707997

|   |             |             |              |
|---|-------------|-------------|--------------|
| C | 2.609587000 | 1.153159000 | 1.588782000  |
| C | 3.160124000 | 1.925354000 | -0.517638000 |
| C | 1.427779000 | 1.688133000 | 0.991825000  |

## 6. X-ray Crystallographic Data

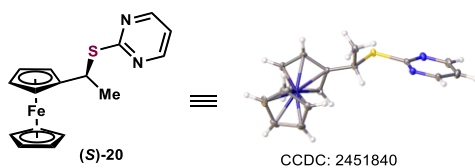

ORTEP drawing of compound (S)-20 with 50% thermal ellipsoids.

**Crystal sample preparation:** compound (S)-20 (10 mg) was added to a 10 mL glass vial and dissolved by the addition of methanol (2 mL). Stuff the bottle mouth with an absorbent cotton, place at room temperature for 3 days, a colorless crystal of (S)-20 was obtained for X-ray analysis.

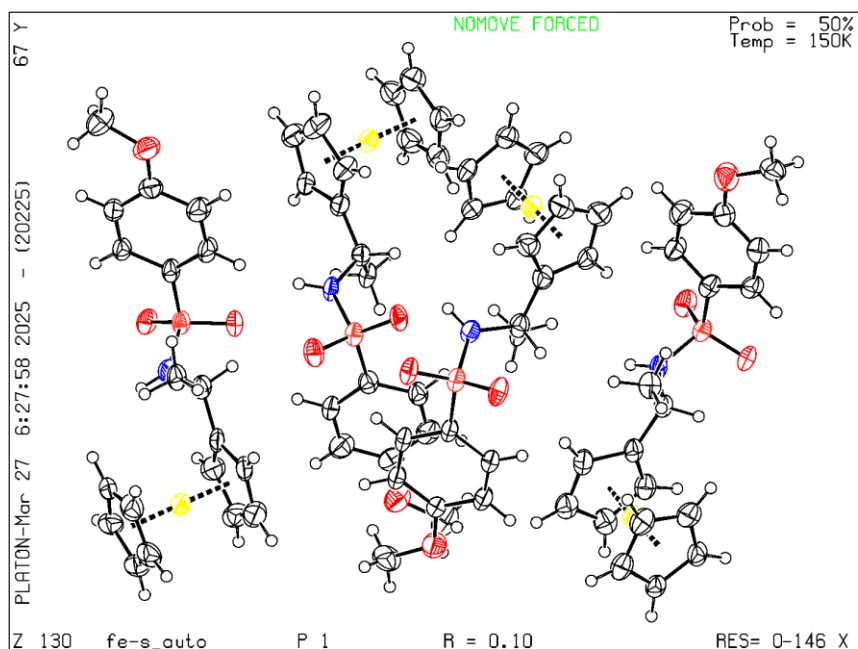

|                     |                                                     |
|---------------------|-----------------------------------------------------|
| Identification code | CCDC: 2451840                                       |
| Empirical formula   | C <sub>19</sub> H <sub>21</sub> FeNO <sub>3</sub> S |
| Formula weight      | 399.28                                              |
| Temperature/K       | 150.00(10)                                          |
| Crystal system      | triclinic                                           |
| Space group         | P1                                                  |
| a/Å                 | 7.5160(3)                                           |
| b/Å                 | 14.8861(8)                                          |

|                                             |                                                                 |
|---------------------------------------------|-----------------------------------------------------------------|
| c/Å                                         | 17.0616(7)                                                      |
| $\alpha$ /°                                 | 68.584(4)                                                       |
| $\beta$ /°                                  | 89.263(3)                                                       |
| $\gamma$ /°                                 | 80.833(4)                                                       |
| Volume/Å <sup>3</sup>                       | 1752.29(14)                                                     |
| Z                                           | 4                                                               |
| $\rho_{\text{calc}}$ /cm <sup>3</sup>       | 1.513                                                           |
| $\mu$ /mm <sup>-1</sup>                     | 8.167                                                           |
| F(000)                                      | 832.0                                                           |
| Crystal size/mm <sup>3</sup>                | 0.15 × 0.12 × 0.1                                               |
| Radiation                                   | Cu K $\alpha$ ( $\lambda$ = 1.54184)                            |
| 2 $\Theta$ range for data collection/°      | 9.976 to 146.088                                                |
| Index ranges                                | -8 ≤ h ≤ 5, -18 ≤ k ≤ 18, -21 ≤ l ≤ 20                          |
| Reflections collected                       | 37770                                                           |
| Independent reflections                     | 10087 [ $R_{\text{int}}$ = 0.0729, $R_{\text{sigma}}$ = 0.0740] |
| Data/restraints/parameters                  | 10087/1068/918                                                  |
| Goodness-of-fit on F <sup>2</sup>           | 1.093                                                           |
| Final R indexes [ $I \geq 2\sigma(I)$ ]     | $R_1$ = 0.0978, $wR_2$ = 0.2553                                 |
| Final R indexes [all data]                  | $R_1$ = 0.1213, $wR_2$ = 0.2771                                 |
| Largest diff. peak/hole / e Å <sup>-3</sup> | 2.18/-0.97                                                      |
| Flack parameter                             | -0.016(9)                                                       |

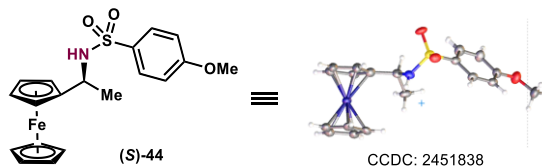

ORTEP drawing of compound (S)-44 with 50% thermal ellipsoids.

**Crystal sample preparation:** compound (S)-44 (10 mg) was added to a 10 mL glass vial and dissolved by the addition of methanol (2 mL). Stuff the bottle mouth with an absorbent cotton, place at room temperature for 3 days, a colorless crystal of (S)-44 was obtained for X-ray analysis.

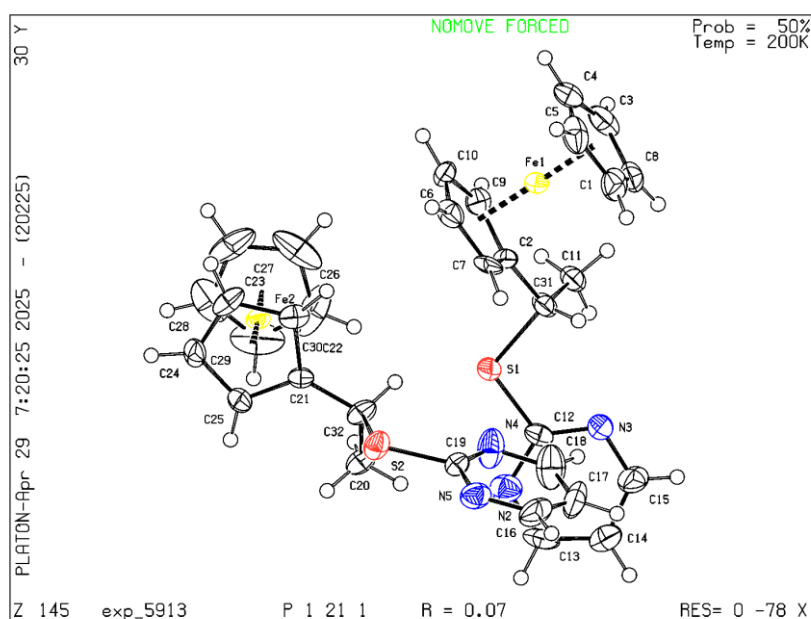

|                     |                                                    |
|---------------------|----------------------------------------------------|
| Identification code | CCDC: 2451838                                      |
| Empirical formula   | C <sub>16</sub> H <sub>16</sub> FeN <sub>2</sub> S |
| Formula weight      | 324.22                                             |
| Temperature/K       | 200.00(10)                                         |
| Crystal system      | monoclinic                                         |
| Space group         | P2 <sub>1</sub>                                    |
| a/Å                 | 10.7826(3)                                         |
| b/Å                 | 7.7550(3)                                          |
| c/Å                 | 17.6467(5)                                         |

|                                               |                                                               |
|-----------------------------------------------|---------------------------------------------------------------|
| $\alpha/^\circ$                               | 90                                                            |
| $\beta/^\circ$                                | 100.124(3)                                                    |
| $\gamma/^\circ$                               | 90                                                            |
| Volume/ $\text{\AA}^3$                        | 1452.62(8)                                                    |
| Z                                             | 4                                                             |
| $\rho_{\text{calc}}/\text{g/cm}^3$            | 1.482                                                         |
| $\mu/\text{mm}^{-1}$                          | 9.573                                                         |
| F(000)                                        | 672.0                                                         |
| Crystal size/ $\text{mm}^3$                   | $0.15 \times 0.13 \times 0.11$                                |
| Radiation                                     | Cu K $\alpha$ ( $\lambda = 1.54184$ )                         |
| $2\Theta$ range for data collection/ $^\circ$ | 5.086 to 147.79                                               |
| Index ranges                                  | $-13 \leq h \leq 13, -9 \leq k \leq 9, -21 \leq l \leq 15$    |
| Reflections collected                         | 8996                                                          |
| Independent reflections                       | 5293 [ $R_{\text{int}} = 0.0756, R_{\text{sigma}} = 0.1045$ ] |
| Data/restraints/parameters                    | 5293/13/363                                                   |
| Goodness-of-fit on $F^2$                      | 1.027                                                         |
| Final R indexes [ $I \geq 2\sigma(I)$ ]       | $R_1 = 0.0692, wR_2 = 0.1747$                                 |
| Final R indexes [all data]                    | $R_1 = 0.0884, wR_2 = 0.1898$                                 |
| Largest diff. peak/hole / $e \text{\AA}^{-3}$ | 0.60/-0.99                                                    |
| Flack parameter                               | -0.006(9)                                                     |

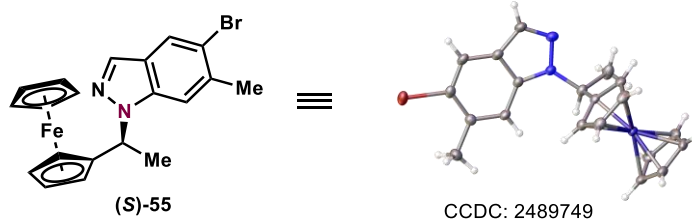

ORTEP drawing of compound (S)-55 with 50% thermal ellipsoids.

**Crystal sample preparation:** compound (S)-55 (10 mg) was added to a 10 mL glass vial and dissolved by the addition of methanol (2 mL). Stuff the bottle mouth with an absorbent cotton, place at room temperature for 3 days, a colorless crystal of (S)-55 was obtained for X-ray analysis.

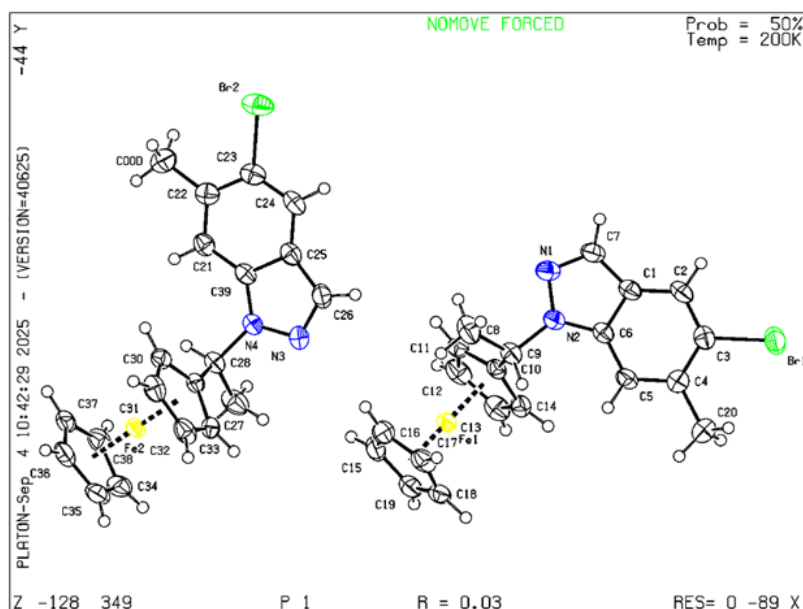

|                     |                                                                                |
|---------------------|--------------------------------------------------------------------------------|
| Identification code | CCDC: 2489749                                                                  |
| Empirical formula   | C <sub>40</sub> H <sub>38</sub> Br <sub>2</sub> Fe <sub>2</sub> N <sub>4</sub> |
| Formula weight      | 846.26                                                                         |
| Temperature/K       | 200.00(10)                                                                     |
| Crystal system      | triclinic                                                                      |
| Space group         | P1                                                                             |
| a/Å                 | 6.04841(16)                                                                    |

|                                                |                                                                  |
|------------------------------------------------|------------------------------------------------------------------|
| b/Å                                            | 12.0883(3)                                                       |
| c/Å                                            | 12.3620(4)                                                       |
| $\alpha/^\circ$                                | 85.012(2)                                                        |
| $\beta/^\circ$                                 | 89.508(2)                                                        |
| $\gamma/^\circ$                                | 77.839(2)                                                        |
| Volume/Å <sup>3</sup>                          | 880.17(4)                                                        |
| Z                                              | 1                                                                |
| $\rho_{\text{calc}}/\text{cm}^3$               | 1.597                                                            |
| $\mu/\text{mm}^{-1}$                           | 9.534                                                            |
| F(000)                                         | 428.0                                                            |
| Crystal size/mm <sup>3</sup>                   | 0.13 × 0.12 × 0.11                                               |
| Radiation                                      | Cu K $\alpha$ ( $\lambda = 1.54184$ )                            |
| 2 $\Theta$ range for data collection/ $^\circ$ | 7.178 to 146.844                                                 |
| Index ranges                                   | -7 ≤ h ≤ 7, -14 ≤ k ≤ 14, -13 ≤ l ≤ 15                           |
| Reflections collected                          | 19153                                                            |
| Independent reflections                        | 5419 [ $R_{\text{int}} = 0.0280$ , $R_{\text{sigma}} = 0.0184$ ] |
| Data/restraints/parameters                     | 5419/3/437                                                       |
| Goodness-of-fit on F <sup>2</sup>              | 1.054                                                            |
| Final R indexes [ $I \geq 2\sigma(I)$ ]        | $R_1 = 0.0263$ , $wR_2 = 0.0718$                                 |
| Final R indexes [all data]                     | $R_1 = 0.0268$ , $wR_2 = 0.0720$                                 |
| Largest diff. peak/hole / e Å <sup>-3</sup>    | 0.41/-0.32                                                       |
| Flack/Hoof parameter                           | 0.001(3)/-0.004(11)                                              |

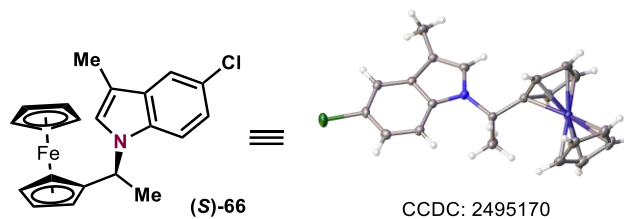

ORTEP drawing of compound (S)-66 with 50% thermal ellipsoids.

**Crystal sample preparation:** compound (S)-66 (10 mg) was added to a 10 mL glass vial and dissolved by the addition of methanol (2 mL) and dichloromethane (0.5 mL). Stuff the bottle mouth with an absorbent cotton, place at room temperature for 3 days, a colorless crystal of (S)-66 was obtained for X-ray analysis.

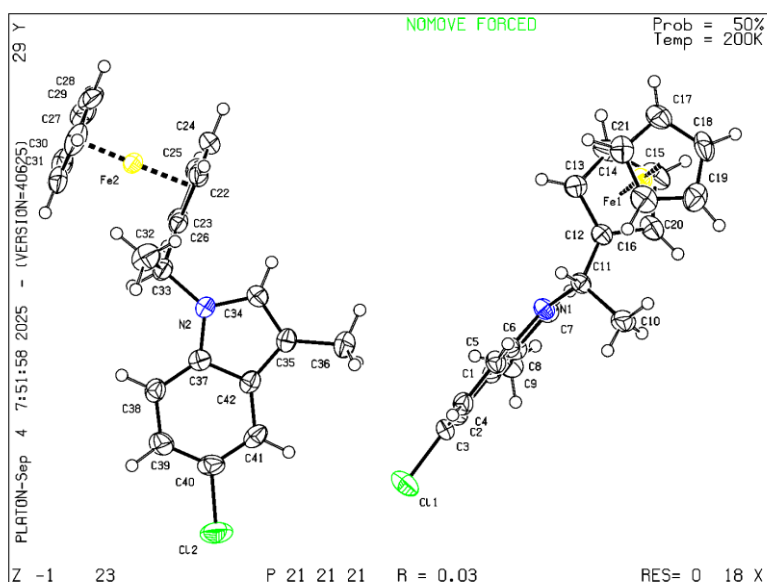

|                     |                                               |
|---------------------|-----------------------------------------------|
| Identification code | CCDC: 2495170                                 |
| Empirical formula   | C <sub>21</sub> H <sub>20</sub> ClFeN         |
| Formula weight      | 377.68                                        |
| Temperature/K       | 200.00(10)                                    |
| Crystal system      | orthorhombic                                  |
| Space group         | P2 <sub>1</sub> 2 <sub>1</sub> 2 <sub>1</sub> |
| a/Å                 | 7.60479(6)                                    |
| b/Å                 | 12.96157(9)                                   |

|                                               |                                                               |
|-----------------------------------------------|---------------------------------------------------------------|
| $c/\text{\AA}$                                | 36.3865(3)                                                    |
| $\alpha/^\circ$                               | 90                                                            |
| $\beta/^\circ$                                | 90                                                            |
| $\gamma/^\circ$                               | 90                                                            |
| Volume/ $\text{\AA}^3$                        | 3586.61(5)                                                    |
| Z                                             | 8                                                             |
| $\rho_{\text{calc}}/\text{cm}^3$              | 1.399                                                         |
| $\mu/\text{mm}^{-1}$                          | 8.100                                                         |
| F(000)                                        | 1568.0                                                        |
| Crystal size/ $\text{mm}^3$                   | $0.14 \times 0.12 \times 0.11$                                |
| Radiation                                     | Cu K $\alpha$ ( $\lambda = 1.54184$ )                         |
| $2\Theta$ range for data collection/ $^\circ$ | 7.24 to 145.898                                               |
| Index ranges                                  | $-9 \leq h \leq 8, -15 \leq k \leq 16, -44 \leq l \leq 42$    |
| Reflections collected                         | 54553                                                         |
| Independent reflections                       | 6976 [ $R_{\text{int}} = 0.0398, R_{\text{sigma}} = 0.0242$ ] |
| Data/restraints/parameters                    | 6976/0/437                                                    |
| Goodness-of-fit on $F^2$                      | 1.066                                                         |
| Final R indexes [ $I \geq 2\sigma(I)$ ]       | $R_1 = 0.0277, wR_2 = 0.0553$                                 |
| Final R indexes [all data]                    | $R_1 = 0.0306, wR_2 = 0.0561$                                 |
| Largest diff. peak/hole / $e \text{\AA}^{-3}$ | 0.20/-0.24                                                    |
| Flack/Hoofst parameter                        | -0.0115(13)/-0.0108(11)                                       |

## 7. Characterization Data of Products

### (*S*)-phenyl(ferrocene-2-yl)methanol (S2)

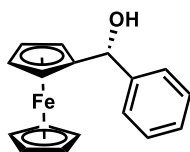

**TLC:**  $R_f = 0.35$  (petroleum ether/Ethyl acetate=8/1); 1.05 g, yield: 90%; yellow solid.

**$^1\text{H NMR}$**  (400 MHz,  $\text{CDCl}_3$ )  $\delta$  7.40 – 7.37 (m, 2H), 7.34 – 7.30 (m, 2H), 7.27 – 7.22 (m, 1H), 5.46 (d,  $J = 3.2$  Hz, 1H), 4.23 – 4.16 (m, 9H), 2.46 (d,  $J = 3.2$  Hz, 1H).

**$^{13}\text{C NMR}$**  (101 MHz,  $\text{CDCl}_3$ )  $\delta$  143.2, 128.2, 127.4, 126.2, 94.3, 72.0, 68.5, 68.2, 68.1, 67.4, 65.9.

**HRMS** (ESI-TOF)  $m/z$ :  $[\text{M}+\text{K}]^+$  Calcd for  $\text{C}_{17}\text{H}_{16}\text{FeOK}$  331.0177; Found: 331.0189.

**Chiral HPLC:** The ee value was 93%,  $t_R$  (minor) = 12.2 min,  $t_S$  (major) = 16.7 min (Chiralpak IA,  $\lambda = 254$  nm, 10% isopropanol/hexanes, flow rate = 1.0 mL/min).

### (*S*)-ferrocene-2-yl(4-(trifluoromethyl)phenyl)methanol (S3)

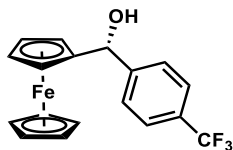

**TLC:**  $R_f = 0.35$  (petroleum ether/Ethyl acetate=8/1); 1.55 g, yield: 43%; yellow solid.

**$^1\text{H NMR}$**  (400 MHz,  $\text{CDCl}_3$ )  $\delta$  7.59 (d,  $J = 8.3$  Hz, 2H), 7.51 (d,  $J = 8.1$  Hz, 2H), 5.49 (d,  $J = 3.0$  Hz, 1H), 4.26 – 4.17 (m, 9H), 2.63 (d,  $J = 3.0$  Hz, 1H).

**$^{13}\text{C NMR}$**  (101 MHz,  $\text{CDCl}_3$ )  $\delta$  147.1, 129.6, 129.3, 126.3, 125.2, 125.1, 125.1, 125.1, 93.8, 71.2, 68.5, 68.4, 68.3, 67.4, 65.6.

**$^{19}\text{F NMR}$**  (376 MHz,  $\text{CDCl}_3$ )  $\delta$  -115.16.

**HRMS** (ESI-TOF)  $m/z$ :  $[\text{M}+\text{H}]^+$  Calcd for  $\text{C}_{18}\text{H}_{16}\text{F}_3\text{FeO}$  361.0492; Found: 361.0522.

**Chiral HPLC:** The ee value was 96%,  $t_R$  (minor) = 11.7 min,  $t_S$  (major) = 13.3 min (Chiralpak IA,  $\lambda = 254$  nm, 10% isopropanol/hexanes, flow rate = 1.0 mL/min).

### (*S*)-(4-fluorophenyl)(ferrocene-2-yl)methanol (S4)

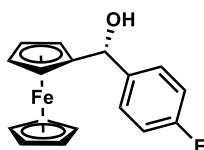

**TLC:**  $R_f = 0.28$  (petroleum ether/Ethyl acetate=8/1); 650 mg, yield: 19%; yellow oil.

**$^1\text{H NMR}$**  (400 MHz,  $\text{CDCl}_3$ )  $\delta$  7.37 – 7.33 (m, 2H), 7.04 – 6.98 (m, 2H), 5.45 (d,  $J = 3.0$  Hz, 1H), 4.24 – 4.18 (m, 9H), 2.48 (d,  $J = 3.0$  Hz, 1H).

**$^{13}\text{C NMR}$**  (101 MHz,  $\text{CDCl}_3$ )  $\delta$  163.3, 160.8, 139.0, 139.0, 127.9, 127.8, 115.1, 114.9, 94.2, 71.3, 68.5, 68.3, 68.2, 67.4, 65.7.

**$^{19}\text{F NMR}$**  (376 MHz,  $\text{CDCl}_3$ )  $\delta$  -115.16.

**HRMS** (ESI-TOF)  $m/z$ :  $[\text{M}+\text{H}]^+$  Calcd for  $\text{C}_{17}\text{H}_{15}\text{FFeO}$  311.0524; Found: 311.0520.

**Chiral HPLC:** The ee value was 83%,  $t_R$  (minor) = 12.6 min,  $t_S$  (major) = 14.6 min (Chiralpak IA,  $\lambda = 254$  nm, 10% isopropanol/hexanes, flow rate = 1.0 mL/min).

**(S)-1-(ferrocene-2-yl)propan-1-ol (S5)**

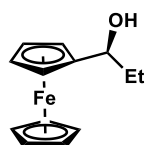

**TLC:**  $R_f = 0.47$  (petroleum ether/Ethyl acetate = 8:1); 75 mg, yield: 30%; yellow oil.

**$^1\text{H NMR}$**  (400 MHz,  $\text{CDCl}_3$ )  $\delta$  4.25 – 4.23 (m, 1H), 4.20 (s, 5H), 4.19 – 4.17 (m, 1H), 4.16 – 4.15 (m, 2H), 1.94 (d,  $J = 3.4$  Hz, 1H), 1.73 – 1.64 (m, 2H), 0.95 (t,  $J = 7.4$  Hz, 3H).

**$^{13}\text{C NMR}$**  (101 MHz,  $\text{CDCl}_3$ )  $\delta$  94.3, 71.1, 68.2, 67.8, 67.7, 67.3, 65.1, 31.0, 10.3.

**HRMS** (ESI-TOF)  $m/z$ :  $[\text{M}+\text{Na}]^+$  Calcd for  $\text{C}_{13}\text{H}_{16}\text{FeONa}$  267.0437; Found: 267.0443.

**Chiral HPLC:** The ee value was 98%,  $t_R$  (minor) = 9.2 min,  $t_S$  (major) = 14.1 min (Chiralpak IA,  $\lambda = 254$  nm, 10% isopropanol/hexanes, flow rate = 1.0 mL/min).

**(S)-1-(ferrocene-2-yl)butan-1-ol (S6)**

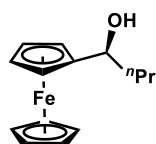

**TLC:**  $R_f = 0.41$  (petroleum ether/Ethyl acetate = 8:1); 80 mg, yield: 31%; yellow oil.

**$^1\text{H NMR}$**  (400 MHz,  $\text{CDCl}_3$ )  $\delta$  4.33 (ddd,  $J = 8.2, 4.9, 3.3$  Hz, 1H), 4.25 – 4.23 (m, 1H), 4.21 – 4.19 (m, 5H), 4.19 – 4.15 (m, 3H), 1.92 (d,  $J = 3.4$  Hz, 1H), 1.72 – 1.64 (m, 1H), 1.61 – 1.53 (m, 1H), 1.52 – 1.43 (m, 1H), 1.43 – 1.31 (m, 1H), 0.93 (t,  $J = 7.3$  Hz, 3H).

**$^{13}\text{C NMR}$**  (101 MHz,  $\text{CDCl}_3$ )  $\delta$  94.6, 69.4, 68.2, 67.8, 67.7, 67.2, 65.2, 40.3, 19.2, 14.0.

**HRMS** (ESI-TOF)  $m/z$ :  $[M+Na]^+$  Calcd for  $C_{14}H_{18}FeONa$  281.0593; Found: 281.0602.

**Chiral HPLC**: The ee value was 98%,  $t_R$  (minor) = 8.8 min  $t_S$  (major) = 11.8 min (Chiralpak IA,  $\lambda$  = 254 nm, 10% isopropanol/hexanes, flow rate = 1.0 mL/min).

**(S)-1-phenyl-2-(ferrocene-2-yl)ethan-1-ol (S7)**

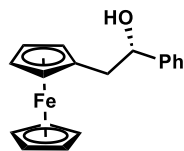

**TLC**:  $R_f$  = 0.37 (petroleum ether/Ethyl acetate = 8/1); 400 mg, yield: 12%; yellow solid.

**$^1H$  NMR** (400 MHz,  $CDCl_3$ )  $\delta$  7.39 – 7.33 (m, 4H), 7.32 – 7.27 (m, 1H), 4.68 (dd,  $J$  = 8.2, 4.9 Hz, 1H), 4.17 – 4.07 (m, 8H), 4.07 (s, 1H), 2.82 – 2.71 (m, 2H), 2.36 (s, 1H).

**$^{13}C$  NMR** (101 MHz,  $CDCl_3$ )  $\delta$  144.0, 128.2, 127.4, 125.7, 84.2, 75.0, 69.3, 68.8, 68.6, 67.9, 67.8, 40.2.

**HRMS** (ESI-TOF)  $m/z$ :  $[M]^+$  Calcd for  $C_{18}H_{18}FeO$  306.0701; Found: 306.0703.

**Chiral HPLC**: The ee value was 97%,  $t_S$  (major) = 9.8 min,  $t_R$  (minor) = 10.6 min (Chiralpak IF,  $\lambda$  = 254 nm, 10% isopropanol/hexanes, flow rate = 1.0 mL/min).

**(S)-1-(1-Hydroxyethyl)-1'-bromoferrocene (S8)**

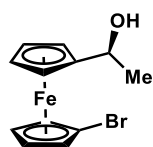

**TLC**:  $R_f$  = 0.41 (petroleum ether/Ethyl acetate=8/1); 113 mg, yield: 37%; yellow oil.

**$^1H$  NMR** (400 MHz,  $CDCl_3$ )  $\delta$  4.68 – 4.63 (m, 1H), 4.43 – 4.40 (m, 2H), 4.26 – 4.24 (m, 1H), 4.23 – 4.19 (m, 3H), 4.13 – 4.12 (m, 2H), 1.94 (d,  $J$  = 4.3 Hz, 1H), 1.46 – 1.44 (m, 3H).

**$^{13}C$  NMR** (101 MHz,  $CDCl_3$ )  $\delta$  96.2, 77.8, 70.5, 70.5, 70.4, 70.4, 68.5, 68.4, 67.4, 65.3, 24.1.

**HRMS** (ESI-TOF)  $m/z$ :  $[M+H]^+$  Calcd for  $C_{12}H_{14}BrFeO$  308.9566; Found: 308.9550.

**Chiral HPLC**: The ee value was 96%,  $t_S$  (major) = 6.5 min,  $t_R$  (minor) = 7.1 min (Chiralpak IC,  $\lambda$  = 254 nm, 10% isopropanol/hexanes, flow rate = 1.0 mL/min).

**(S)-1-(1-Hydroxyethyl)-1'-ethylferrocene (S9)**

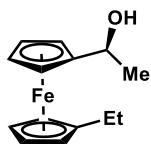

**TLC:**  $R_f = 0.45$  (petroleum ether/Ethyl acetate=8/1); 175 mg, yield: 67%; yellow oil.

**$^1\text{H NMR}$**  (400 MHz,  $\text{CDCl}_3$ )  $\delta$  4.57 – 4.48 (m, 1H), 4.17 – 4.08 (m, 8H), 2.36 – 2.29 (m, 2H), 1.43 (dd,  $J = 6.5, 4.8$  Hz, 3H), 1.16 (t,  $J = 7.5$  Hz, 3H).

**$^{13}\text{C NMR}$**  (101 MHz,  $\text{CDCl}_3$ )  $\delta$  95.0, 92.0, 69.1, 68.9, 68.9, 68.1, 68.1, 67.5, 66.8, 66.8, 65.4, 29.3, 23.5, 22.0, 14.7.

**HRMS** (ESI-TOF)  $m/z$ :  $[\text{M}+\text{Na}]^+$  Calcd for  $\text{C}_{14}\text{H}_{18}\text{FeONa}$  281.0593; Found: 281.0601.

**Chiral HPLC:** The ee value was 98%,  $t_S$  (major) = 13.8 min,  $t_R$  (minor) = 16.7 min (Chiralpak IC,  $\lambda = 254$  nm, 3% isopropanol/hexanes, flow rate = 0.8 mL/min).

**(S)-1-(ruthenocene-2-yl)ethan-1-ol (S12)**

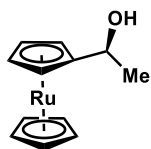

**TLC:**  $R_f = 0.39$  (petroleum ether/Ethyl acetate = 8/1); 242 mg, yield: 88%; white solid.

**$^1\text{H NMR}$**  (400 MHz,  $\text{CDCl}_3$ )  $\delta$  4.68 – 4.67 (m, 1H), 4.66 – 4.64 (m, 1H), 4.61 (s, 5H), 4.53 – 4.51 (m, 2H), 4.28 – 4.26 (m, 1H), 1.34 (d,  $J = 6.3$  Hz, 3H).

**$^{13}\text{C NMR}$**  (101 MHz,  $\text{CDCl}_3$ )  $\delta$  100.7, 70.4, 70.2, 70.2, 69.8, 68.8, 63.7, 23.5.

**HRMS** (ESI-TOF)  $m/z$ :  $[\text{M}+\text{H}]^+$  Calcd for  $\text{C}_{12}\text{H}_{15}\text{ORu}$  277.0161; Found: 277.0158.

**Chiral HPLC:** The ee value was 93%,  $t_S$  (major) = 7.0 min,  $t_R$  (minor) = 7.6 min (Chiralpak IC,  $\lambda = 254$  nm, 10% isopropanol/hexanes, flow rate = 1.0 mL/min).

**(S)-1-(benzylthio)ethylferrocene (3)**

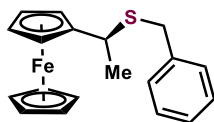

**TLC:**  $R_f = 0.68$  (petroleum ether/Ethyl acetate = 20/1); 63 mg, yield: 94%; yellow oil.

$[\alpha]_D^{23.8} = 8$  ( $c = 1.0$ ,  $\text{CHCl}_3$ ).

**$^1\text{H NMR}$**  (400 MHz,  $\text{CDCl}_3$ )  $\delta$  7.33 – 7.23 (m, 5H), 4.19 – 4.14 (m, 9H), 3.71 – 3.61 (m, 3H), 1.64 (d,  $J = 7.0$  Hz, 3H).

$^{13}\text{C}$  NMR (101 MHz,  $\text{CDCl}_3$ )  $\delta$  138.5, 128.8, 128.4, 126.8, 91.5, 68.6, 67.8, 67.7, 67.4, 65.9, 38.6, 35.5, 21.3.

**HRMS** (ESI-TOF)  $m/z$ :  $[\text{M}+\text{K}]^+$  Calcd for  $\text{C}_{19}\text{H}_{20}\text{FeSK}$  375.0261; Found: 375.0274.

**Chiral HPLC**: The ee value was 99%,  $t_R$  (minor) = 6.3 min,  $t_S$  (major) = 7.3 min (Chiralpak IA,  $\lambda$  = 254 nm, 3% isopropanol/hexanes, flow rate = 0.8 mL/min).

**(S)-1-((2-methylbenzyl)thio)ethylferrocene (4)**

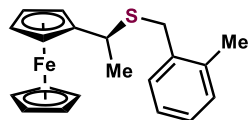

**TLC**:  $R_f$  = 0.57 (petroleum ether/Ethyl acetate = 20/1); 65 mg, yield: 93%; yellow oil.

$^1\text{H}$  NMR (400 MHz,  $\text{CDCl}_3$ )  $\delta$  7.25 – 7.23 (m, 1H), 7.17 – 7.12 (m, 3H), 4.23 (s, 1H), 4.18 – 4.15 (m, 8H), 3.77 – 3.64 (m, 3H), 2.34 (s, 3H), 1.71 (d,  $J$  = 7.0 Hz, 3H).

$^{13}\text{C}$  NMR (101 MHz,  $\text{CDCl}_3$ )  $\delta$  136.7, 136.0, 130.4, 129.4, 127.1, 125.8, 91.5, 68.6, 67.8, 67.6, 67.5, 66.0, 39.2, 33.3, 21.3, 19.1.

**HRMS** (ESI-TOF)  $m/z$ :  $[\text{M}]^+$  Calcd for  $\text{C}_{20}\text{H}_{22}\text{FeS}$  350.0786; Found: 350.0789.

**Chiral HPLC**: The ee value was 97%,  $t_R$  (minor) = 5.8 min,  $t_S$  (major) = 6.4 min (Chiralpak IF,  $\lambda$  = 254 nm, 3% isopropanol/hexanes, flow rate = 0.8 mL/min).

**(S)-1-((3-methylbenzyl)thio)ethylferrocene (5)**

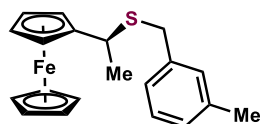

**TLC**:  $R_f$  = 0.44 (petroleum ether/Ethyl acetate = 20/1); 65 mg, yield: 93%; yellow oil.

$^1\text{H}$  NMR (400 MHz,  $\text{CDCl}_3$ )  $\delta$  7.22 (dd,  $J$  = 15.0, 7.5 Hz, 1H), 7.15 – 7.12 (m, 2H), 7.06 (d,  $J$  = 7.5 Hz, 1H), 4.22 (d,  $J$  = 1.8 Hz, 1H), 4.16 – 4.15 (m, 8H), 3.70 – 3.62 (m, 3H), 2.36 (s, 3H), 1.67 (d,  $J$  = 7.0 Hz, 3H).

$^{13}\text{C}$  NMR (101 MHz,  $\text{CDCl}_3$ )  $\delta$  138.3, 138.0, 129.5, 128.2, 127.5, 125.8, 91.5, 68.6, 67.8, 67.6, 67.4, 65.8, 38.6, 35.4, 21.3, 21.2.

**HRMS** (ESI-TOF)  $m/z$ :  $[\text{M}]^+$  Calcd for  $\text{C}_{20}\text{H}_{22}\text{FeS}$  350.0786; Found: 350.0789.

**Chiral HPLC**: The ee value was 99%,  $t_R$  (minor) = 5.9 min,  $t_S$  (major) = 7.1 min (Chiralpak IF,  $\lambda$  = 254 nm, 3% isopropanol/hexanes, flow rate = 0.8 mL/min)

**(S)-1-((4-methylbenzyl)thio)ethylferrocene (6)**

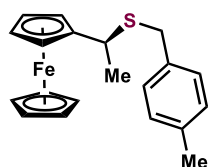

**TLC:**  $R_f = 0.57$  (petroleum ether/Ethyl acetate = 20/1); 66 mg, yield: 94%; yellow oil.

**$^1\text{H NMR}$**  (400 MHz,  $\text{CDCl}_3$ )  $\delta$  7.22 (d,  $J = 8.1$  Hz, 2H), 7.12 (d,  $J = 7.9$  Hz, 2H), 4.21 – 4.20 (m, 1H), 4.15 – 4.14 (m, 8H), 3.69 – 3.61 (m, 3H), 2.34 (s, 3H), 1.65 (d,  $J = 7.0$  Hz, 3H).

**$^{13}\text{C NMR}$**  (101 MHz,  $\text{CDCl}_3$ )  $\delta$  136.4, 135.4, 129.1, 128.7, 91.5, 68.6, 67.8, 67.6, 67.4, 65.9, 38.5, 35.1, 21.3, 21.1.

**HRMS** (ESI-TOF)  $m/z$ :  $[\text{M}]^+$  Calcd for  $\text{C}_{20}\text{H}_{22}\text{FeS}$  350.0786; Found: 350.0790.

**Chiral HPLC:** The ee value was 97%,  $t_R$  (minor) = 6.1 min,  $t_S$  (major) = 6.9 min (Chiralpak IF,  $\lambda = 254$  nm, 3% isopropanol/hexanes, flow rate = 0.8 mL/min).

**(S)-1-((4-fluorobenzyl)thio)ethylferrocene (7)**

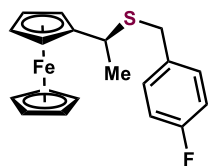

**TLC:**  $R_f = 0.46$  (petroleum ether/Ethyl acetate = 20/1); 66 mg, yield: 93%; yellow oil.

**$^1\text{H NMR}$**  (400 MHz,  $\text{CDCl}_3$ )  $\delta$  7.28 – 7.24 (m, 2H), 7.00 – 6.95 (m, 2H), 4.19 – 4.17 (m, 1H), 4.15 – 4.10 (m, 8H), 3.67 – 3.58 (m, 3H), 1.63 (dd,  $J = 6.9, 1.6$  Hz, 3H).

**$^{13}\text{C NMR}$**  (101 MHz,  $\text{CDCl}_3$ )  $\delta$  162.9, 160.5, 134.2, 134.2, 130.3, 130.2, 115.3, 115.1, 91.3, 68.7, 67.8, 67.7, 67.5, 65.9, 38.7, 34.6, 21.2.

**$^{19}\text{F NMR}$**  (376 MHz,  $\text{CDCl}_3$ )  $\delta$  -115.83.

**HRMS** (ESI-TOF)  $m/z$ :  $[\text{M}]^+$  Calcd for  $\text{C}_{19}\text{H}_{19}\text{FFeS}$  354.0535; Found: 354.0537.

**Chiral HPLC:** The ee value was 99%,  $t_R$  (minor) = 7.1 min,  $t_S$  (major) = 7.9 min (Chiralpak IA,  $\lambda = 254$  nm, 3% isopropanol/hexanes, flow rate = 0.8 mL/min).

**(S)-1-((4-chlorobenzyl)thio)ethylferrocene (8)**

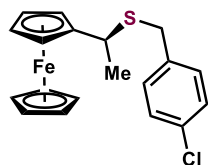

**TLC:**  $R_f = 0.57$  (petroleum ether/Ethyl acetate = 20/1); 74 mg, yield: 98%; yellow oil.

**<sup>1</sup>H NMR** (400 MHz, CDCl<sub>3</sub>) δ 7.28 – 7.22 (m, 4H), 4.18 – 4.09 (m, 9H), 3.65 – 3.57 (m, 3H), 1.63 (d, *J* = 6.9 Hz, 3H).

**<sup>13</sup>C NMR** (101 MHz, CDCl<sub>3</sub>) δ 137.1, 132.4, 130.1, 128.5, 91.2, 68.6, 67.8, 67.7, 67.4, 65.8, 38.6, 34.7, 21.2.

**HRMS** (ESI-TOF) *m/z*: [M]<sup>+</sup> Calcd for C<sub>19</sub>H<sub>19</sub>ClFeS 370.0240; Found: 370.0247.

**Chiral HPLC**: The ee value was 98%, *t<sub>R</sub>* (minor) = 7.5 min, *t<sub>S</sub>* (major) = 8.3 min (Chiralpak IF, λ = 254 nm, 3% isopropanol/hexanes, flow rate = 0.8 mL/min).

**(*S*)-1-((4-bromobenzyl)thio)ethylferrocene (9)**

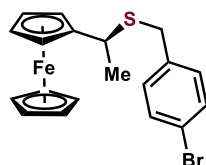

**TLC**: *R<sub>f</sub>* = 0.66 (petroleum ether/Ethyl acetate = 20/1); 79 mg, yield: 96%; yellow oil.

**<sup>1</sup>H NMR** (400 MHz, CDCl<sub>3</sub>) δ 7.44 – 7.40 (m, 2H), 7.21 – 7.17 (m, 2H), 4.22 – 4.07 (m, 9H), 3.67 – 3.56 (m, 3H), 1.64 (d, *J* = 6.9 Hz, 3H).

**<sup>13</sup>C NMR** (101 MHz, CDCl<sub>3</sub>) δ 137.6, 131.5, 130.5, 120.5, 91.2, 68.6, 67.8, 67.7, 67.5, 65.8, 38.7, 34.7, 21.2.

**HRMS** (ESI-TOF) *m/z*: [M]<sup>+</sup> Calcd for C<sub>19</sub>H<sub>19</sub>BrFeS 413.9734; Found: 413.9737.

**Chiral HPLC**: The ee value was 90%, *t<sub>R</sub>* (minor) = 7.3 min, *t<sub>S</sub>* (major) = 9.4 min (Chiralpak IF, λ = 254 nm, 3% isopropanol/hexanes, flow rate = 0.8 mL/min).

**(*S*)-1-((4-methoxybenzyl)thio)ethylferrocene (10)**

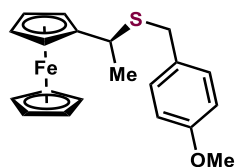

**TLC**: *R<sub>f</sub>* = 0.5 (petroleum ether/Ethyl acetate = 20/1); 67 mg, yield: 92%; yellow oil.

**<sup>1</sup>H NMR** (400 MHz, CDCl<sub>3</sub>) δ 7.27 – 7.17 (m, 2H), 6.89 – 6.77 (m, 2H), 4.22 – 4.07 (m, 9H), 3.79 (s, 3H), 3.68 – 3.58 (m, 3H), 1.64 (d, *J* = 6.9 Hz, 3H).

**<sup>13</sup>C NMR** (101 MHz, CDCl<sub>3</sub>) δ 158.4, 130.4, 129.8, 113.8, 91.5, 68.6, 67.8, 67.6, 67.4, 65.8, 55.2, 38.5, 34.8, 21.3.

**HRMS** (ESI-TOF) *m/z*: [M]<sup>+</sup> Calcd for C<sub>20</sub>H<sub>22</sub>FeOS 366.0735; Found: 366.0734.

**Chiral HPLC:** The ee value was 96%,  $t_R$  (minor) = 8.8 min,  $t_S$  (major) = 10.3 min (Chiralpak IA,  $\lambda$  = 254 nm, 3% isopropanol/hexanes, flow rate = 0.8 mL/min).

**(S)-1-(cyclohexylthio)ethylferrocene (11)**

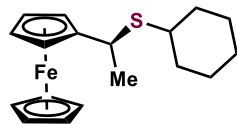

**TLC:**  $R_f$  = 0.47 (petroleum ether/Ethyl acetate = 20/1); 61 mg, yield: 93%; yellow solid.

**$^1\text{H NMR}$**  (400 MHz,  $\text{CDCl}_3$ )  $\delta$  4.20 – 4.13 (m, 9H), 3.81 (q,  $J$  = 6.9 Hz, 1H), 2.66 – 2.59 (m, 1H), 1.94 (dd,  $J$  = 3.9, 1.8 Hz, 1H), 1.86 (dd,  $J$  = 3.9, 1.8 Hz, 1H), 1.77 – 1.72 (m, 2H), 1.65 (d,  $J$  = 6.9 Hz, 3H), 1.61 – 1.59 (m, 1H), 1.32 – 1.23 (m, 5H).

**$^{13}\text{C NMR}$**  (101 MHz,  $\text{CDCl}_3$ )  $\delta$  92.2, 68.6, 67.6, 67.6, 67.4, 65.7, 42.5, 37.0, 34.0, 33.8, 26.1, 25.8, 21.9.

**HRMS** (ESI-TOF)  $m/z$ :  $[\text{M}]^+$  Calcd for  $\text{C}_{20}\text{H}_{22}\text{FeS}$  328.0942; Found: 328.0943.

**Chiral HPLC:** The ee value was 99%,  $t_S$  (major) = 11.1 min,  $t_R$  (minor) = 13.3 min (Chiralpak IF,  $\lambda$  = 254 nm, 0.5% isopropanol/hexanes, flow rate = 0.4 mL/min).

**(S)-1-(((3*s*,5*s*,7*s*)-adamantan-1-yl)thio)ethylferrocene (12)**

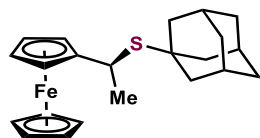

**TLC:**  $R_f$  = 0.40 (PE); 64 mg, yield: 84%; yellow solid.

**$^1\text{H NMR}$**  (400 MHz,  $\text{CDCl}_3$ )  $\delta$  4.25 – 4.08 (m, 9H), 3.74 (q,  $J$  = 7.0 Hz, 1H), 2.05 (s, 3H), 1.91 (s, 6H), 1.71 (d,  $J$  = 7.0 Hz, 9H).

**$^{13}\text{C NMR}$**  (101 MHz,  $\text{CDCl}_3$ )  $\delta$  93.8, 68.5, 67.5, 67.5, 67.4, 66.9, 45.9, 44.0, 36.3, 33.9, 29.7, 25.1.

**HRMS** (ESI-TOF)  $m/z$ :  $[\text{M}]^+$  Calcd for  $\text{C}_{22}\text{H}_{28}\text{FeS}$  380.1255; Found: 380.1254.

**Chiral HPLC:** The ee value was 98%,  $t_R$  (minor) = 8.0 min,  $t_S$  (major) = 9.2 min (Chiralpak IE,  $\lambda$  = 254 nm, 2% isopropanol/hexanes, flow rate = 0.6 mL/min).

**(S)-1-(3-ethoxy-3-oxopropylthio)ethylferrocene (13)**

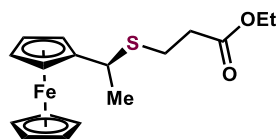

**TLC:**  $R_f = 0.2$  (petroleum ether/Ethyl acetate = 20/1); 62 mg, yield: 88%; yellow oil.

**$^1\text{H NMR}$**  (400 MHz,  $\text{CDCl}_3$ )  $\delta$  4.19 – 4.10 (m, 11H), 3.77 (q,  $J = 6.9$  Hz, 1H), 2.71 (t,  $J = 7.7$  Hz, 2H), 2.48 (t,  $J = 7.5$  Hz, 2H), 1.66 (d,  $J = 6.9$  Hz, 3H), 1.25 (t,  $J = 7.1$  Hz, 3H).

**$^{13}\text{C NMR}$**  (101 MHz,  $\text{CDCl}_3$ )  $\delta$  172.0, 91.3, 68.6, 67.8, 67.7, 67.6, 65.7, 60.6, 39.0, 34.9, 25.7, 21.3, 14.2.

**HRMS** (ESI-TOF)  $m/z$ :  $[\text{M}]^+$  Calcd for  $\text{C}_{17}\text{H}_{22}\text{FeO}_2\text{S}$  346.0684; Found: 346.0684.

**Chiral HPLC:** The ee value was 97%,  $t_R$  (minor) = 5.7 min,  $t_S$  (major) = 6.4 min (Chiralpak IA,  $\lambda = 254$  nm, 10% isopropanol/hexanes, flow rate = 1.0 mL/min).

**(S)-2-(((1-(ferrocene-2-yl)ethyl)thio)methyl)furan (14)**

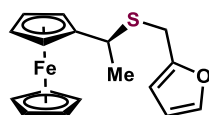

**TLC:**  $R_f = 0.5$  (petroleum ether/Ethyl acetate=20/1); 42 mg, yield: 64%; yellow oil.

**$^1\text{H NMR}$**  (400 MHz,  $\text{CDCl}_3$ )  $\delta$  7.37 (d,  $J = 1.3$  Hz, 1H), 6.32 (dd,  $J = 3.2, 1.9$  Hz, 1H), 6.17 (d,  $J = 2.9$  Hz, 1H), 4.22 – 4.13 (m, 9H), 3.74 (q,  $J = 6.9$  Hz, 1H), 3.66 (s, 2H), 1.65 (d,  $J = 6.9$  Hz, 3H).

**$^{13}\text{C NMR}$**  (101 MHz,  $\text{CDCl}_3$ )  $\delta$  152.2, 141.9, 110.4, 91.1, 68.7, 68.6, 67.9, 67.8, 67.5, 65.8, 38.7, 27.5, 21.1.

**HRMS** (ESI-TOF)  $m/z$ :  $[\text{M}]^+$  Calcd for  $\text{C}_{17}\text{H}_{18}\text{FeOS}$  326.0422; Found: 326.0421.

**Chiral HPLC:** The ee value was 96%,  $t_R$  (minor) = 6.9 min,  $t_S$  (major) = 9.3 min (Chiralpak IA,  $\lambda = 254$  nm, 3% isopropanol/hexanes, flow rate = 0.8 mL/min).

**(S)-2-2-(((1-(ferrocene-2-yl)ethyl)thio)ethyl)pyrazine (15)**

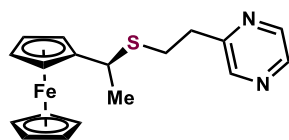

**TLC:**  $R_f = 0.26$  (petroleum ether/Ethyl acetate = 5/1); 59 mg, yield: 84%; yellow oil.

**$^1\text{H NMR}$**  (400 MHz,  $\text{CDCl}_3$ )  $\delta$  8.45 (d,  $J = 28.3$  Hz, 3H), 4.15 (d,  $J = 8.5$  Hz, 9H), 3.75 (q,  $J = 6.9$  Hz, 1H), 2.95 (t,  $J = 7.3$  Hz, 2H), 2.85 (t,  $J = 7.1$  Hz, 2H), 1.65 (d,  $J = 6.9$  Hz, 3H).

$^{13}\text{C}$  NMR (101 MHz,  $\text{CDCl}_3$ )  $\delta$  155.8, 144.7, 144.1, 142.4, 91.3, 68.6, 67.9, 67.7, 67.5, 65.6, 39.1, 35.5, 29.7, 21.2.

**HRMS** (ESI-TOF)  $m/z$ :  $[\text{M}]^+$  Calcd for  $\text{C}_{18}\text{H}_{20}\text{FeN}_2\text{S}$  352.0691; Found: 352.0691.

**Chiral HPLC**: The ee value was 99%,  $t_R$  (minor) = 11.7 min,  $t_S$  (major) = 12.5 min (Chiralpak IA,  $\lambda$  = 254 nm, 10% isopropanol/hexanes, flow rate = 1.0 mL/min).

**(S)-1-(2-hydroxyethylthio)ethylferrocene (16)**

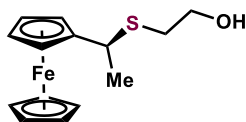

**TLC**:  $R_f$  = 0.23 (petroleum ether/Ethyl acetate=5/1); 51 mg, yield: 88%; yellow oil.

$^1\text{H}$  NMR (400 MHz,  $\text{CDCl}_3$ )  $\delta$  4.18 – 4.15 (m, 9H), 3.78 (q,  $J$  = 6.9 Hz, 1H), 3.60 (t,  $J$  = 6.1 Hz, 2H), 2.66 (t,  $J$  = 6.0 Hz, 2H), 1.67 (d,  $J$  = 7.0 Hz, 3H).

$^{13}\text{C}$  NMR (101 MHz,  $\text{CDCl}_3$ )  $\delta$  91.2, 68.6, 67.9, 67.8, 67.6, 65.6, 60.7, 38.6, 33.8, 21.4.

**HRMS** (ESI-TOF)  $m/z$ :  $[\text{M}]^+$  Calcd for  $\text{C}_{14}\text{H}_{18}\text{FeOS}$  290.0422; Found: 290.0420.

**Chiral HPLC**: The ee value was 99%,  $t_R$  (minor) = 11.2 min,  $t_S$  (major) = 13.7 min (Chiralpak Ia,  $\lambda$  = 254 nm, 10% isopropanol/hexanes, flow rate = 1.0 mL/min).

**(S)-2-((1-ferrocene)ethylthio)aniline (17)**

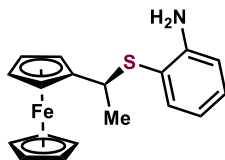

**TLC**:  $R_f$  = 0.21 (petroleum ether/Ethyl acetate = 20:1); 64 mg, yield: 95%; yellow oil.

$^1\text{H}$  NMR (400 MHz,  $\text{CDCl}_3$ )  $\delta$  7.26 (dd,  $J$  = 7.8, 1.4 Hz, 1H), 7.15 – 7.11 (m, 1H), 6.71 – 6.63 (m, 2H), 4.16 – 4.07 (m, 9H), 3.97 (q,  $J$  = 6.9 Hz, 2H), 3.93 – 3.92 (m, 1H), 1.62 (d,  $J$  = 6.9 Hz, 3H).

$^{13}\text{C}$  NMR (101 MHz,  $\text{CDCl}_3$ )  $\delta$  149.2, 137.8, 130.1, 118.2, 117.3, 114.8, 91.0, 68.5, 68.0, 67.6, 67.6, 65.4, 43.3, 20.8.

**HRMS** (ESI-TOF)  $m/z$ :  $[\text{M}]^+$  Calcd for  $\text{C}_{18}\text{H}_{19}\text{FeNS}$  337.0582; Found: 337.0582.

**Chiral HPLC**: The ee value was 99%,  $t_R$  (minor) = 8.5 min,  $t_S$  (major) = 11.3 min (Chiralpak IA,  $\lambda$  = 254 nm, 15% isopropanol/hexanes, flow rate = 1.0 mL/min).

**(S)-1-((4-bromophenyl)thio)ethylferrocene (18)**

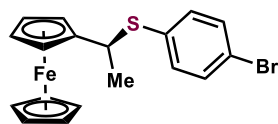

**TLC:**  $R_f = 0.61$  (petroleum ether/Ethyl acetate=20/1); 69 mg, yield: 86%; yellow oil.

**$^1\text{H NMR}$**  (400 MHz,  $\text{CDCl}_3$ )  $\delta$  7.41 – 7.38 (m, 2H), 7.22 – 7.18 (m, 2H), 4.17 – 4.11 (m, 9H), 4.03 – 4.02 (m, 1H), 1.63 (d,  $J = 6.9$  Hz, 3H).

**$^{13}\text{C NMR}$**  (101 MHz,  $\text{CDCl}_3$ )  $\delta$  134.8, 134.1, 131.7, 121.5, 90.4, 68.7, 67.9, 67.8, 67.6, 66.0, 43.8, 21.0.

**HRMS** (ESI-TOF)  $m/z$ :  $[\text{M}]^+$  Calcd for  $\text{C}_{18}\text{H}_{17}\text{BrFeS}$  399.9578; Found: 399.9577.

**Chiral HPLC:** The ee value was 99%,  $t_R$  (minor) = 6.5 min,  $t_S$  (major) = 7.2 min (Chiralpak IF,  $\lambda = 254$  nm, 2% isopropanol/hexanes, flow rate = 0.8 mL/min).

**(S)-2-(1-(thiophen-2-ylthio)ethyl)ferrocene (19)**

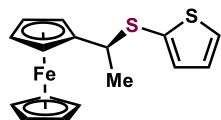

**TLC:**  $R_f = 0.68$  (petroleum ether/Ethyl acetate = 20/1); 61 mg, yield: 93%; yellow oil.

**$^1\text{H NMR}$**  (400 MHz,  $\text{CDCl}_3$ )  $\delta$  7.36 (dd,  $J = 5.3, 1.3$  Hz, 1H), 7.02 – 6.93 (m, 2H), 4.17 – 4.11 (m, 8H), 4.06 – 4.05 (m, 1H), 3.99 (q,  $J = 6.9$  Hz, 1H), 1.64 (d,  $J = 6.9$  Hz, 3H).

**$^{13}\text{C NMR}$**  (101 MHz,  $\text{CDCl}_3$ )  $\delta$  135.5, 133.1, 130.1, 127.4, 90.0, 68.6, 68.1, 67.7, 67.6, 65.9, 46.7, 20.7.

**HRMS** (ESI-TOF)  $m/z$ :  $[\text{M}]^+$  Calcd for  $\text{C}_{16}\text{H}_{16}\text{FeS}_2$  328.0037; Found: 328.0036.

**Chiral HPLC:** The ee value was 95%,  $t_R$  (minor) = 5.6 min,  $t_S$  (major) = 6.5 min (Chiralpak IF,  $\lambda = 254$  nm, 3% isopropanol/hexanes, flow rate = 0.8 mL/min).

**(S)-2-((1-(ferrocene-2-yl)ethyl)thio)pyrimidine (20)**

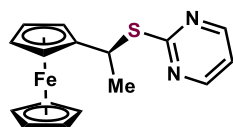

**TLC:**  $R_f = 0.31$  (petroleum ether/Ethyl acetate = 8/1); 42 mg, yield: 65%; yellow solid.

**$^1\text{H NMR}$**  (400 MHz,  $\text{CDCl}_3$ )  $\delta$  8.53 (d,  $J = 4.8$  Hz, 2H), 6.95 (t,  $J = 4.8$  Hz, 1H), 4.86 (q,  $J = 6.8$  Hz, 1H), 4.31 – 4.26 (m, 2H), 4.23 (d,  $J = 0.6$  Hz, 5H), 4.18 – 4.13 (m, 2H), 1.80 (d,  $J = 6.8$  Hz, 3H).

$^{13}\text{C}$  NMR (101 MHz,  $\text{CDCl}_3$ )  $\delta$  172.7, 157.2, 116.3, 89.8, 68.7, 67.8, 67.8, 67.7, 66.8, 39.7, 21.6.

**HRMS** (ESI-TOF)  $m/z$ :  $[\text{M}]^+$  Calcd for  $\text{C}_{16}\text{H}_{16}\text{FeN}_2\text{S}$  324.0378; Found: 324.0376.

**Chiral HPLC**: The ee value was 98%,  $t_S$  (major) = 8.4 min,  $t_R$  (minor) = 11.2 min (Chiralpak IA,  $\lambda$  = 254 nm, 10% isopropanol/hexanes, flow rate = 1.0 mL/min).

**methyl N-acetyl-S-((S)-1-(ferrocene-2-yl)ethyl)-L-cysteinate (21)**

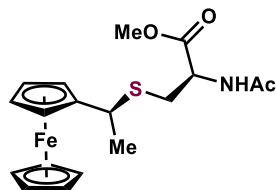

**TLC**:  $R_f$  = 0.33 (petroleum ether/Ethyl acetate = 1/1); 75.0 mg, yield: 96%; yellow oil.

$^1\text{H}$  NMR (400 MHz,  $\text{CDCl}_3$ )  $\delta$  6.15 (d,  $J$  = 7.7 Hz, 1H), 4.74 – 4.69 (m, 1H), 4.15 – 4.13 (m, 9H), 3.76 – 3.69 (m, 4H), 2.90 – 2.81 (m, 2H), 1.98 (s, 3H), 1.62 (d,  $J$  = 7.0 Hz, 3H).

$^{13}\text{C}$  NMR (101 MHz,  $\text{CDCl}_3$ )  $\delta$  171.3, 169.9, 90.8, 68.7, 67.8, 67.7, 65.6, 52.5, 51.6, 39.4, 32.3, 23.1, 21.1.

**HRMS** (ESI-TOF)  $m/z$ :  $[\text{M}]^+$  Calcd for  $\text{C}_{18}\text{H}_{23}\text{FeNO}_3\text{S}$  389.0742; Found: 389.0741.

**Chiral HPLC**: The ee value was 99%,  $t_S$  (major) = 9.1 min,  $t_R$  (minor) = 11.3 min (Chiralpak IA,  $\lambda$  = 254 nm, 20% isopropanol/hexanes, flow rate = 1.0 mL/min).

**(S)-2-((1-(ferrocene-2-yl)ethyl)thio)ethyl 4-(pyren-1-yl)butanoate (22)**

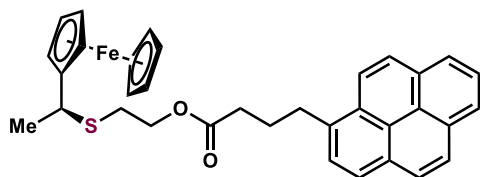

**TLC**:  $R_f$  = 0.43 (petroleum ether/Ethyl acetate = 8/1); 72 mg, yield: 64%; yellow oil.

$^1\text{H}$  NMR (400 MHz,  $\text{CDCl}_3$ )  $\delta$  8.31 (d,  $J$  = 9.3 Hz, 1H), 8.18 (dd,  $J$  = 7.6, 3.0 Hz, 2H), 8.14 (d,  $J$  = 2.4 Hz, 1H), 8.11 (s, 1H), 8.04 (s, 2H), 8.01 (t,  $J$  = 7.6 Hz, 1H), 7.87 (d,  $J$  = 7.8 Hz, 1H), 4.15 – 4.10 (m, 11H), 3.79 (q,  $J$  = 6.9 Hz, 1H), 3.42 – 3.38 (m, 2H), 2.67 (t,  $J$  = 7.1 Hz, 2H), 2.47 (t,  $J$  = 7.3 Hz, 2H), 2.21 (dt,  $J$  = 15.1, 7.3 Hz, 2H), 1.66 (d,  $J$  = 6.9 Hz, 3H).

$^{13}\text{C}$  NMR (101 MHz,  $\text{CDCl}_3$ )  $\delta$  173.2, 135.6, 131.3, 130.8, 129.9, 128.7, 127.4, 127.4, 126.7, 125.8, 125.0, 124.9, 124.9, 124.8, 124.7, 123.3, 91.1, 68.6, 67.9, 67.8, 67.6, 65.6, 63.5, 39.0, 33.7, 32.7, 29.0, 26.7, 21.3.

**HRMS** (ESI-TOF)  $m/z$ :  $[\text{M}]^+$  Calcd for  $\text{C}_{34}\text{H}_{32}\text{FeO}_2\text{S}$  560.1467; Found: 560.1470.

**Chiral HPLC**: The ee value was 97%,  $t_S$  (major) = 21.3 min,  $t_R$  (minor) = 29.8 min (Chiralcel OD-H,  $\lambda$  = 254 nm, 15% isopropanol/hexanes, flow rate = 1.0 mL/min).

**(2S,3S,4R,5S)-2-(acetoxymethyl)-6-(((S)-1-((ferrocene-2-yl)ethyl)thio)tetrahydro-2H-pyran-3,4,5-triyl triacetate (23)**

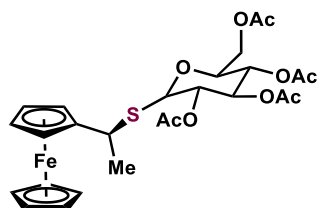

**TLC**:  $R_f$  = 0.41 (petroleum ether/Ethyl acetate = 2/1); 86 mg, yield: 75%; yellow oil.

$^1\text{H}$  NMR (400 MHz,  $\text{CDCl}_3$ )  $\delta$  5.15 – 5.09 (m, 1H), 5.05 – 5.00 (m, 1H), 4.99 – 4.93 (m, 1H), 4.35 (dd,  $J$  = 20.7, 10.2 Hz, 1H), 4.23 – 3.99 (m, 12H), 3.60 – 3.53 (m, 1H), 2.10 (d,  $J$  = 12.5 Hz, 3H), 2.00 – 1.96 (m, 9H), 1.68 (dd,  $J$  = 13.3, 6.9 Hz, 3H).

$^{13}\text{C}$  NMR (101 MHz,  $\text{CDCl}_3$ )  $\delta$  170.6, 170.5, 170.2, 169.3, 169.30, 169.27, 90.3, 89.8, 82.9, 82.7, 75.5, 75.4, 73.9, 73.8, 69.9, 69.7, 68.8, 68.7, 68.4, 68.3, 68.2, 68.1, 68.0, 67.9, 67.7, 67.5, 66.2, 65.6, 62.4, 62.2, 39.5, 39.0, 22.2, 21.6, 20.8, 20.7, 20.6, 20.5.

**HRMS** (ESI-TOF)  $m/z$ :  $[\text{M}+\text{K}]^+$  Calcd for  $\text{C}_{26}\text{H}_{32}\text{FeO}_9\text{SK}$  615.0743; Found: 615.0751.

**Chiral HPLC**: The ee value was 97%,  $t_S$  (major) = 10.2 min,  $t_R$  (minor) = 12.5 min (Chiralpak IA,  $\lambda$  = 254 nm, 10% isopropanol/hexanes, flow rate = 1.0 mL/min).

**(S)-2-((benzylthio)(phenyl)methyl)ferrocene (24)**

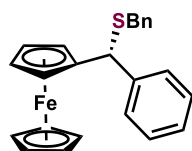

**TLC**:  $R_f$  = 0.67 (petroleum ether/Ethyl acetate=20/1); 67 mg yield: 85%; yellow oil.

$^1\text{H}$  NMR (400 MHz,  $\text{CDCl}_3$ )  $\delta$  7.44 – 7.41 (m, 2H), 7.38 – 7.35 (m, 2H), 7.34 – 7.28 (m, 3H), 7.25 – 7.22 (m, 3H), 4.60 (s, 1H), 4.11 – 4.03 (m, 9H), 3.50 (d,  $J$  = 13.5 Hz, 1H), 3.40 (d,  $J$  = 13.5 Hz, 1H).

$^{13}\text{C}$  NMR (101 MHz,  $\text{CDCl}_3$ )  $\delta$  142.1, 138.3, 129.0, 128.5, 128.4, 128.3, 127.2, 126.8, 89.8, 68.9, 68.1, 67.9, 67.5, 67.4, 48.9, 36.3.

**HRMS** (ESI-TOF)  $m/z$ :  $[\text{M}+\text{K}]^+$  Calcd for  $\text{C}_{24}\text{H}_{22}\text{FeSK}$  437.0418; Found: 437.0413.

**Chiral HPLC**: The ee value was 80%,  $t_{\text{S}}$  (major) = 4.2 min,  $t_{\text{R}}$  (minor) = 5.2 min (Chiralpak IA,  $\lambda$  = 254 nm, 10% isopropanol/hexanes, flow rate = 1.0 mL/min).

**(S)-2-((benzylthio)(4-fluorophenyl)methyl)ferrocene (25)**

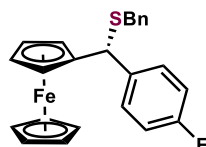

**TLC**:  $R_f$  = 0.4 (petroleum ether/Ethyl acetate=20/1); 65 mg, yield: 78%; yellow oil.

$^1\text{H}$  NMR (400 MHz,  $\text{CDCl}_3$ )  $\delta$  7.42 – 7.38 (m, 2H), 7.34 – 7.31 (m, 2H), 7.27 – 7.24 (m, 3H), 7.06 (t,  $J$  = 8.6 Hz, 2H), 4.60 (s, 1H), 4.10 – 4.05 (m, 9H), 3.53 (d,  $J$  = 13.6 Hz, 1H), 3.41 (d,  $J$  = 13.6 Hz, 1H).

$^{13}\text{C}$  NMR (101 MHz,  $\text{CDCl}_3$ )  $\delta$  163.0, 160.6, 138.1, 137.9, 137.9, 130.03, 129.9, 128.9, 128.4, 126.9, 115.2, 115.0, 89.7, 68.9, 67.9, 67.9, 67.5, 67.3, 48.1, 36.3.

$^{19}\text{F}$  NMR (376 MHz,  $\text{CDCl}_3$ )  $\delta$  -115.05.

**HRMS** (ESI-TOF)  $m/z$ :  $[\text{M}+\text{H}]^+$  Calcd for  $\text{C}_{24}\text{H}_{22}\text{FFeS}$  417.0765; Found: 417.0809.

**Chiral HPLC**: The ee value was 71%,  $t_{\text{R}}$  (minor) = 4.5 min,  $t_{\text{S}}$  (major) = 5.3 min, (Chiralpak IA,  $\lambda$  = 254 nm, 10% isopropanol/hexanes, flow rate = 1.0 mL/min).

**(S)-2-((benzylthio)(4-(trifluoromethyl)phenyl)methyl)ferrocene (26)**

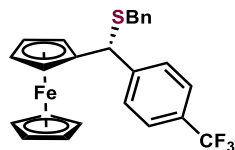

**TLC**:  $R_f$  = 0.4 (petroleum ether/Ethyl acetate=20/1); 64 mg, yield: 69%; yellow oil.

$^1\text{H}$  NMR (400 MHz,  $\text{CDCl}_3$ )  $\delta$  7.61 (d,  $J$  = 8.1 Hz, 2H), 7.53 (d,  $J$  = 8.1 Hz, 2H), 7.34 – 7.30 (m, 2H), 7.27 – 7.23 (m, 3H), 4.64 (s, 1H), 4.09 (d,  $J$  = 7.0 Hz, 8H), 4.04 – 4.03 (m, 1H), 3.55 (d,  $J$  = 13.7 Hz, 1H), 3.39 (d,  $J$  = 13.7 Hz, 1H).

$^{13}\text{C}$  NMR (101 MHz,  $\text{CDCl}_3$ )  $\delta$  146.4, 137.9, 129.5, 129.2, 128.9, 128.8, 128.5, 127.0, 125.3, 125.3, 125.3, 125.2, 88.9, 69.0, 68.1, 67.82, 67.7, 67.4, 48.5, 36.3.

$^{19}\text{F}$  NMR (376 MHz,  $\text{CDCl}_3$ )  $\delta$  -62.18.

**HRMS** (ESI-TOF)  $m/z$ :  $[M+H]^+$  Calcd for  $C_{25}H_{21}F_3FeS$  489.0552; Found: 489.0574.

**Chiral HPLC**: The ee value was 92%,  $t_R$  (minor) = 6.3 min,  $t_S$  (major) = 7.5 min (Chiralpak IA,  $\lambda$  = 254 nm, 3% isopropanol/hexanes, flow rate = 0.8 mL/min).

**(S)-1-(benzylthio)propylferrocene (27)**

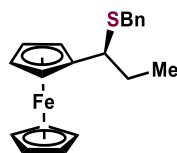

**TLC**:  $R_f$  = 0.45 (petroleum ether/Ethyl acetate = 20/1); 68 mg, yield: 97%; yellow oil.

**$^1H$  NMR** (400 MHz,  $CDCl_3$ )  $\delta$  7.33 – 7.28 (m, 4H), 7.25 – 7.21 (m, 1H), 4.14 – 4.12 (m, 9H), 3.67 – 3.58 (m, 2H), 3.40 (dd,  $J$  = 9.1, 4.2 Hz, 1H), 2.20 – 2.09 (m, 1H), 1.83 – 1.72 (m, 1H), 1.09 (t,  $J$  = 7.4 Hz, 3H).

**$^{13}C$  NMR** (101 MHz,  $CDCl_3$ )  $\delta$  138.6, 128.9, 128.3, 126.7, 91.6, 68.7, 67.7, 67.4, 67.3, 66.6, 46.3, 34.9, 28.0, 12.2.

**HRMS** (ESI-TOF)  $m/z$ :  $[M+H]^+$  Calcd for  $C_{20}H_{23}FeS$  351.0859; Found: 351.0853.

**Chiral HPLC**: The ee value was 90%,  $t_R$  (minor) = 12.4 min,  $t_S$  (major) = 15.2 min (Chiralpak OJ-H,  $\lambda$  = 254 nm, 3% isopropanol/hexanes, flow rate = 0.8 mL/min).

**(S)-1-(benzylthio)butylferrocene (28)**

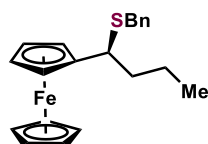

**TLC**:  $R_f$  = 0.43 (petroleum ether/Ethyl acetate = 20/1); 70 mg, yield: 96%; yellow oil.

**$^1H$  NMR** (400 MHz,  $CDCl_3$ )  $\delta$  7.30 – 7.25 (m, 4H), 7.24 – 7.18 (m, 1H), 4.13 – 4.09 (m, 9H), 3.63 – 3.54 (m, 2H), 3.45 (dd,  $J$  = 9.5, 4.1 Hz, 1H), 2.07 – 1.99 (m, 1H), 1.78 – 1.69 (m, 1H), 1.66 – 1.55 (m, 1H), 1.51 – 1.43 (m, 1H), 0.92 (t,  $J$  = 7.3 Hz, 3H).

**$^{13}C$  NMR** (101 MHz,  $CDCl_3$ )  $\delta$  138.6, 128.9, 128.3, 126.7, 91.8, 68.7, 67.7, 67.4, 67.3, 66.5, 44.0, 37.0, 34.9, 20.5, 13.9.

**HRMS** (ESI-TOF)  $m/z$ :  $[M+H]^+$  Calcd for  $C_{21}H_{25}FeS$  365.1015; Found: 365.1018.

**Chiral HPLC**: The ee value was 94%,  $t_S$  (major) = 6.7 min,  $t_R$  (minor) = 7.6 min (Chiralpak OD-H,  $\lambda$  = 254 nm, 3% isopropanol/hexanes, flow rate = 0.8 mL/min).

**(S,*p*R)-2-(1-Benzylthio)-1-diphenylphosphino-ferrocene (29)**

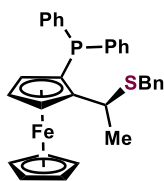

**TLC:**  $R_f = 0.41$  (petroleum ether/Ethyl acetate=20/1); 42 mg, yield: 40%; yellow oil.

**$^1\text{H NMR}$**  (400 MHz,  $\text{CDCl}_3$ )  $\delta$  7.63 – 7.59 (m, 2H), 7.39 – 7.37 (m, 3H), 7.28 – 7.22 (m, 5H), 7.18 – 7.14 (m, 3H), 7.01 – 6.98 (m, 2H), 4.44 – 4.42 (m, 1H), 4.36 (t,  $J = 2.5$  Hz, 1H), 4.18 – 4.12 (m, 1H), 4.00 – 3.99 (m, 1H), 3.91 (s, 5H), 3.54 (d,  $J = 12.7$  Hz, 1H), 3.44 (d,  $J = 12.7$  Hz, 1H), 1.73 (d,  $J = 7.0$  Hz, 3H).

**$^{13}\text{C NMR}$**  (101 MHz,  $\text{CDCl}_3$ )  $\delta$  140.4, 140.4, 138.3, 138.2, 138.1, 135.5, 135.3, 132.7, 129.1, 128.9, 128.2, 128.0, 128.0, 127.6, 127.5, 126.6, 97.7, 97.4, 74.6, 74.5, 71.6, 71.5, 69.6, 69.2, 68.6, 68.6, 38.4, 38.3, 35.6, 22.1.

**HRMS** (ESI-TOF)  $m/z$ :  $[\text{M}+\text{H}]^+$  Calcd for  $\text{C}_{31}\text{H}_{30}\text{FePS}$  521.1144; Found: 521.1169.

**Chiral HPLC:** The ee value was 99%,  $t_S$  (major) = 6.1 min,  $t_R$  (minor) = 6.7 min (Chiralpak IA,  $\lambda = 254$  nm, 10% isopropanol/hexanes, flow rate = 1.0 mL/min).

**(*S,pR*)-2-(1-Benzylthio)-1-phenylthio-ferrocene (30)**

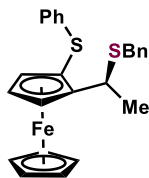

**TLC:**  $R_f = 0.5$  (petroleum ether/Ethyl acetate=20/1); 77 mg yield: 87%; yellow oil.

**$^1\text{H NMR}$**  (400 MHz,  $\text{CDCl}_3$ )  $\delta$  7.23 – 7.16 (m, 7H), 7.11 – 7.07 (m, 1H), 7.06 – 7.02 (m, 2H), 4.54 (dd,  $J = 2.2, 1.7$  Hz, 1H), 4.40 – 4.39 (m, 2H), 4.22 (s, 5H), 3.94 (q,  $J = 7.0$  Hz, 1H), 3.58 – 3.48 (m, 2H), 1.73 (d,  $J = 7.0$  Hz, 3H).

**$^{13}\text{C NMR}$**  (101 MHz,  $\text{CDCl}_3$ )  $\delta$  140.2, 138.0, 128.7, 128.3, 128.1, 126.6, 125.9, 124.6, 95.0, 75.6, 74.0, 70.2, 68.7, 67.4, 37.0, 36.0, 22.2.

**HRMS** (ESI-TOF)  $m/z$ :  $[\text{M}+\text{Na}]^+$  Calcd for  $\text{C}_{25}\text{H}_{24}\text{FeS}_2\text{Na}$  467.0555; Found: 467.0563.

**Chiral HPLC:** The ee value was 99%,  $t_S$  (major) = 6.2 min,  $t_R$  (minor) = 7.4 min (Chiralpak IA,  $\lambda = 254$  nm, 10% isopropanol/hexanes, flow rate = 1.0 mL/min).

**(*S*)-2-(benzylthio)-2-phenylethylferrocene (31)**

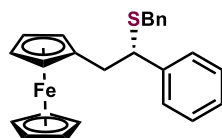

**TLC:**  $R_f = 0.65$  (petroleum ether/Ethyl acetate = 8/1); 44 mg, yield: 53%; yellow oil.

**$^1\text{H NMR}$**  (400 MHz,  $\text{CDCl}_3$ )  $\delta$  7.34 – 7.32 (m, 4H), 7.30 – 7.25 (m, 1H), 4.53 – 4.40 (m, 3H), 4.28 – 4.27 (m, 1H), 4.21 – 4.20 (m, 1H), 4.19 – 4.15 (m, 2H), 4.13 (s, 5H), 1.61 (d,  $J = 6.4$  Hz, 3H).

**$^{13}\text{C NMR}$**  (101 MHz,  $\text{CDCl}_3$ )  $\delta$  142.3, 138.3, 128.9, 128.3, 128.3, 128.2, 127.1, 126.8, 85.3, 69.1, 69.0, 68.5, 67.3, 67.3, 50.6, 37.6, 35.7.

**HRMS** (ESI-TOF)  $m/z$ :  $[\text{M}+\text{Na}]^+$   $\text{C}_{25}\text{H}_{24}\text{FeSNa}$  Calcd for 435.0834; Found: 435.0849.

**Chiral HPLC:** The ee value was 50%,  $t_R$  (minor) = 9.3 min,  $t_S$  (major) = 12.4 min (Chiralpak OJ-H,  $\lambda = 254$  nm, 10% isopropanol/hexanes, flow rate = 1.0 mL/min).

**(S)-1-(1-(benzylthio)ethyl)-1'-bromoferrocene (32)**

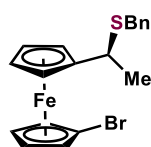

**TLC:**  $R_f = 0.68$  (petroleum ether/Ethyl acetate=20/1); 68 mg yield: 82%; yellow oil.

**$^1\text{H NMR}$**  (400 MHz,  $\text{CDCl}_3$ )  $\delta$  7.34 – 7.28 (m, 4H), 7.25 – 7.21 (m, 1H), 4.37 – 4.35 (m, 2H), 4.21 – 4.18 (m, 2H), 4.14 – 4.12 (m, 2H), 4.09 – 4.06 (m, 2H), 3.73 – 3.64 (m, 3H), 1.65 (d,  $J = 6.9$  Hz, 3H).

**$^{13}\text{C NMR}$**  (101 MHz,  $\text{CDCl}_3$ )  $\delta$  138.4, 128.8, 128.4, 126.8, 93.0, 77.9, 70.8, 70.7, 70.5, 70.4, 68.6, 68.3, 67.8, 67.8, 37.9, 35.5, 21.3.

**HRMS** (ESI-TOF)  $m/z$ :  $[\text{M}]^+$  Calcd for  $\text{C}_{19}\text{H}_{19}\text{BrFeS}$  413.9734; Found: 413.9731.

**Chiral HPLC:** The ee value was 95%,  $t_R$  (minor) = 27 min,  $t_S$  (major) = 37.4 min (Chiralpak OJ-H,  $\lambda = 254$  nm, 3% isopropanol/hexanes, flow rate = 0.8 mL/min).

**(S)-1-(1-(benzylthio)ethyl)-1'-ethylferrocene (33)**

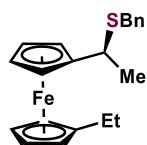

**TLC:**  $R_f = 0.7$  (petroleum ether/Ethyl acetate=20/1); 62 mg yield: 85%; yellow oil.

**<sup>1</sup>H NMR** (400 MHz, CDCl<sub>3</sub>) δ 7.35 – 7.29 (m, 4H), 7.26 – 7.22 (m, 1H), 4.15 – 4.12 (m, 1H), 4.10 – 4.01 (m, 7H), 3.73 – 3.62 (m, 3H), 2.35 – 2.29 (m, 2H), 1.66 – 1.63 (m, 3H), 1.20 – 1.13 (m, 3H).

**<sup>13</sup>C NMR** (101 MHz, CDCl<sub>3</sub>) δ 138.6, 128.8, 128.4, 126.8, 91.3, 69.2, 68.5, 68.4, 68.3, 68.3, 68.1, 67.9, 67.8, 66.2, 38.5, 35.4, 22.1, 21.3, 14.8.

**HRMS** (ESI-TOF) m/z: [M]<sup>+</sup> Calcd for C<sub>21</sub>H<sub>24</sub>FeS 364.0942; Found: 364.0991.

**Chiral HPLC:** The ee value was 95%, *t*<sub>R</sub> (minor) = 13.4 min, *t*<sub>S</sub> (major) = 15.2 min (Chiralpak OJ-H, λ = 254 nm, 3% isopropanol/hexanes, flow rate = 0.8 mL/min).

**(S)-1-(benzylthio)ethylruthenocene (34)**

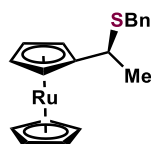

**TLC:** R<sub>f</sub> = 0.68 (petroleum ether/Ethyl acetate = 8/1); 64 mg, yield: 84%; colorless oil.

**<sup>1</sup>H NMR** (400 MHz, CDCl<sub>3</sub>) δ 7.35 – 7.28 (m, 4H), 7.25 – 7.21 (m, 1H), 4.66 – 4.65 (m, 1H), 4.56 – 4.53 (m, 6H), 4.52 – 4.51 (m, 1H), 4.50 – 4.48 (m, 1H), 3.72 (d, *J* = 2.7 Hz, 2H), 3.44 (q, *J* = 6.9 Hz, 1H), 1.47 (d, *J* = 6.9 Hz, 3H).

**<sup>13</sup>C NMR** (101 MHz, CDCl<sub>3</sub>) δ 138.5, 128.8, 128.4, 126.8, 95.4, 70.8, 70.6, 70.0, 69.4, 68.7, 38.0, 35.8, 22.3.

**HRMS** (ESI-TOF) m/z: [M+Na]<sup>+</sup> C<sub>19</sub>H<sub>20</sub>RuSNa Calcd for 405.0221; Found: 405.0225.

**Chiral HPLC:** The ee value was 93%, *t*<sub>S</sub> (major) = 5.8 min, *t*<sub>R</sub> (minor) = 6.4 min (Chiralpak IC, λ = 254 nm, 3% isopropanol/hexanes, flow rate = 0.8 mL/min).

**(S)-1-(benzyloxy)ethylferrocene (35)**

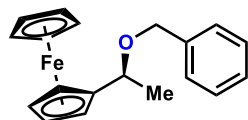

**TLC:** R<sub>f</sub> = 0.68 (petroleum ether/Ethyl acetate = 8:1); 38 mg, yield: 59%; yellow oil.

**<sup>1</sup>H NMR** (400 MHz, CDCl<sub>3</sub>) δ 7.34 – 7.32 (m, 4H), 7.30 – 7.25 (m, 1H), 4.53 – 4.40 (m, 3H), 4.28 – 4.27 (m, 1H), 4.21 – 4.20 (m, 1H), 4.19 – 4.15 (m, 2H), 4.13 (s, 5H), 1.61 (d, *J* = 6.4 Hz, 3H).

**<sup>13</sup>C NMR** (101 MHz, CDCl<sub>3</sub>) δ 139.0, 128.3, 127.5, 127.3, 89.4, 72.7, 69.5, 68.7, 68.6, 68.0, 67.6, 65.9, 20.6.

**HRMS** (ESI-TOF)  $m/z$ :  $[M]^+$  Calcd for  $C_{19}H_{20}FeO$  320.0858; Found: 320.0864.

**Chiral HPLC**: The ee value was 98%,  $t_R$  (minor) = 14.0 min,  $t_S$  (major) = 14.7 min (Chiralpak OJ-H,  $\lambda$  = 254 nm, 3% isopropanol/hexanes, flow rate = 0.8 mL/min).

**(S)-1-((2-methylbenzyl)oxy)ethylferrocene (36)**

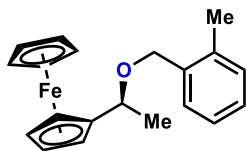

**TLC**:  $R_f$  = 0.71 (petroleum ether/Ethyl acetate = 8/1); 50 mg, yield: 75%; yellow oil.

**$^1H$  NMR** (400 MHz,  $CDCl_3$ )  $\delta$  7.36 – 7.34 (m, 1H), 7.22 – 7.16 (m, 3H), 4.53 – 4.42 (m, 3H), 4.30 (s, 1H), 4.25 (s, 1H), 4.22 – 4.19 (m, 2H), 4.17 (s, 5H), 2.31 (s, 3H), 1.65 (d,  $J$  = 6.4 Hz, 3H).

**$^{13}C$  NMR** (101 MHz,  $CDCl_3$ )  $\delta$  136.7, 136.6, 130.1, 128.5, 127.5, 125.7, 89.4, 72.9, 68.7, 68.6, 68.2, 68.0, 67.5, 65.9, 20.6, 18.8.

**HRMS** (ESI-TOF)  $m/z$ :  $[M+Na]^+$  Calcd for  $C_{20}H_{22}FeONa$  357.0906; Found: 357.0900.

**Chiral HPLC**: The ee value was 97%,  $t_R$  (minor) = 5.6 min,  $t_S$  (major) = 6.2 min (Chiralpak IF,  $\lambda$  = 254 nm, 3% isopropanol/hexanes, flow rate = 0.8 mL/min).

**(S)-1-((4-methylbenzyl)oxy)ethylferrocene (37)**

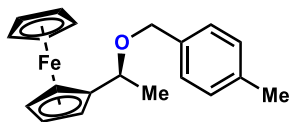

**TLC**:  $R_f$  = 0.68 (petroleum ether/Ethyl acetate = 8/1); 49 mg, yield: 74%; yellow oil.

**$^1H$  NMR** (400 MHz,  $CDCl_3$ )  $\delta$  7.23 (d,  $J$  = 8.0 Hz, 2H), 7.16 (d,  $J$  = 7.8 Hz, 2H), 4.50 – 4.37 (m, 3H), 4.28 (s, 1H), 4.22 (s, 1H), 4.22 – 4.14 (m, 7H), 2.35 (s, 3H), 1.60 (d,  $J$  = 6.5 Hz, 3H).

**$^{13}C$  NMR** (101 MHz,  $CDCl_3$ )  $\delta$  136.9, 135.9, 128.9, 127.6, 89.6, 72.4, 69.4, 68.70, 68.65, 68.0, 67.6, 65.9, 21.1, 20.6.

**HRMS** (ESI-TOF)  $m/z$ :  $[M]^+$  Calcd for  $C_{20}H_{22}FeO$  334.1014; Found: 334.1018.

**Chiral HPLC**: The ee value was 92%,  $t_S$  (major) = 6.4 min,  $t_R$  (minor) = 7.4 min (Chiralpak IA,  $\lambda$  = 254 nm, 3% isopropanol/hexanes, flow rate = 0.8 mL/min).

**(S)-1-((4-methoxybenzyl)oxy)ethylferrocene (38)**

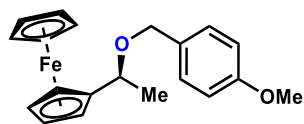

**TLC:**  $R_f = 0.52$  (petroleum ether/Ethyl acetate = 8/1); 56 mg, yield: 80%; yellow oil.

**$^1\text{H NMR}$**  (400 MHz,  $\text{CDCl}_3$ )  $\delta$  7.25 (d,  $J = 8.6$  Hz, 2H), 6.87 (d,  $J = 8.6$  Hz, 2H), 4.46 – 4.36 (m, 3H), 4.27 – 4.26 (m, 1H), 4.21 – 4.19 (m, 1H), 4.18 – 4.11 (m, 7H), 3.80 (s, 3H), 1.59 (d,  $J = 6.4$  Hz, 3H).

**$^{13}\text{C NMR}$**  (101 MHz,  $\text{CDCl}_3$ )  $\delta$  158.9, 131.1, 129.1, 113.7, 89.6, 72.4, 69.2, 68.7, 68.6, 67.9, 67.6, 65.9, 55.2, 20.6.

**HRMS** (ESI-TOF)  $m/z$ :  $[\text{M}]^+$  Calcd for  $\text{C}_{20}\text{H}_{22}\text{FeO}_2$  350.0963; Found: 350.0968.

**Chiral HPLC:** The ee value was 96%,  $t_S$  (major) = 8.7 min,  $t_R$  (minor) = 10.1 min (Chiralpak IA,  $\lambda = 254$  nm, 3% isopropanol/hexanes, flow rate = 0.8 mL/min).

**(S)-1-((4-(trifluoromethyl)benzyl)oxy)ethylferrocene (39)**

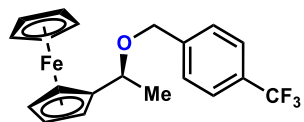

**TLC:**  $R_f = 0.64$  (petroleum ether/Ethyl acetate = 8/1); 39 mg, yield: 50%; yellow oil.

**$^1\text{H NMR}$**  (400 MHz,  $\text{CDCl}_3$ )  $\delta$  7.58 (d,  $J = 8.1$  Hz, 2H), 7.43 (d,  $J = 8.0$  Hz, 2H), 4.51 (q,  $J = 12.6$  Hz, 2H), 4.42 (q,  $J = 6.5$  Hz, 1H), 4.29 – 4.27 (m, 1H), 4.21 – 4.18 (m, 3H), 4.15 (s, 5H), 1.63 (d,  $J = 6.4$  Hz, 3H).

**$^{13}\text{C NMR}$**  (101 MHz,  $\text{CDCl}_3$ )  $\delta$  143.2, 127.4, 125.6, 125.2, 125.2, 125.2, 125.1, 122.8, 88.9, 73.33, 68.7, 68.7, 68.7, 68.2, 67.7, 65.9, 20.6.

**$^{19}\text{F NMR}$**  (376 MHz,  $\text{CDCl}_3$ )  $\delta$  -62.3

**HRMS** (ESI-TOF)  $m/z$ :  $[\text{M}]^+$  Calcd for  $\text{C}_{20}\text{H}_{19}\text{F}_3\text{FeO}$  388.0732; Found: 388.0737.

**Chiral HPLC:** The ee value was 99%,  $t_S$  (major) = 6.4 min,  $t_R$  (minor) = 7.2 min (Chiralpak IA,  $\lambda = 254$  nm, 3% isopropanol/hexanes, flow rate = 0.8 mL/min).

**(S)-1-(phenylselanyl)ethylferrocene (40)**

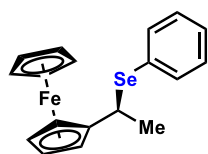

**TLC:**  $R_f = 0.57$  (PE); 34 mg, yield: 46%; yellow oil.

**$^1\text{H}$  NMR** (400 MHz,  $\text{CDCl}_3$ )  $\delta$  7.50 – 7.47 (m, 2H), 7.29 – 7.23 (m, 3H), 4.26 (q,  $J$  = 7.0 Hz, 1H), 4.14 – 4.09 (m, 8H), 4.01 (dt,  $J$  = 2.5, 1.3 Hz, 1H), 1.76 (d,  $J$  = 7.0 Hz, 3H).

**$^{13}\text{C}$  NMR** (101 MHz,  $\text{CDCl}_3$ )  $\delta$  135.6, 130.0, 128.7, 127.6, 91.5, 68.6, 67.9, 67.7, 67.5, 65.7, 38.5, 21.8.

**HRMS** (ESI-TOF)  $m/z$ :  $[\text{M}+\text{K}]^+$  Calcd for  $\text{C}_{18}\text{H}_{18}\text{FeSeK}$  408.9549; Found: 408.9542.

**Chiral HPLC**: The ee value was 78%,  $t_{\text{R}}$  (minor) = 10.5 min,  $t_{\text{S}}$  (major) = 12.3 min (Chiralpak OJ-H,  $\lambda$  = 254 nm, 3% isopropanol/hexanes, flow rate = 0.8 mL/min).

**(S)-1-(naphthalen-1-ylselanyl)ethylferrocene (41)**

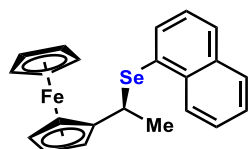

**TLC**:  $R_f$  = 0.37 (PE); 37 mg, yield: 44%; yellow oil.

**$^1\text{H}$  NMR** (400 MHz,  $\text{CDCl}_3$ )  $\delta$  8.48 (d,  $J$  = 7.4 Hz, 1H), 7.84 (d,  $J$  = 8.9 Hz, 2H), 7.78 (d,  $J$  = 7.0 Hz, 1H), 7.56 – 7.49 (m, 2H), 7.37 – 7.34 (m, 1H), 4.29 (q,  $J$  = 7.0 Hz, 1H), 4.18 – 4.17 (m, 1H), 4.15 – 4.10 (m, 6H), 4.05 – 4.04 (m, 1H), 3.92 – 3.90 (m, 1H), 1.72 (d,  $J$  = 6.9 Hz, 3H).

**$^{13}\text{C}$  NMR** (101 MHz,  $\text{CDCl}_3$ )  $\delta$  135.9, 134.0, 130.0, 129.3, 128.8, 128.6, 126.7, 126.2, 125.7, 91.7, 68.7, 68.0, 67.8, 67.7, 65.8, 38.8, 22.0.

**HRMS** (ESI-TOF)  $m/z$ :  $[\text{M}]^+$  Calcd for  $\text{C}_{22}\text{H}_{20}\text{FeSe}$  420.0080; Found: 420.0078.

**Chiral HPLC**: The ee value was 56%,  $t_{\text{R}}$  (minor) = 13.3 min,  $t_{\text{S}}$  (major) = 16.8 min (Chiralpak OJ-H,  $\lambda$  = 254 nm, 3% isopropanol/hexanes, flow rate = 0.8 mL/min).

**(S)-N-(1-(ferrocene-2-yl)ethyl)benzenesulfonamide (42)**

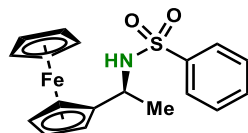

**TLC**:  $R_f$  = 0.45 (petroleum ether/Ethyl acetate = 5/1); 60 mg, yield: 81%; yellow solid.

**$^1\text{H}$  NMR** (400 MHz,  $\text{CDCl}_3$ )  $\delta$  7.93 – 7.91 (m, 2H), 7.62 – 7.51 (m, 3H), 4.82 (d,  $J$  = 7.4 Hz, 1H), 4.20 – 4.17 (m, 1H), 4.13 – 4.10 (m, 5H), 4.08 – 4.05 (m, 2H), 3.94 – 3.93 (m, 1H), 3.88 – 3.87 (m, 1H), 1.42 (d,  $J$  = 6.6 Hz, 3H).

$^{13}\text{C}$  NMR (101 MHz,  $\text{CDCl}_3$ )  $\delta$  140.9, 132.6, 129.1, 127.0, 90.8, 68.5, 68.1, 68.0, 67.0, 65.6, 48.5, 22.1.

**HRMS** (ESI-TOF)  $m/z$ :  $[\text{M}+\text{H}]^+$  Calcd for  $\text{C}_{18}\text{H}_{20}\text{FeNO}_2\text{S}$  370.0553; Found: 370.0601.

**Chiral HPLC**: The ee value was 92%,  $t_{\text{S}}$  (major) = 17.4 min,  $t_{\text{R}}$  (minor) = 19.1 min (Chiralpak IA,  $\lambda$  = 254 nm, 15% isopropanol/hexanes, flow rate = 1.0 mL/min).

**(S)-4-methyl-N-(1-(ferrocene-2-yl)ethyl)benzenesulfonamide (43)**

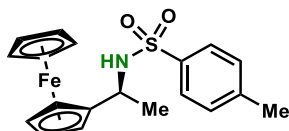

**TLC**:  $R_f$  = 0.27 (petroleum ether/Ethyl acetate = 5:1); 70 mg, yield: 91%; yellow solid.

$^1\text{H}$  NMR (400 MHz,  $\text{CDCl}_3$ )  $\delta$  7.82 – 7.78 (m, 2H), 7.33 – 7.30 (m, 2H), 4.80 (d,  $J$  = 7.3 Hz, 1H), 4.18–4.12 (m, 6H), 4.09 – 4.07 (m, 2H), 3.96 – 3.95 (m, 1H), 3.92–3.91(m, 1H), 2.44 (s, 3H), 1.40 (d,  $J$  = 6.7 Hz, 3H).

$^{13}\text{C}$  NMR (101 MHz,  $\text{CDCl}_3$ )  $\delta$  143.2, 137.9, 129.7, 127.0, 90.9, 68.5, 68.0, 67.9, 66.9, 65.6, 48.3, 22.1, 21.5.

**HRMS** (ESI-TOF)  $m/z$ :  $[\text{M}+\text{K}]^+$  Calcd for  $\text{C}_{19}\text{H}_{21}\text{FeNO}_2\text{SK}$  422.0268; Found: 422.0271.

**Chiral HPLC**: The ee value was 95%,  $t_{\text{R}}$  (minor) = 14.2 min,  $t_{\text{S}}$  (major) = 18.7 min (Chiralpak IF,  $\lambda$  = 254 nm, 15% isopropanol/hexanes, flow rate = 1.0 mL/min).

**(S)-4-methoxy-N-(1-(ferrocene-2-yl)ethyl)benzenesulfonamide (44)**

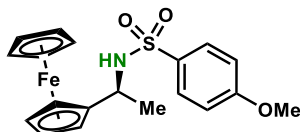

**TLC**:  $R_f$  = 0.21 (petroleum ether/Ethyl acetate = 5/1); 70 mg, yield: 88%; yellow solid.

$^1\text{H}$  NMR (400 MHz,  $\text{CDCl}_3$ )  $\delta$  7.87 – 7.83 (m, 2H), 7.00 – 6.96 (m, 2H), 4.83 (d,  $J$  = 7.3 Hz, 1H), 4.14 – 4.11 (m, 6H), 4.08 (t,  $J$  = 1.9 Hz, 2H), 3.96 (q,  $J$  = 1.6 Hz, 1H), 3.90 (q,  $J$  = 1.7 Hz, 1H), 3.87 (s, 3H), 1.40 (d,  $J$  = 6.6 Hz, 3H).

$^{13}\text{C}$  NMR 162.7, 132.5, 129.1, 114.2, 91.0, 68.5, 68.0, 67.9, 67.0, 65.6, 55.6, 48.3, 22.1.

**HRMS** (ESI-TOF)  $m/z$ :  $[\text{M}+\text{Na}]^+$  Calcd for  $\text{C}_{19}\text{H}_{21}\text{FeNO}_3\text{SNa}$  422.0478; Found: 422.0485.

**Chiral HPLC:** The ee value was 97%,  $t_S$  (major) = 34.1 min,  $t_R$  (minor) = 45.2 min (Chiralpak IF,  $\lambda$  = 254 nm, 15% isopropanol/hexanes, flow rate = 1.0 mL/min).

**(S)-4-(tert-butyl)-N-(1-(ferrocene-2-yl)ethyl)benzenesulfonamide (45)**

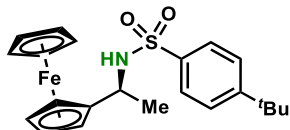

**TLC:**  $R_f$  = 0.43 (petroleum ether/Ethyl acetate = 5/1); 76 mg, yield: 89%; yellow solid.

**$^1\text{H NMR}$**  (400 MHz,  $\text{CDCl}_3$ )  $\delta$  7.85 – 7.82 (m, 2H), 7.54 – 7.50 (m, 2H), 4.91 (d,  $J$  = 7.4 Hz, 1H), 4.21 – 4.15 (m, 1H), 4.11 (s, 5H), 4.07 – 4.04 (m, 2H), 3.96 – 3.95 (m, 1H), 3.90 – 3.88 (m, 1H), 1.41 (d,  $J$  = 6.7 Hz, 3H), 1.34 (s, 9H).

**$^{13}\text{C NMR}$**  (101 MHz,  $\text{CDCl}_3$ )  $\delta$  156.3, 137.8, 126.8, 126.0, 90.9, 68.5, 67.9, 67.9, 66.9, 65.6, 48.4, 35.1, 31.1, 22.2.

**HRMS** (ESI-TOF)  $m/z$ :  $[\text{M}+\text{Na}]^+$  Calcd for  $\text{C}_{22}\text{H}_{27}\text{FeNO}_2\text{SNa}$  448.0998; Found: 448.1006.

**Chiral HPLC:** The ee value was 93%,  $t_R$  (minor) = 14.2 min,  $t_S$  (major) = 17.3 min (Chiralpak IA,  $\lambda$  = 254 nm, 15% isopropanol/hexanes, flow rate = 1.0 mL/min).

**(S)-4-fluoro-N-(1-(ferrocene-2-yl)ethyl)benzenesulfonamide (46)**

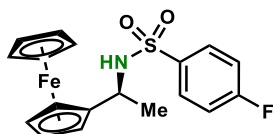

**TLC:**  $R_f$  = 0.37 (petroleum ether/Ethyl acetate = 5/1); 53 mg, yield: 69%; yellow solid.

**$^1\text{H NMR}$**  (400 MHz,  $\text{CDCl}_3$ )  $\delta$  7.94 – 7.89 (m, 2H), 7.22 – 7.16 (m, 2H), 4.92 (d,  $J$  = 7.5 Hz, 1H), 4.19 (q,  $J$  = 6.9 Hz, 1H), 4.13 (s, 5H), 4.09 – 4.07 (m, 2H), 3.96 – 3.94 (m, 1H), 3.89 – 3.88 (m, 1H), 1.42 (d,  $J$  = 6.7 Hz, 3H).

**$^{13}\text{C NMR}$**  (101 MHz,  $\text{CDCl}_3$ )  $\delta$  166.1, 163.6, 137.1, 137.1, 129.7, 129.6, 116.4, 116.1, 90.5, 68.5, 68.1, 68.0, 67.1, 65.5, 48.6, 22.0.

**$^{19}\text{F NMR}$**  (376 MHz,  $\text{CDCl}_3$ )  $\delta$  -105.29.

**HRMS** (ESI-TOF)  $m/z$ :  $[\text{M}+\text{Na}]^+$  Calcd for  $\text{C}_{18}\text{H}_{18}\text{FFeNO}_2\text{SNa}$  410.0278; Found: 410.0279.

**Chiral HPLC:** The ee value was 97%,  $t_S$  (major) = 11.7 min,  $t_R$  (minor) = 16.1 min (Chiralpak IF,  $\lambda$  = 254 nm, 25% isopropanol/hexanes, flow rate = 1.0 mL/min).

**(S)-4-chloro-N-(1-(ferrocene-2-yl)ethyl)benzenesulfonamide (47)**

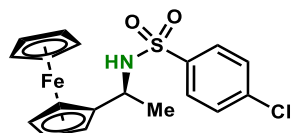

**TLC:**  $R_f$  = 0.4 (petroleum ether/Ethyl acetate = 5/1); 60 mg, yield: 74%; yellow solid.

**$^1\text{H}$  NMR** (400 MHz,  $\text{CDCl}_3$ )  $\delta$  7.89 – 7.80 (m, 2H), 7.52 – 7.44 (m, 2H), 4.86 (d,  $J$  = 7.5 Hz, 1H), 4.20 (q,  $J$  = 7.0 Hz, 1H), 4.14 (s, 5H), 4.09 (dd,  $J$  = 2.5, 1.3 Hz, 2H), 3.97 – 3.94 (m, 1H), 3.92 – 3.89 (m, 1H), 1.43 (d,  $J$  = 6.7 Hz, 3H).

**$^{13}\text{C}$  NMR** (101 MHz,  $\text{CDCl}_3$ )  $\delta$  139.6, 138.9, 129.3, 128.5, 90.6, 68.6, 68.2, 68.1, 67.1, 65.5, 48.6, 22.1.

**HRMS** (ESI-TOF)  $m/z$ :  $[\text{M}+\text{Na}]^+$  Calcd for  $\text{C}_{18}\text{H}_{18}\text{ClFeNO}_2\text{SNa}$  425.9982; Found: 425.9988.

**Chiral HPLC:** The ee value was 95%,  $t_S$  (major) = 12.1 min,  $t_R$  (minor) = 16.8 min (Chiralpak IF,  $\lambda$  = 254 nm, 25% isopropanol/hexanes, flow rate = 1.0 mL/min).

**(S)-4-bromo-N-(1-(ferrocene-2-yl)ethyl)benzenesulfonamide (48)**

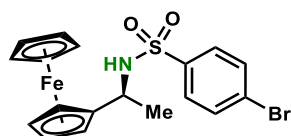

**TLC:**  $R_f$  = 0.38 (petroleum ether/Ethyl acetate = 5/1); 45 mg, yield: 50%; yellow solid.

**$^1\text{H}$  NMR** (400 MHz,  $\text{CDCl}_3$ )  $\delta$  7.78 – 7.74 (m, 2H), 7.67 – 7.63 (m, 2H), 4.91 (d,  $J$  = 7.5 Hz, 1H), 4.19 (dd,  $J$  = 7.8, 6.2 Hz, 1H), 4.14 (s, 5H), 4.11 – 4.08 (m, 3H), 3.96 – 3.95 (m, 1H), 3.91 – 3.90 (m, 1H), 1.42 (d,  $J$  = 6.6 Hz, 3H).

**$^{13}\text{C}$  NMR** (101 MHz,  $\text{CDCl}_3$ )  $\delta$  140.1, 132.3, 128.5, 127.4, 90.5, 68.5, 68.2, 68.1, 67.1, 65.5, 48.6, 22.1.

**HRMS** (ESI-TOF)  $m/z$ :  $[\text{M}+\text{Na}]^+$  Calcd for  $\text{C}_{18}\text{H}_{18}\text{BrFeNO}_2\text{SNa}$  469.9477; Found: 469.9482.

**Chiral HPLC:** The ee value was 97%,  $t_S$  (major) = 12.9 min,  $t_R$  (minor) = 18.2 min (Chiralpak IF,  $\lambda$  = 254 nm, 25% isopropanol/hexanes, flow rate = 1.0 mL/min).

**(S)-4-iodo-N-(1-(ferrocene-2-yl)ethyl)benzenesulfonamide (49)**

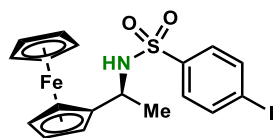

**TLC:**  $R_f = 0.4$  (petroleum ether/Ethyl acetate = 5/1); 49 mg, yield: 49%; yellow solid.

**$^1\text{H NMR}$**  (400 MHz,  $\text{CDCl}_3$ )  $\delta$  7.88 – 7.85 (m, 2H), 7.62 – 7.59 (m, 2H), 4.87 (d,  $J = 7.5$  Hz, 1H), 4.21 – 4.17 (m, 1H), 4.14 (s, 5H), 4.11 – 4.09 (m, 2H), 3.96 – 3.95 (m, 1H), 3.92 – 3.91 (m, 1H), 1.42 (d,  $J = 6.6$  Hz, 3H).

**$^{13}\text{C NMR}$**  (101 MHz,  $\text{CDCl}_3$ )  $\delta$  140.8, 138.3, 128.4, 100.0, 90.5, 68.5, 68.2, 68.1, 67.1, 65.5, 48.6, 22.1.

**HRMS** (ESI-TOF)  $m/z$ :  $[\text{M}+\text{Na}]^+$  Calcd for  $\text{C}_{18}\text{H}_{18}\text{FeINO}_2\text{SNa}$  517.9339; Found: 517.9323.

**Chiral HPLC:** The ee value was 93%,  $t_R$  (minor) = 21.9 min,  $t_S$  (major) = 24.6 min (Chiralpak IA,  $\lambda = 254$  nm, 15% isopropanol/hexanes, flow rate = 1.0 mL/min).

**(S)-2-fluoro-N-(1-(ferrocene-2-yl)ethyl)benzenesulfonamide (50)**

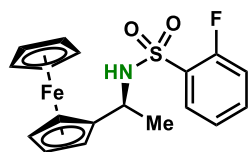

**TLC:**  $R_f = 0.35$  (petroleum ether/Ethyl acetate = 5/1); 34 mg, yield: 44%; yellow solid.

**$^1\text{H NMR}$**  (400 MHz,  $\text{CDCl}_3$ )  $\delta$  7.94 – 7.90 (m, 1H), 7.59 – 7.53 (m, 1H), 7.29 – 7.25 (m, 1H), 7.21 – 7.16 (m, 1H), 4.97 (d,  $J = 7.8$  Hz, 1H), 4.28 – 4.21 (m, 1H), 4.14 (s, 5H), 4.10 – 4.08 (m, 1H), 4.05 – 4.03 (m, 2H), 3.90 – 3.88 (m, 1H), 1.44 (d,  $J = 6.7$  Hz, 3H).

**$^{13}\text{C NMR}$**  (101 MHz,  $\text{CDCl}_3$ )  $\delta$  160.0, 157.5, 134.8, 134.7, 130.0, 129.3, 129.1, 124.4, 124.4, 117.0, 116.8, 90.3, 68.5, 68.1, 68.0, 67.3, 65.3, 48.8, 21.8.

**$^{19}\text{F NMR}$**  (376 MHz,  $\text{CDCl}_3$ )  $\delta$  -110.26.

**HRMS** (ESI-TOF)  $m/z$ :  $[\text{M}+\text{Na}]^+$  Calcd for  $\text{C}_{18}\text{H}_{18}\text{FFeNO}_2\text{SNa}$  410.0278; Found: 410.0290.

**Chiral HPLC:** The ee value was 93%,  $t_S$  (major) = 16.0 min,  $t_R$  (minor) = 22.5 min (Chiralpak IA,  $\lambda = 254$  nm, 15% isopropanol/hexanes, flow rate = 1.0 mL/min).

**3-fluoro-N-(1-(ferrocene-2-yl)ethyl)benzenesulfonamide (51)**

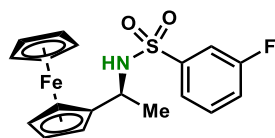

**TLC:**  $R_f = 0.35$  (petroleum ether/Ethyl acetate = 5/1); 49 mg, yield: 64%; yellow solid.

**$^1\text{H NMR}$**  (400 MHz,  $\text{CDCl}_3$ )  $\delta$  7.71 – 7.69 (m, 1H), 7.63 – 7.59 (m, 1H), 7.54 – 7.48 (m, 1H), 7.31 – 7.26 (m, 1H), 4.95 (d,  $J = 7.6$  Hz, 1H), 4.26 – 4.19 (m, 1H), 4.13 (s, 5H), 4.10 – 4.07 (m, 2H), 3.96 – 3.95 (m, 1H), 3.91 – 3.90 (m, 1H), 1.43 (d,  $J = 6.7$  Hz, 3H).

**$^{13}\text{C NMR}$**  (101 MHz,  $\text{CDCl}_3$ )  $\delta$  163.6, 161.1, 143.2, 143.1, 130.9, 130.9, 122.7, 122.7, 119.8, 119.6, 114.5, 114.3, 90.5, 68.5, 68.1, 68.1, 67.1, 65.5, 48.7, 22.1.

**$^{19}\text{F NMR}$**  (376 MHz,  $\text{CDCl}_3$ )  $\delta$  -109.44.

**HRMS** (ESI-TOF)  $m/z$ :  $[\text{M}+\text{Na}]^+$  Calcd for  $\text{C}_{18}\text{H}_{18}\text{FFeNO}_2\text{SNa}$  410.0278; Found: 410.0277.

**Chiral HPLC:** The ee value was 93%,  $t_R$  (minor) = 12.2 min,  $t_S$  (major) = 13.5 min (Chiralpak IA,  $\lambda = 254$  nm, 15% isopropanol/hexanes, flow rate = 1.0 mL/min).

**(S)-N-(1-(ferrocene-2-yl)ethyl)-4-(5-(p-tolyl)-3-(trifluoromethyl)-1H-pyrazol-1-yl)benzenesulfonamide (52)**

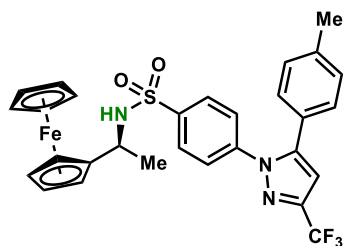

**TLC:**  $R_f = 0.27$  (petroleum ether/Ethyl acetate = 5/1); 65 mg, yield: 55%; yellow oil.

**$^1\text{H NMR}$**  (400 MHz,  $\text{CDCl}_3$ )  $\delta$  7.90 – 7.88 (m, 2H), 7.49 – 7.46 (m, 2H), 7.16 (d,  $J = 7.9$  Hz, 2H), 7.09 (d,  $J = 8.2$  Hz, 2H), 6.75 (s, 1H), 4.91 (d,  $J = 7.5$  Hz, 1H), 4.20 (q,  $J = 6.8$  Hz, 1H), 4.14 (s, 5H), 4.10 (t,  $J = 1.9$  Hz, 2H), 3.96 – 3.93 (m, 2H), 2.38 (s, 3H), 1.43 (d,  $J = 6.6$  Hz, 3H).

**$^{13}\text{C NMR}$**  (101 MHz,  $\text{CDCl}_3$ )  $\delta$  145.2, 144.6, 144.2, 143.8, 143.2, 142.3, 140.5, 139.7, 129.7, 128.7, 128.0, 125.7, 125.5, 125.1, 122.4, 119.7, 117.0, 106.3, 90.5, 68.6, 68.2, 68.1, 67.1, 65.5, 48.7, 22.0, 21.3.

$^{19}\text{F}$  NMR (376 MHz,  $\text{CDCl}_3$ )  $\delta$  -62.26.

**HRMS** (ESI-TOF)  $m/z$ :  $[\text{M}+\text{Na}]^+$  Calcd for  $\text{C}_{29}\text{H}_{26}\text{F}_3\text{FeN}_3\text{O}_2\text{SNa}$  616.0933; Found: 616.0936.

**Chiral HPLC**: The ee value was 92%,  $t_R$  (minor) = 13.5 min,  $t_S$  (major) = 17.0 min (Chiralpak IA,  $\lambda$  = 254 nm, 25% isopropanol/hexanes, flow rate = 1.0 mL/min).

**(S)-4-methyl-N'-(1-(ferrocene-2-yl)ethyl)benzenesulfonylhydrazide (53)**

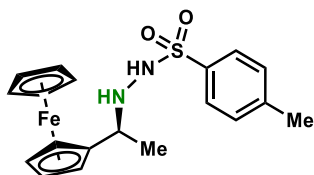

**TLC**:  $R_f$  = 0.32 (petroleum ether/Ethyl acetate = 5/1); 39 mg, yield: 49%; yellow solid.

$^1\text{H}$  NMR (400 MHz,  $\text{CDCl}_3$ )  $\delta$  7.38 (d,  $J$  = 8.0 Hz, 2H), 7.18 (d,  $J$  = 7.9 Hz, 2H), 4.14 – 4.09 (m, 8H), 3.99 (q,  $J$  = 7.1 Hz, 1H), 3.93 (s, 1H), 2.39 (s, 3H), 1.69 (d,  $J$  = 7.1 Hz, 3H).

$^{13}\text{C}$  NMR (101 MHz,  $\text{CDCl}_3$ )  $\delta$  144.3, 133.0, 129.6, 129.0, 70.7, 68.7, 68.6, 68.4, 66.9, 62.3, 21.6, 13.9.

**HRMS** (ESI-TOF)  $m/z$ :  $[\text{M}+\text{K}]^+$  Calcd for  $\text{C}_{19}\text{H}_{22}\text{FeN}_2\text{O}_2\text{SK}$  437.0378; Found: 437.0404.

**Chiral HPLC**: The ee value was 88%,  $t_R$  (minor) = 14.3 min,  $t_S$  (major) = 14.8 min (Chiralpak IA,  $\lambda$  = 254 nm, 10% isopropanol/hexanes, flow rate = 1.0 mL/min).

**(S)-4-methoxy-N'-(1-(ferrocene-2-yl)ethyl)benzenesulfonylhydrazide (54)**

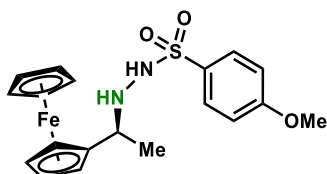

**TLC**:  $R_f$  = 0.3 (petroleum ether/Ethyl acetate = 5/1); 33 mg, yield: 40%; yellow solid.

$^1\text{H}$  NMR (400 MHz,  $\text{CDCl}_3$ )  $\delta$  7.42 – 7.39 (m, 2H), 6.86 – 6.83 (m, 2H), 4.14 – 4.10 (m, 8H), 3.98 (q,  $J$  = 7.1 Hz, 1H), 3.93 (s, 1H), 3.83 (s, 3H), 1.69 (d,  $J$  = 7.1 Hz, 3H).

$^{13}\text{C}$  NMR (101 MHz,  $\text{CDCl}_3$ )  $\delta$  163.5, 131.7, 126.2, 113.6, 81.4, 70.7, 68.7, 68.6, 68.4, 66.9, 62.4, 55.5, 14.0.

**HRMS** (ESI-TOF)  $m/z$ :  $[M+H]^+$  Calcd for  $C_{19}H_{23}FeN_2O_3S$  415.0768; Found: 415.0748.

**Chiral HPLC**: The ee value was 90%,  $t_R$  (minor) = 38.8 min,  $t_S$  (major) = 42.9 min (Chiralpak IF,  $\lambda$  = 254 nm, 10% isopropanol/hexanes, flow rate = 1.0 mL/min).

**(S)-5-bromo-6-methyl-1-(1-(ferrocene-2-yl)ethyl)-1H-indazole (55)**

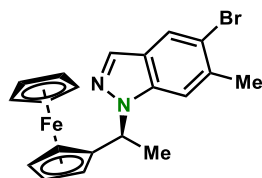

**TLC**:  $R_f$  = 0.46 (petroleum ether/Ethyl acetate = 8/1); 65 mg, yield: 77%; yellow solid.

**$^1H$  NMR** (400 MHz,  $CDCl_3$ )  $\delta$  7.89 (s, 1H), 7.87 (s, 1H), 7.28 (s, 1H), 5.67 (q,  $J$  = 7.0 Hz, 1H), 4.29 (d,  $J$  = 1.9 Hz, 1H), 4.16 (t,  $J$  = 2.1 Hz, 2H), 4.13 (s, 6H), 2.51 (s, 3H), 1.92 (d,  $J$  = 7.0 Hz, 3H).

**$^{13}C$  NMR** (101 MHz,  $CDCl_3$ )  $\delta$  138.0, 135.2, 131.5, 124.0, 117.1, 110.4, 89.1, 68.8, 68.4, 67.8, 67.6, 66.5, 54.6, 24.2, 20.0.

**HRMS** (ESI-TOF)  $m/z$ :  $[M+K]^+$  Calcd for  $C_{20}H_{19}BrFeN_2K$  460.9707; Found: 460.9708.

**Chiral HPLC**: The ee value was 99%,  $t_S$  (major) = 6.7 min,  $t_R$  (minor) = 12.8 min (Chiralcel OD-H,  $\lambda$  = 254 nm, 15% isopropanol/hexanes, flow rate = 1.0 mL/min).

**(S)-4-bromo-5-methyl-1-(1-(ferrocene-2-yl)ethyl)-1H-indazole (56)**

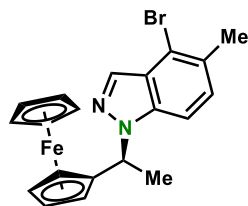

**TLC**:  $R_f$  = 0.49 (petroleum ether/Ethyl acetate = 8/1); 62 mg, yield: 73%; yellow solid.

**$^1H$  NMR** (400 MHz,  $CDCl_3$ )  $\delta$  7.96 (s, 1H), 7.24 (d,  $J$  = 8.5 Hz, 1H), 7.16 (d,  $J$  = 8.5 Hz, 1H), 5.69 (q,  $J$  = 7.0 Hz, 1H), 4.30 (s, 1H), 4.16 (s, 2H), 4.13 (s, 6H), 2.47 (s, 3H), 1.93 (d,  $J$  = 7.0 Hz, 3H)

**$^{13}C$  NMR** (101 MHz,  $CDCl_3$ )  $\delta$  137.7, 132.5, 129.1, 128.8, 125.9, 115.5, 108.6, 89.0, 68.8, 68.4, 67.8, 67.6, 66.5, 55.2, 21.4, 20.0.

**HRMS** (ESI-TOF)  $m/z$ :  $[M]^+$  Calcd for  $C_{20}H_{19}BrFeN_2$  422.0075; Found: 422.0074.

**Chiral HPLC**: The ee value was 96%,  $t_R$  (minor) = 5.7 min,  $t_S$  (major) = 6.0 min (Chiralpak IF,  $\lambda$  = 254 nm, 15% isopropanol/hexanes, flow rate = 1.0 mL/min).

**methyl (*S*)-1-(1-(ferrocene-2-yl)ethyl)-1H-indazole-3-carboxylate (57)**

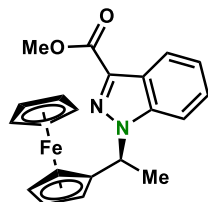

**TLC**:  $R_f$  = 0.31 (petroleum ether/Ethyl acetate = 8/1); 63 mg, yield: 81%; yellow oil.

**$^1H$  NMR** (400 MHz,  $CDCl_3$ )  $\delta$  8.19 (d,  $J$  = 7.3 Hz, 1H), 7.35 (d,  $J$  = 8.0 Hz, 1H), 7.30 – 7.21 (m, 2H), 5.97 (q,  $J$  = 7.1 Hz, 1H), 4.38 (s, 1H), 4.21 – 4.17 (m, 2H), 4.13 (s, 6H), 4.03 (s, 3H), 1.96 (d,  $J$  = 7.1 Hz, 3H).

**$^{13}C$  NMR** (101 MHz,  $CDCl_3$ )  $\delta$  163.2, 139.0, 133.8, 126.2, 124.3, 122.9, 122.1, 110.8, 87.4, 68.9, 68.8, 68.4, 67.6, 66.6, 57.4, 51.9, 19.4.

**HRMS** (ESI-TOF)  $m/z$ :  $[M+Na]^+$  Calcd for  $C_{21}H_{20}FeN_2O_2Na$  411.0760; Found: 411.0768.

**Chiral HPLC**: The ee value was 96%,  $t_S$  (major) = 11.6 min,  $t_R$  (minor) = 14.7 min (Chiralpak IF,  $\lambda$  = 254 nm, 10% isopropanol/hexanes, flow rate = 0.8 mL/min).

**ethyl (*S*)-1-(1-(ferrocene-2-yl)ethyl)-1H-pyrazole-4-carboxylate (58)**

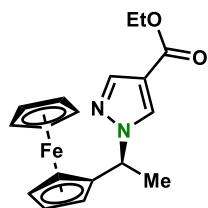

**TLC**:  $R_f$  = 0.53 (petroleum ether/Ethyl acetate = 5/1); 53mg, yield: 76%; yellow solid.

**$^1H$  NMR** (400 MHz,  $CDCl_3$ )  $\delta$  7.87 (s, 1H), 7.73 (s, 1H), 5.35 (q,  $J$  = 7.0 Hz, 1H), 4.27 – 4.20 (m, 4H), 4.18 – 4.15 (m, 7H), 1.83 (d,  $J$  = 7.0 Hz, 3H), 1.30 (t,  $J$  = 7.1 Hz, 3H).

**$^{13}C$  NMR** (101 MHz,  $CDCl_3$ )  $\delta$  163.1, 140.3, 130.3, 114.5, 87.4, 68.9, 68.8, 68.2, 68.0, 66.1, 60.0, 58.0, 21.1, 14.3.

**HRMS** (ESI-TOF)  $m/z$ :  $[M+Na]^+$  Calcd for  $C_{18}H_{20}FeN_2O_2Na$  375.0760; Found: 375.0766;

**Chiral HPLC:** The ee value was 99%,  $t_R$  (minor) = 7.6 min,  $t_S$  (major) = 9.8 min (Chiralpak IA,  $\lambda$  = 254 nm, 15% isopropanol/hexanes, flow rate = 1.0 mL/min).

**diethyl (S)-1-(1-(ferrocene-2-yl)ethyl)-1H-pyrazole-3,5-dicarboxylate (59)**

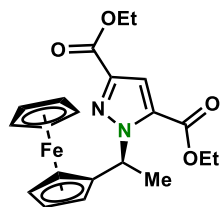

**TLC:**  $R_f$  = 0.43 (petroleum ether/Ethyl acetate = 8/1); 73 mg, yield: 86%; yellow solid.

**$^1\text{H NMR}$**  (400 MHz,  $\text{CDCl}_3$ )  $\delta$  7.30 (s, 1H), 6.49 (q,  $J$  = 7.0 Hz, 1H), 4.41 – 4.33 (m, 4H), 4.25 (s, 2H), 4.11 (s, 7H), 1.92 (d,  $J$  = 7.0 Hz, 3H), 1.42 – 1.34 (m, 6H).

**$^{13}\text{C NMR}$**  (101 MHz,  $\text{CDCl}_3$ )  $\delta$  161.8, 159.5, 141.9, 132.8, 113.9, 89.6, 68.8, 68.0, 67.6, 67.5, 66.8, 61.3, 60.9, 55.7, 20.8, 14.3, 14.2.

**HRMS** (ESI-TOF)  $m/z$ :  $[\text{M}+\text{Na}]^+$  Calcd for  $\text{C}_{21}\text{H}_{24}\text{FeN}_2\text{O}_4\text{Na}$  447.0972; Found: 447.0975.

**Chiral HPLC:** The ee value was 99%,  $t_S$  (major) = 5.5 min,  $t_R$  (minor) = 8.0 min (Chiralpak IF,  $\lambda$  = 254 nm, 15% isopropanol/hexanes, flow rate = 1.0 mL/min).

**methyl (S)-1-(1-(ferrocene-2-yl)ethyl)-1H-1,2,3-triazole-5-carboxylate (60)**

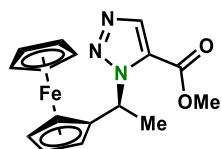

**TLC:**  $R_f$  = 0.31 (petroleum ether/Ethyl acetate = 8/1); 39 mg, yield: 58%; yellow solid.

**$^1\text{H NMR}$**  (400 MHz,  $\text{CDCl}_3$ )  $\delta$  8.04 (s, 1H), 5.75 (q,  $J$  = 7.1 Hz, 1H), 4.31 – 4.29 (m, 1H), 4.27 – 4.26 (m, 1H), 4.18 – 4.17 (m, 1H), 4.15 – 4.14 (m, 1H), 4.09 (s, 5H), 3.94 (s, 3H), 1.93 (d,  $J$  = 7.0 Hz, 3H).

**$^{13}\text{C NMR}$**  (101 MHz,  $\text{CDCl}_3$ )  $\delta$  161.2, 138.7, 136.6, 87.5, 68.8, 68.6, 68.0, 67.5, 66.5, 61.9, 52.3, 20.6.

**HRMS** (ESI-TOF)  $m/z$ :  $[\text{M}+\text{Na}]^+$  Calcd for  $\text{C}_{16}\text{H}_{17}\text{FeN}_3\text{O}_2\text{Na}$  362.0556; Found: 362.0567.

**Chiral HPLC:** The ee value was 96%,  $t_R$  (minor) = 8.4 min,  $t_S$  (major) = 9.3 min (Chiralpak IF,  $\lambda$  = 254 nm, 15% isopropanol/hexanes, flow rate = 1.0 mL/min).

**methyl (S)-2-(1-(ferrocene-2-yl)ethyl)-2H-1,2,3-triazole-4-carboxylate (61)**

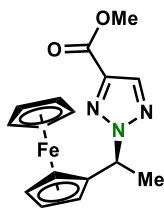

**TLC:**  $R_f = 0.39$  (petroleum ether/Ethyl acetate = 8/1); 38.6 mg, yield: 57%; yellow solid.

**$^1\text{H NMR}$**  (400 MHz,  $\text{CDCl}_3$ )  $\delta$  8.04 (s, 1H), 5.75 (q,  $J = 7.0$  Hz, 1H), 4.30 – 4.26 (m, 2H), 4.18 – 4.14 (m, 2H), 4.10 (s, 5H), 3.94 (s, 3H), 1.94 (d,  $J = 7.0$  Hz, 3H).

**$^{13}\text{C NMR}$**  (101 MHz,  $\text{CDCl}_3$ )  $\delta$  161.3, 138.8, 136.6, 87.6, 68.8, 68.6, 68.0, 67.5, 66.5, 61.9, 52.3, 20.6.

**HRMS** (ESI-TOF)  $m/z$ :  $[\text{M}+\text{Na}]^+$  Calcd for  $\text{C}_{16}\text{H}_{17}\text{FeN}_3\text{O}_2\text{Na}$  362.0556; Found: 362.0565.

**Chiral HPLC:** The ee value was 95%,  $t_R$  (minor) = 8.8 min,  $t_S$  (major) = 10.0 min (Chiralpak IF,  $\lambda = 254$  nm, 15% isopropanol/hexanes, flow rate = 1.0 mL/min).

**(S)-5-phenyl-2-(1-(ferrocene-2-yl)ethyl)-2H-tetrazole (62)**

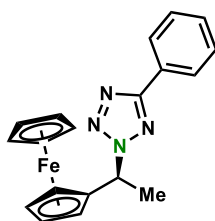

**TLC:**  $R_f = 0.47$  (petroleum ether/Ethyl acetate = 8/1); 51 mg, yield: 71%; yellow solid.

**$^1\text{H NMR}$**  (400 MHz,  $\text{CDCl}_3$ )  $\delta$  8.18 (dd,  $J = 7.8, 1.9$  Hz, 2H), 7.48 (d,  $J = 7.5$  Hz, 3H), 5.95 (q,  $J = 7.0$  Hz, 1H), 4.30 (d,  $J = 7.2$  Hz, 2H), 4.19 – 4.17 (m, 2H), 4.11 (s, 5H), 2.01 (d,  $J = 7.0$  Hz, 3H).

**$^{13}\text{C NMR}$**  (101 MHz,  $\text{CDCl}_3$ )  $\delta$  164.6, 130.3, 129.0, 127.8, 126.9, 87.7, 69.0, 68.7, 68.2, 67.3, 66.8, 60.0, 21.2.

**HRMS** (ESI-TOF)  $m/z$ :  $[\text{M}+\text{H}]^+$  Calcd for  $\text{C}_{19}\text{H}_{19}\text{FeN}_4$  359.0948; Found: 359.0963.

**Chiral HPLC:** The ee value was 91%,  $t_R$  (minor) = 8.8 min,  $t_S$  (major) = 10.2 min (Chiralpak IF,  $\lambda = 254$  nm, 15% isopropanol/hexanes, flow rate = 1.0 mL/min).

**(S)-6-chloro-9-(1-(ferrocene-2-yl)ethyl)-9H-purine (63)**

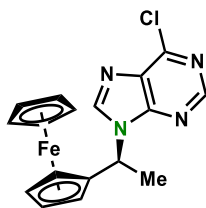

**TLC:**  $R_f = 0.13$  (petroleum ether/Ethyl acetate = 5/1); 51 mg, yield: 70%; yellow oil.

**$^1\text{H NMR}$**  (400 MHz,  $\text{CDCl}_3$ )  $\delta$  8.76 (s, 1H), 7.92 (s, 1H), 5.80 (q,  $J = 7.0$  Hz, 1H), 4.38 (d,  $J = 1.3$  Hz, 1H), 4.27 (d,  $J = 1.3$  Hz, 1H), 4.19 (s, 6H), 4.16 (dd,  $J = 2.4, 1.2$  Hz, 1H), 1.94 (d,  $J = 7.0$  Hz, 3H).

**$^{13}\text{C NMR}$**  (101 MHz,  $\text{CDCl}_3$ )  $\delta$  151.6, 151.1, 150.8, 143.5, 131.6, 86.5, 69.2, 69.0, 68.5, 68.1, 66.0, 51.0, 20.7.

**HRMS** (ESI-TOF)  $m/z$ :  $[\text{M}+\text{Na}]^+$  Calcd for  $\text{C}_{17}\text{H}_{15}\text{ClFeN}_4\text{Na}$  389.0221; Found: 389.0211.

**Chiral HPLC:** The ee value was 98%,  $t_R$  (minor) = 27.0 min,  $t_S$  (major) = 32.1 min (Chiralpaks IE,  $\lambda = 254$  nm, 15% isopropanol/hexanes, flow rate = 1.0 mL/min).

**(S)-3-methyl-1-(1-(ferrocene-2-yl)ethyl)-1H-indole (64)**

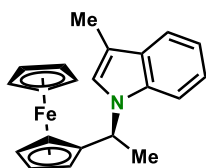

**TLC:**  $R_f = 0.72$  (petroleum ether/Ethyl acetate = 10:1); 41 mg, yield: 60%; yellow solid.

**$^1\text{H NMR}$**  (400 MHz,  $\text{CDCl}_3$ )  $\delta$  7.58 (d,  $J = 7.8$  Hz, 1H), 7.44 (d,  $J = 8.2$  Hz, 1H), 7.26 – 7.22 (m, 1H), 7.15 – 7.11 (m, 1H), 6.81 (s, 1H), 5.53 (q,  $J = 6.9$  Hz, 1H), 4.34 – 4.33 (m, 1H), 4.22 – 4.15 (m, 8H), 2.31 (d,  $J = 1.1$  Hz, 3H), 1.83 (d,  $J = 6.9$  Hz, 3H).

**$^{13}\text{C NMR}$**  (101 MHz,  $\text{CDCl}_3$ )  $\delta$  135.7, 128.6, 122.4, 121.1, 119.0, 118.4, 110.1, 109.1, 89.6, 68.8, 68.4, 68.1, 67.5, 66.4, 50.4, 20.6, 9.7.

**HRMS** (ESI-TOF)  $m/z$ :  $[\text{M}]^+$  Calcd for  $\text{C}_{21}\text{H}_{21}\text{FeN}$  343.1018; Found: 343.1021.

**Chiral HPLC:** The ee value was 95%,  $t_R$  (minor) = 19.0 min,  $t_S$  (major) = 21.1 min (Chiralpak IA,  $\lambda = 254$  nm, 1% isopropanol/hexanes, flow rate = 0.2 mL/min).

**(S)-5-fluoro-3-methyl-1-(1-(ferrocene-2-yl)ethyl)-1H-indole (65)**

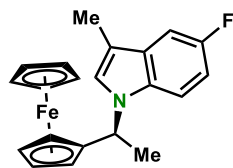

**TLC:**  $R_f = 0.65$  (petroleum ether/Ethyl acetate = 10/1); 45 mg, yield: 62%; yellow oil.

**$^1\text{H NMR}$**  (400 MHz,  $\text{CDCl}_3$ )  $\delta$  7.29 (dd,  $J = 8.9, 4.3$  Hz, 1H), 7.17 (dd,  $J = 9.6, 2.5$  Hz, 1H), 6.97 – 6.92 (m, 1H), 6.82 (d,  $J = 1.2$  Hz, 1H), 5.47 – 5.42 (m, 1H), 4.32 – 4.11 (m, 9H), 2.22 (d,  $J = 1.0$  Hz, 3H), 1.80 (d,  $J = 6.9$  Hz, 3H).

**$^{13}\text{C NMR}$**  (101 MHz,  $\text{CDCl}_3$ )  $\delta$  158.5, 156.2, 132.3, 128.8, 124.2, 110.1, 110.1, 109.8, 109.7, 109.5, 109.2, 103.9, 103.7, 89.5, 68.9, 68.5, 68.0, 67.6, 66.4, 50.8, 20.6, 9.6.

**$^{19}\text{F NMR}$**  (376 MHz,  $\text{CDCl}_3$ )  $\delta$  -125.80.

**HRMS** (ESI-TOF)  $m/z$ :  $[\text{M}+\text{Na}]^+$  Calcd for  $\text{C}_{21}\text{H}_{20}\text{FFeNNa}$  384.0816; Found: 384.0818.

**Chiral HPLC:** The ee value was 97%,  $t_R$  (minor) = 12.9 min,  $t_S$  (major) = 14.7 min (Chiralpak IA,  $\lambda = 254$  nm, 2% isopropanol/hexanes, flow rate = 0.4 mL/min).

**(S)-5-chloro-3-methyl-1-(1-(ferrocene-2-yl)ethyl)-1H-indole (66)**

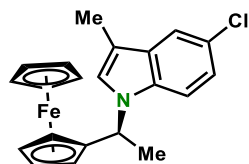

**TLC:**  $R_f = 0.64$  (petroleum ether/Ethyl acetate = 10/1); 44 mg, yield: 58%; yellow solid.

**$^1\text{H NMR}$**  (400 MHz,  $\text{CDCl}_3$ )  $\delta$  7.50 (d,  $J = 2.0$  Hz, 1H), 7.30 (d,  $J = 8.7$  Hz, 1H), 7.15 (dd,  $J = 8.7, 2.1$  Hz, 1H), 6.81 (d,  $J = 1.2$  Hz, 1H), 5.47–5.42 (q,  $J = 6.9$  Hz, 1H), 4.33 – 4.08 (m, 9H), 2.23 (d,  $J = 1.1$  Hz, 3H), 1.80 (d,  $J = 6.9$  Hz, 3H).

**$^{13}\text{C NMR}$**  (101 MHz,  $\text{CDCl}_3$ )  $\delta$  134.1, 129.7, 124.2, 123.9, 121.3, 118.5, 110.2, 109.9, 89.4, 68.9, 68.6, 68.0, 67.7, 66.4, 50.8, 20.6, 9.6.

**HRMS** (ESI-TOF)  $m/z$ :  $[\text{M}+\text{K}]^+$  Calcd for  $\text{C}_{21}\text{H}_{20}\text{ClFeNK}$  416.0259; Found: 416.0225.

**Chiral HPLC:** The ee value was 92%,  $t_R$  (minor) = 10.3 min,  $t_S$  (major) = 11.1 min (Chiralpak IA,  $\lambda = 254$  nm, 2% isopropanol/hexanes, flow rate = 0.4 mL/min).

**methyl (S)-4-(1-(1-(ferrocene-2-yl)ethyl)-1H-indol-3-yl)butanoate (67)**

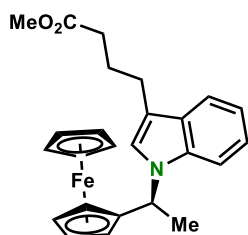

**TLC:**  $R_f = 0.31$  (petroleum ether/Ethyl acetate = 10/1); 49 mg, yield: 57%; yellow oil.

**$^1\text{H NMR}$**  (400 MHz,  $\text{CDCl}_3$ )  $\delta$  7.57 (d,  $J = 7.9$  Hz, 1H), 7.41 (d,  $J = 8.2$  Hz, 1H), 7.23 – 7.19 (m, 1H), 7.11 – 7.07 (m, 1H), 6.80 (s, 1H), 5.50 (q,  $J = 6.9$  Hz, 1H), 4.31 – 4.27 (m, 1H), 4.22 – 4.10 (m, 8H), 3.65 (s, 3H), 2.76 – 2.72 (m, 2H), 2.35 (t,  $J = 7.5$  Hz, 2H), 2.01 – 1.97 (m, 2H), 1.81 (d,  $J = 7.0$  Hz, 3H).

**$^{13}\text{C NMR}$**  (101 MHz,  $\text{CDCl}_3$ )  $\delta$  174.2, 135.9, 127.8, 122.3, 121.2, 119.1, 118.6, 114.1, 109.4, 89.6, 68.8, 68.4, 68.0, 67.5, 66.4, 51.4, 50.5, 33.7, 25.4, 24.6, 20.7.

**HRMS** (ESI-TOF)  $m/z$ :  $[\text{M}+\text{Na}]^+$  Calcd for  $\text{C}_{25}\text{H}_{27}\text{FeNO}_2\text{Na}$  452.1278; Found: 452.1277.

**Chiral HPLC:** The ee value was 93%,  $t_R$  (minor) = 4.9 min,  $t_S$  (major) = 5.5 min (Chiralpak IA,  $\lambda = 254$  nm, 15% isopropanol/hexanes, flow rate = 1.0 mL/min).

**(S)-2-(1-(1-(ferrocene-2-yl)ethyl)-1H-indol-3-yl)ethan-1-ol (68)**

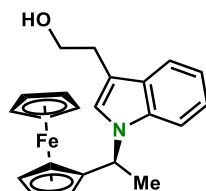

**TLC:**  $R_f = 0.35$  (petroleum ether/Ethyl acetate= 3/1); 49 mg, yield: 66%; yellow solid.

**$^1\text{H NMR}$**  (400 MHz,  $\text{CDCl}_3$ )  $\delta$  7.59 (d,  $J = 7.9$  Hz, 1H), 7.43 (d,  $J = 7.9$  Hz, 1H), 7.25 – 7.21 (m, 1H), 7.13 – 7.09 (m, 1H), 6.88 (s, 1H), 5.51 (q,  $J = 6.9$  Hz, 1H), 4.30 (d,  $J = 1.3$  Hz, 1H), 4.21 – 4.17 (m, 6H), 4.15 – 4.11 (m, 2H), 3.83 (t,  $J = 6.3$  Hz, 2H), 2.98 – 2.94 (m, 2H), 1.82 (d,  $J = 7.0$  Hz, 3H).

**$^{13}\text{C NMR}$**  (101 MHz,  $\text{CDCl}_3$ )  $\delta$  136.0, 127.8, 123.3, 121.4, 119.0, 118.9, 110.6, 109.5, 89.4, 68.8, 68.5, 68.0, 67.6, 66.4, 62.6, 50.6, 28.8, 20.6.

**HRMS** (ESI-TOF)  $m/z$ :  $[\text{M}+\text{H}]^+$  Calcd for  $\text{C}_{22}\text{H}_{24}\text{FeNO}$  374.1196; Found: 374.1216.

**Chiral HPLC:** The ee value was 97%,  $t_R$  (minor) = 12.2 min,  $t_S$  (major) = 13.4 min (Chiralpak IC,  $\lambda = 254$  nm, 10% isopropanol/hexanes, flow rate = 1.0 mL/min).

**methyl (R)-2-(2-(((benzyloxy)carbonyl)amino)acetamido)-2-(1-((S)-1-(ferrocene-2-yl)ethyl)-1H-indol-3-yl)acetate (69)**

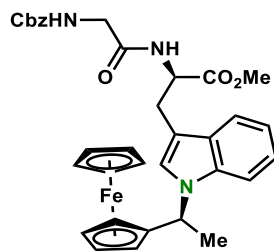

**TLC:**  $R_f = 0.62$  (petroleum ether/Ethyl acetate = 1/1); 89 mg, yield: 68%; yellow solid.

**$^1\text{H NMR}$**  (400 MHz,  $\text{CDCl}_3$ )  $\delta$  7.44 (dd,  $J = 17.5, 8.1$  Hz, 2H), 7.38-4.30 (m, 5H), 7.23 – 7.19 (m, 1H), 7.09 (t,  $J = 7.5$  Hz, 1H), 6.72 (s, 1H), 6.34 – 6.28 (m, 1H), 5.49 (dd,  $J = 6.9$  Hz, 1H), 5.29 – 5.26 (m, 1H), 5.09 (s, 2H), 4.85 (dd,  $J = 7.9, 4.5$  Hz, 1H), 4.33 (d,  $J = 4.2$  Hz, 1H), 4.17 (dd, 9H), 3.80 – 3.75 (m, 2H), 3.59 (d,  $J = 27.8$  Hz, 3H), 3.24 (d,  $J = 5.8$  Hz, 2H), 1.79 (d,  $J = 6.8$  Hz, 3H).

**$^{13}\text{C NMR}$**  (101 MHz,  $\text{CDCl}_3$ )  $\delta$  171.8, 168.3, 135.6, 128.5, 128.2, 128.0, 123.7, 121.5, 119.3, 118.5, 109.5, 108.2, 89.1, 68.9, 68.8, 68.6, 68.1, 67.7, 67.1, 66.4, 60.4, 53.3, 52.3, 50.7, 44.3, 27.5, 20.6, 14.2.

**HRMS** (ESI-TOF)  $m/z$ :  $[\text{M}+\text{Na}]^+$  Calcd for  $\text{C}_{34}\text{H}_{35}\text{FeN}_3\text{O}_5\text{Na}$  644.1813; Found: 644.1809.

**Chiral HPLC:** The ee value was 98%,  $t_R$  (minor) = 13.9 min,  $t_S$  (major) = 15.0 min (Chiralpak IA,  $\lambda = 254$  nm, 20% isopropanol/hexanes, flow rate = 1.0 mL/min).

**(S)-N-(1-(ferrocene-2-yl)ethyl)benzamide (70)**

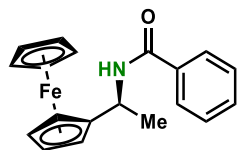

**TLC:**  $R_f = 0.17$  (petroleum ether/Ethyl acetate = 8/1); 40 mg, yield: 60%; yellow solid.

**$^1\text{H NMR}$**  (400 MHz,  $\text{CDCl}_3$ )  $\delta$  7.79 (d,  $J = 7.0$  Hz, 2H), 7.52 – 7.42 (m, 3H), 6.41 (d,  $J = 8.2$  Hz, 1H), 5.11 – 5.04 (m, 1H), 4.27 – 4.16 (m, 9H), 1.56 (d,  $J = 6.7$  Hz, 3H).

**$^{13}\text{C NMR}$**  (101 MHz,  $\text{CDCl}_3$ )  $\delta$  166.1, 134.7, 131.4, 128.6, 126.8, 91.3, 68.5, 68.1, 67.8, 67.5, 65.8, 44.1, 20.7.

**HRMS** (ESI-TOF)  $m/z$ :  $[\text{M}]^+$  Calcd for  $\text{C}_{19}\text{H}_{19}\text{FeNO}$  333.0810; Found: 333.0823.

**Chiral HPLC:** The ee value was 90%,  $t_R$  (minor) = 17.4 min,  $t_S$  (major) = 21.7 min (Chiralpak IA,  $\lambda$  = 254 nm, 10% isopropanol/hexanes, flow rate = 1.0 mL/min).

**(S)-N-(1-(ferrocene-2-yl)ethyl)cyclopropanecarboxamide (71)**

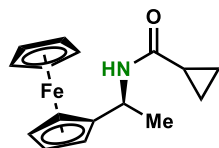

**TLC:**  $R_f$  = 0.19 (petroleum ether/Ethyl acetate = 8/1); 25 mg, yield: 42%; yellow solid.

**$^1\text{H}$  NMR** (400 MHz,  $\text{CDCl}_3$ )  $\delta$  5.84 (d,  $J$  = 8.5 Hz, 1H), 4.94 – 4.87 (m, 1H), 4.21 – 4.20 (m, 1H), 4.18 – 4.12 (m, 8H), 1.45 (d,  $J$  = 6.7 Hz, 3H), 1.33 – 1.25 (m, 1H), 1.00 – 0.97 (m, 2H), 0.76 – 0.71 (m, 2H).

**$^{13}\text{C}$  NMR** (101 MHz,  $\text{CDCl}_3$ )  $\delta$  172.1, 91.5, 68.5, 68.0, 67.6, 67.4, 65.8, 43.8, 20.8, 14.9, 7.1.

**HRMS** (ESI-TOF)  $m/z$ :  $[\text{M}+\text{Na}]^+$  Calcd for  $\text{C}_{16}\text{H}_{20}\text{FeNONa}$  320.0702; Found: 320.0714.

**Chiral HPLC:** The ee value was 98%,  $t_R$  (minor) = 10.3 min,  $t_S$  (major) = 14.0 min (Chiralpak IA,  $\lambda$  = 254 nm, 10% isopropanol/hexanes, flow rate = 1.0 mL/min).

**benzyl N<sup>2</sup>-(tert-butoxycarbonyl)-N<sup>4</sup>-((S)-1-(ferrocene-2-yl)ethyl)-D-asparaginate (72)**

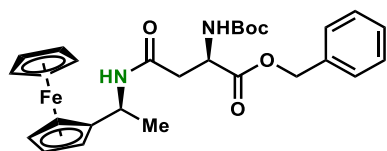

**TLC:**  $R_f$  = 0.22 (petroleum ether/Ethyl acetate = 2/1); 63 mg, yield: 59%; yellow solid.

**$^1\text{H}$  NMR** (400 MHz,  $\text{CDCl}_3$ )  $\delta$  7.39 – 7.30 (m, 5H), 5.91 – 5.74 (m, 2H), 5.24 – 5.12 (m, 2H), 4.83 (t,  $J$  = 7.3 Hz, 1H), 4.52 (dd,  $J$  = 8.7, 4.4 Hz, 1H), 4.14 (d,  $J$  = 12.4 Hz, 9H), 2.86 (dd,  $J$  = 15.5, 4.8 Hz, 1H), 2.67 (dd,  $J$  = 15.6, 4.5 Hz, 1H), 1.40 (d,  $J$  = 10.3 Hz, 12H).

**$^{13}\text{C}$  NMR** (101 MHz,  $\text{CDCl}_3$ )  $\delta$  171.3, 171.3, 168.4, 155.7, 135.4, 135.3, 128.5, 128.2, 128.2, 128.1, 128.1, 90.8, 90.7, 79.9, 77.2, 68.5, 68.5, 68.1, 67.6, 67.3, 67.3, 67.3, 65.6, 65.6, 50.6, 50.6, 43.8, 37.9, 28.2, 20.5, 20.5.

**HRMS** (ESI-TOF)  $m/z$ :  $[M+Na]^+$  Calcd for  $C_{28}H_{34}FeN_2O_5Na$  557.1703; Found: 557.1703.

**Chiral HPLC**: The ee value was 90%,  $t_R$  (minor) = 9.4 min,  $t_S$  (major) = 11.4 min (Chiralpak IA,  $\lambda$  = 254 nm, 20% isopropanol/hexanes, flow rate = 1.0 mL/min).

**(S)-N-phenyl-2-(1-(ferrocene-2-yl)ethyl)aniline (73)**

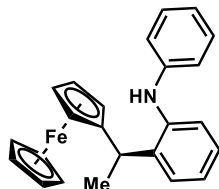

**TLC**:  $R_f$  = 0.43 (petroleum ether/Ethyl acetate = 8/1); 34 mg, yield: 45%; yellow oil.

**$^1H$  NMR** (400 MHz,  $CDCl_3$ )  $\delta$  7.26 – 7.23 (m, 2H), 7.08 – 7.06 (m, 2H), 7.04 – 6.98 (m, 4H), 6.91 – 6.88 (m, 1H), 5.61 (s, 1H), 4.21 – 4.19 (m, 1H), 4.16 – 4.11 (m, 6H), 4.10 – 4.08 (m, 1H), 4.02 – 4.02 (m, 1H), 3.82 (q,  $J$  = 7.2 Hz, 1H), 1.59 (d,  $J$  = 7.2 Hz, 3H).

**$^{13}C$  NMR** (101 MHz,  $CDCl_3$ )  $\delta$  143.6, 140.8, 140.6, 129.2, 127.9, 120.4, 118.2, 117.1, 94.7, 68.5, 67.8, 67.5, 66.7, 66.3, 39.0, 22.6.

**HRMS** (ESI-TOF)  $m/z$ :  $[M]^+$   $C_{24}H_{23}FeN$  Calcd for 381.1174; Found: 381.1179.

**Chiral HPLC**: The ee value was 98%,  $t_R$  (minor) = 10.2 min,  $t_S$  (major) = 12.4 min (Chiralpak IA,  $\lambda$  = 254 nm, 10% isopropanol/hexanes, flow rate = 1.0 mL/min).

**(S)-diphenyl(1-(ferrocene-2-yl)ethyl)phosphine oxide (74)**

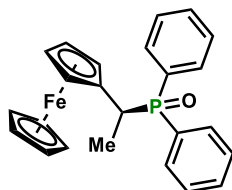

**TLC**:  $R_f$  = 0.17 (petroleum ether/Ethyl acetate = 1/1); 65 mg, yield: 78%; yellow solid.

**$^1H$  NMR** (400 MHz,  $CDCl_3$ )  $\delta$  7.86 – 7.74 (m, 2H), 7.54 – 7.42 (m, 6H), 7.36 – 7.31 (m, 2H), 4.11 (s, 7H), 3.93 (d,  $J$  = 2.6 Hz, 1H), 3.50 – 3.49 (m, 1H), 3.42 – 3.33 (m, 1H), 1.58 (dd,  $J$  = 15.9, 7.3 Hz, 3H).

**$^{13}C$  NMR** (101 MHz,  $CDCl_3$ )  $\delta$  132.5, 132.0, 131.9, 131.6, 131.6, 131.5, 131.4, 131.3, 130.1, 128.5, 128.4, 127.9, 127.8, 85.7, 69.4, 69.4, 68.5, 67.7, 67.5, 67.3, 36.0, 35.4, 13.9, 13.9.

**$^{31}P$  NMR** (160 MHz,  $CDCl_3$ )  $\delta$  34.1

**HRMS** (ESI-TOF)  $m/z$ :  $[M+Na]^+$  Calcd for  $C_{24}H_{23}FeOPNa$  437.0722; Found: 437.0733.

**Chiral HPLC**: The ee value was 92%,  $t_S$  (major) = 11.3 min,  $t_R$  (minor) = 13.6 min (Chiralpak IA,  $\lambda$  = 254 nm, 20% isopropanol/hexanes, flow rate = 1.0 mL/min).

**(S)-bis(4-fluorophenyl)(1-(ferrocene-2-yl)ethyl)phosphine oxide (75)**

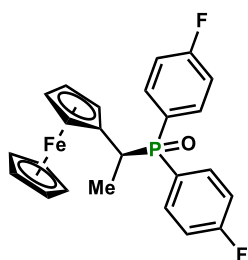

**TLC**:  $R_f$  = 0.18 (petroleum ether/Ethyl acetate = 1/1); 65 mg, yield: 72%; yellow solid.

**$^1H$  NMR** (400 MHz,  $CDCl_3$ )  $\delta$  7.76 – 7.69 (m, 2H), 7.49 – 7.43 (m, 2H), 7.18 – 7.13 (m, 2H), 7.06 – 7.01 (m, 2H), 4.13 (d,  $J$  = 8.2 Hz, 7H), 3.98 (s, 1H), 3.52 (s, 1H), 3.34 – 3.26 (m, 1H), 1.53 (dd,  $J$  = 16.1, 7.2 Hz, 3H).

**$^{13}C$  NMR** (101 MHz,  $CDCl_3$ )  $\delta$  166.2, 163.6, 134.5, 134.4, 134.4, 134.3, 133.9, 133.8, 133.7, 116.1, 115.9, 115.9, 115.7, 115.5, 115.4, 115.3, 115.2, 85.5, 69.5, 68.8, 67.9, 67.6, 67.6, 53.4, 36.3, 35.6, 13.8, 13.8.

**$^{19}F$  NMR** (376 MHz,  $CDCl_3$ )  $\delta$  -106.7, -107.0.

**$^{31}P$  NMR** (160 MHz,  $CDCl_3$ )  $\delta$  33.1.

**HRMS** (ESI-TOF)  $m/z$ :  $[M+Na]^+$  Calcd for  $C_{24}H_{21}F_2FeOPNa$  473.0534; Found: 473.0542.

**Chiral HPLC**: The ee value was 95%,  $t_S$  (major) = 9.7 min,  $t_R$  (minor) = 12.4 min (Chiralpak IA,  $\lambda$  = 254 nm, 20% isopropanol/hexanes, flow rate = 1.0 mL/min).

**(S)-di(naphthalen-2-yl)(1-(ferrocene-2-yl)ethyl)phosphine oxide (76)**

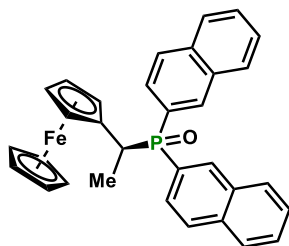

**TLC**:  $R_f$  = 0.15 (petroleum ether/Ethyl acetate = 1/1); 50 mg, yield: 49%; yellow solid.

**<sup>1</sup>H NMR** (400 MHz, CDCl<sub>3</sub>) δ 8.39 (d, *J* = 12.8 Hz, 1H), 8.23 (d, *J* = 12.8 Hz, 1H), 7.95 – 7.87 (m, 3H), 7.84 – 7.78 (m, 4H), 7.60 – 7.46 (m, 5H), 4.20 – 4.08 (m, 7H), 3.87 (s, 1H), 3.63 – 3.58 (m, 1H), 3.53 (s, 1H), 1.68 (dd, *J* = 15.9, 7.3 Hz, 3H).

**<sup>13</sup>C NMR** (101 MHz, CDCl<sub>3</sub>) δ 134.5, 134.2, 133.5, 128.9, 128.2, 128.0, 127.9, 127.7, 127.6, 127.5, 127.4, 126.8, 126.6, 126.3, 85.6, 69.4, 68.5, 67.7, 67.6, 67.4, 36.0, 35.3, 14.0.

**<sup>31</sup>P NMR** (160 MHz, CDCl<sub>3</sub>) δ 34.48.

**HRMS** (ESI-TOF) *m/z*: [M+Na]<sup>+</sup> Calcd for C<sub>32</sub>H<sub>27</sub>FeOPNa 537.1035; Found: 537.1042.

**Chiral HPLC**: The ee value was 90%, *t<sub>R</sub>* (minor) = 9.2 min, *t<sub>S</sub>* (major) = 11.5 min (Chiralpak OD-H, λ = 254 nm, 20% isopropanol/hexanes, flow rate = 1.0 mL/min).

## 8. Summary of Chiral HPLC analysis Spectra

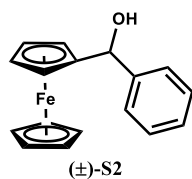

<色谱图>

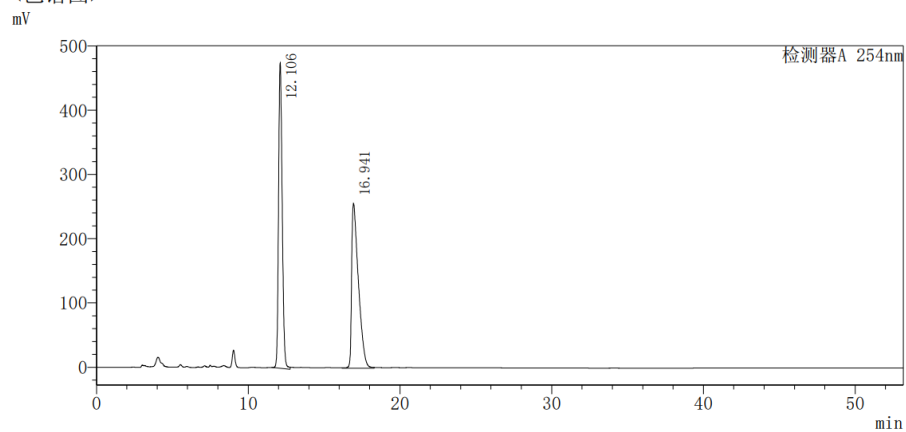

<峰表>

| 检测器A 254nm |        |          |        |        |      |    |      |
|------------|--------|----------|--------|--------|------|----|------|
| 峰号         | 保留时间   | 面积       | 高度     | 浓度     | 浓度单位 | 标记 | 化合物名 |
| 1          | 12.106 | 7957124  | 475023 | 49.840 |      | M  |      |
| 2          | 16.941 | 8008130  | 256641 | 50.160 |      | M  |      |
| 总计         |        | 15965254 | 731664 |        |      |    |      |

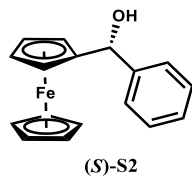

<色谱图>

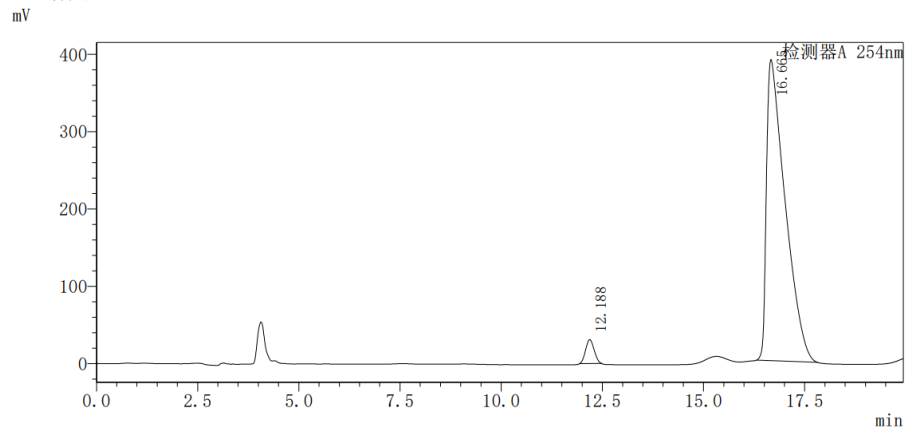

<峰表>

| 检测器A 254nm |        |          |        |        |      |    |      |
|------------|--------|----------|--------|--------|------|----|------|
| 峰号         | 保留时间   | 面积       | 高度     | 浓度     | 浓度单位 | 标记 | 化合物名 |
| 1          | 12.188 | 457517   | 31125  | 3.532  |      | M  |      |
| 2          | 16.665 | 12497019 | 389436 | 96.468 |      | M  |      |
| 总计         |        | 12954536 | 420561 |        |      |    |      |

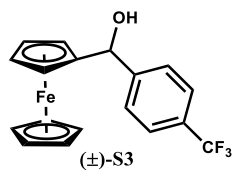

<色谱图>

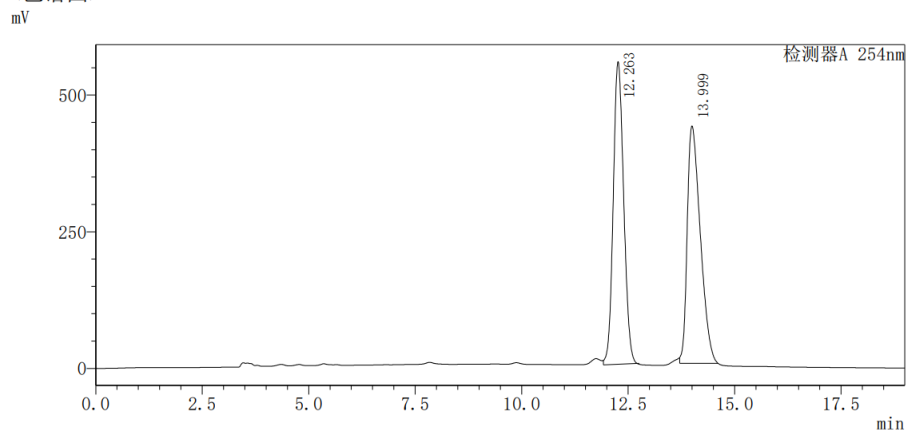

<峰表>

检测器A 254nm

| 峰号 | 保留时间   | 面积       | 高度     | 浓度     | 浓度单位 | 标记 | 化合物名 |
|----|--------|----------|--------|--------|------|----|------|
| 1  | 12.263 | 9422026  | 553294 | 50.398 |      | M  |      |
| 2  | 13.999 | 9273099  | 434150 | 49.602 |      | M  |      |
| 总计 |        | 18695125 | 987444 |        |      |    |      |

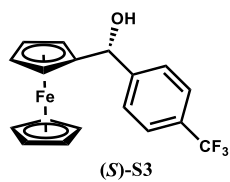

<色谱图>

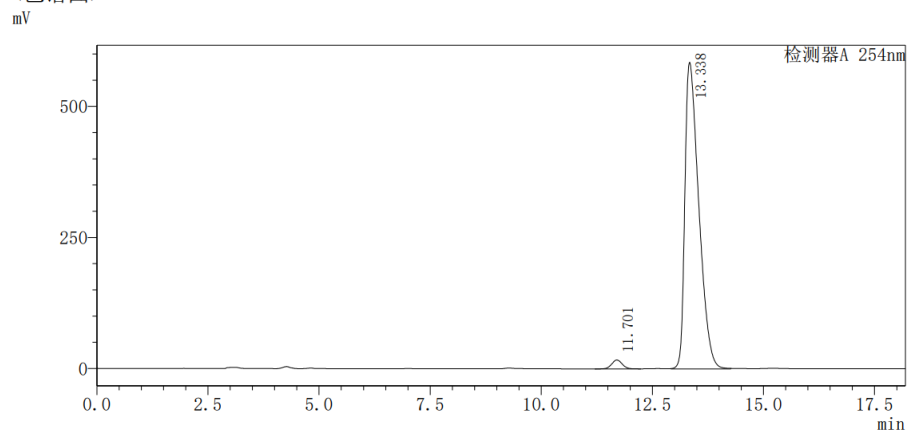

<峰表>

检测器A 254nm

| 峰号 | 保留时间   | 面积       | 高度     | 浓度     | 浓度单位 | 标记 | 化合物名 |
|----|--------|----------|--------|--------|------|----|------|
| 1  | 11.701 | 279762   | 16948  | 2.146  |      |    |      |
| 2  | 13.338 | 12758677 | 584860 | 97.854 |      | M  |      |
| 总计 |        | 13038439 | 601808 |        |      |    |      |

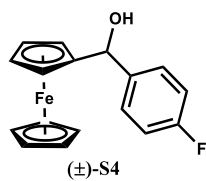

<色谱图>

mV

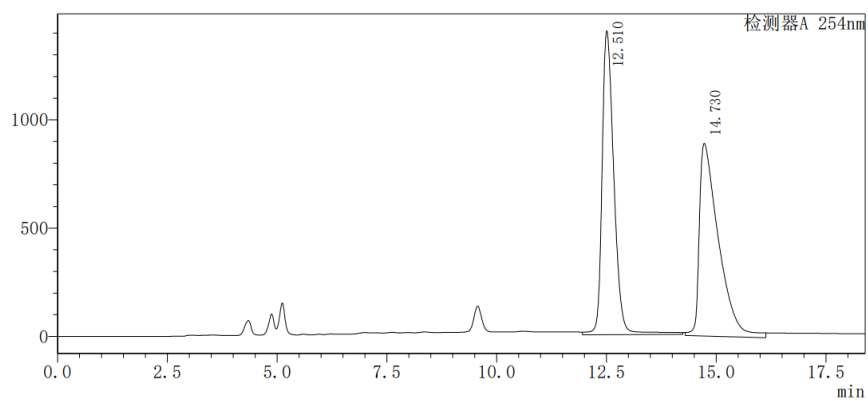

<峰表>

检测器A 254nm

| 峰号 | 保留时间   | 面积       | 高度      | 浓度     | 浓度单位 | 标记 | 化合物名 |
|----|--------|----------|---------|--------|------|----|------|
| 1  | 12.510 | 26537569 | 1402694 | 49.481 |      |    |      |
| 2  | 14.730 | 27093817 | 889128  | 50.519 |      | M  |      |
| 总计 |        | 53631386 | 2291821 |        |      |    |      |

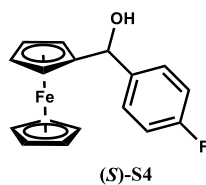

<色谱图>

mV

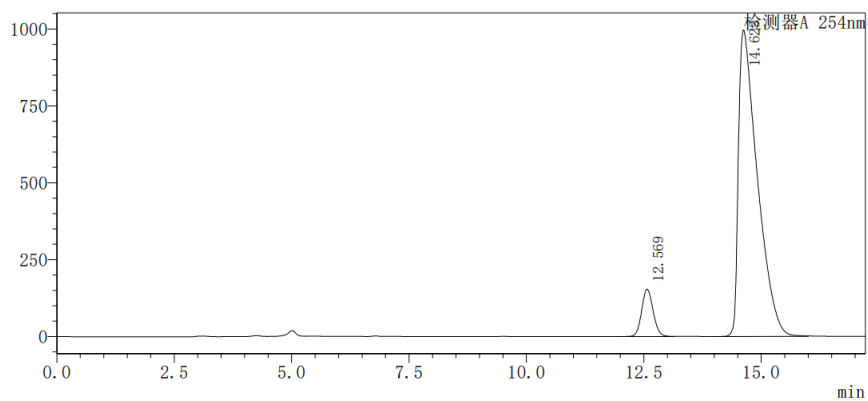

<峰表>

检测器A 254nm

| 峰号 | 保留时间   | 面积       | 高度      | 浓度     | 浓度单位 | 标记 | 化合物名 |
|----|--------|----------|---------|--------|------|----|------|
| 1  | 12.569 | 2609919  | 153833  | 8.539  |      | M  |      |
| 2  | 14.623 | 27954417 | 996294  | 91.461 |      | M  |      |
| 总计 |        | 30564336 | 1150127 |        |      |    |      |

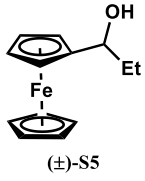

<色谱图>  
mV

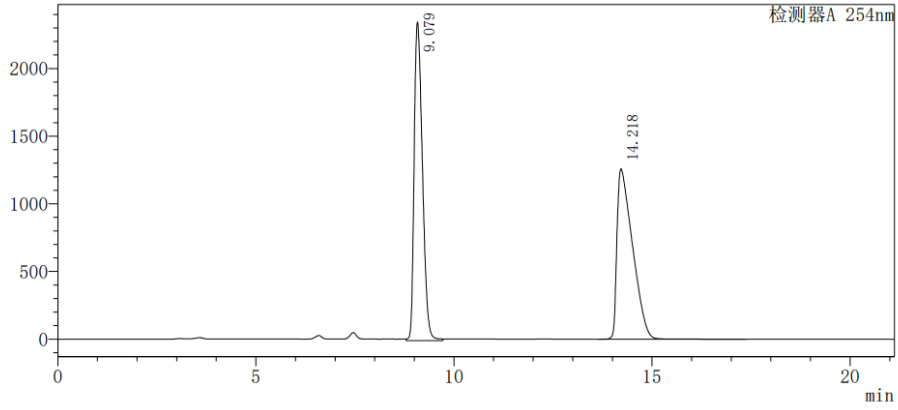

<峰表>

检测器A 254nm

| 峰号 | 保留时间   | 面积       | 高度      | 浓度     | 浓度单位 | 标记 | 化合物名 |
|----|--------|----------|---------|--------|------|----|------|
| 1  | 9.079  | 34231642 | 2352351 | 49.936 |      | M  |      |
| 2  | 14.218 | 34319946 | 1259027 | 50.064 |      |    |      |
| 总计 |        | 68551589 | 3611378 |        |      |    |      |

[图]

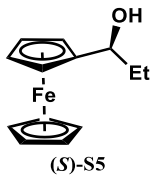

<色谱图>  
mV

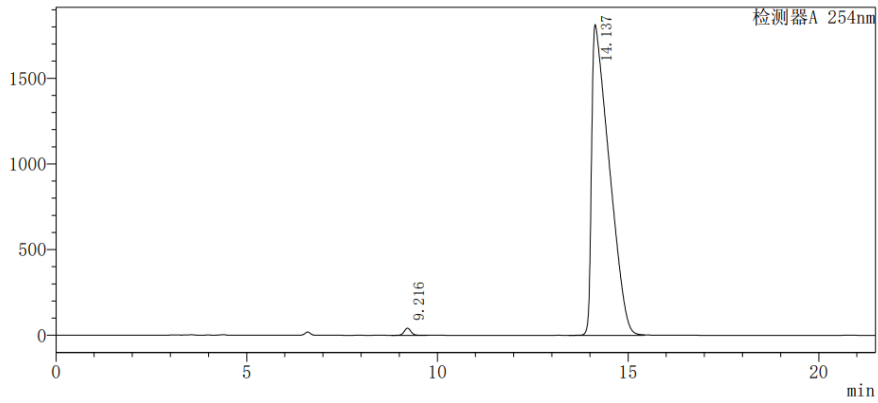

<峰表>

检测器A 254nm

| 峰号 | 保留时间   | 面积       | 高度      | 浓度     | 浓度单位 | 标记 | 化合物名 |
|----|--------|----------|---------|--------|------|----|------|
| 1  | 9.216  | 524261   | 41973   | 0.891  |      |    |      |
| 2  | 14.137 | 58283531 | 1813307 | 99.109 |      | M  |      |
| 总计 |        | 58807793 | 1855279 |        |      |    |      |

[图]

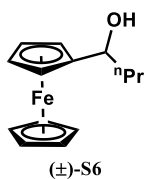

<色谱图>

mV

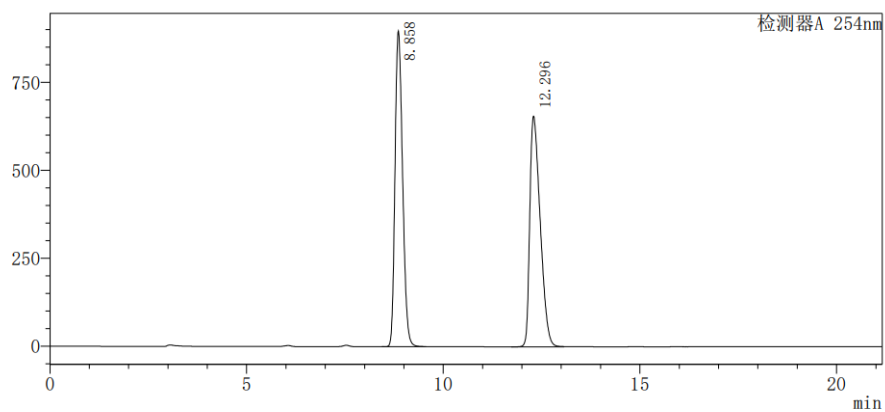

<峰表>

检测器A 254nm

| 峰号 | 保留时间   | 面积       | 高度      | 浓度     | 浓度单位 | 标记 | 化合物名 |
|----|--------|----------|---------|--------|------|----|------|
| 1  | 8.858  | 12054194 | 897063  | 49.965 |      | M  |      |
| 2  | 12.296 | 12071239 | 655326  | 50.035 |      | M  |      |
| 总计 |        | 24125433 | 1552389 |        |      |    |      |

[画]

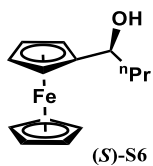

<色谱图>

mV

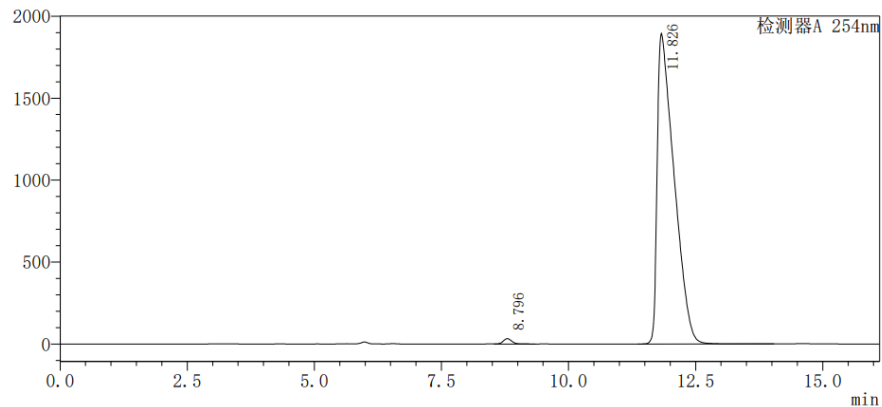

<峰表>

检测器A 254nm

| 峰号 | 保留时间   | 面积       | 高度      | 浓度     | 浓度单位 | 标记 | 化合物名 |
|----|--------|----------|---------|--------|------|----|------|
| 1  | 8.796  | 389486   | 32633   | 0.883  |      |    |      |
| 2  | 11.826 | 43695823 | 1895023 | 99.117 |      |    |      |
| 总计 |        | 44085309 | 1927656 |        |      |    |      |

[画]

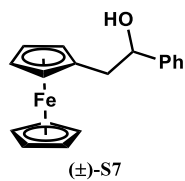

<色谱图>

mV

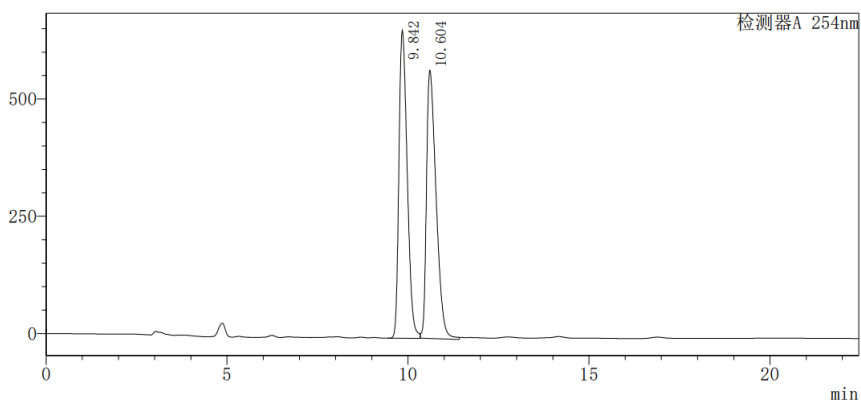

<峰表>

检测器A 254nm

| 峰号 | 保留时间   | 面积       | 高度      | 浓度     | 浓度单位 | 标记 | 化合物名 |
|----|--------|----------|---------|--------|------|----|------|
| 1  | 9.842  | 10436609 | 656400  | 49.638 |      |    |      |
| 2  | 10.604 | 10588914 | 571590  | 50.362 |      | M  |      |
| 总计 |        | 21025523 | 1227990 |        |      |    |      |

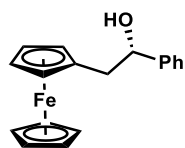

<色谱图>

mV

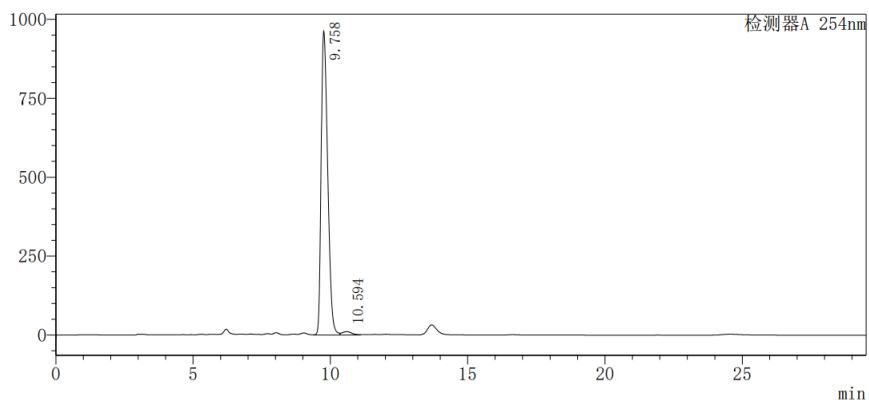

<峰表>

检测器A 254nm

| 峰号 | 保留时间   | 面积       | 高度     | 浓度     | 浓度单位 | 标记 | 化合物名 |
|----|--------|----------|--------|--------|------|----|------|
| 1  | 9.758  | 15968605 | 962150 | 98.311 |      |    |      |
| 2  | 10.594 | 274367   | 10746  | 1.689  |      | V  |      |
| 总计 |        | 16242972 | 972896 |        |      |    |      |

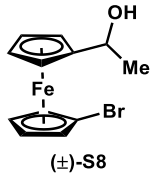

<色谱图>  
mV

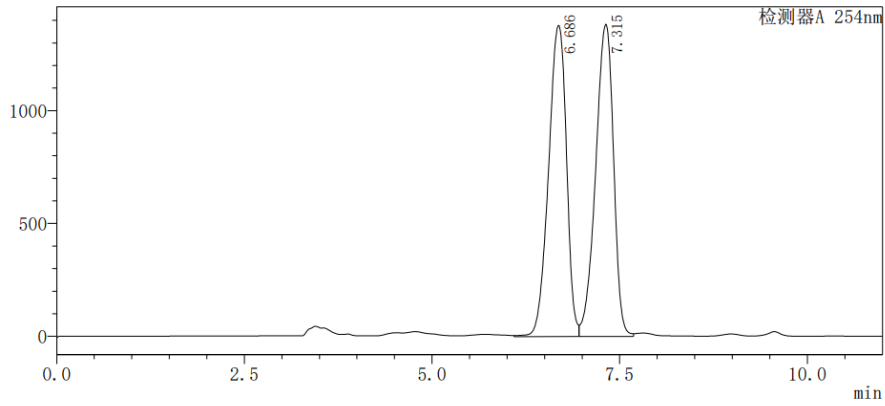

<峰表>

检测器A 254nm

| 峰号 | 保留时间  | 面积       | 高度      | 浓度     | 浓度单位 | 标记 | 化合物名 |
|----|-------|----------|---------|--------|------|----|------|
| 1  | 6.686 | 22932313 | 1378988 | 49.960 |      |    |      |
| 2  | 7.315 | 22968808 | 1383721 | 50.040 |      | V  |      |
| 总计 |       | 45901121 | 2762710 |        |      |    |      |

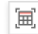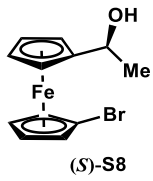

<色谱图>  
mV

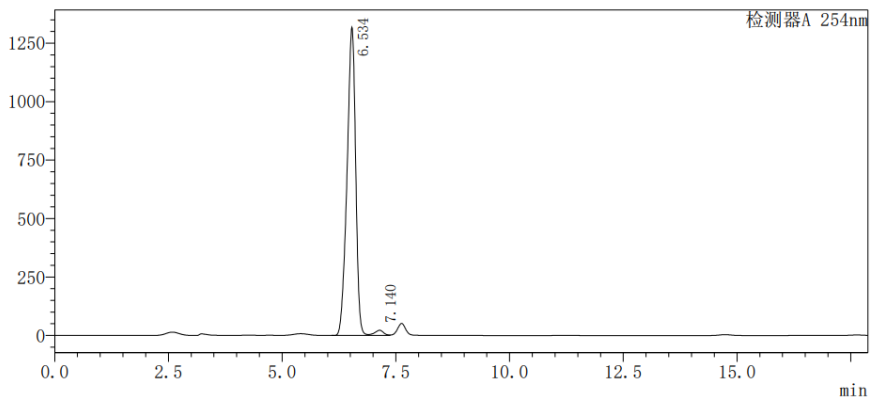

<峰表>

检测器A 254nm

| 峰号 | 保留时间  | 面积       | 高度      | 浓度     | 浓度单位 | 标记 | 化合物名 |
|----|-------|----------|---------|--------|------|----|------|
| 1  | 6.534 | 17375054 | 1318710 | 98.207 |      |    |      |
| 2  | 7.140 | 317169   | 22410   | 1.793  |      | V  |      |
| 总计 |       | 17692223 | 1341120 |        |      |    |      |

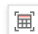

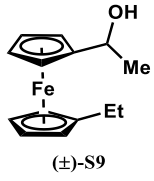

<色谱图>  
mV

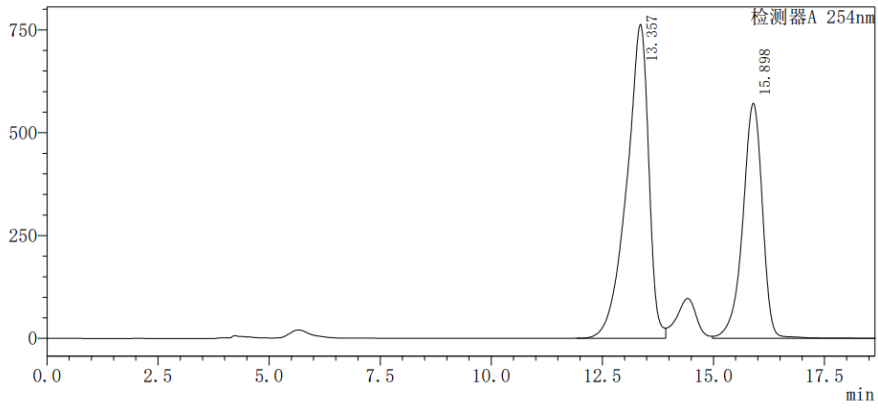

<峰表>

检测器A 254nm

| 峰号 | 保留时间   | 面积       | 高度      | 浓度     | 浓度单位 | 标记 | 化合物名 |
|----|--------|----------|---------|--------|------|----|------|
| 1  | 13.357 | 26204858 | 762982  | 59.848 |      |    |      |
| 2  | 15.898 | 17580899 | 571348  | 40.152 |      |    |      |
| 总计 |        | 43785757 | 1334330 |        |      |    |      |

画

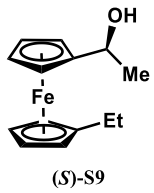

<色谱图>  
mV

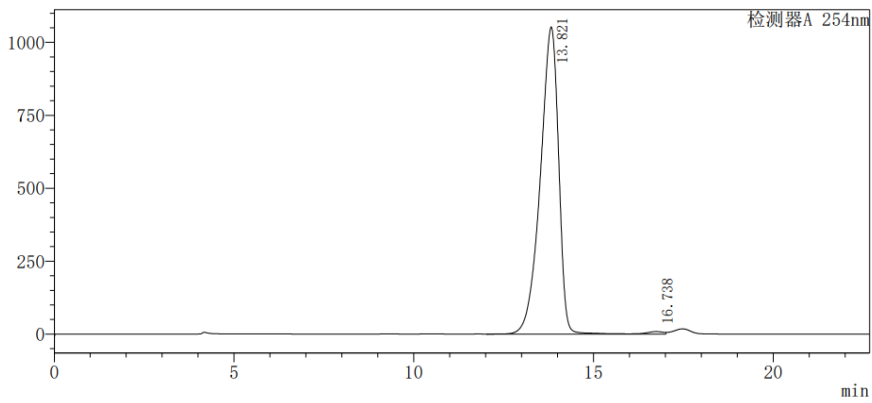

<峰表>

检测器A 254nm

| 峰号 | 保留时间   | 面积       | 高度      | 浓度     | 浓度单位 | 标记 | 化合物名 |
|----|--------|----------|---------|--------|------|----|------|
| 1  | 13.821 | 37315946 | 1052761 | 99.236 |      |    |      |
| 2  | 16.738 | 287295   | 8763    | 0.764  |      | V  |      |
| 总计 |        | 37603241 | 1061524 |        |      |    |      |

画

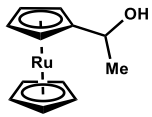

(±)-S12

<色谱图>

mV

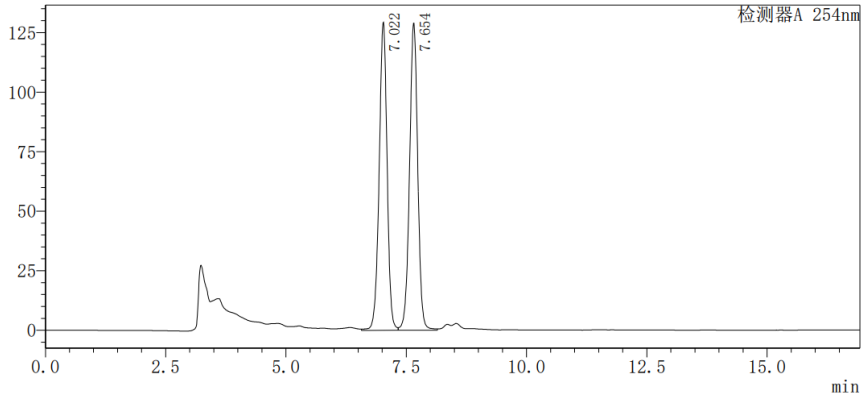

<峰表>

检测器A 254nm

| 峰号 | 保留时间  | 面积      | 高度     | 浓度     | 浓度单位 | 标记 | 化合物名 |
|----|-------|---------|--------|--------|------|----|------|
| 1  | 7.022 | 1489680 | 129352 | 49.302 |      |    |      |
| 2  | 7.654 | 1531853 | 128928 | 50.698 |      | V  |      |
| 总计 |       | 3021533 | 258280 |        |      |    |      |

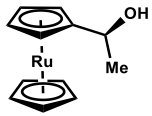

(S)-S12

<色谱图>

mV

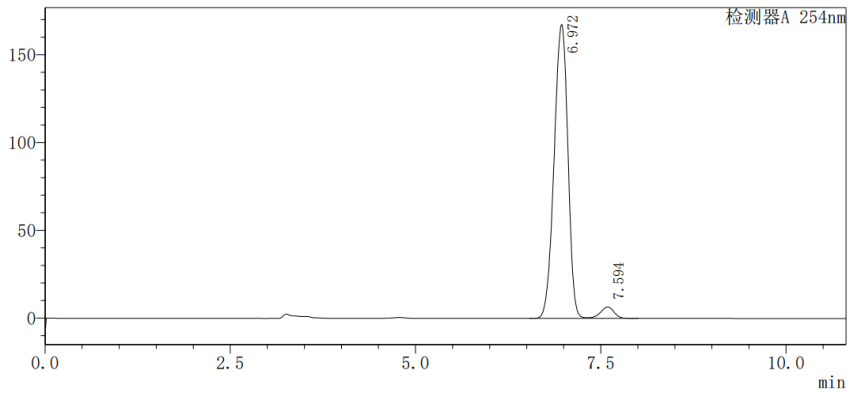

<峰表>

检测器A 254nm

| 峰号 | 保留时间  | 面积      | 高度     | 浓度     | 浓度单位 | 标记 | 化合物名 |
|----|-------|---------|--------|--------|------|----|------|
| 1  | 6.972 | 2163047 | 167325 | 96.353 |      |    |      |
| 2  | 7.594 | 81867   | 6429   | 3.647  |      | V  |      |
| 总计 |       | 2244913 | 173754 |        |      |    |      |

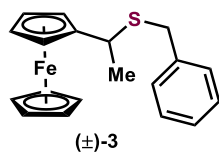

<色谱图>

mV

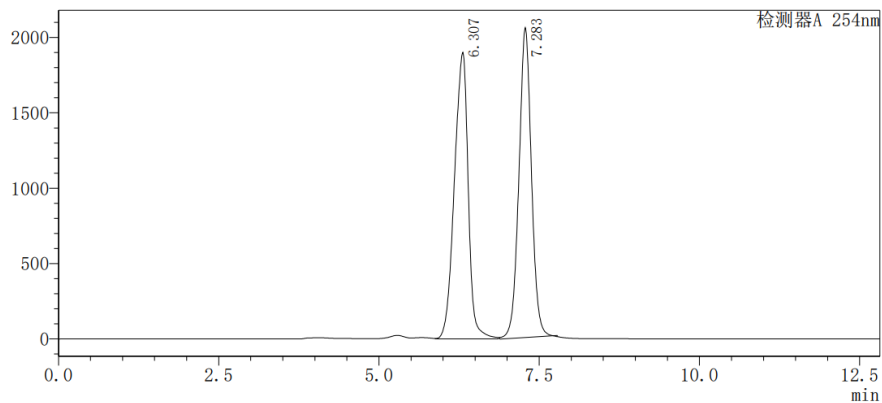

<峰表>

检测器A 254nm

| 峰号 | 保留时间  | 面积       | 高度      | 浓度     | 浓度单位 | 标记 | 化合物名 |
|----|-------|----------|---------|--------|------|----|------|
| 1  | 6.307 | 28561446 | 1901791 | 50.588 |      |    |      |
| 2  | 7.283 | 27897532 | 2055068 | 49.412 |      | M  |      |
| 总计 |       | 56458978 | 3956859 |        |      |    |      |

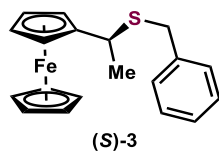

<色谱图>

mV

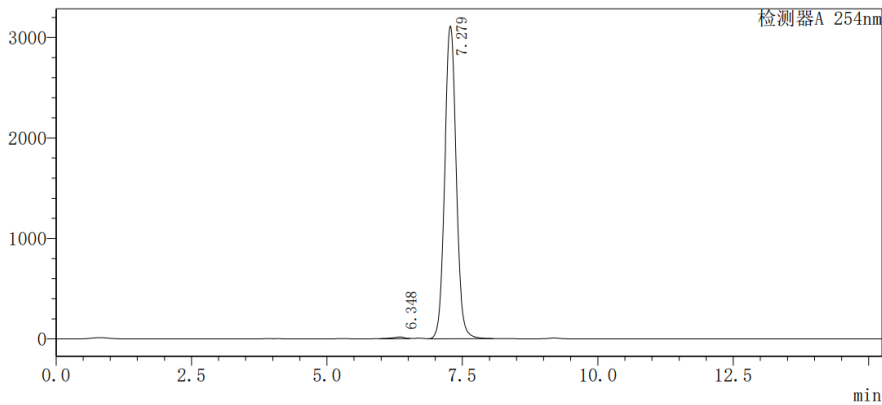

<峰表>

检测器A 254nm

| 峰号 | 保留时间  | 面积       | 高度      | 浓度     | 浓度单位 | 标记 | 化合物名 |
|----|-------|----------|---------|--------|------|----|------|
| 1  | 6.348 | 298139   | 18012   | 0.645  |      | M  |      |
| 2  | 7.279 | 45940995 | 3110364 | 99.355 |      | M  |      |
| 总计 |       | 46239135 | 3128375 |        |      |    |      |

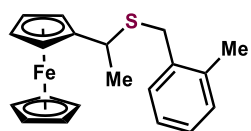

(±)-4

<色谱图>

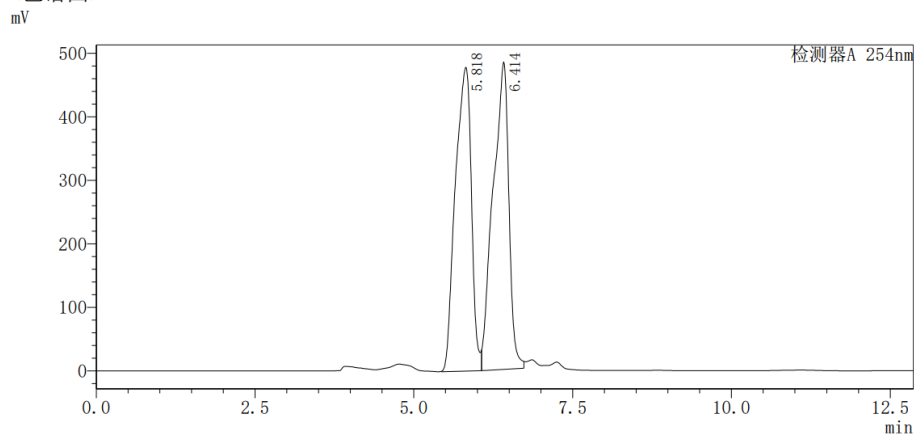

<峰表>

检测器A 254nm

| 峰号 | 保留时间  | 面积       | 高度     | 浓度     | 浓度单位 | 标记 | 化合物名 |
|----|-------|----------|--------|--------|------|----|------|
| 1  | 5.818 | 8405099  | 478198 | 50.109 |      | M  |      |
| 2  | 6.414 | 8368679  | 483476 | 49.891 |      | M  |      |
| 总计 |       | 16773778 | 961674 |        |      |    |      |

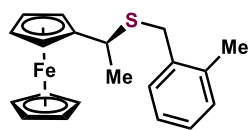

(S)-4

<色谱图>

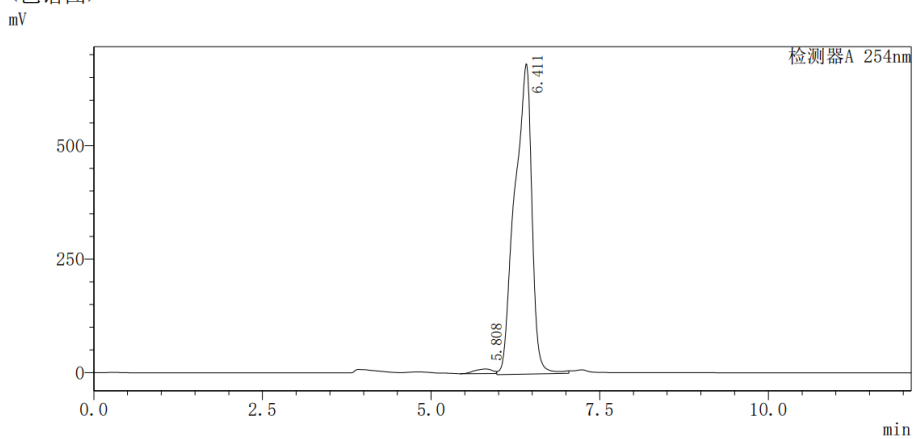

<峰表>

检测器A 254nm

| 峰号 | 保留时间  | 面积       | 高度     | 浓度     | 浓度单位 | 标记 | 化合物名 |
|----|-------|----------|--------|--------|------|----|------|
| 1  | 5.808 | 183331   | 9915   | 1.495  |      |    |      |
| 2  | 6.411 | 12077219 | 682766 | 98.505 |      | M  |      |
| 总计 |       | 12260550 | 692681 |        |      |    |      |

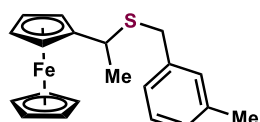

(±)-5

<色谱图>

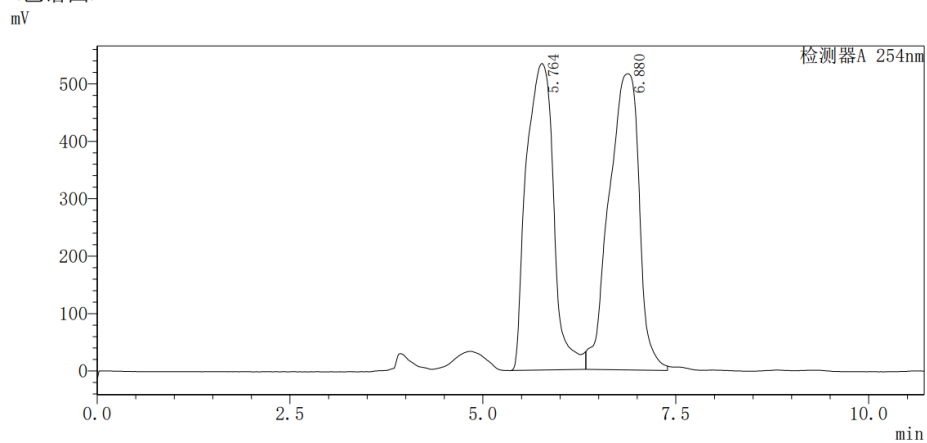

<峰表>

检测器A 254nm

| 峰号 | 保留时间  | 面积       | 高度      | 浓度     | 浓度单位 | 标记 | 化合物名 |
|----|-------|----------|---------|--------|------|----|------|
| 1  | 5.764 | 13175654 | 533891  | 48.449 |      | M  |      |
| 2  | 6.880 | 14019174 | 516013  | 51.551 |      | M  |      |
| 总计 |       | 27194828 | 1049904 |        |      |    |      |

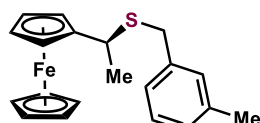

(S)-5

<色谱图>

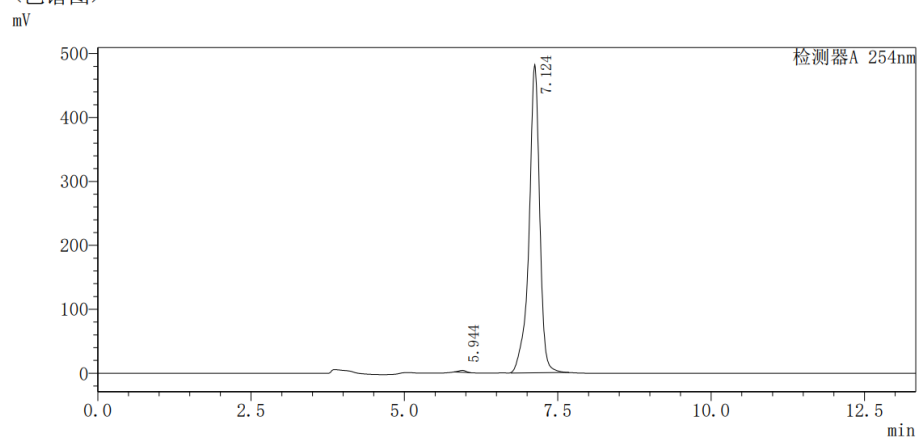

<峰表>

检测器A 254nm

| 峰号 | 保留时间  | 面积      | 高度     | 浓度     | 浓度单位 | 标记 | 化合物名 |
|----|-------|---------|--------|--------|------|----|------|
| 1  | 5.944 | 24252   | 3026   | 0.415  |      | M  |      |
| 2  | 7.124 | 5820710 | 481451 | 99.585 |      | M  |      |
| 总计 |       | 5844962 | 484477 |        |      |    |      |

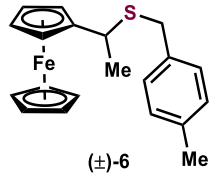

<色谱图>

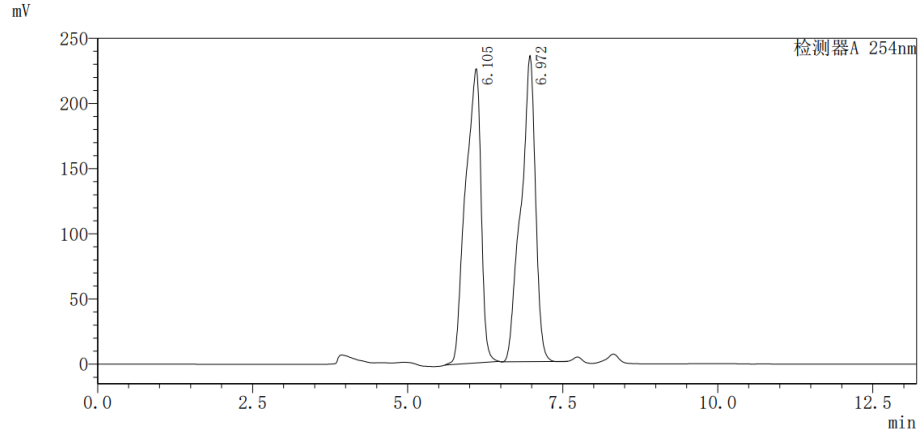

<峰表>

| 检测器A 254nm |       |         |        |        |      |    |      |
|------------|-------|---------|--------|--------|------|----|------|
| 峰号         | 保留时间  | 面积      | 高度     | 浓度     | 浓度单位 | 标记 | 化合物名 |
| 1          | 6.105 | 3915383 | 225597 | 50.470 |      | M  |      |
| 2          | 6.972 | 3842477 | 234668 | 49.530 |      | M  |      |
| 总计         |       | 7757861 | 460264 |        |      |    |      |

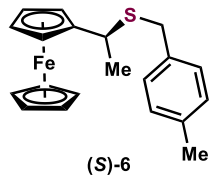

<色谱图>

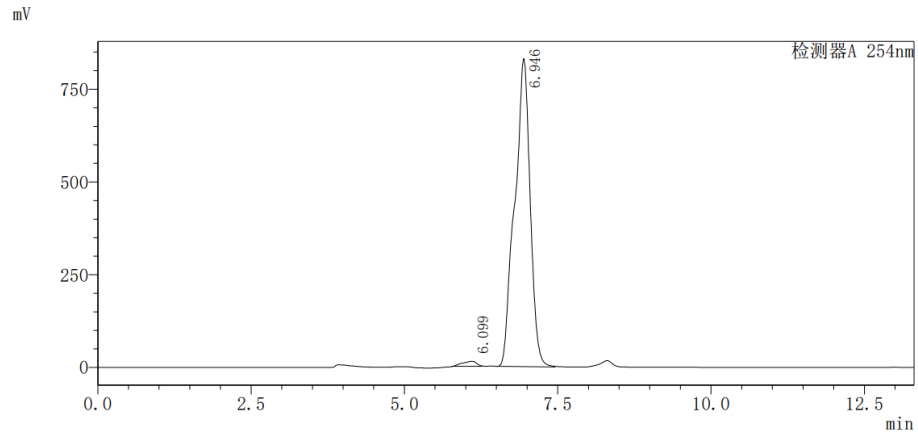

<峰表>

| 检测器A 254nm |       |          |        |        |      |    |      |
|------------|-------|----------|--------|--------|------|----|------|
| 峰号         | 保留时间  | 面积       | 高度     | 浓度     | 浓度单位 | 标记 | 化合物名 |
| 1          | 6.099 | 211310   | 13366  | 1.432  |      | M  |      |
| 2          | 6.946 | 14543052 | 829875 | 98.568 |      | M  |      |
| 总计         |       | 14754363 | 843241 |        |      |    |      |

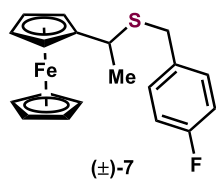

<色谱图>

mV

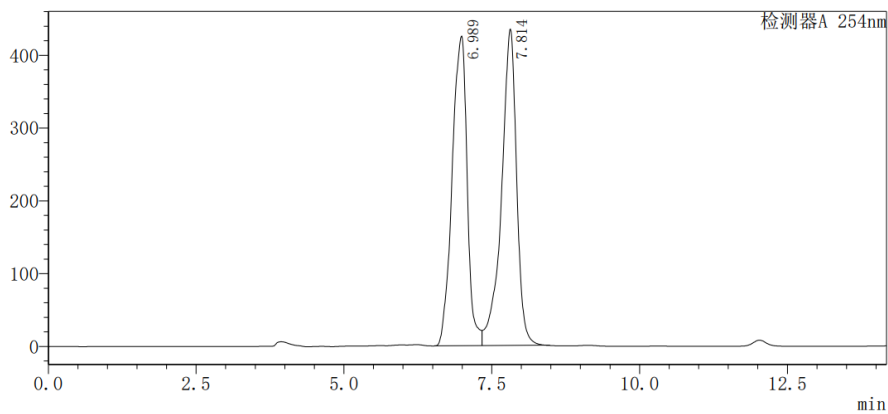

<峰表>

检测器A 254nm

| 峰号 | 保留时间  | 面积       | 高度     | 浓度     | 浓度单位 | 标记  | 化合物名 |
|----|-------|----------|--------|--------|------|-----|------|
| 1  | 6.989 | 7514352  | 425330 | 49.266 |      | M   |      |
| 2  | 7.814 | 7738296  | 434399 | 50.734 |      | V M |      |
| 总计 |       | 15252648 | 859729 |        |      |     |      |

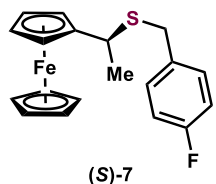

<色谱图>

mV

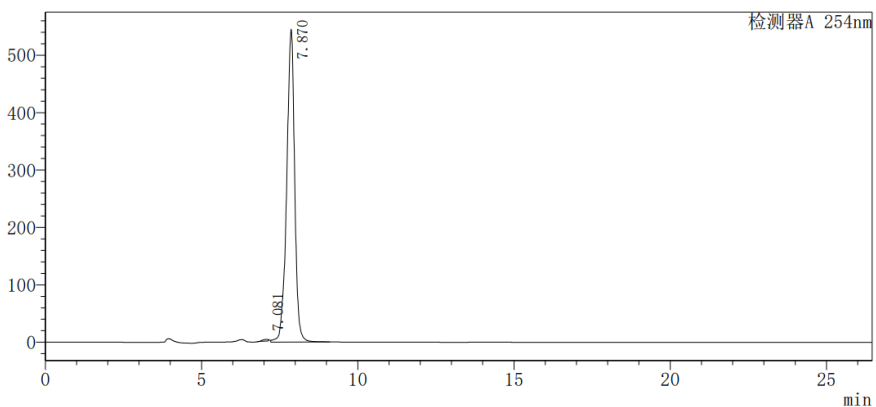

<峰表>

检测器A 254nm

| 峰号 | 保留时间  | 面积      | 高度     | 浓度     | 浓度单位 | 标记 | 化合物名 |
|----|-------|---------|--------|--------|------|----|------|
| 1  | 7.081 | 35953   | 3023   | 0.370  |      | M  |      |
| 2  | 7.870 | 9685564 | 544322 | 99.630 |      | M  |      |
| 总计 |       | 9721517 | 547345 |        |      |    |      |

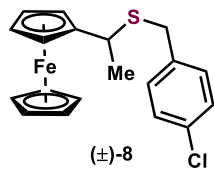

<色谱图>

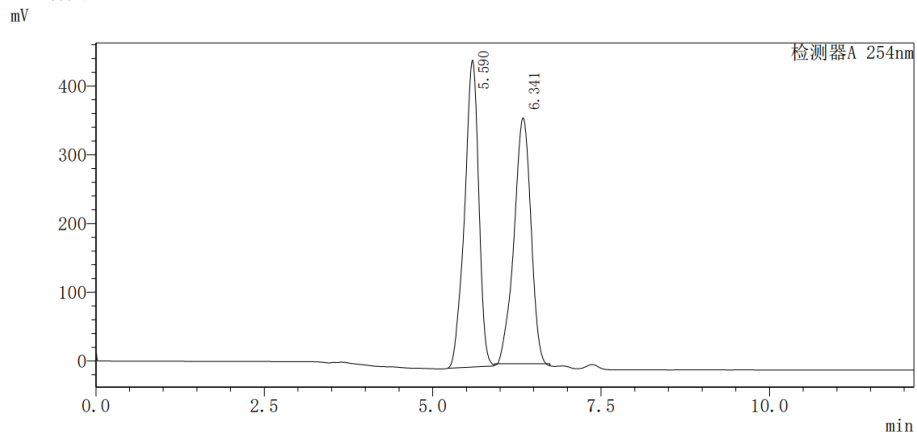

<峰表>

检测器A 254nm

| 峰号 | 保留时间  | 面积       | 高度     | 浓度     | 浓度单位 | 标记 | 化合物名 |
|----|-------|----------|--------|--------|------|----|------|
| 1  | 5.590 | 6538541  | 446298 | 51.171 |      | M  |      |
| 2  | 6.341 | 6239364  | 357638 | 48.829 |      | M  |      |
| 总计 |       | 12777905 | 803935 |        |      |    |      |

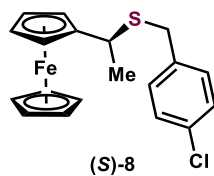

<色谱图>

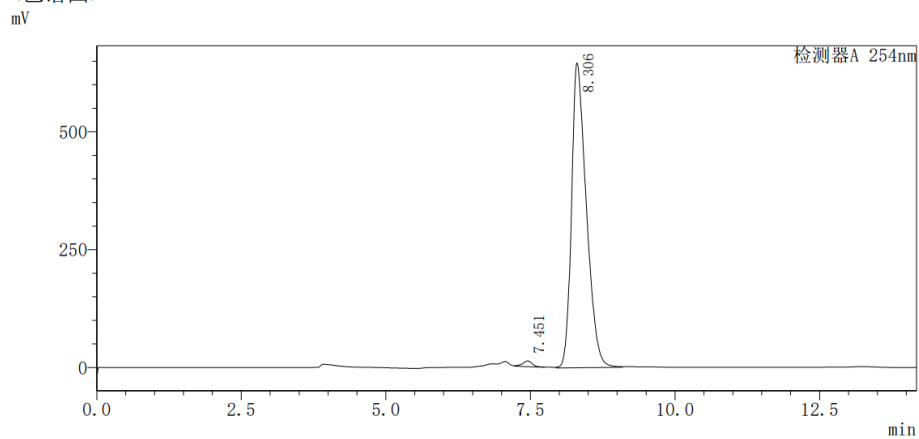

<峰表>

检测器A 254nm

| 峰号 | 保留时间  | 面积       | 高度     | 浓度     | 浓度单位 | 标记 | 化合物名 |
|----|-------|----------|--------|--------|------|----|------|
| 1  | 7.451 | 144204   | 12206  | 1.234  |      | M  |      |
| 2  | 8.306 | 11537580 | 646240 | 98.766 |      | M  |      |
| 总计 |       | 11681784 | 658446 |        |      |    |      |

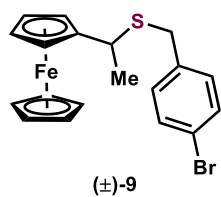

<色谱图>

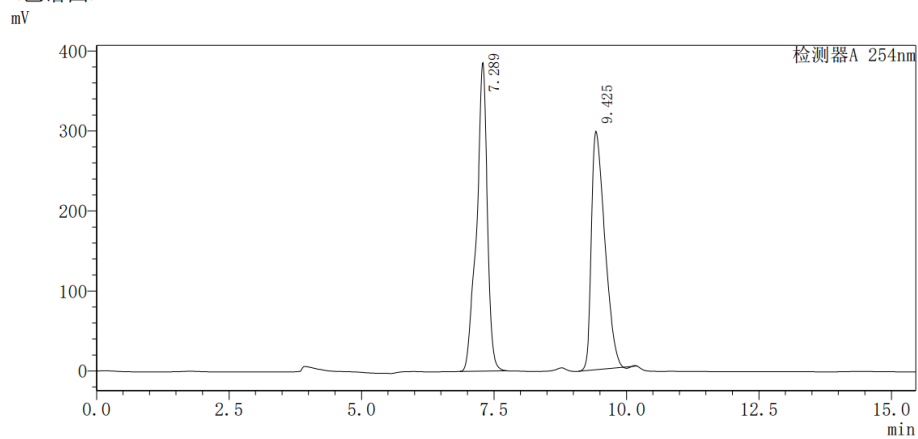

<峰表>

检测器A 254nm

| 峰号 | 保留时间  | 面积       | 高度     | 浓度     | 浓度单位 | 标记 | 化合物名 |
|----|-------|----------|--------|--------|------|----|------|
| 1  | 7.289 | 5428649  | 385382 | 50.760 |      | M  |      |
| 2  | 9.425 | 5266120  | 298146 | 49.240 |      | M  |      |
| 总计 |       | 10694768 | 683528 |        |      |    |      |

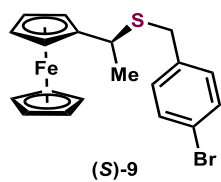

<色谱图>

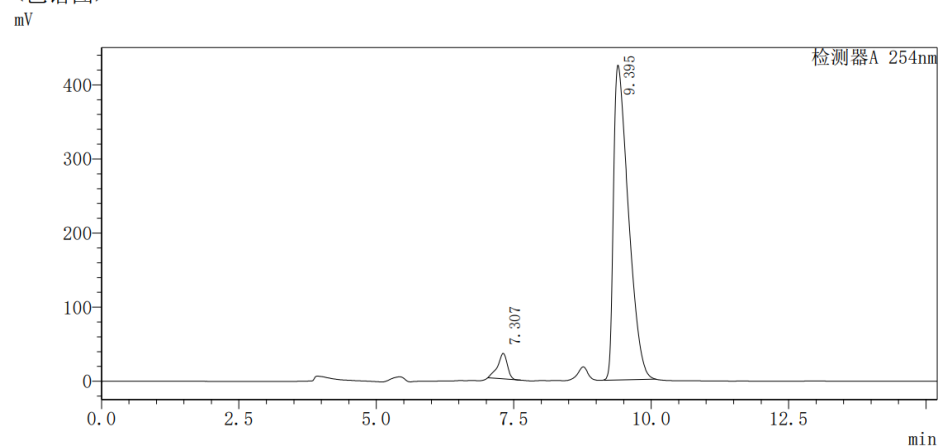

<峰表>

检测器A 254nm

| 峰号 | 保留时间  | 面积      | 高度     | 浓度     | 浓度单位 | 标记 | 化合物名 |
|----|-------|---------|--------|--------|------|----|------|
| 1  | 7.307 | 424608  | 34498  | 5.028  |      | M  |      |
| 2  | 9.395 | 8019898 | 424594 | 94.972 |      | M  |      |
| 总计 |       | 8444506 | 459092 |        |      |    |      |

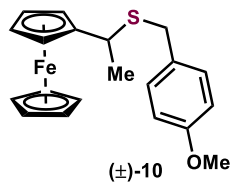

<色谱图>

mV

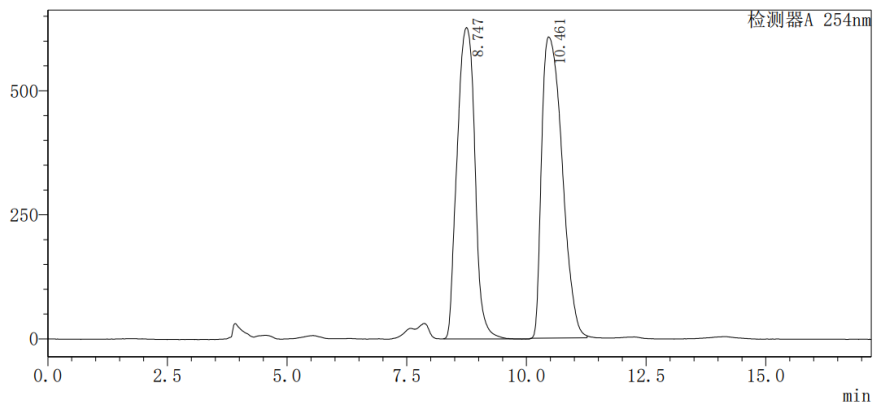

<峰表>

检测器A 254nm

| 峰号 | 保留时间   | 面积       | 高度      | 浓度     | 浓度单位 | 标记 | 化合物名 |
|----|--------|----------|---------|--------|------|----|------|
| 1  | 8.747  | 16217444 | 627537  | 47.285 |      | M  |      |
| 2  | 10.461 | 18079809 | 606671  | 52.715 |      | M  |      |
| 总计 |        | 34297253 | 1234208 |        |      |    |      |

[画]

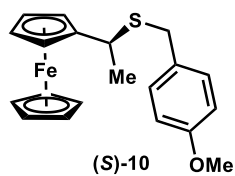

<色谱图>

mV

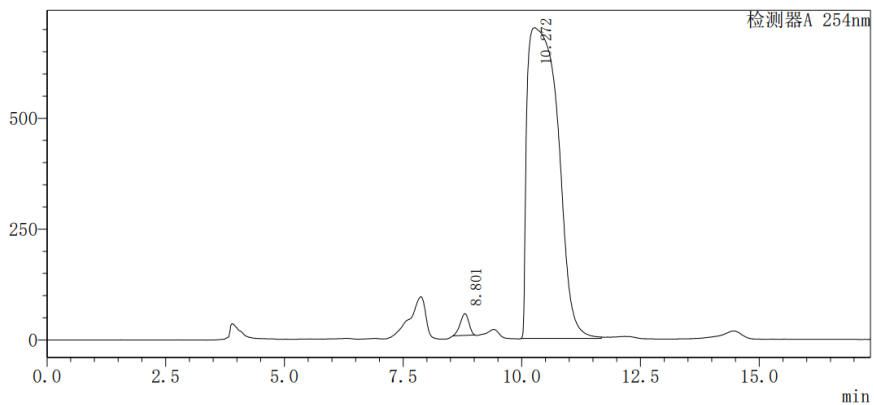

<峰表>

检测器A 254nm

| 峰号 | 保留时间   | 面积       | 高度     | 浓度     | 浓度单位 | 标记 | 化合物名 |
|----|--------|----------|--------|--------|------|----|------|
| 1  | 8.801  | 619259   | 48834  | 1.923  |      | M  |      |
| 2  | 10.272 | 31579908 | 700308 | 98.077 |      | M  |      |
| 总计 |        | 32199167 | 749142 |        |      |    |      |

[画]

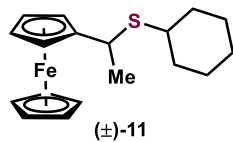

<色谱图>

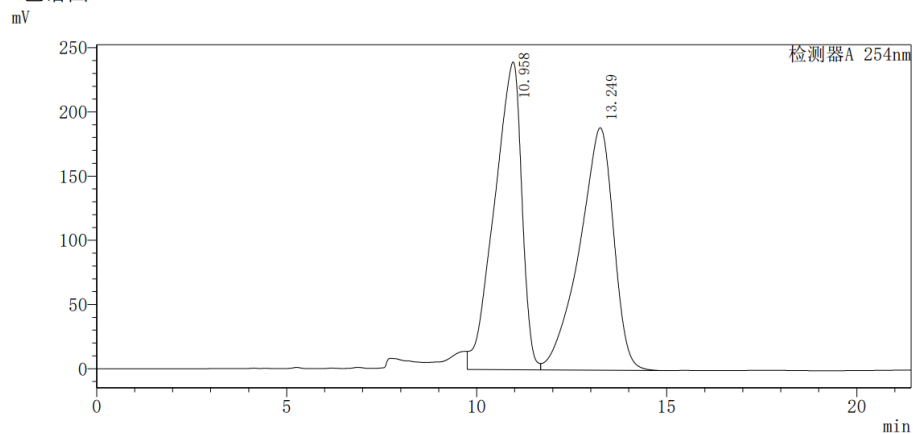

<峰表>

检测器A 254nm

| 峰号 | 保留时间   | 面积       | 高度     | 浓度     | 浓度单位 | 标记 | 化合物名 |
|----|--------|----------|--------|--------|------|----|------|
| 1  | 10.958 | 11957600 | 239696 | 50.256 |      |    |      |
| 2  | 13.249 | 11835662 | 188901 | 49.744 |      | V  |      |
| 总计 |        | 23793262 | 428598 |        |      |    |      |

画

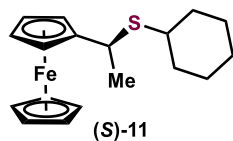

<色谱图>

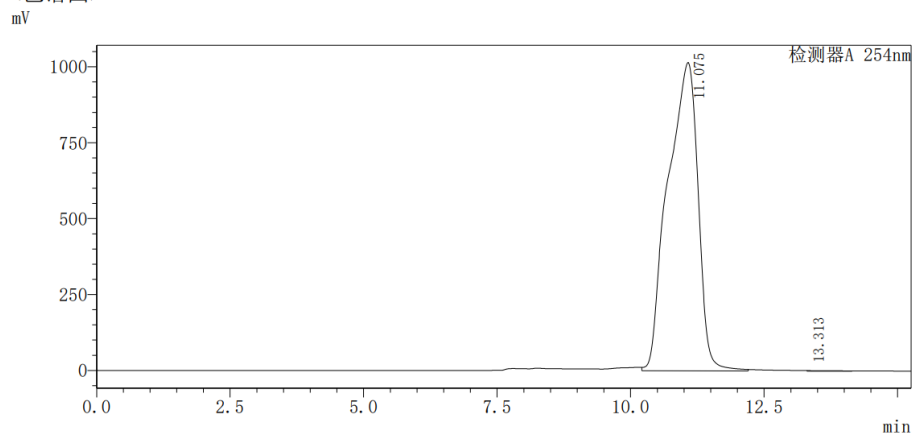

<峰表>

检测器A 254nm

| 峰号 | 保留时间   | 面积       | 高度      | 浓度     | 浓度单位 | 标记 | 化合物名 |
|----|--------|----------|---------|--------|------|----|------|
| 1  | 11.075 | 39882636 | 1015182 | 99.776 |      | M  |      |
| 2  | 13.313 | 89513    | 2323    | 0.224  |      | M  |      |
| 总计 |        | 39972149 | 1017505 |        |      |    |      |

画

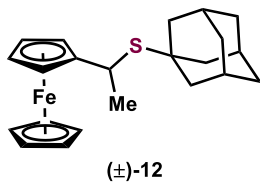

<色谱图>

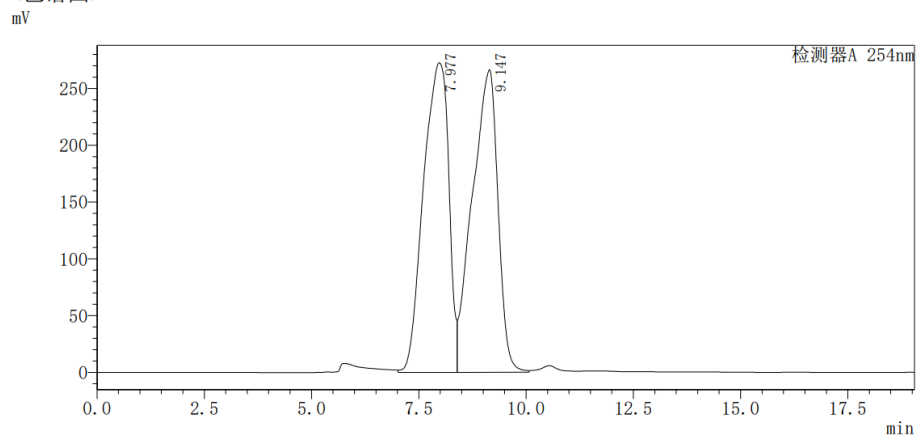

<峰表>

检测器A 254nm

| 峰号 | 保留时间  | 面积       | 高度     | 浓度     | 浓度单位 | 标记 | 化合物名 |
|----|-------|----------|--------|--------|------|----|------|
| 1  | 7.977 | 11184002 | 272577 | 50.220 |      |    |      |
| 2  | 9.147 | 11086118 | 266182 | 49.780 |      | V  |      |
| 总计 |       | 22270120 | 538759 |        |      |    |      |

画

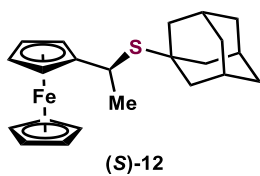

<色谱图>

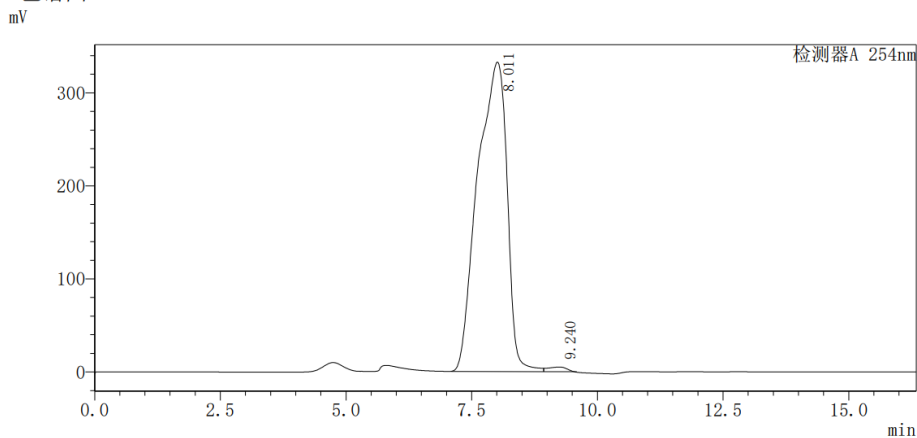

<峰表>

检测器A 254nm

| 峰号 | 保留时间  | 面积       | 高度     | 浓度     | 浓度单位 | 标记  | 化合物名 |
|----|-------|----------|--------|--------|------|-----|------|
| 1  | 8.011 | 13589567 | 332620 | 99.058 |      | M   |      |
| 2  | 9.240 | 129186   | 5003   | 0.942  |      | V M |      |
| 总计 |       | 13718753 | 337622 |        |      |     |      |

画

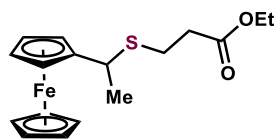

(±)-13

<色谱图>

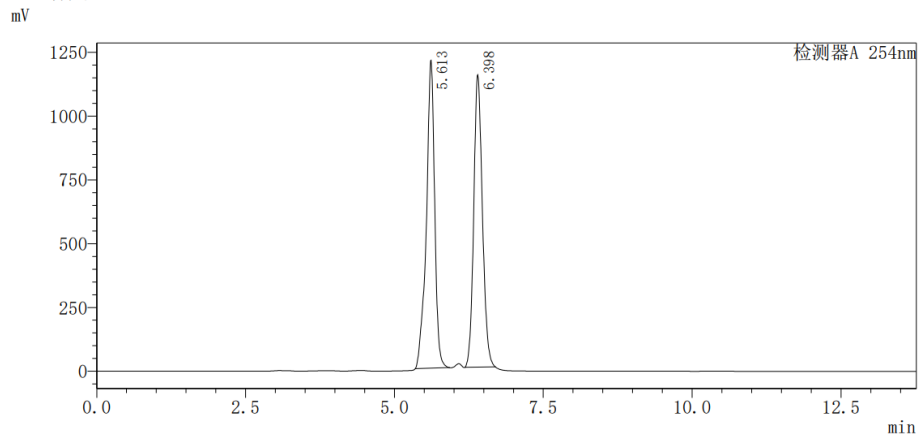

<峰表>

检测器A 254nm

| 峰号 | 保留时间  | 面积       | 高度      | 浓度     | 浓度单位 | 标记 | 化合物名 |
|----|-------|----------|---------|--------|------|----|------|
| 1  | 5.613 | 11750522 | 1206642 | 50.324 |      | M  |      |
| 2  | 6.398 | 11599185 | 1146014 | 49.676 |      | M  |      |
| 总计 |       | 23349707 | 2352656 |        |      |    |      |

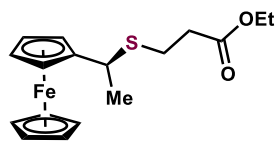

(S)-13

<色谱图>

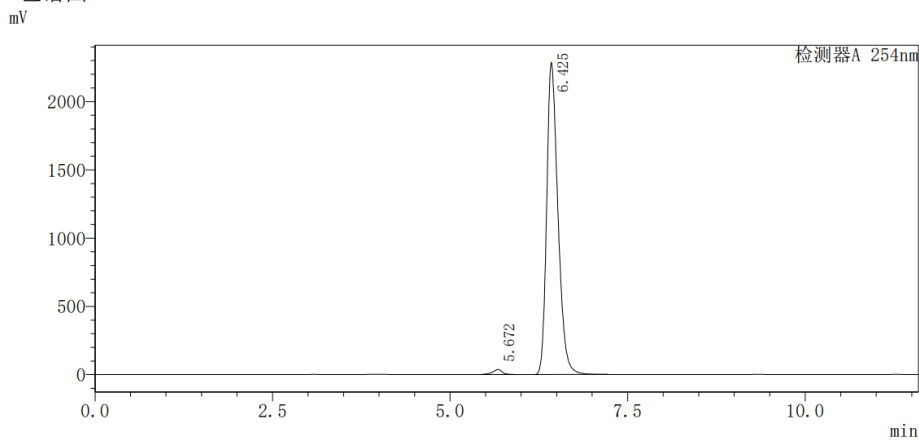

<峰表>

检测器A 254nm

| 峰号 | 保留时间  | 面积       | 高度      | 浓度     | 浓度单位 | 标记 | 化合物名 |
|----|-------|----------|---------|--------|------|----|------|
| 1  | 5.672 | 356513   | 37236   | 1.397  |      | M  |      |
| 2  | 6.425 | 25170096 | 2284118 | 98.603 |      | M  |      |
| 总计 |       | 25526609 | 2321355 |        |      |    |      |

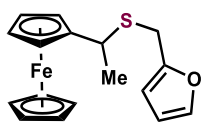

(±)-14

<色谱图>

mV

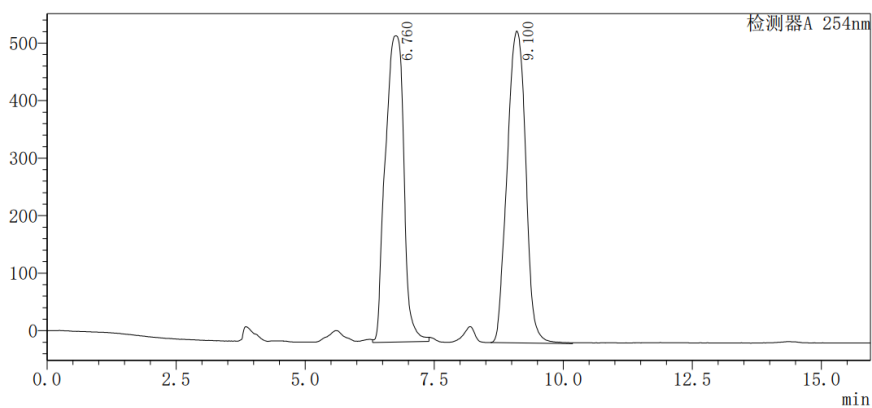

<峰表>

检测器A 254nm

| 峰号 | 保留时间  | 面积       | 高度      | 浓度     | 浓度单位 | 标记 | 化合物名 |
|----|-------|----------|---------|--------|------|----|------|
| 1  | 6.760 | 13238983 | 532215  | 49.393 |      | M  |      |
| 2  | 9.100 | 13564357 | 541985  | 50.607 |      | M  |      |
| 总计 |       | 26803339 | 1074201 |        |      |    |      |

画

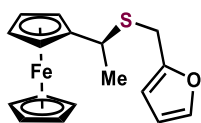

(S)-14

<色谱图>

mV

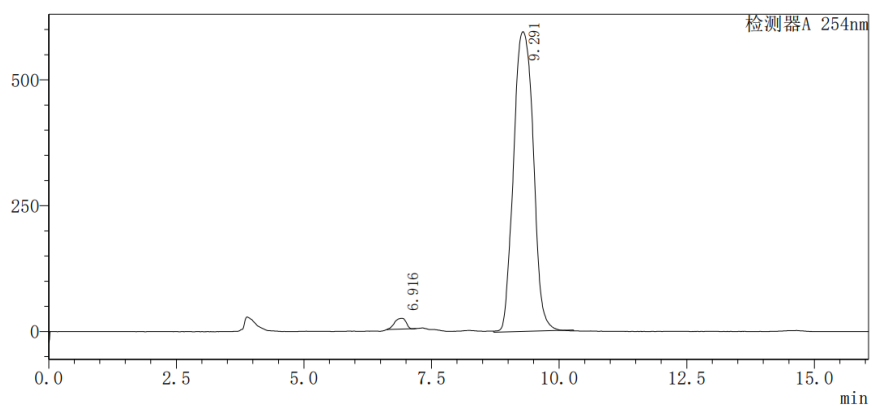

<峰表>

检测器A 254nm

| 峰号 | 保留时间  | 面积       | 高度     | 浓度     | 浓度单位 | 标记 | 化合物名 |
|----|-------|----------|--------|--------|------|----|------|
| 1  | 6.916 | 330332   | 21439  | 2.019  |      | M  |      |
| 2  | 9.291 | 16032273 | 595616 | 97.981 |      | M  |      |
| 总计 |       | 16362605 | 617054 |        |      |    |      |

画

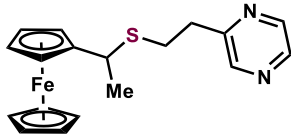

(±)-15

<色谱图>

mV

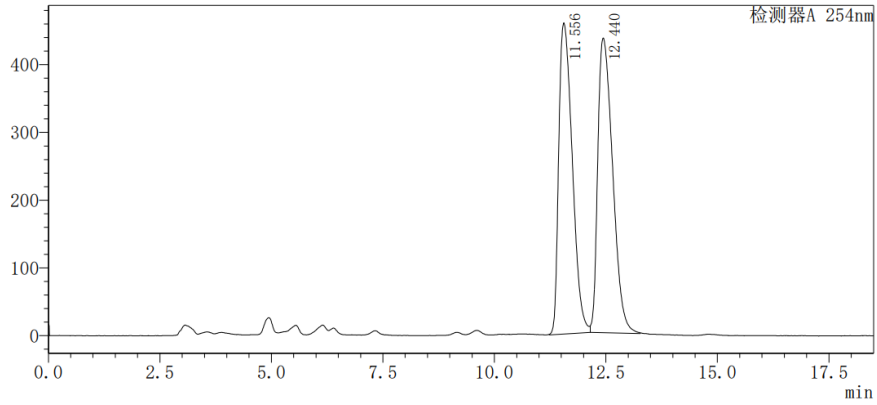

<峰表>

检测器A 254nm

| 峰号 | 保留时间   | 面积       | 高度     | 浓度     | 浓度单位 | 标记 | 化合物名 |
|----|--------|----------|--------|--------|------|----|------|
| 1  | 11.556 | 9690687  | 459331 | 48.956 |      | M  |      |
| 2  | 12.440 | 10103906 | 435201 | 51.044 |      | M  |      |
| 总计 |        | 19794593 | 894533 |        |      |    |      |

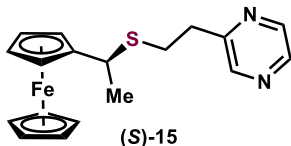

(S)-15

<色谱图>

mV

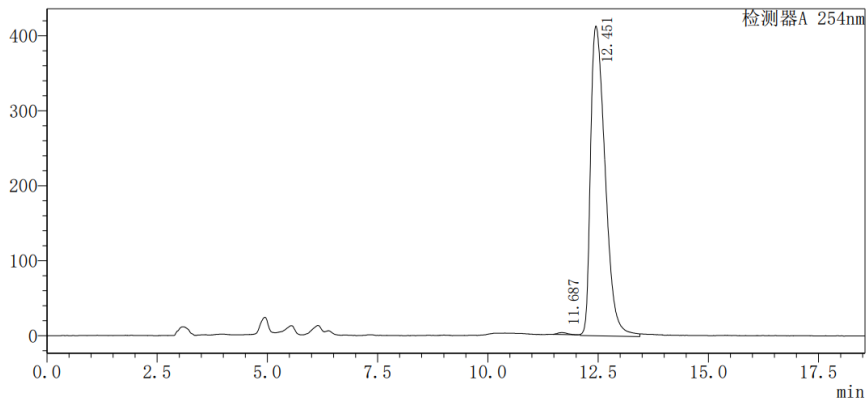

<峰表>

检测器A 254nm

| 峰号 | 保留时间   | 面积      | 高度     | 浓度     | 浓度单位 | 标记 | 化合物名 |
|----|--------|---------|--------|--------|------|----|------|
| 1  | 11.687 | 37536   | 2498   | 0.394  |      | M  |      |
| 2  | 12.451 | 9492963 | 413010 | 99.606 |      | M  |      |
| 总计 |        | 9530499 | 415508 |        |      |    |      |

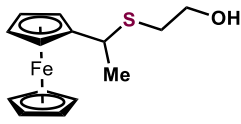

(±)-16

<色谱图>

mV

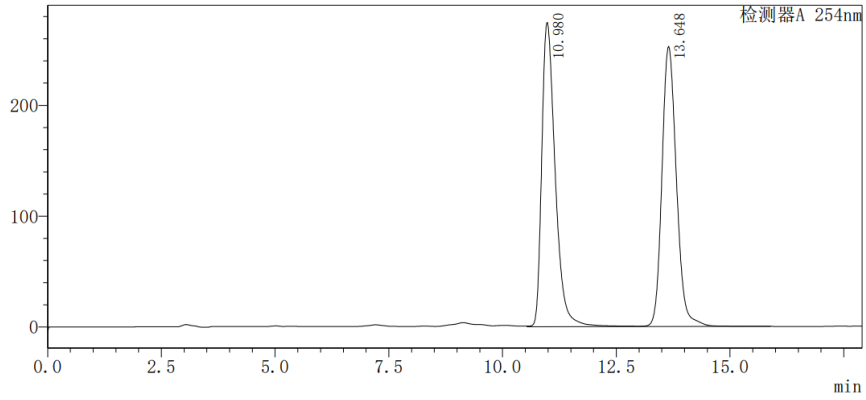

<峰表>

检测器A 254nm

| 峰号 | 保留时间   | 面积       | 高度     | 浓度     | 浓度单位 | 标记 | 化合物名 |
|----|--------|----------|--------|--------|------|----|------|
| 1  | 10.980 | 5676129  | 274421 | 50.270 |      |    |      |
| 2  | 13.648 | 5615167  | 252646 | 49.730 |      | V  |      |
| 总计 |        | 11291296 | 527067 |        |      |    |      |

画

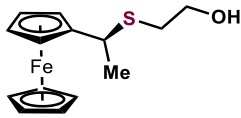

(S)-16

<色谱图>

mV

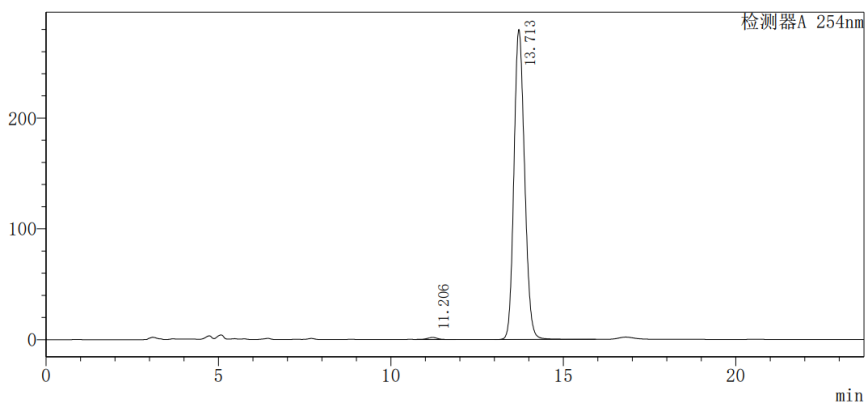

<峰表>

检测器A 254nm

| 峰号 | 保留时间   | 面积      | 高度     | 浓度     | 浓度单位 | 标记 | 化合物名 |
|----|--------|---------|--------|--------|------|----|------|
| 1  | 11.206 | 38256   | 1849   | 0.632  |      |    |      |
| 2  | 13.713 | 6014158 | 279779 | 99.368 |      | M  |      |
| 总计 |        | 6052414 | 281628 |        |      |    |      |

画

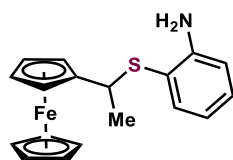

(±)-17

<色谱图>

mV

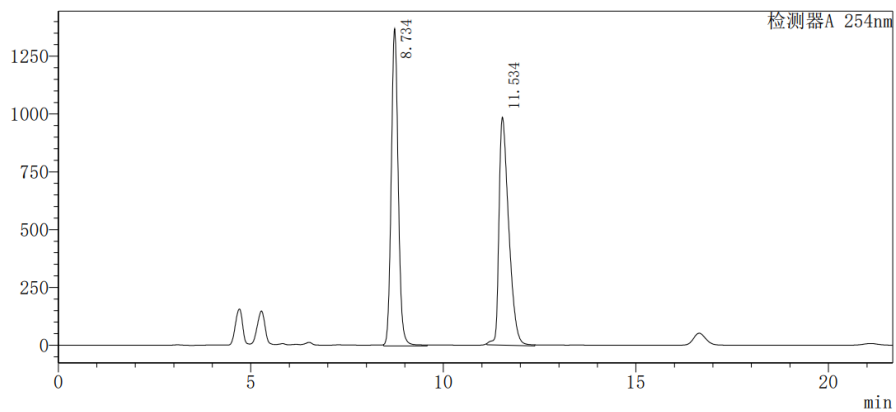

<峰表>

检测器A 254nm

| 峰号 | 保留时间   | 面积       | 高度      | 浓度     | 浓度单位 | 标记 | 化合物名 |
|----|--------|----------|---------|--------|------|----|------|
| 1  | 8.734  | 17356776 | 1371079 | 49.924 |      | M  |      |
| 2  | 11.534 | 17409474 | 985647  | 50.076 |      | M  |      |
| 总计 |        | 34766249 | 2356726 |        |      |    |      |

画

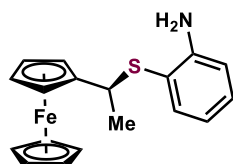

(S)-17

<色谱图>

mV

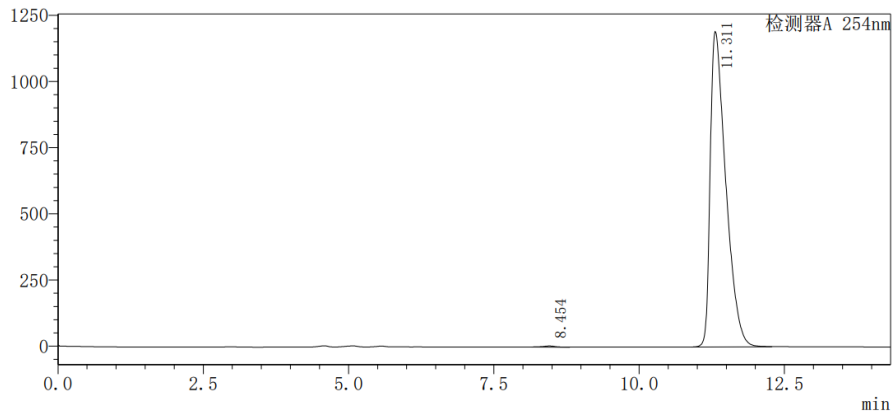

<峰表>

检测器A 254nm

| 峰号 | 保留时间   | 面积       | 高度      | 浓度     | 浓度单位 | 标记 | 化合物名 |
|----|--------|----------|---------|--------|------|----|------|
| 1  | 8.454  | 67748    | 4344    | 0.304  |      | M  |      |
| 2  | 11.311 | 22223138 | 1191286 | 99.696 |      | M  |      |
| 总计 |        | 22290887 | 1195630 |        |      |    |      |

画

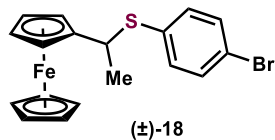

<色谱图>

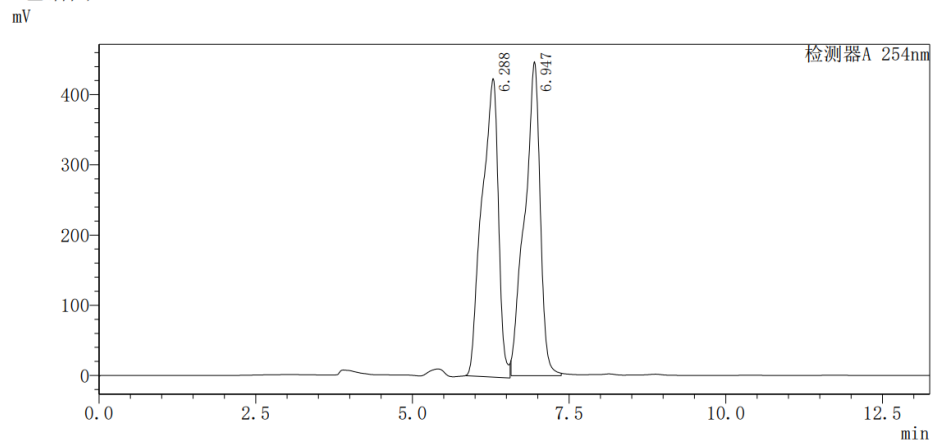

<峰表>

| 检测器A 254nm |       |          |        |        |      |      |
|------------|-------|----------|--------|--------|------|------|
| 峰号         | 保留时间  | 面积       | 高度     | 浓度     | 浓度单位 | 化合物名 |
| 1          | 6.288 | 7761315  | 424967 | 50.137 |      | M    |
| 2          | 6.947 | 7718838  | 446891 | 49.863 |      | M    |
| 总计         |       | 15480153 | 871858 |        |      |      |

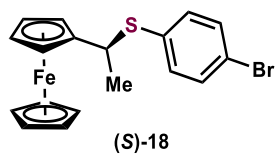

<色谱图>

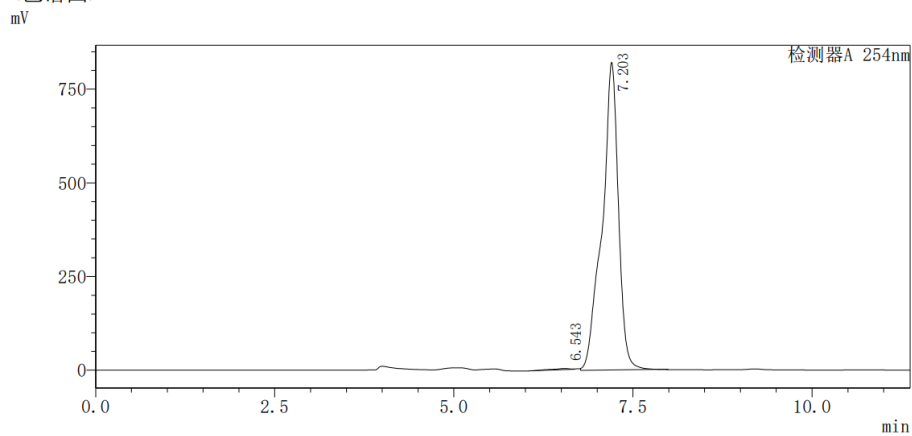

<峰表>

| 检测器A 254nm |       |          |        |        |      |      |
|------------|-------|----------|--------|--------|------|------|
| 峰号         | 保留时间  | 面积       | 高度     | 浓度     | 浓度单位 | 化合物名 |
| 1          | 6.543 | 53650    | 3004   | 0.411  |      | M    |
| 2          | 7.203 | 13003652 | 820353 | 99.589 |      | M    |
| 总计         |       | 13057302 | 823357 |        |      |      |

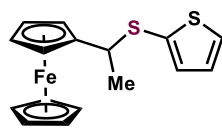

(±)-19

<色谱图>

mV

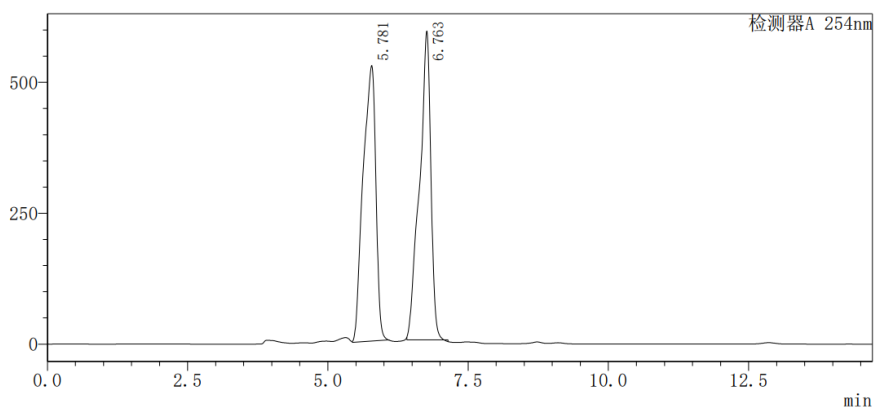

<峰表>

检测器A 254nm

| 峰号 | 保留时间  | 面积       | 高度      | 浓度     | 浓度单位 | 标记 | 化合物名 |
|----|-------|----------|---------|--------|------|----|------|
| 1  | 5.781 | 8322216  | 526338  | 49.982 |      | M  |      |
| 2  | 6.763 | 8328250  | 589475  | 50.018 |      | M  |      |
| 总计 |       | 16650465 | 1115814 |        |      |    |      |

画

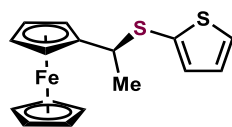

(S)-19

<色谱图>

mV

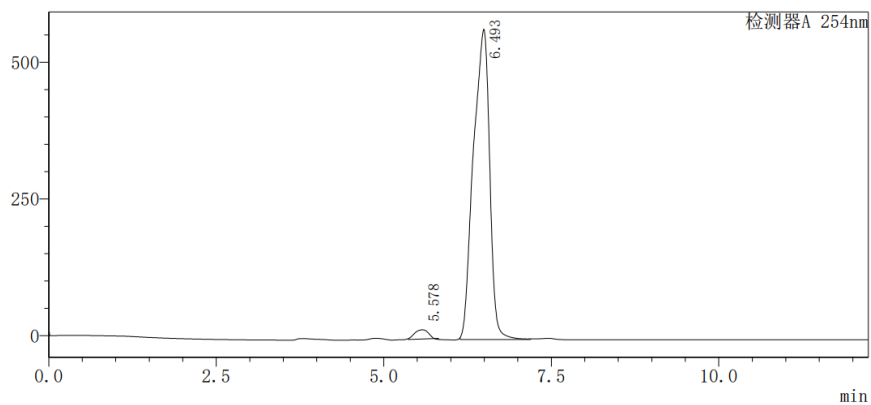

<峰表>

检测器A 254nm

| 峰号 | 保留时间  | 面积      | 高度     | 浓度     | 浓度单位 | 标记 | 化合物名 |
|----|-------|---------|--------|--------|------|----|------|
| 1  | 5.578 | 231956  | 16688  | 2.369  |      | M  |      |
| 2  | 6.493 | 9561329 | 567582 | 97.631 |      | M  |      |
| 总计 |       | 9793286 | 584270 |        |      |    |      |

画

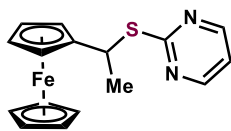

(±)-20

<色谱图>

mV

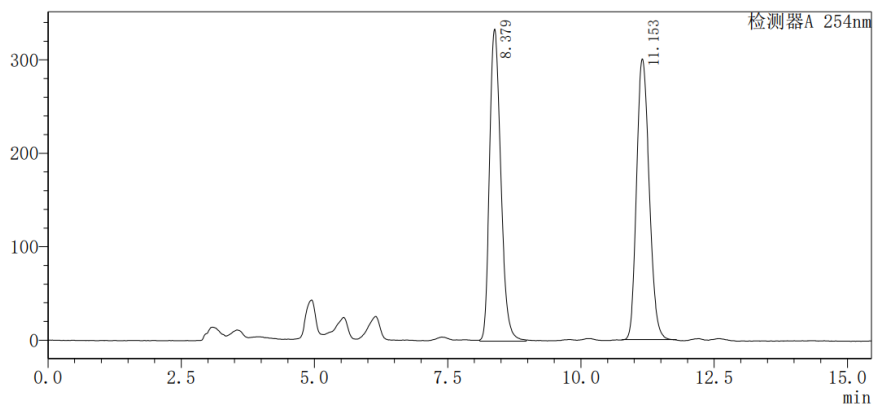

<峰表>

检测器A 254nm

| 峰号 | 保留时间   | 面积      | 高度     | 浓度     | 浓度单位 | 标记 | 化合物名 |
|----|--------|---------|--------|--------|------|----|------|
| 1  | 8.379  | 4926124 | 333705 | 49.925 |      | M  |      |
| 2  | 11.153 | 4940984 | 300344 | 50.075 |      | M  |      |
| 总计 |        | 9867109 | 634049 |        |      |    |      |

画

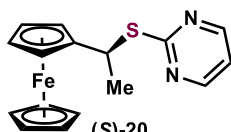

(S)-20

<色谱图>

mV

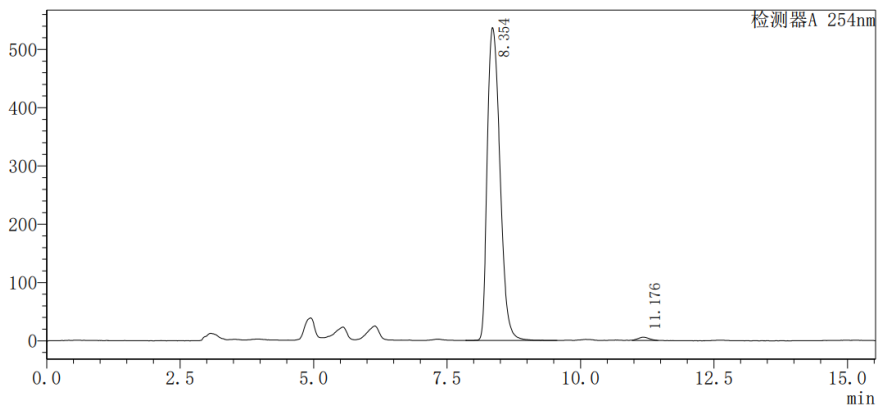

<峰表>

检测器A 254nm

| 峰号 | 保留时间   | 面积      | 高度     | 浓度     | 浓度单位 | 标记 | 化合物名 |
|----|--------|---------|--------|--------|------|----|------|
| 1  | 8.354  | 8897870 | 536845 | 99.108 |      | M  |      |
| 2  | 11.176 | 80101   | 5601   | 0.892  |      | M  |      |
| 总计 |        | 8977971 | 542445 |        |      |    |      |

画

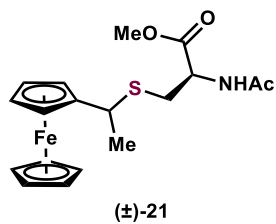

<色谱图>

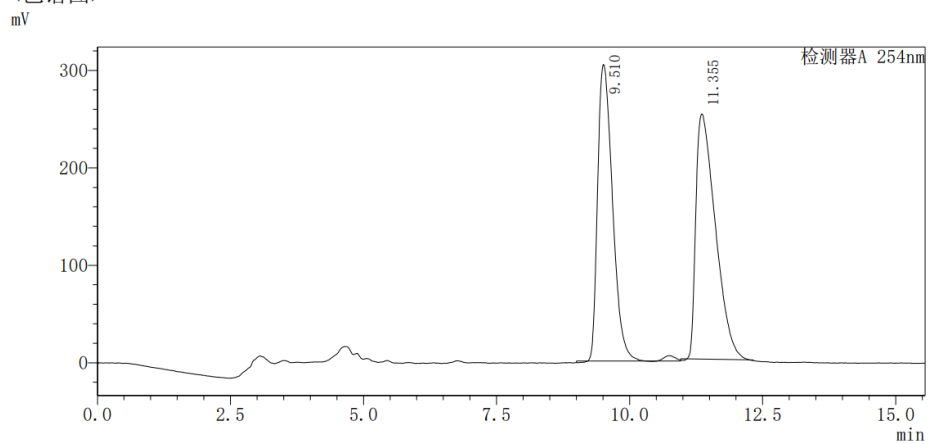

<峰表>

检测器A 254nm

| 峰号 | 保留时间   | 面积       | 高度     | 浓度     | 浓度单位 | 标记 | 化合物名 |
|----|--------|----------|--------|--------|------|----|------|
| 1  | 9.510  | 5994370  | 304368 | 48.300 |      | M  |      |
| 2  | 11.355 | 6416367  | 251628 | 51.700 |      | M  |      |
| 总计 |        | 12410737 | 555996 |        |      |    |      |

画

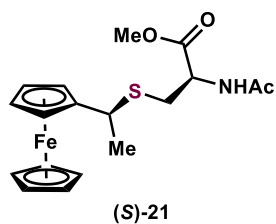

<色谱图>

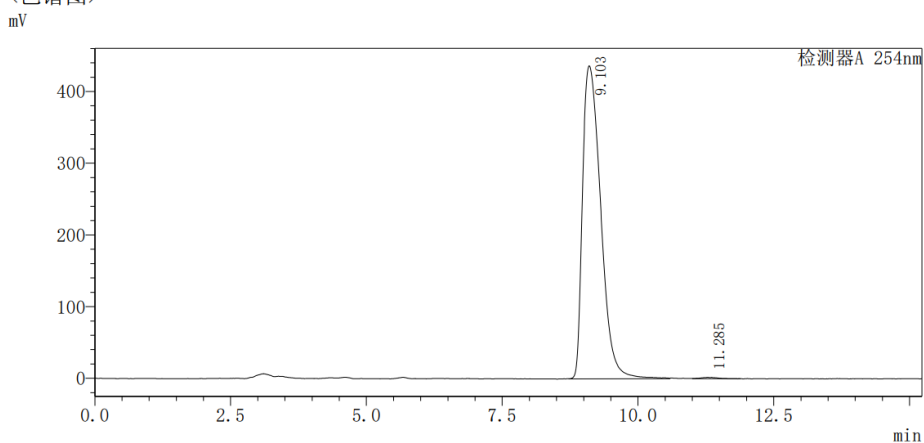

<峰表>

检测器A 254nm

| 峰号 | 保留时间   | 面积       | 高度     | 浓度     | 浓度单位 | 标记 | 化合物名 |
|----|--------|----------|--------|--------|------|----|------|
| 1  | 9.103  | 10192583 | 436499 | 99.676 |      | M  |      |
| 2  | 11.285 | 33108    | 1768   | 0.324  |      | M  |      |
| 总计 |        | 10225691 | 438267 |        |      |    |      |

画

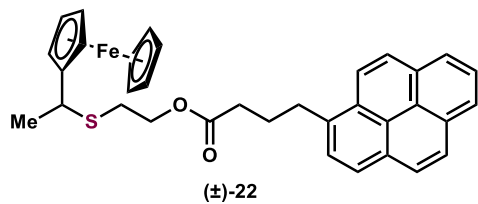

<色谱图>  
mV

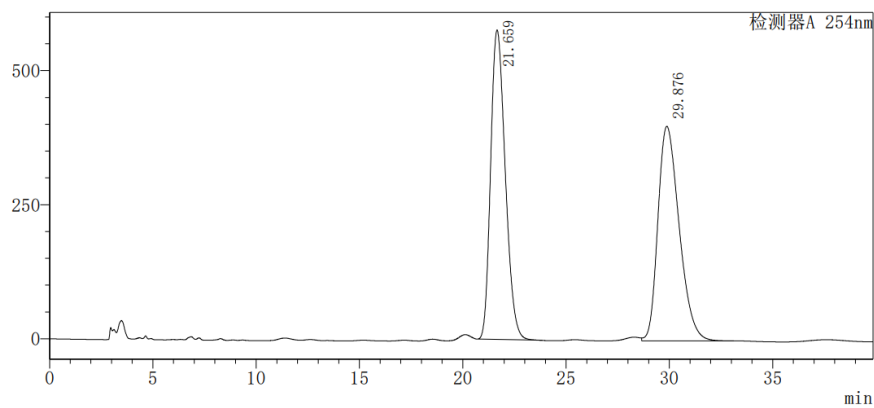

<峰表>

检测器A 254nm

| 峰号 | 保留时间   | 面积       | 高度     | 浓度     | 浓度单位 | 标记 | 化合物名 |
|----|--------|----------|--------|--------|------|----|------|
| 1  | 21.659 | 28333092 | 576740 | 49.756 |      | M  |      |
| 2  | 29.876 | 28611250 | 400179 | 50.244 |      |    |      |
| 总计 |        | 56944341 | 976919 |        |      |    |      |

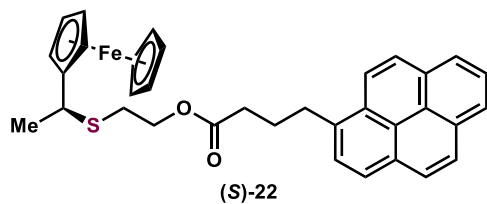

<色谱图>  
mV

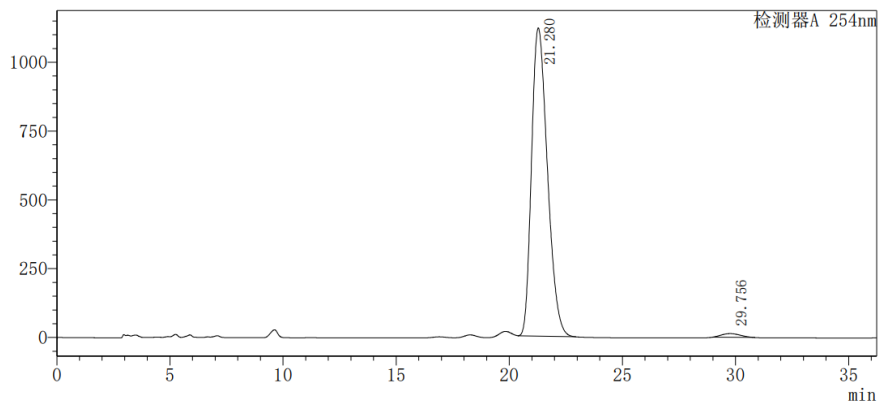

<峰表>

检测器A 254nm

| 峰号 | 保留时间   | 面积       | 高度      | 浓度     | 浓度单位 | 标记 | 化合物名 |
|----|--------|----------|---------|--------|------|----|------|
| 1  | 21.280 | 54724057 | 1119994 | 98.558 |      | M  |      |
| 2  | 29.756 | 800934   | 13708   | 1.442  |      | M  |      |
| 总计 |        | 55524990 | 1133702 |        |      |    |      |

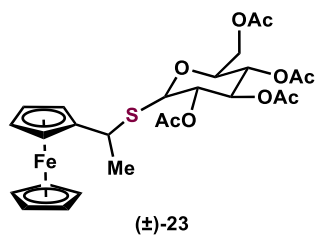

<色谱图>

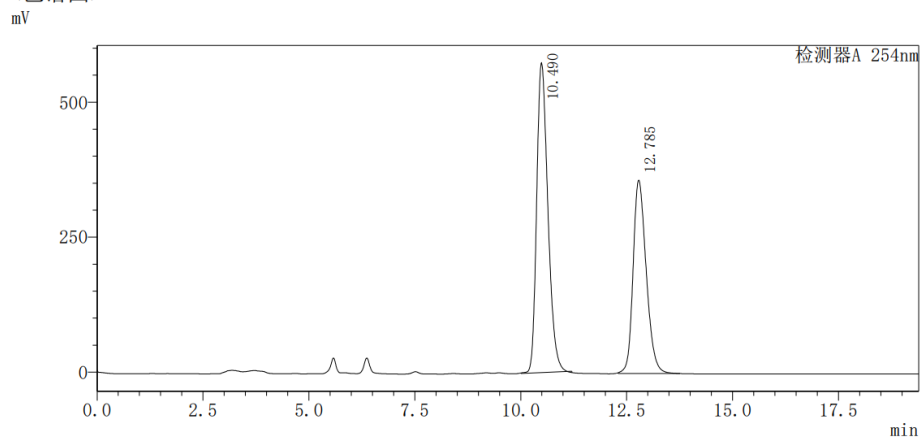

<峰表>

检测器A 254nm

| 峰号 | 保留时间   | 面积       | 高度     | 浓度     | 浓度单位 | 标记 | 化合物名 |
|----|--------|----------|--------|--------|------|----|------|
| 1  | 10.490 | 10537270 | 573461 | 57.738 |      | M  |      |
| 2  | 12.785 | 7713032  | 357924 | 42.262 |      | M  |      |
| 总计 |        | 18250302 | 931385 |        |      |    |      |

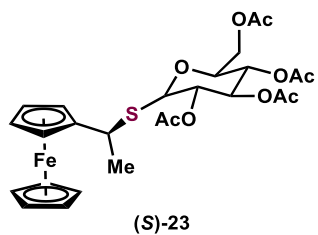

<色谱图>

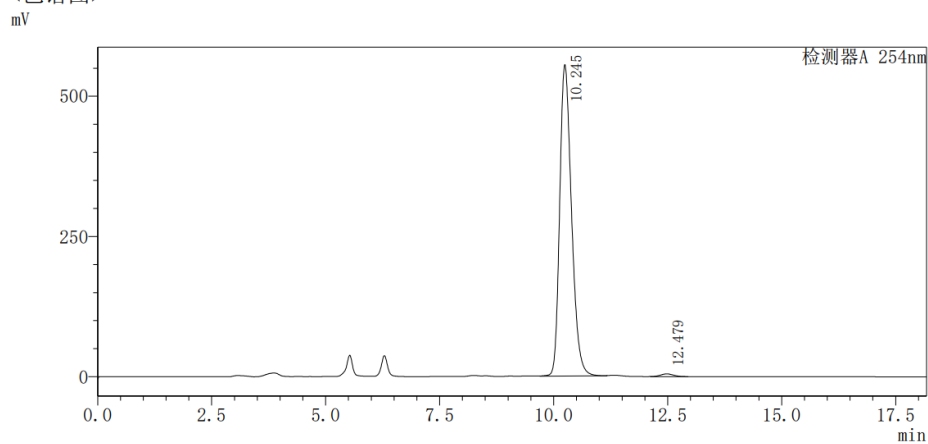

<峰表>

检测器A 254nm

| 峰号 | 保留时间   | 面积       | 高度     | 浓度     | 浓度单位 | 标记 | 化合物名 |
|----|--------|----------|--------|--------|------|----|------|
| 1  | 10.245 | 10012532 | 555183 | 98.926 |      | M  |      |
| 2  | 12.479 | 108715   | 5130   | 1.074  |      | M  |      |
| 总计 |        | 10121247 | 560313 |        |      |    |      |

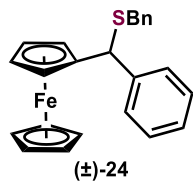

<色谱图>

mV

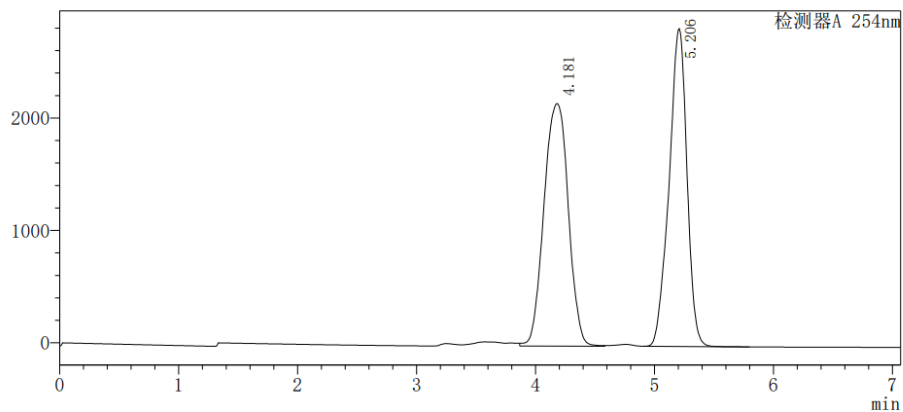

<峰表>

检测器A 254nm

| 峰号 | 保留时间  | 面积       | 高度      | 浓度     | 浓度单位 | 标记 | 化合物名 |
|----|-------|----------|---------|--------|------|----|------|
| 1  | 4.181 | 30764180 | 2157481 | 51.033 |      |    |      |
| 2  | 5.206 | 29519147 | 2827498 | 48.967 |      |    |      |
| 总计 |       | 60283327 | 4984979 |        |      |    |      |

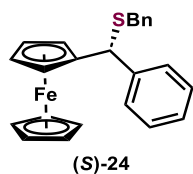

<色谱图>

mV

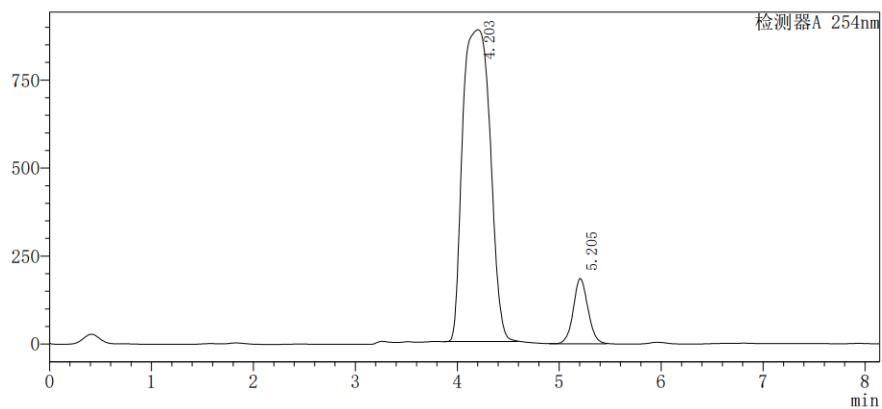

<峰表>

检测器A 254nm

| 峰号 | 保留时间  | 面积       | 高度      | 浓度     | 浓度单位 | 标记 | 化合物名 |
|----|-------|----------|---------|--------|------|----|------|
| 1  | 4.203 | 16643945 | 885648  | 89.964 |      | M  |      |
| 2  | 5.205 | 1856742  | 185276  | 10.036 |      | M  |      |
| 总计 |       | 18500688 | 1070924 |        |      |    |      |

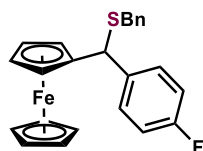

(±)-25

<色谱图>

mV

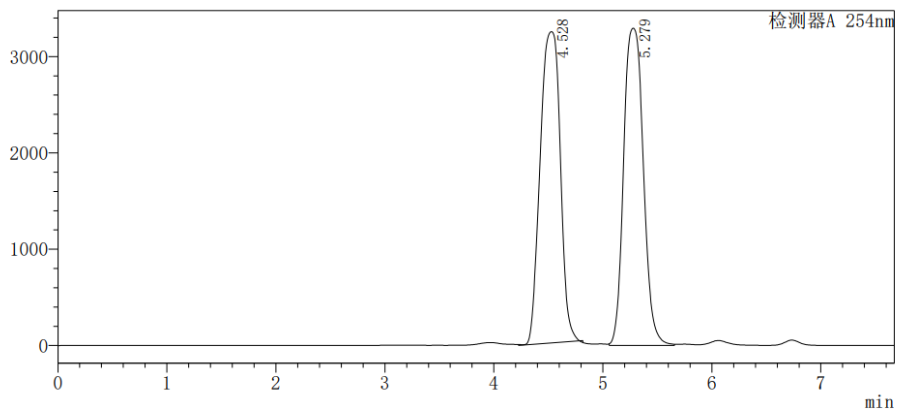

<峰表>

检测器A 254nm

| 峰号 | 保留时间  | 面积       | 高度      | 浓度     | 浓度单位 | 标记 | 化合物名 |
|----|-------|----------|---------|--------|------|----|------|
| 1  | 4.528 | 41421662 | 3231879 | 50.090 |      | M  |      |
| 2  | 5.279 | 41272884 | 3292307 | 49.910 |      | M  |      |
| 总计 |       | 82694546 | 6524185 |        |      |    |      |

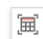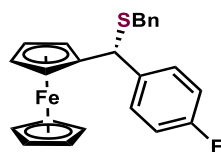

(S)-25

<色谱图>

mV

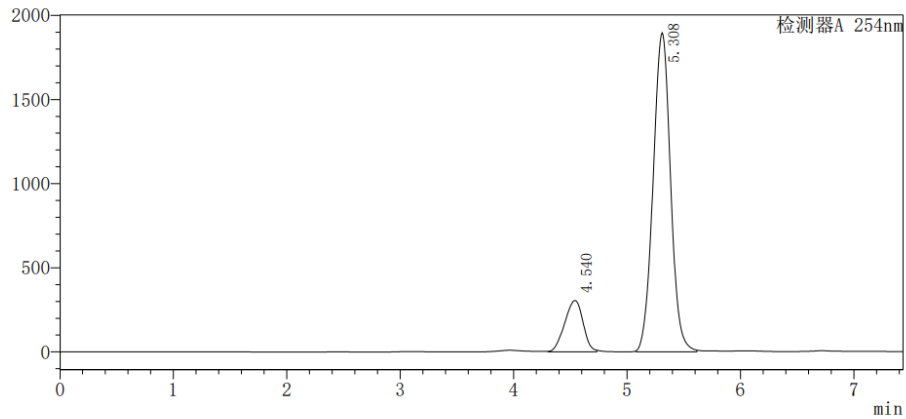

<峰表>

检测器A 254nm

| 峰号 | 保留时间  | 面积       | 高度      | 浓度     | 浓度单位 | 标记 | 化合物名 |
|----|-------|----------|---------|--------|------|----|------|
| 1  | 4.540 | 3424979  | 304600  | 14.471 |      | M  |      |
| 2  | 5.308 | 20243051 | 1895920 | 85.529 |      | M  |      |
| 总计 |       | 23668030 | 2200520 |        |      |    |      |

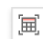

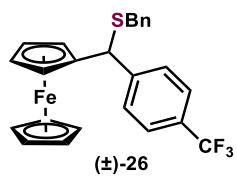

<色谱图>

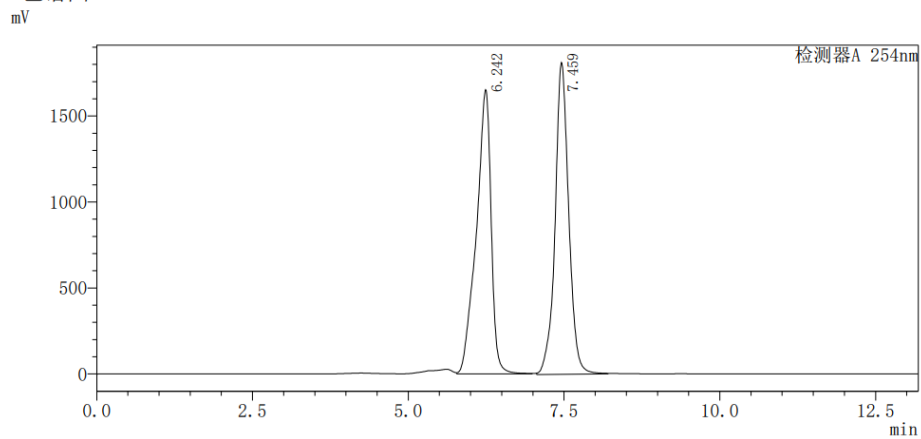

<峰表>

检测器A 254nm

| 峰号 | 保留时间  | 面积       | 高度      | 浓度     | 浓度单位 | 标记 | 化合物名 |
|----|-------|----------|---------|--------|------|----|------|
| 1  | 6.242 | 27474950 | 1653040 | 49.873 |      |    |      |
| 2  | 7.459 | 27614889 | 1812620 | 50.127 |      | M  |      |
| 总计 |       | 55089839 | 3465659 |        |      |    |      |

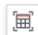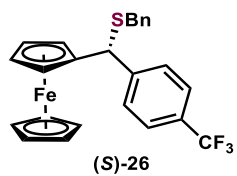

<色谱图>

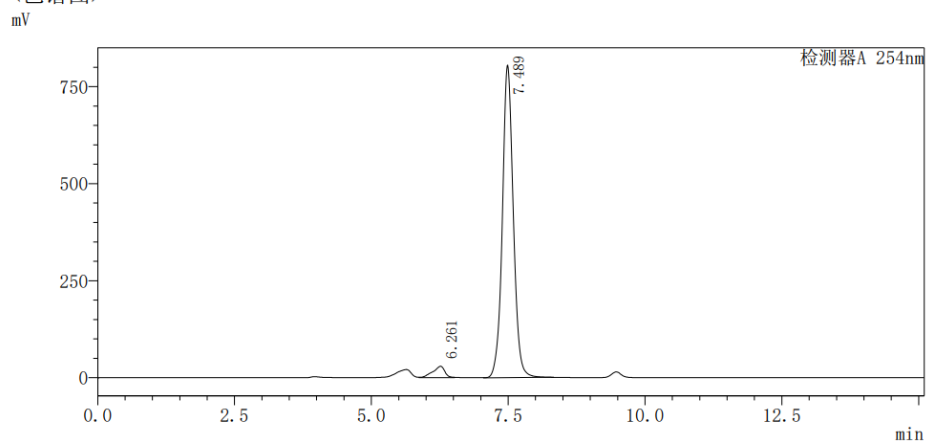

<峰表>

检测器A 254nm

| 峰号 | 保留时间  | 面积       | 高度     | 浓度     | 浓度单位 | 标记 | 化合物名 |
|----|-------|----------|--------|--------|------|----|------|
| 1  | 6.261 | 450697   | 29501  | 3.895  |      | M  |      |
| 2  | 7.489 | 11119102 | 804899 | 96.105 |      | M  |      |
| 总计 |       | 11569800 | 834400 |        |      |    |      |

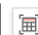

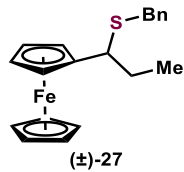

<色谱图>

mV

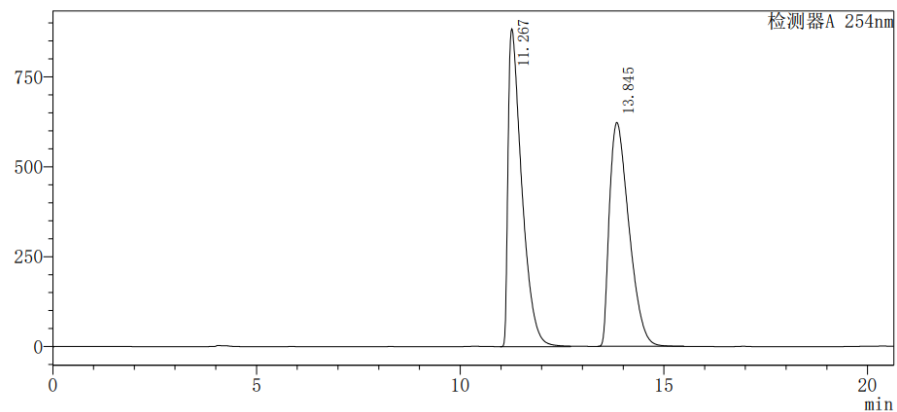

<峰表>

检测器A 254nm

| 峰号 | 保留时间   | 面积       | 高度      | 浓度     | 浓度单位 | 标记 | 化合物名 |
|----|--------|----------|---------|--------|------|----|------|
| 1  | 11.267 | 20772437 | 884218  | 50.099 |      | M  |      |
| 2  | 13.845 | 20690550 | 622364  | 49.901 |      | M  |      |
| 总计 |        | 41462987 | 1506582 |        |      |    |      |

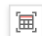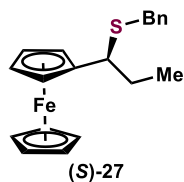

<色谱图>

mV

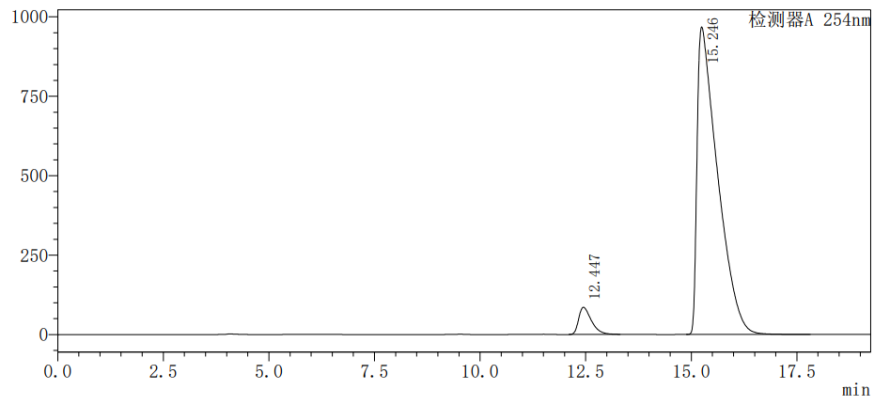

<峰表>

检测器A 254nm

| 峰号 | 保留时间   | 面积       | 高度      | 浓度     | 浓度单位 | 标记 | 化合物名 |
|----|--------|----------|---------|--------|------|----|------|
| 1  | 12.447 | 1796798  | 85532   | 5.215  |      | M  |      |
| 2  | 15.246 | 32655859 | 967813  | 94.785 |      |    |      |
| 总计 |        | 34452658 | 1053345 |        |      |    |      |

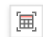

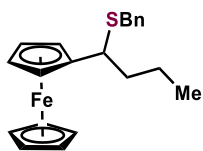

(±)-28

<色谱图>

mV

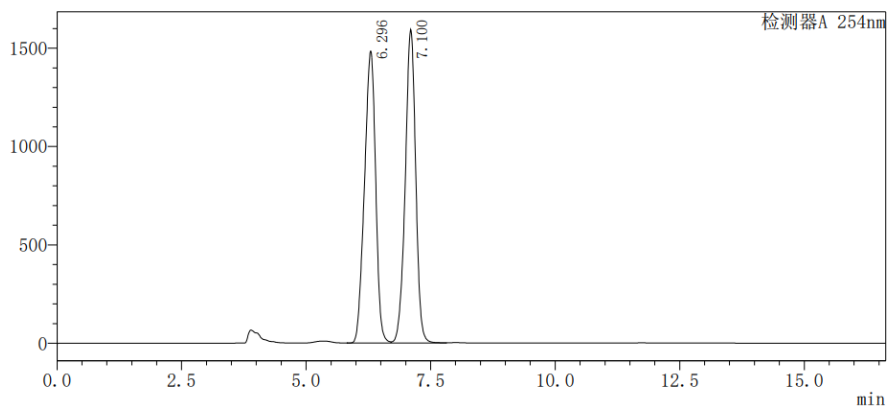

<峰表>

检测器A 254nm

| 峰号 | 保留时间  | 面积       | 高度      | 浓度     | 浓度单位 | 标记  | 化合物名 |
|----|-------|----------|---------|--------|------|-----|------|
| 1  | 6.296 | 23207186 | 1484515 | 49.903 |      |     |      |
| 2  | 7.100 | 23297346 | 1595295 | 50.097 |      | V M |      |
| 总计 |       | 46504532 | 3079811 |        |      |     |      |

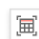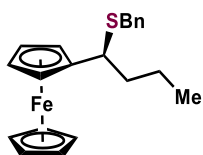

(S)-28

<色谱图>

mV

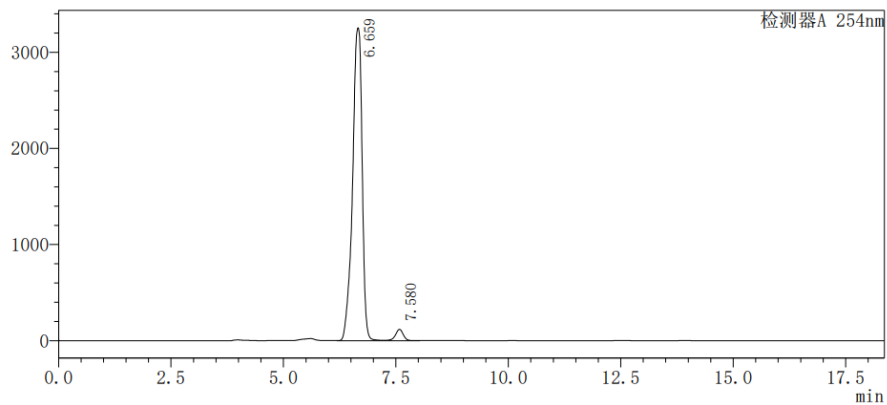

<峰表>

检测器A 254nm

| 峰号 | 保留时间  | 面积       | 高度      | 浓度     | 浓度单位 | 标记 | 化合物名 |
|----|-------|----------|---------|--------|------|----|------|
| 1  | 6.659 | 48127076 | 3254206 | 97.110 |      |    |      |
| 2  | 7.580 | 1432244  | 118331  | 2.890  |      | V  |      |
| 总计 |       | 49559319 | 3372537 |        |      |    |      |

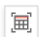

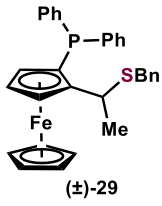

<色谱图>

mV

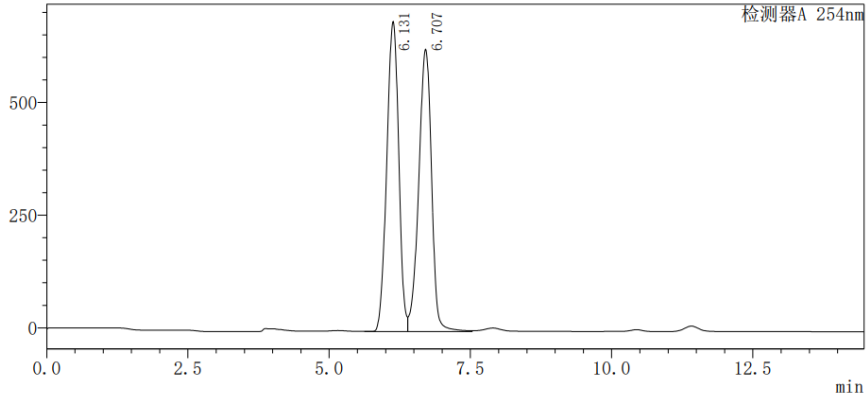

<峰表>

检测器A 254nm

| 峰号 | 保留时间  | 面积       | 高度      | 浓度     | 浓度单位 | 标记 | 化合物名 |
|----|-------|----------|---------|--------|------|----|------|
| 1  | 6.131 | 10159262 | 688088  | 50.523 |      |    |      |
| 2  | 6.707 | 9948891  | 626849  | 49.477 |      | V  |      |
| 总计 |       | 20108153 | 1314937 |        |      |    |      |

画

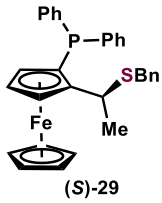

<色谱图>

mV

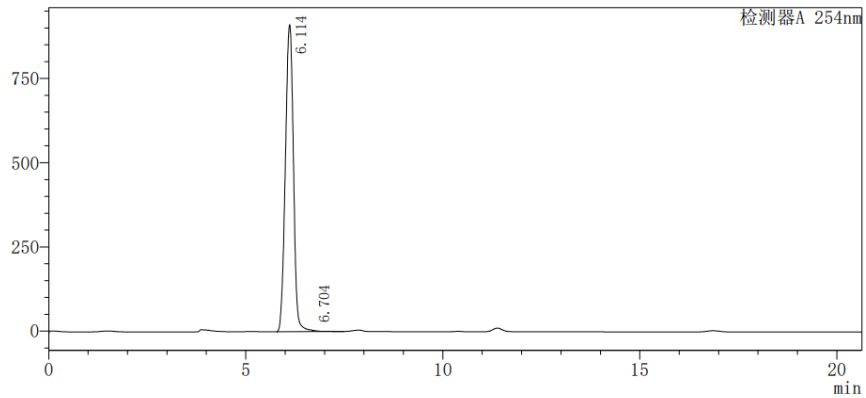

<峰表>

检测器A 254nm

| 峰号 | 保留时间  | 面积       | 高度     | 浓度     | 浓度单位 | 标记  | 化合物名 |
|----|-------|----------|--------|--------|------|-----|------|
| 1  | 6.114 | 12958489 | 910507 | 99.727 |      | M   |      |
| 2  | 6.704 | 35520    | 3885   | 0.273  |      | V M |      |
| 总计 |       | 12994009 | 914393 |        |      |     |      |

画

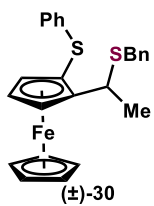

<色谱图>

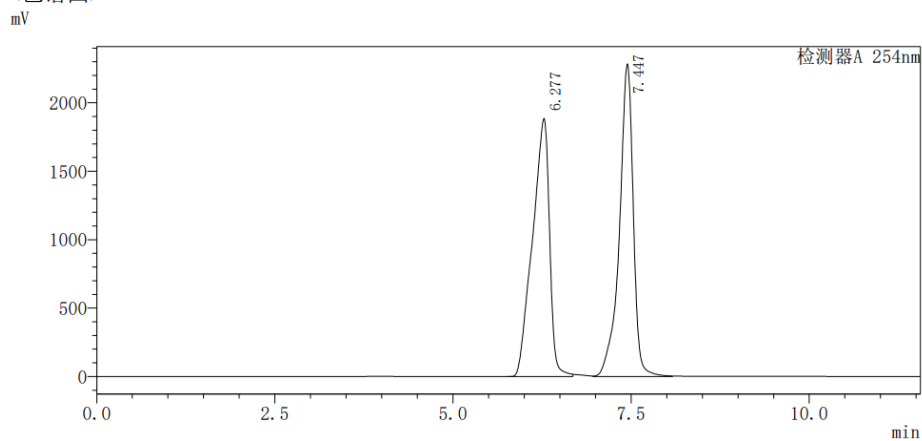

<峰表>

检测器A 254nm

| 峰号 | 保留时间  | 面积       | 高度      | 浓度     | 浓度单位 | 标记 | 化合物名 |
|----|-------|----------|---------|--------|------|----|------|
| 1  | 6.277 | 31287459 | 1884328 | 50.248 |      | M  |      |
| 2  | 7.447 | 30979123 | 2283002 | 49.752 |      | M  |      |
| 总计 |       | 62266582 | 4167330 |        |      |    |      |

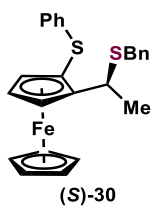

<色谱图>

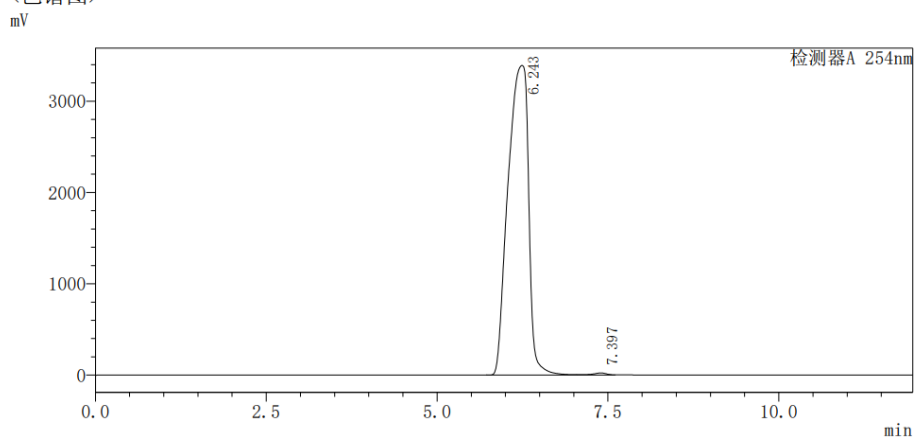

<峰表>

检测器A 254nm

| 峰号 | 保留时间  | 面积       | 高度      | 浓度     | 浓度单位 | 标记  | 化合物名 |
|----|-------|----------|---------|--------|------|-----|------|
| 1  | 6.243 | 71166270 | 3391047 | 99.491 |      |     |      |
| 2  | 7.397 | 364030   | 23566   | 0.509  |      | V M |      |
| 总计 |       | 71530299 | 3414613 |        |      |     |      |

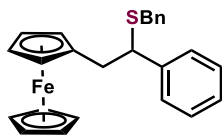

(±)-31

<色谱图>

mV

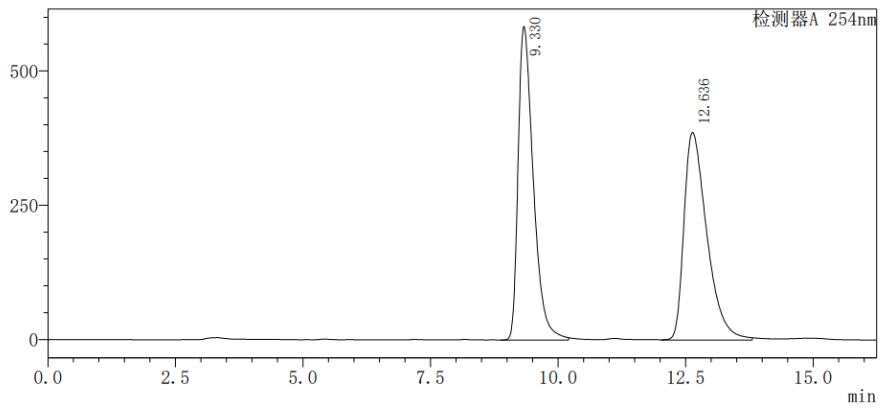

<峰表>

检测器A 254nm

| 峰号 | 保留时间   | 面积       | 高度     | 浓度     | 浓度单位 | 标记 | 化合物名 |
|----|--------|----------|--------|--------|------|----|------|
| 1  | 9.330  | 12118784 | 583518 | 50.080 |      | M  |      |
| 2  | 12.636 | 12080137 | 386661 | 49.920 |      | M  |      |
| 总计 |        | 24198921 | 970180 |        |      |    |      |

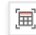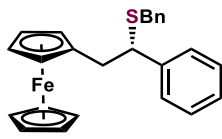

(S)-31

<色谱图>

mV

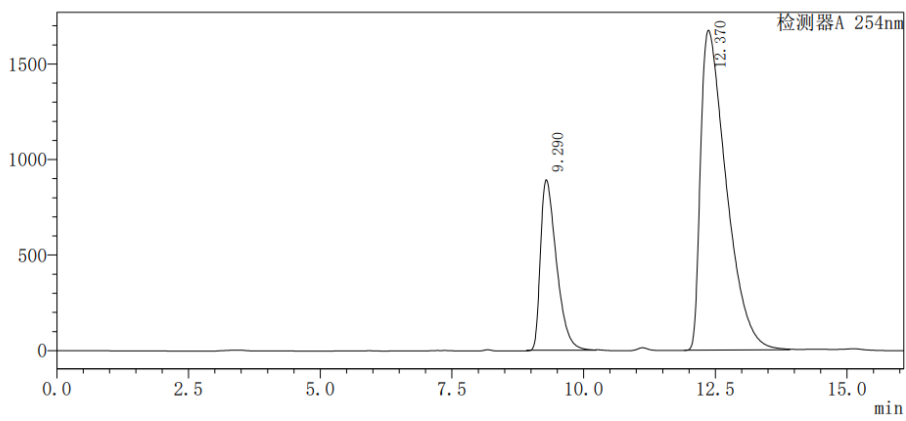

<峰表>

检测器A 254nm

| 峰号 | 保留时间   | 面积       | 高度      | 浓度     | 浓度单位 | 标记 | 化合物名 |
|----|--------|----------|---------|--------|------|----|------|
| 1  | 9.290  | 18801842 | 892711  | 24.828 |      | M  |      |
| 2  | 12.370 | 56925246 | 1673897 | 75.172 |      | M  |      |
| 总计 |        | 75727087 | 2566608 |        |      |    |      |

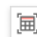

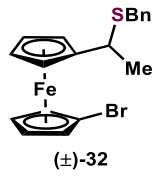

<色谱图>  
mV

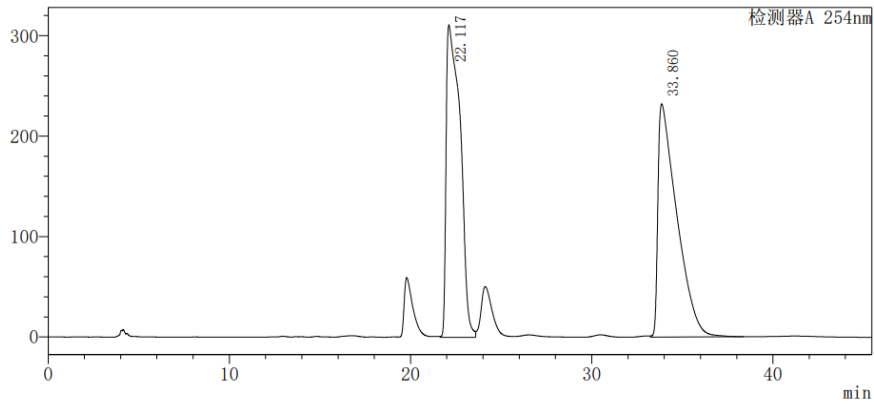

<峰表>

检测器A 254nm

| 峰号 | 保留时间   | 面积       | 高度     | 浓度     | 浓度单位 | 标记 | 化合物名 |
|----|--------|----------|--------|--------|------|----|------|
| 1  | 22.117 | 16756436 | 310946 | 49.808 |      |    |      |
| 2  | 33.860 | 16885432 | 232218 | 50.192 |      |    |      |
| 总计 |        | 33641868 | 543164 |        |      |    |      |

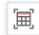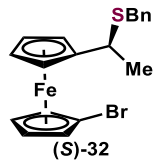

<色谱图>  
mV

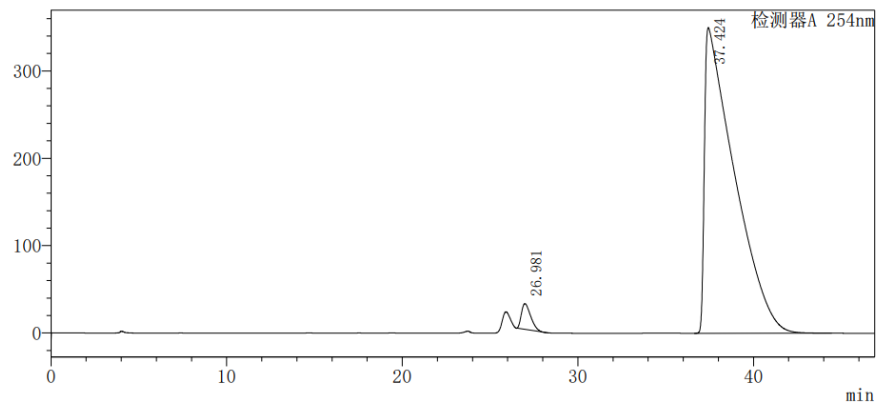

<峰表>

检测器A 254nm

| 峰号 | 保留时间   | 面积       | 高度     | 浓度     | 浓度单位 | 标记 | 化合物名 |
|----|--------|----------|--------|--------|------|----|------|
| 1  | 26.981 | 1072212  | 29389  | 2.524  |      | M  |      |
| 2  | 37.424 | 41407532 | 349919 | 97.476 |      |    |      |
| 总计 |        | 42479743 | 379309 |        |      |    |      |

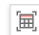

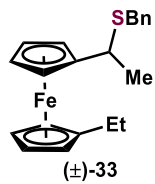

<色谱图>

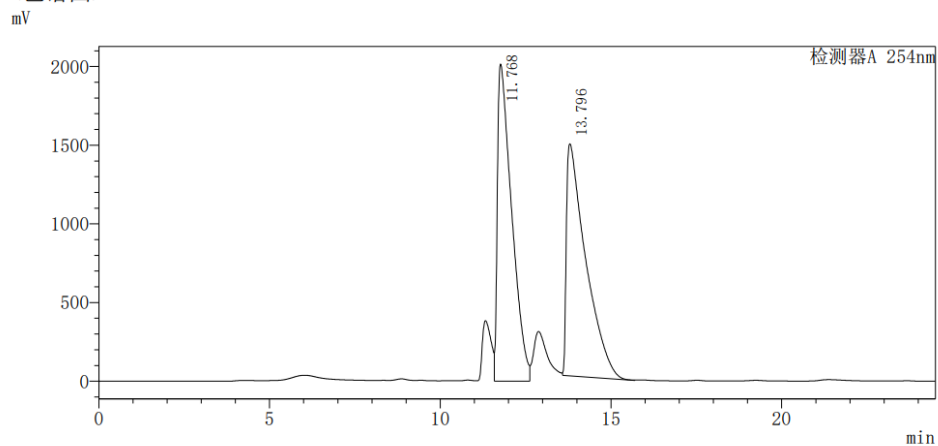

<峰表>

检测器A 254nm

| 峰号 | 保留时间   | 面积        | 高度      | 浓度     | 浓度单位 | 标记 | 化合物名 |
|----|--------|-----------|---------|--------|------|----|------|
| 1  | 11.768 | 58644465  | 2014506 | 50.133 |      |    |      |
| 2  | 13.796 | 58332971  | 1476034 | 49.867 |      | M  |      |
| 总计 |        | 116977436 | 3490540 |        |      |    |      |

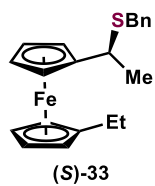

<色谱图>

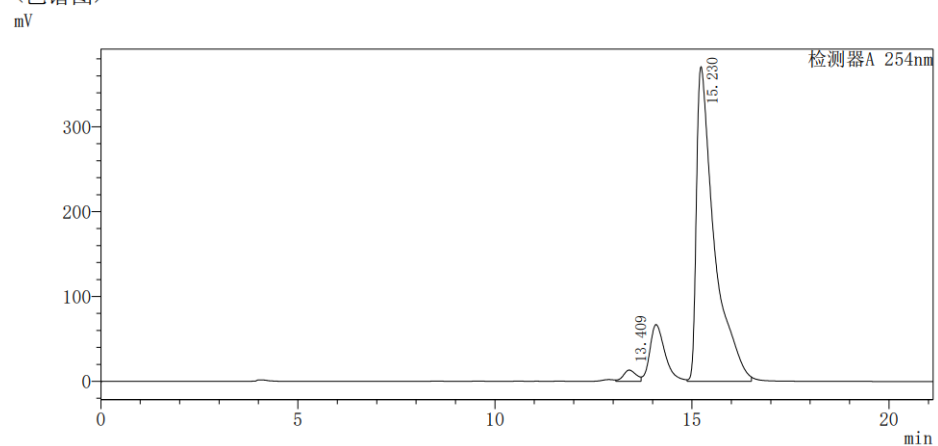

<峰表>

检测器A 254nm

| 峰号 | 保留时间   | 面积       | 高度     | 浓度     | 浓度单位 | 标记 | 化合物名 |
|----|--------|----------|--------|--------|------|----|------|
| 1  | 13.409 | 297589   | 13220  | 2.489  |      |    |      |
| 2  | 15.230 | 11657926 | 370725 | 97.511 |      | M  |      |
| 总计 |        | 11955515 | 383945 |        |      |    |      |

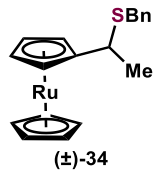

<色谱图>  
mV

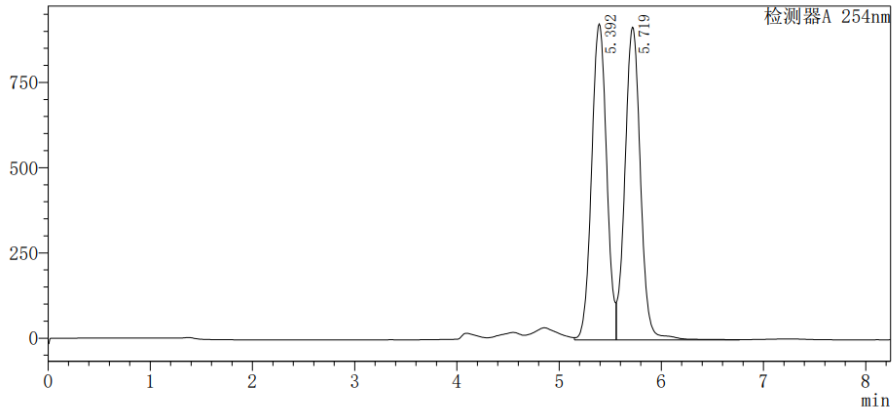

<峰表>

检测器A 254nm

| 峰号 | 保留时间  | 面积       | 高度      | 浓度     | 浓度单位 | 标记 | 化合物名 |
|----|-------|----------|---------|--------|------|----|------|
| 1  | 5.392 | 9472950  | 926309  | 49.491 |      |    |      |
| 2  | 5.719 | 9667874  | 917067  | 50.509 |      | V  |      |
| 总计 |       | 19140824 | 1843376 |        |      |    |      |

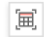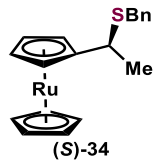

<巴谱图>  
mV

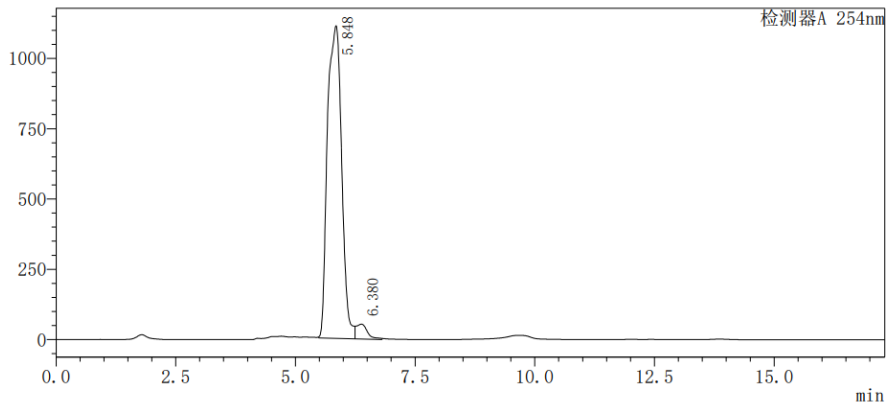

<峰表>

检测器A 254nm

| 峰号 | 保留时间  | 面积       | 高度      | 浓度     | 浓度单位 | 标记  | 化合物名 |
|----|-------|----------|---------|--------|------|-----|------|
| 1  | 5.848 | 22957391 | 1111665 | 96.377 |      | M   |      |
| 2  | 6.380 | 862952   | 52824   | 3.623  |      | V M |      |
| 总计 |       | 23820344 | 1164489 |        |      |     |      |

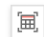

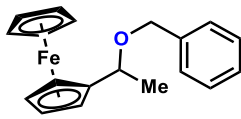

(±)-35

<色谱图>

mV

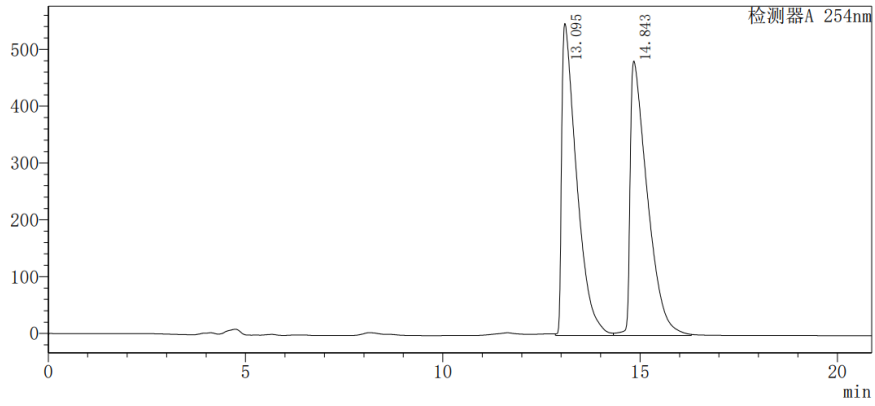

<峰表>

检测器A 254nm

| 峰号 | 保留时间   | 面积       | 高度      | 浓度     | 浓度单位 | 标记  | 化合物名 |
|----|--------|----------|---------|--------|------|-----|------|
| 1  | 13.095 | 14533212 | 548903  | 49.700 |      |     |      |
| 2  | 14.843 | 14708637 | 483072  | 50.300 |      | V M |      |
| 总计 |        | 29241849 | 1031975 |        |      |     |      |

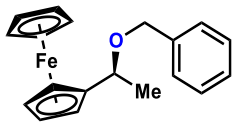

(S)-35

<色谱图>

mV

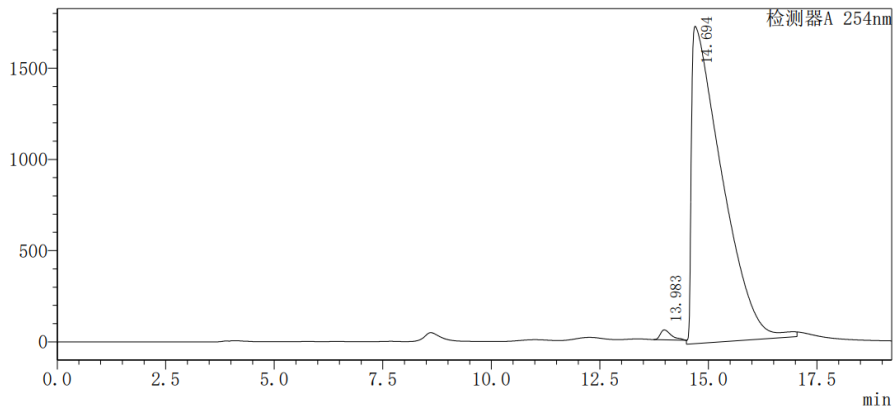

<峰表>

检测器A 254nm

| 峰号 | 保留时间   | 面积       | 高度      | 浓度     | 浓度单位 | 标记 | 化合物名 |
|----|--------|----------|---------|--------|------|----|------|
| 1  | 13.983 | 944299   | 53909   | 1.098  |      | M  |      |
| 2  | 14.694 | 85065396 | 1739460 | 98.902 |      | M  |      |
| 总计 |        | 86009695 | 1793368 |        |      |    |      |

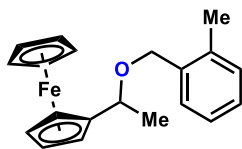

(±)-36

<色谱图>

mV

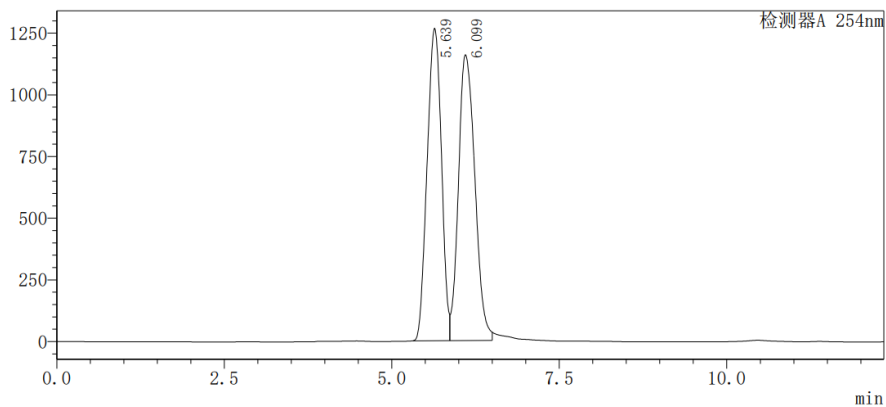

<峰表>

检测器A 254nm

| 峰号 | 保留时间  | 面积       | 高度      | 浓度     | 浓度单位 | 标记  | 化合物名 |
|----|-------|----------|---------|--------|------|-----|------|
| 1  | 5.639 | 18831621 | 1266141 | 48.759 |      | M   |      |
| 2  | 6.099 | 19790271 | 1158614 | 51.241 |      | V M |      |
| 总计 |       | 38621892 | 2424756 |        |      |     |      |

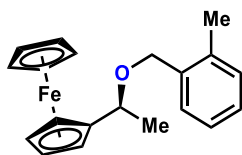

(S)-36

<色谱图>

mV

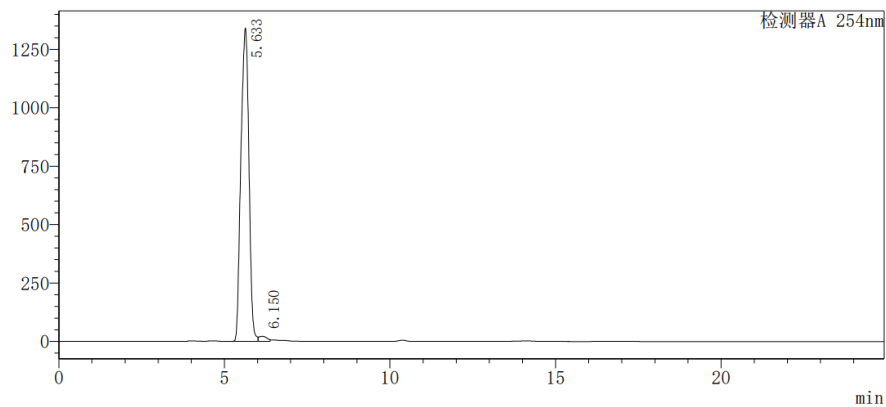

<峰表>

检测器A 254nm

| 峰号 | 保留时间  | 面积       | 高度      | 浓度     | 浓度单位 | 标记  | 化合物名 |
|----|-------|----------|---------|--------|------|-----|------|
| 1  | 5.633 | 22534084 | 1339307 | 98.372 |      |     |      |
| 2  | 6.150 | 373029   | 21715   | 1.628  |      | V M |      |
| 总计 |       | 22907112 | 1361022 |        |      |     |      |

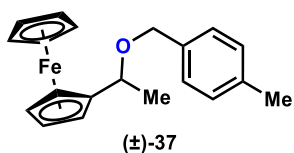

<色谱图>

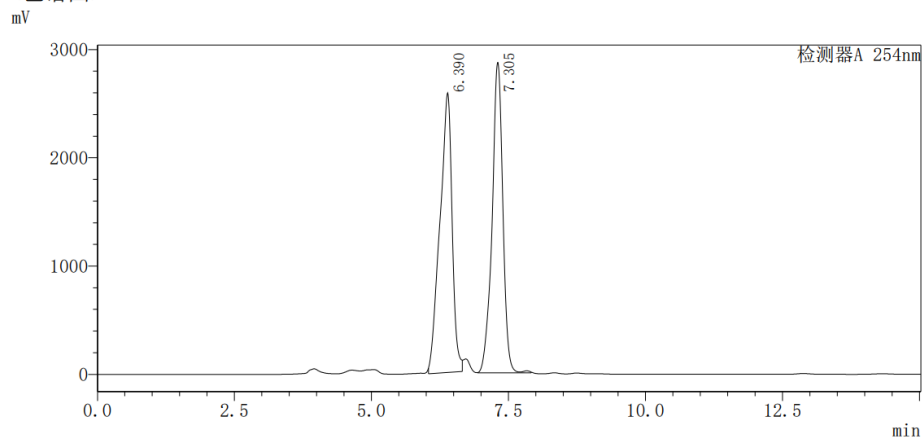

<峰表>

检测器A 254nm

| 峰号 | 保留时间  | 面积       | 高度      | 浓度     | 浓度单位 | 标记 | 化合物名 |
|----|-------|----------|---------|--------|------|----|------|
| 1  | 6.390 | 40077575 | 2582740 | 50.632 |      | M  |      |
| 2  | 7.305 | 39077026 | 2865613 | 49.368 |      | M  |      |
| 总计 |       | 79154601 | 5448353 |        |      |    |      |

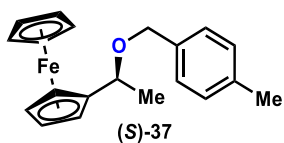

<色谱图>

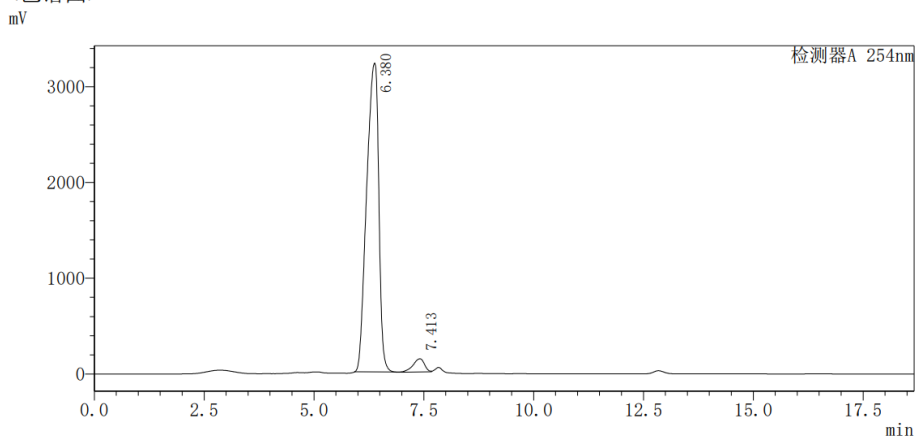

<峰表>

检测器A 254nm

| 峰号 | 保留时间  | 面积       | 高度      | 浓度     | 浓度单位 | 标记 | 化合物名 |
|----|-------|----------|---------|--------|------|----|------|
| 1  | 6.380 | 61772540 | 3226121 | 96.069 |      | M  |      |
| 2  | 7.413 | 2527591  | 137260  | 3.931  |      | M  |      |
| 总计 |       | 64300132 | 3363380 |        |      |    |      |

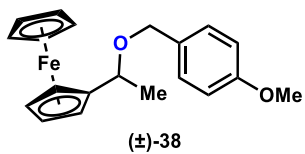

<色谱图>  
mV

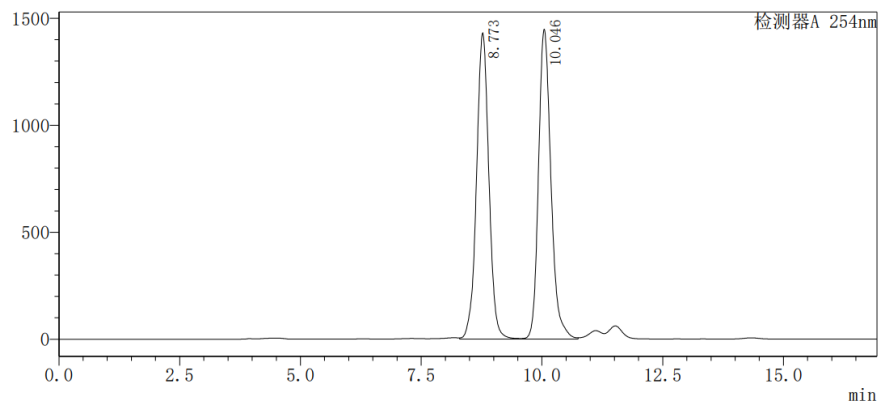

<峰表>

检测器A 254nm

| 峰号 | 保留时间   | 面积       | 高度      | 浓度     | 浓度单位 | 标记 | 化合物名 |
|----|--------|----------|---------|--------|------|----|------|
| 1  | 8.773  | 25481240 | 1431622 | 49.549 |      |    |      |
| 2  | 10.046 | 25945303 | 1448245 | 50.451 |      | V  |      |
| 总计 |        | 51426544 | 2879868 |        |      |    |      |

画

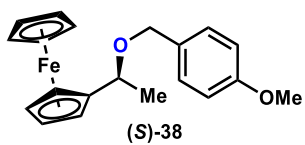

<色谱图>  
mV

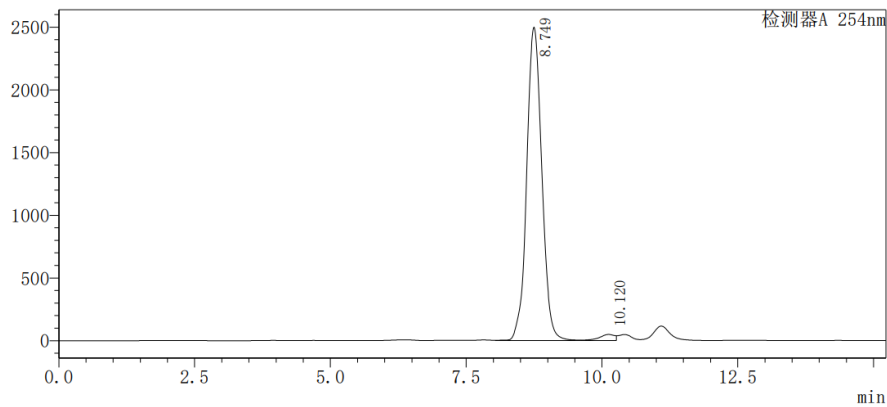

<峰表>

检测器A 254nm

| 峰号 | 保留时间   | 面积       | 高度      | 浓度     | 浓度单位 | 标记 | 化合物名 |
|----|--------|----------|---------|--------|------|----|------|
| 1  | 8.749  | 48487121 | 2498843 | 97.967 |      |    |      |
| 2  | 10.120 | 1006433  | 49629   | 2.033  |      | V  |      |
| 总计 |        | 49493554 | 2548472 |        |      |    |      |

画

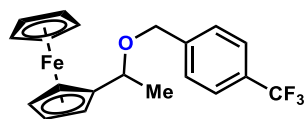

(±)-39

<色谱图>

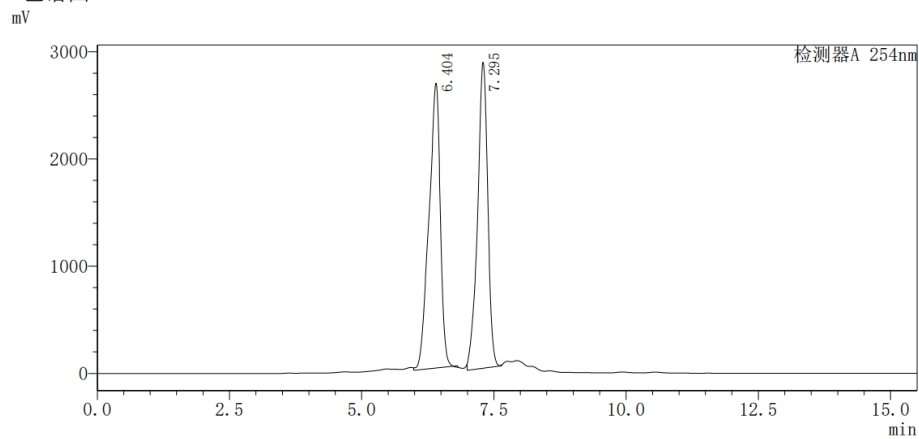

<峰表>

检测器A 254nm

| 峰号 | 保留时间  | 面积       | 高度      | 浓度     | 浓度单位 | 标记 | 化合物名 |
|----|-------|----------|---------|--------|------|----|------|
| 1  | 6.404 | 39620246 | 2656722 | 50.841 |      | M  |      |
| 2  | 7.295 | 38310128 | 2853571 | 49.159 |      | M  |      |
| 总计 |       | 77930374 | 5510293 |        |      |    |      |

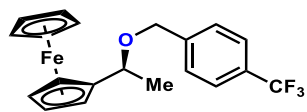

(S)-39

<色谱图>

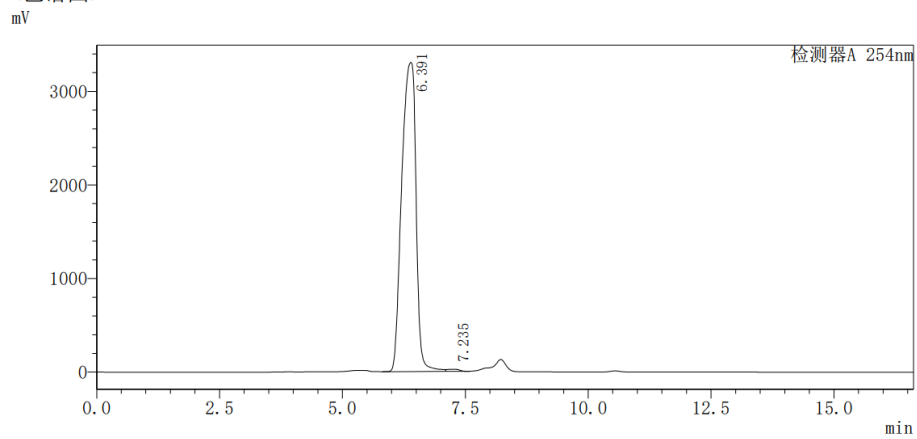

<峰表>

检测器A 254nm

| 峰号 | 保留时间  | 面积       | 高度      | 浓度     | 浓度单位 | 标记  | 化合物名 |
|----|-------|----------|---------|--------|------|-----|------|
| 1  | 6.391 | 66850558 | 3303085 | 99.418 |      | M   |      |
| 2  | 7.235 | 391421   | 23124   | 0.582  |      | V M |      |
| 总计 |       | 67241978 | 3326209 |        |      |     |      |

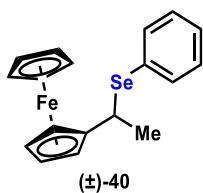

<色谱图>

mV

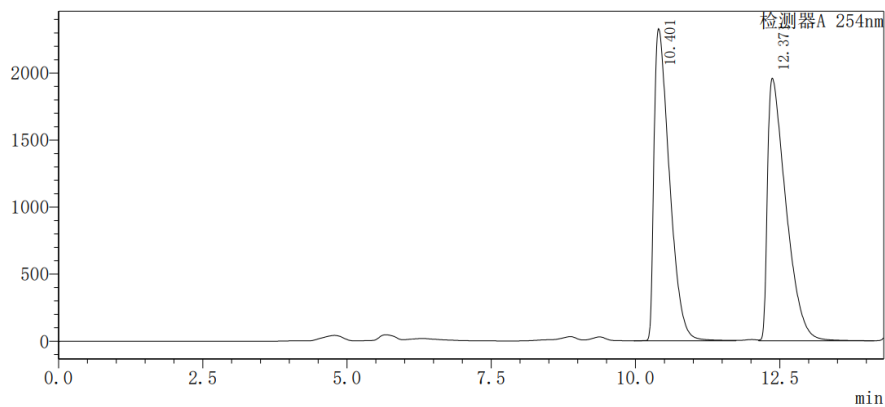

<峰表>

检测器A 254nm

| 峰号 | 保留时间   | 面积       | 高度      | 浓度     | 浓度单位 | 标记 | 化合物名 |
|----|--------|----------|---------|--------|------|----|------|
| 1  | 10.401 | 43526824 | 2329591 | 49.913 |      | M  |      |
| 2  | 12.371 | 43678889 | 1959159 | 50.087 |      |    |      |
| 总计 |        | 87205713 | 4288749 |        |      |    |      |

画

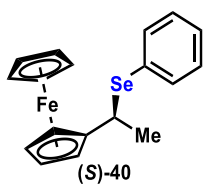

<色谱图>

mV

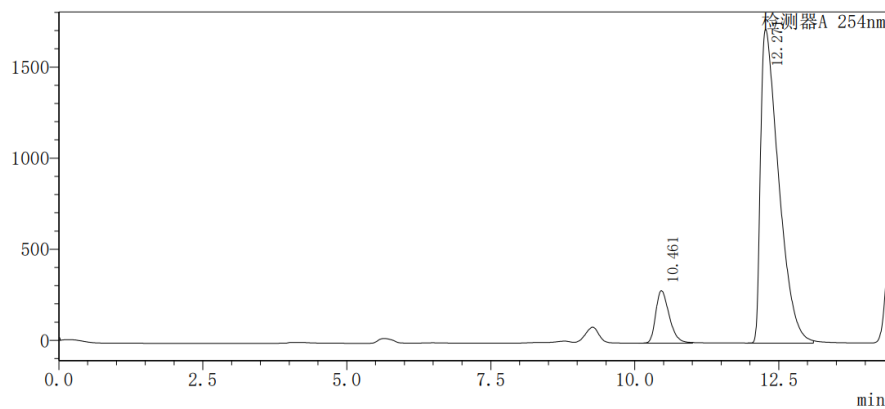

<峰表>

检测器A 254nm

| 峰号 | 保留时间   | 面积       | 高度      | 浓度     | 浓度单位 | 标记 | 化合物名 |
|----|--------|----------|---------|--------|------|----|------|
| 1  | 10.461 | 4705751  | 288099  | 11.075 |      | M  |      |
| 2  | 12.271 | 37785299 | 1721048 | 88.925 |      | M  |      |
| 总计 |        | 42491050 | 2009148 |        |      |    |      |

画

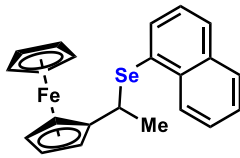

(±)-41

<色谱图>

mV

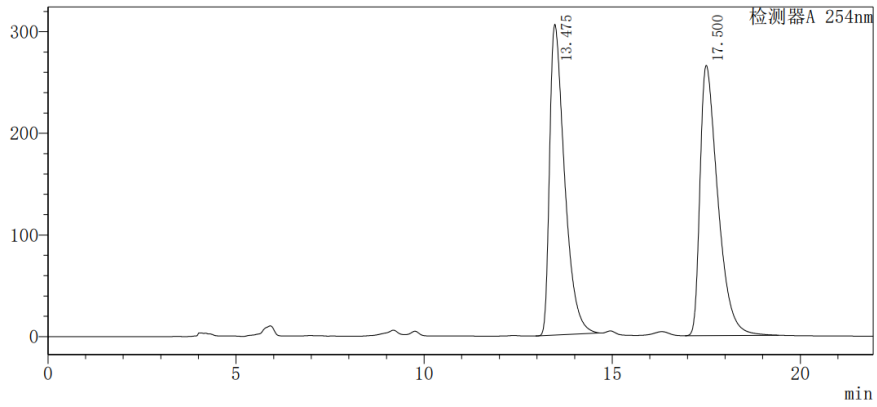

<峰表>

检测器A 254nm

| 峰号 | 保留时间   | 面积       | 高度     | 浓度     | 浓度单位 | 标记 | 化合物名 |
|----|--------|----------|--------|--------|------|----|------|
| 1  | 13.475 | 8461010  | 305592 | 49.163 |      | M  |      |
| 2  | 17.500 | 8749201  | 265858 | 50.837 |      | M  |      |
| 总计 |        | 17210211 | 571450 |        |      |    |      |

画

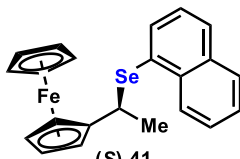

(S)-41

<色谱图>

mV

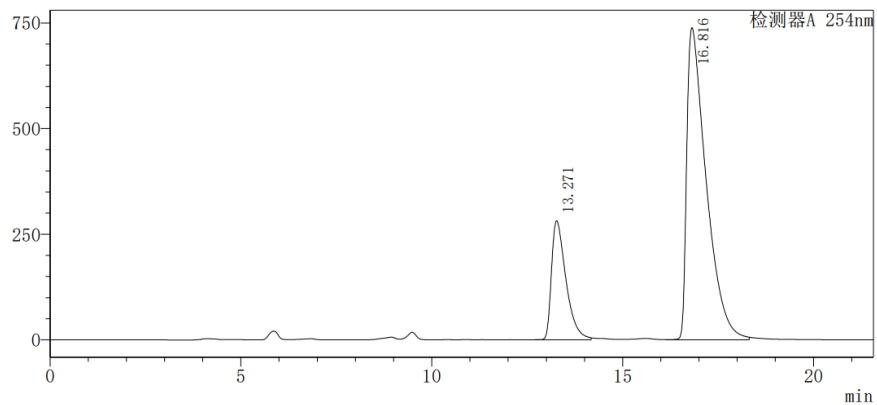

<峰表>

检测器A 254nm

| 峰号 | 保留时间   | 面积       | 高度      | 浓度     | 浓度单位 | 标记 | 化合物名 |
|----|--------|----------|---------|--------|------|----|------|
| 1  | 13.271 | 7442374  | 281835  | 22.120 |      | M  |      |
| 2  | 16.816 | 26202554 | 738570  | 77.880 |      | M  |      |
| 总计 |        | 33644928 | 1020405 |        |      |    |      |

画

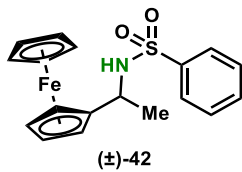

<色谱图>

mV

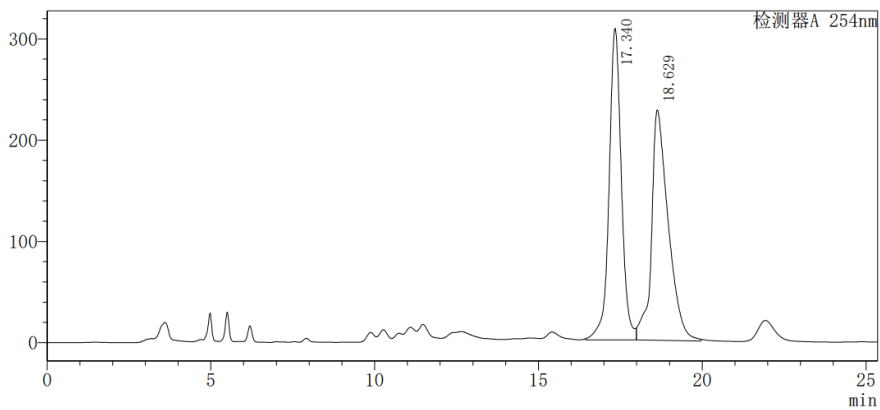

<峰表>

检测器A 254nm

| 峰号 | 保留时间   | 面积       | 高度     | 浓度     | 浓度单位 | 标记 | 化合物名 |
|----|--------|----------|--------|--------|------|----|------|
| 1  | 17.340 | 8015044  | 307672 | 49.673 |      | M  |      |
| 2  | 18.629 | 8120688  | 227552 | 50.327 |      | M  |      |
| 总计 |        | 16135731 | 535224 |        |      |    |      |

画

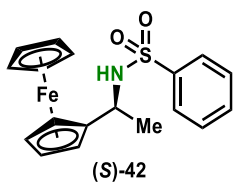

<色谱图>

mV

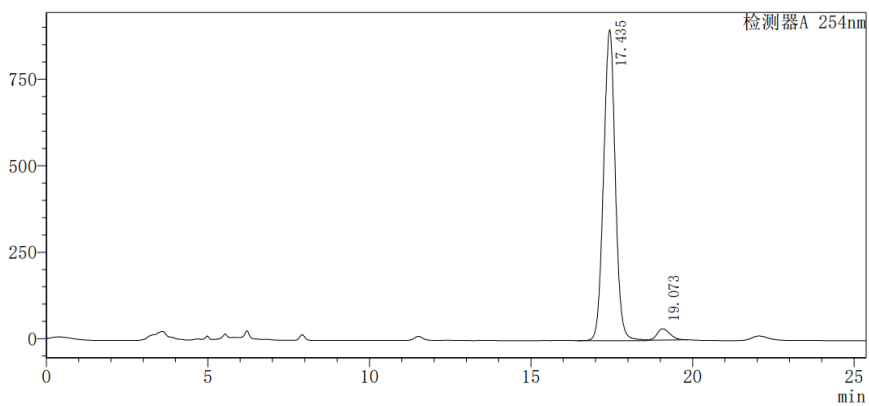

<峰表>

检测器A 254nm

| 峰号 | 保留时间   | 面积       | 高度     | 浓度     | 浓度单位 | 标记 | 化合物名 |
|----|--------|----------|--------|--------|------|----|------|
| 1  | 17.435 | 22607318 | 898389 | 96.109 |      |    |      |
| 2  | 19.073 | 915370   | 32893  | 3.891  |      | M  |      |
| 总计 |        | 23522688 | 931282 |        |      |    |      |

画

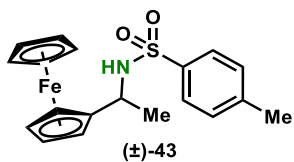

<色谱图>  
mV

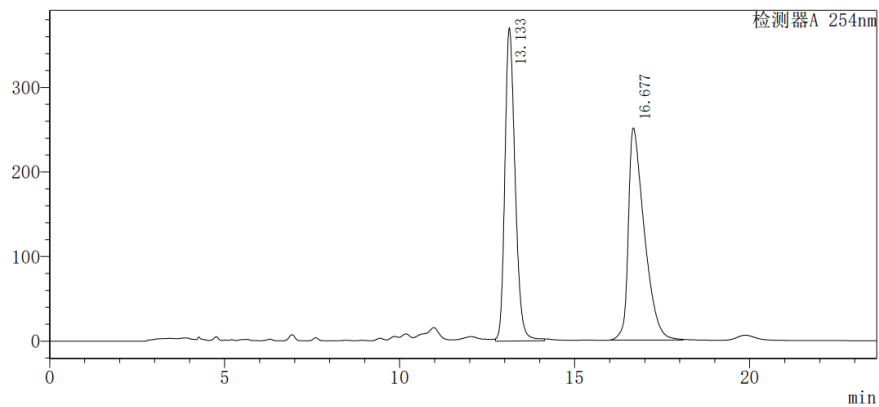

<峰表>

| 峰号 | 保留时间   | 面积       | 高度     | 浓度     | 浓度单位 | 标记 | 化合物名 |
|----|--------|----------|--------|--------|------|----|------|
| 1  | 13.133 | 7551633  | 370404 | 48.741 |      | M  |      |
| 2  | 16.677 | 7941891  | 250940 | 51.259 |      | M  |      |
| 总计 |        | 15493525 | 621344 |        |      |    |      |

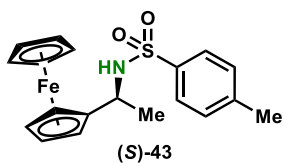

<色谱图>  
mV

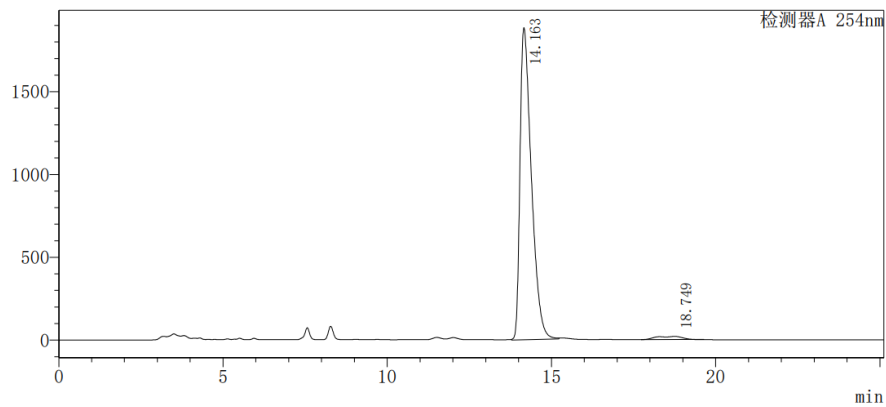

<峰表>

| 峰号 | 保留时间   | 面积       | 高度      | 浓度     | 浓度单位 | 标记 | 化合物名 |
|----|--------|----------|---------|--------|------|----|------|
| 1  | 14.163 | 45370002 | 1883144 | 97.782 |      | M  |      |
| 2  | 18.749 | 1029075  | 19154   | 2.218  |      | M  |      |
| 总计 |        | 46399078 | 1902298 |        |      |    |      |

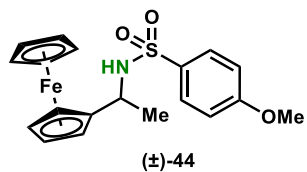

<色谱图>

mV

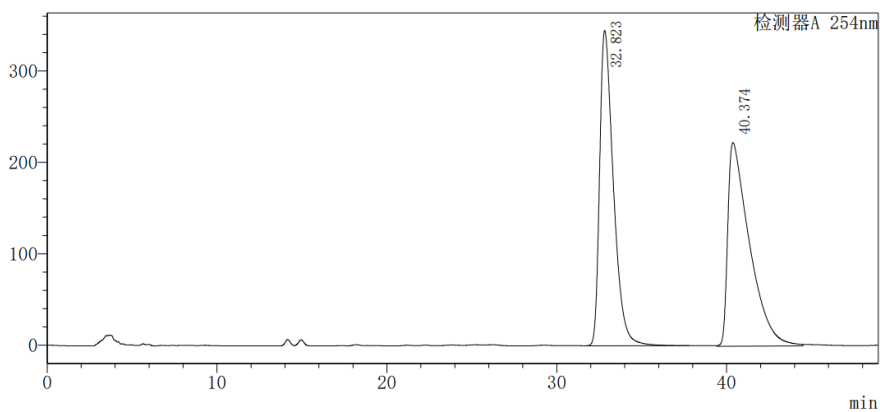

<峰表>

检测器A 254nm

| 峰号 | 保留时间   | 面积       | 高度     | 浓度     | 浓度单位 | 标记 | 化合物名 |
|----|--------|----------|--------|--------|------|----|------|
| 1  | 32.823 | 19456164 | 344858 | 49.553 |      |    |      |
| 2  | 40.374 | 19807072 | 222885 | 50.447 |      | M  |      |
| 总计 |        | 39263236 | 567743 |        |      |    |      |

画

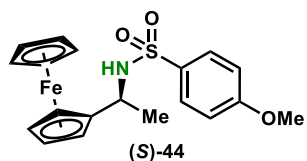

<色谱图>

mV

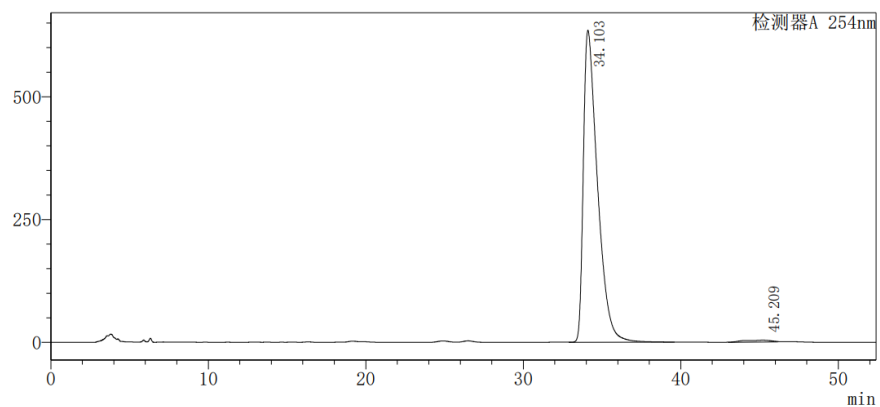

<峰表>

检测器A 254nm

| 峰号 | 保留时间   | 面积       | 高度     | 浓度     | 浓度单位 | 标记 | 化合物名 |
|----|--------|----------|--------|--------|------|----|------|
| 1  | 34.103 | 39632277 | 635317 | 98.762 |      |    |      |
| 2  | 45.209 | 496787   | 3924   | 1.238  |      | M  |      |
| 总计 |        | 40129064 | 639241 |        |      |    |      |

画

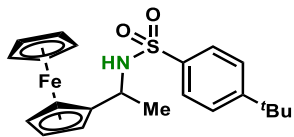

(±)-45

<色谱图>

mV

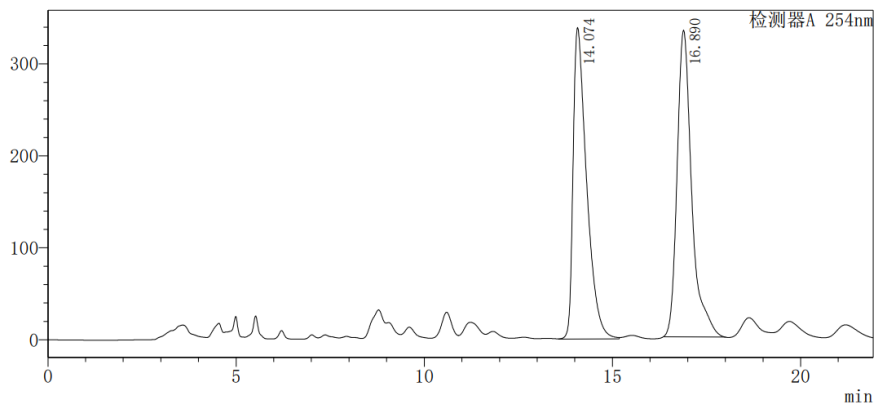

<峰表>

检测器A 254nm

| 峰号 | 保留时间   | 面积       | 高度     | 浓度     | 浓度单位 | 标记 | 化合物名 |
|----|--------|----------|--------|--------|------|----|------|
| 1  | 14.074 | 8449013  | 338514 | 48.403 |      | M  |      |
| 2  | 16.890 | 9006570  | 333503 | 51.597 |      | M  |      |
| 总计 |        | 17455583 | 672017 |        |      |    |      |

画

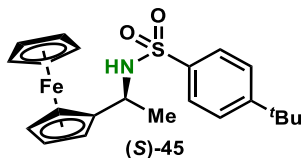

(S)-45

<色谱图>

mV

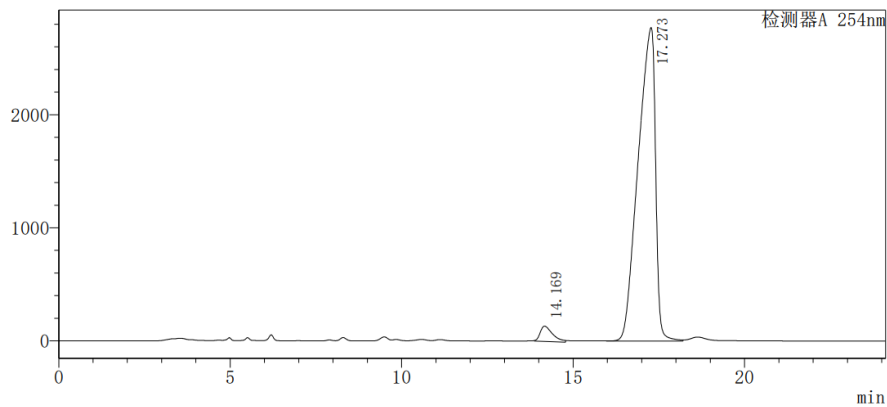

<峰表>

检测器A 254nm

| 峰号 | 保留时间   | 面积        | 高度      | 浓度     | 浓度单位 | 标记 | 化合物名 |
|----|--------|-----------|---------|--------|------|----|------|
| 1  | 14.169 | 3432023   | 135691  | 3.393  |      | M  |      |
| 2  | 17.273 | 97706582  | 2771219 | 96.607 |      |    |      |
| 总计 |        | 101138605 | 2906910 |        |      |    |      |

画

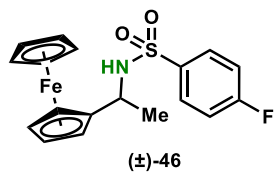

<色谱图>

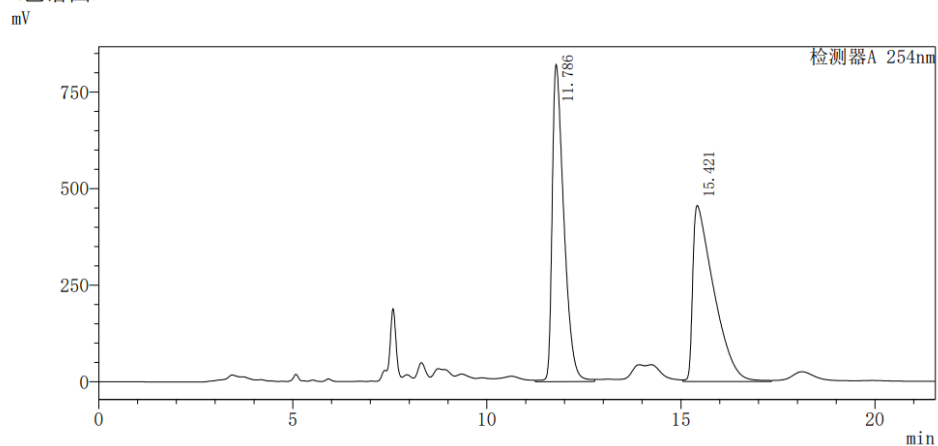

<峰表>

检测器A 254nm

| 峰号 | 保留时间   | 面积       | 高度      | 浓度     | 浓度单位 | 标记 | 化合物名 |
|----|--------|----------|---------|--------|------|----|------|
| 1  | 11.786 | 17199930 | 821117  | 49.980 |      |    |      |
| 2  | 15.421 | 17213547 | 455781  | 50.020 |      |    |      |
| 总计 |        | 34413477 | 1276898 |        |      |    |      |

画

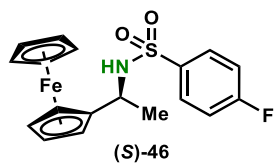

<色谱图>

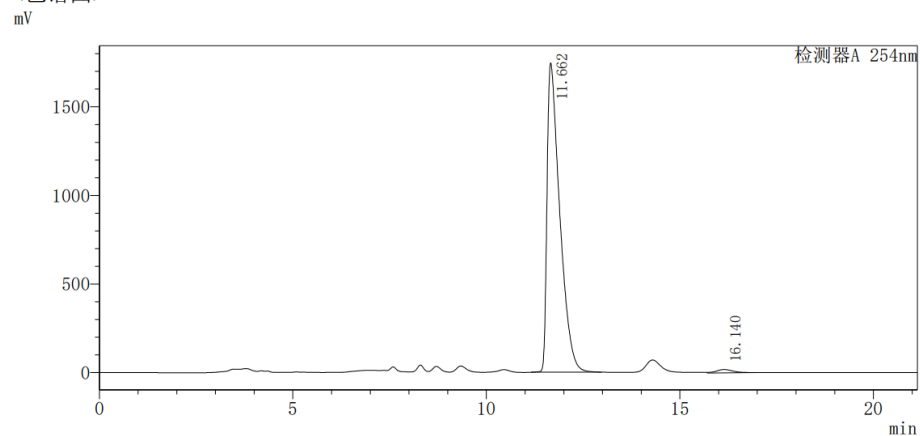

<峰表>

检测器A 254nm

| 峰号 | 保留时间   | 面积       | 高度      | 浓度     | 浓度单位 | 标记 | 化合物名 |
|----|--------|----------|---------|--------|------|----|------|
| 1  | 11.662 | 39857549 | 1744793 | 98.567 |      | M  |      |
| 2  | 16.140 | 579526   | 18978   | 1.433  |      | M  |      |
| 总计 |        | 40437075 | 1763772 |        |      |    |      |

画

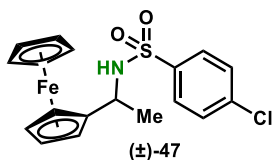

<色谱图>

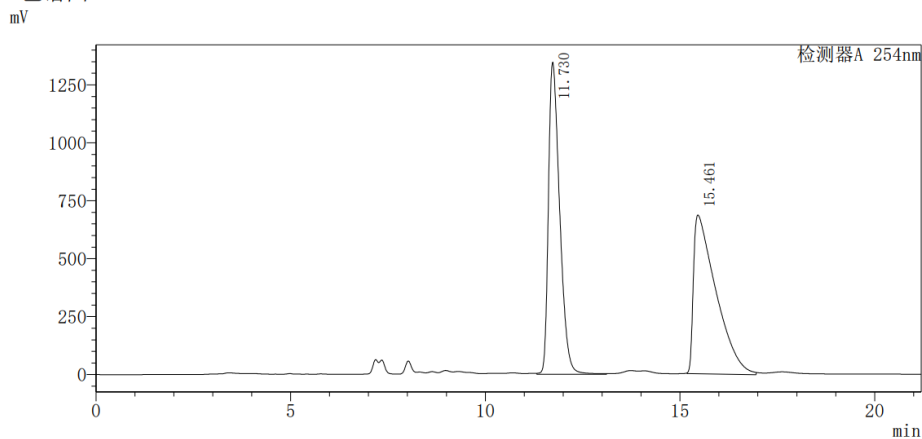

<峰表>

检测器A 254nm

| 峰号 | 保留时间   | 面积       | 高度      | 浓度     | 浓度单位 | 标记 | 化合物名 |
|----|--------|----------|---------|--------|------|----|------|
| 1  | 11.730 | 26992970 | 1345790 | 49.511 |      |    |      |
| 2  | 15.461 | 27526156 | 684813  | 50.489 |      | M  |      |
| 总计 |        | 54519126 | 2030603 |        |      |    |      |

画

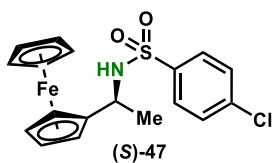

<色谱图>

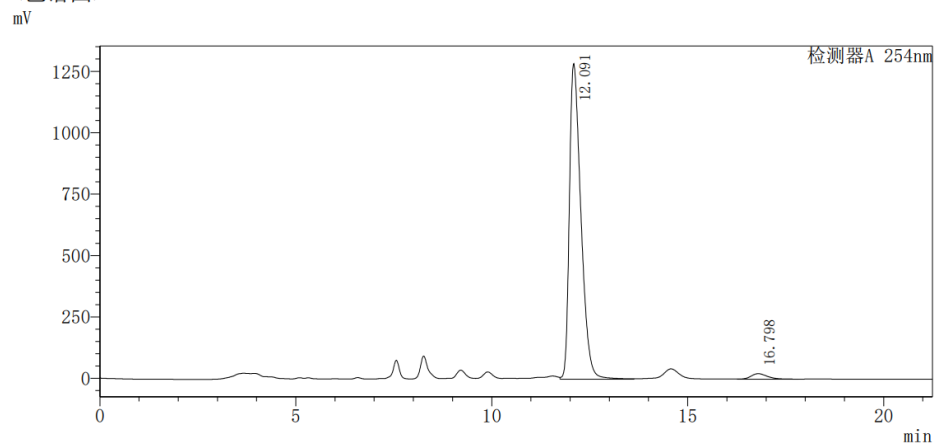

<峰表>

检测器A 254nm

| 峰号 | 保留时间   | 面积       | 高度      | 浓度     | 浓度单位 | 标记 | 化合物名 |
|----|--------|----------|---------|--------|------|----|------|
| 1  | 12.091 | 26284499 | 1284900 | 97.563 |      |    |      |
| 2  | 16.798 | 656650   | 22534   | 2.437  |      |    |      |
| 总计 |        | 26941149 | 1307433 |        |      |    |      |

画

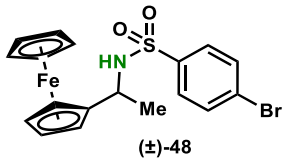

<色谱图>  
mV

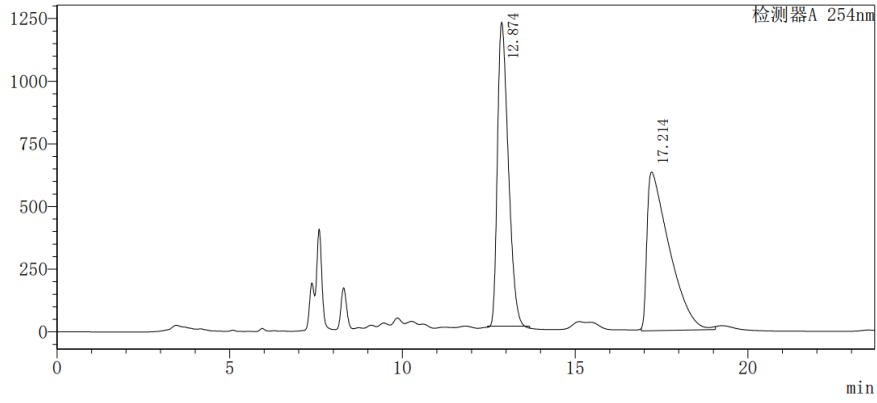

<峰表>

| 峰号 | 保留时间   | 面积       | 高度      | 浓度     | 浓度单位 | 标记 | 化合物名 |
|----|--------|----------|---------|--------|------|----|------|
| 1  | 12.874 | 26448905 | 1211479 | 48.147 |      | M  |      |
| 2  | 17.214 | 28484867 | 632970  | 51.853 |      | M  |      |
| 总计 |        | 54933772 | 1844449 |        |      |    |      |

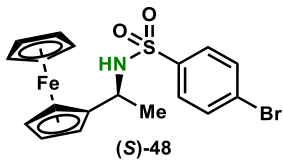

<色谱图>  
mV

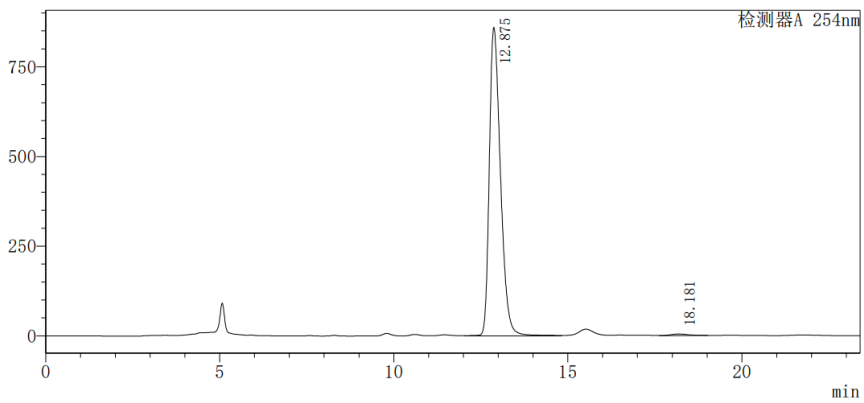

<峰表>

| 峰号 | 保留时间   | 面积       | 高度     | 浓度     | 浓度单位 | 标记 | 化合物名 |
|----|--------|----------|--------|--------|------|----|------|
| 1  | 12.875 | 19210728 | 859873 | 99.188 |      |    |      |
| 2  | 18.181 | 157333   | 4373   | 0.812  |      | M  |      |
| 总计 |        | 19368061 | 864247 |        |      |    |      |

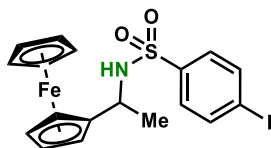

(±)-49

<色谱图>

mV

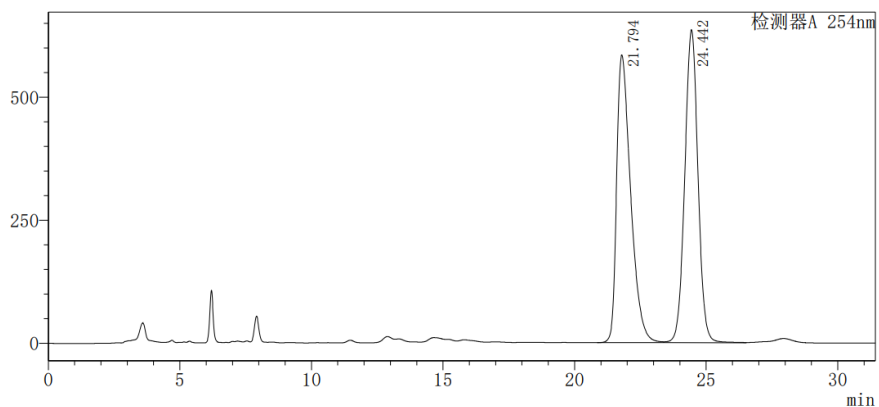

<峰表>

检测器A 254nm

| 峰号 | 保留时间   | 面积       | 高度      | 浓度     | 浓度单位 | 标记 | 化合物名 |
|----|--------|----------|---------|--------|------|----|------|
| 1  | 21.794 | 21664013 | 584532  | 49.345 |      |    |      |
| 2  | 24.442 | 22239552 | 635827  | 50.655 |      | V  |      |
| 总计 |        | 43903564 | 1220360 |        |      |    |      |

画

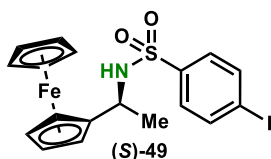

(S)-49

<色谱图>

mV

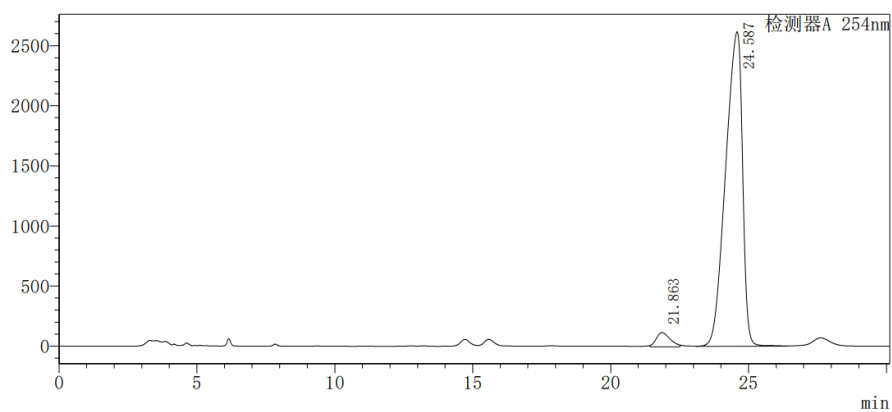

<峰表>

检测器A 254nm

| 峰号 | 保留时间   | 面积        | 高度      | 浓度     | 浓度单位 | 标记 | 化合物名 |
|----|--------|-----------|---------|--------|------|----|------|
| 1  | 21.863 | 4108180   | 118019  | 3.565  |      | M  |      |
| 2  | 24.587 | 111138871 | 2616979 | 96.435 |      |    |      |
| 总计 |        | 115247051 | 2734998 |        |      |    |      |

画

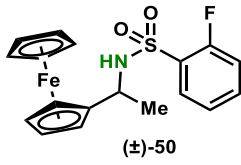

<色谱图>

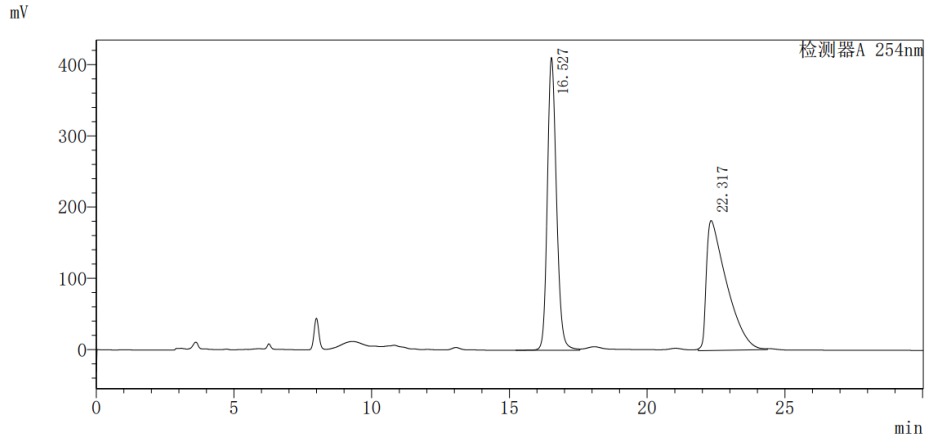

<峰表>

检测器A 254nm

| 峰号 | 保留时间   | 面积       | 高度     | 浓度     | 浓度单位 | 标记 | 化合物名 |
|----|--------|----------|--------|--------|------|----|------|
| 1  | 16.527 | 9500375  | 410805 | 50.409 |      |    |      |
| 2  | 22.317 | 9346208  | 182376 | 49.591 |      | M  |      |
| 总计 |        | 18846583 | 593181 |        |      |    |      |

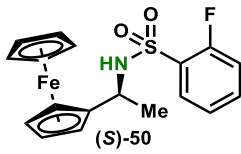

<色谱图>

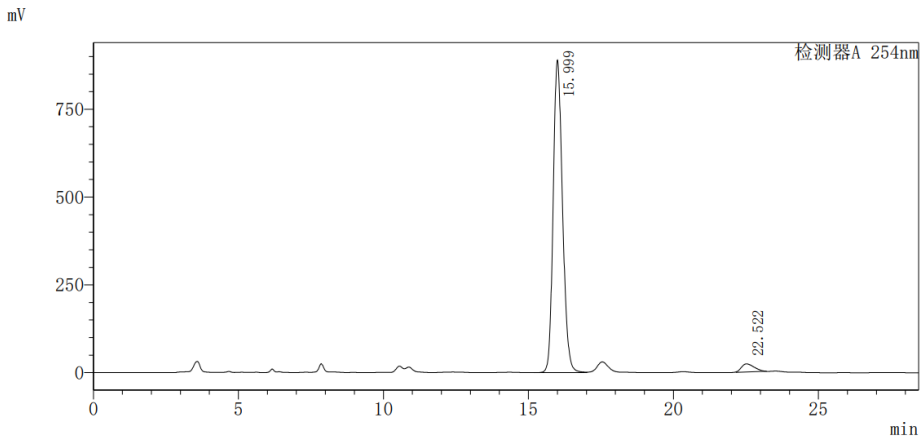

<峰表>

检测器A 254nm

| 峰号 | 保留时间   | 面积       | 高度     | 浓度     | 浓度单位 | 标记 | 化合物名 |
|----|--------|----------|--------|--------|------|----|------|
| 1  | 15.999 | 19979600 | 889789 | 96.550 |      |    |      |
| 2  | 22.522 | 713976   | 23292  | 3.450  |      | M  |      |
| 总计 |        | 20693576 | 913082 |        |      |    |      |

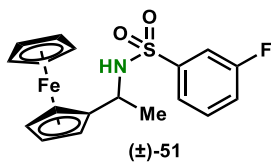

<色谱图>

mV

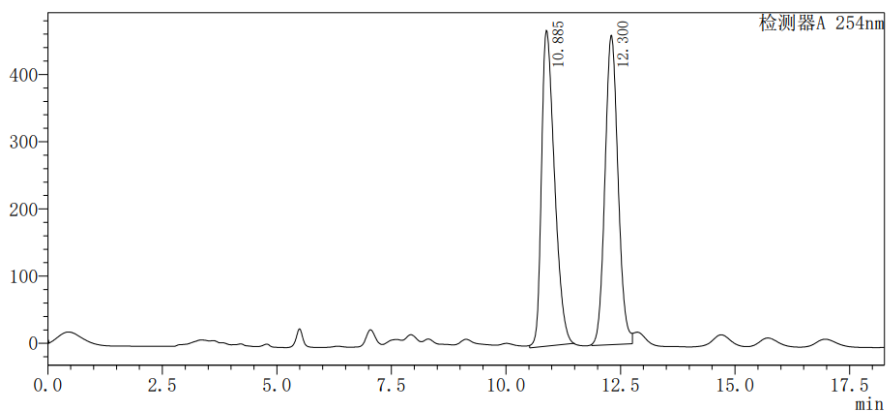

<峰表>

检测器A 254nm

| 峰号 | 保留时间   | 面积       | 高度     | 浓度     | 浓度单位 | 标记 | 化合物名 |
|----|--------|----------|--------|--------|------|----|------|
| 1  | 10.885 | 9282792  | 469846 | 50.381 |      | M  |      |
| 2  | 12.300 | 9142525  | 460526 | 49.619 |      | M  |      |
| 总计 |        | 18425317 | 930372 |        |      |    |      |

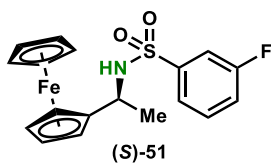

<色谱图>

mV

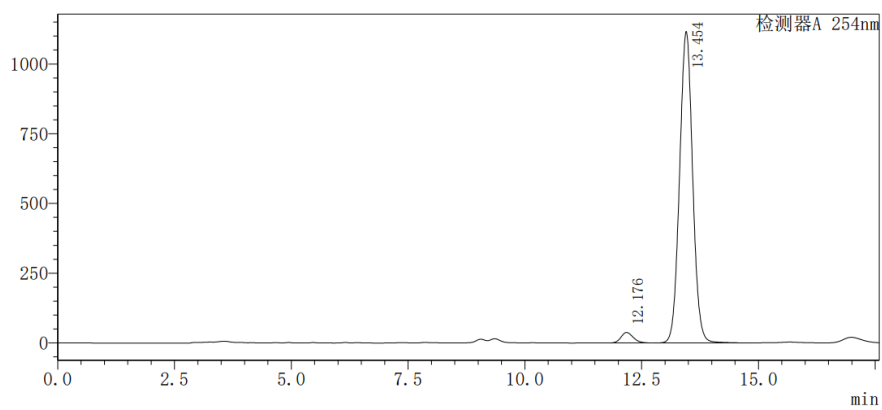

<峰表>

检测器A 254nm

| 峰号 | 保留时间   | 面积       | 高度      | 浓度     | 浓度单位 | 标记 | 化合物名 |
|----|--------|----------|---------|--------|------|----|------|
| 1  | 12.176 | 683818   | 37648   | 3.044  |      | M  |      |
| 2  | 13.454 | 21779222 | 1116718 | 96.956 |      |    |      |
| 总计 |        | 22463040 | 1154365 |        |      |    |      |

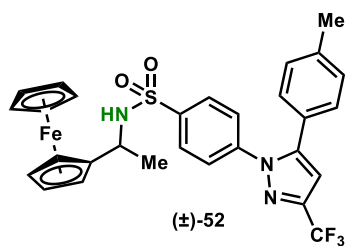

<色谱图>

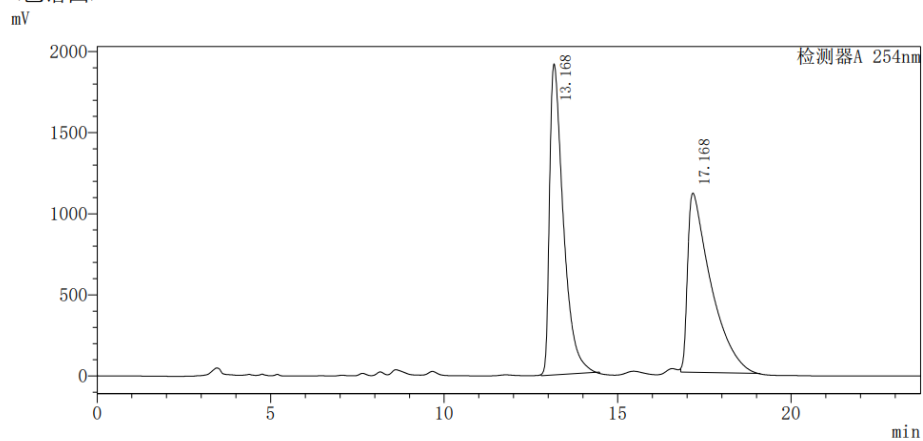

<峰表>

检测器A 254nm

| 峰号 | 保留时间   | 面积        | 高度      | 浓度     | 浓度单位 | 标记 | 化合物名 |
|----|--------|-----------|---------|--------|------|----|------|
| 1  | 13.168 | 52995977  | 1916262 | 50.684 |      | M  |      |
| 2  | 17.168 | 51565793  | 1105042 | 49.316 |      | M  |      |
| 总计 |        | 104561770 | 3021304 |        |      |    |      |

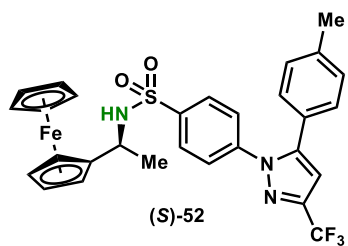

<色谱图>

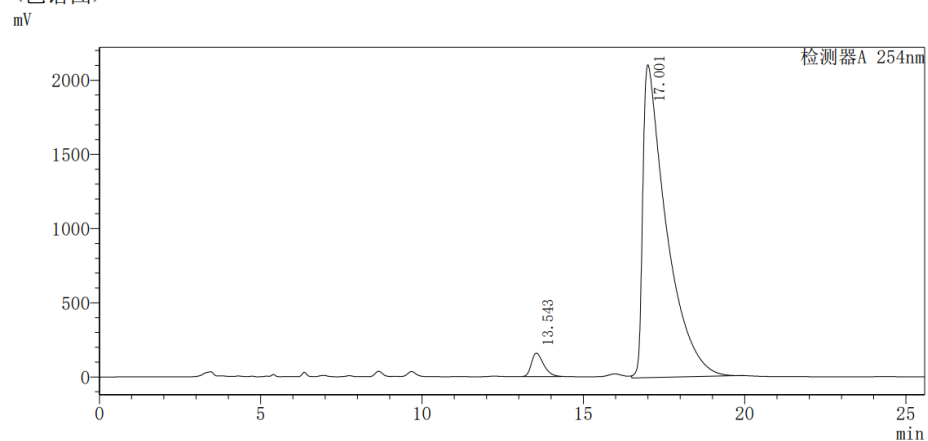

<峰表>

检测器A 254nm

| 峰号 | 保留时间   | 面积        | 高度      | 浓度     | 浓度单位 | 标记 | 化合物名 |
|----|--------|-----------|---------|--------|------|----|------|
| 1  | 13.543 | 4211878   | 158639  | 3.769  |      | M  |      |
| 2  | 17.001 | 107529442 | 2107816 | 96.231 |      | M  |      |
| 总计 |        | 111741320 | 2266455 |        |      |    |      |

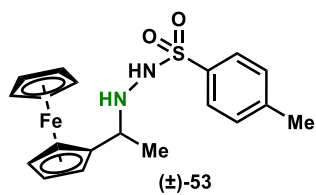

<色谱图>

mV

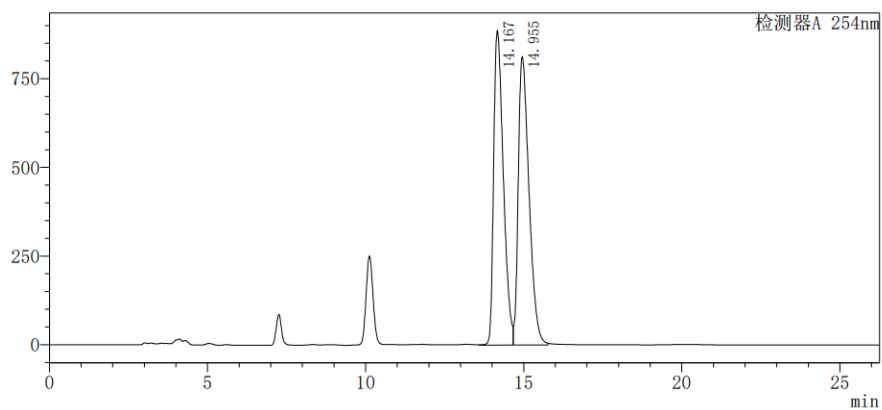

<峰表>

检测器A 254nm

| 峰号 | 保留时间   | 面积       | 高度      | 浓度     | 浓度单位 | 标记  | 化合物名 |
|----|--------|----------|---------|--------|------|-----|------|
| 1  | 14.167 | 18875668 | 887060  | 49.530 |      |     |      |
| 2  | 14.955 | 19233881 | 812718  | 50.470 |      | V M |      |
| 总计 |        | 38109548 | 1699778 |        |      |     |      |

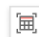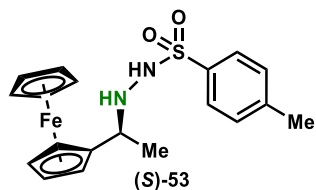

<色谱图>

mV

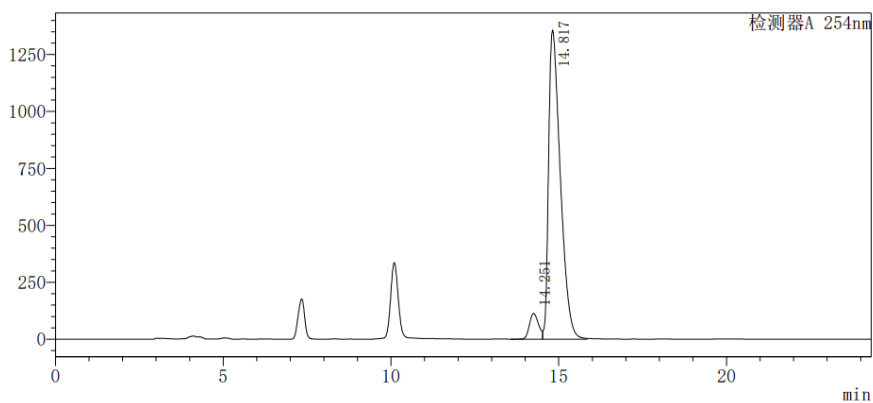

<峰表>

检测器A 254nm

| 峰号 | 保留时间   | 面积       | 高度      | 浓度     | 浓度单位 | 标记  | 化合物名 |
|----|--------|----------|---------|--------|------|-----|------|
| 1  | 14.251 | 2165543  | 113304  | 6.150  |      |     |      |
| 2  | 14.817 | 33044613 | 1356535 | 93.850 |      | V M |      |
| 总计 |        | 35210156 | 1469839 |        |      |     |      |

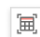

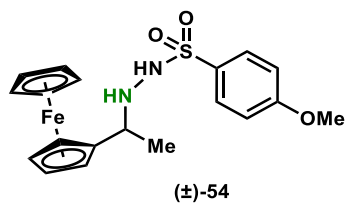

<色谱图>

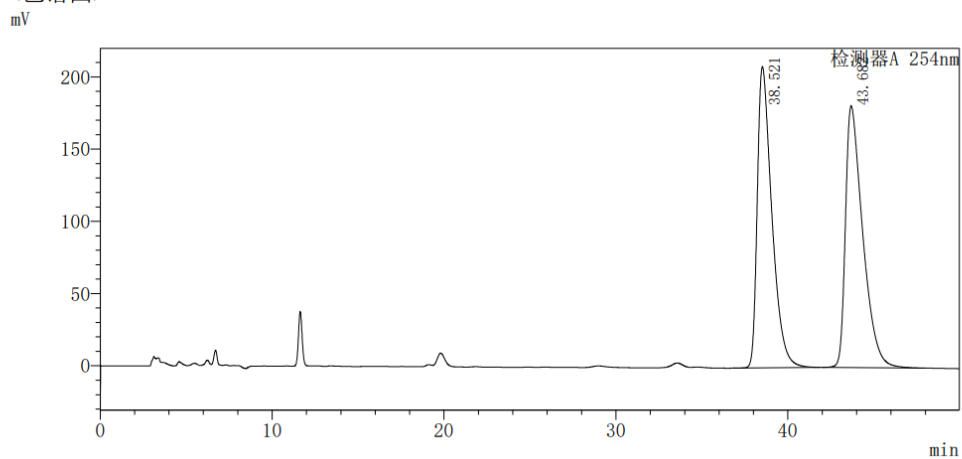

<峰表>

检测器A 254nm

| 峰号 | 保留时间   | 面积       | 高度     | 浓度     | 浓度单位 | 标记 | 化合物名 |
|----|--------|----------|--------|--------|------|----|------|
| 1  | 38.521 | 12307474 | 208624 | 49.265 |      |    |      |
| 2  | 43.682 | 12674718 | 181141 | 50.735 |      |    |      |
| 总计 |        | 24982192 | 389766 |        |      |    |      |

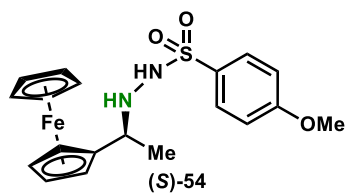

<色谱图>

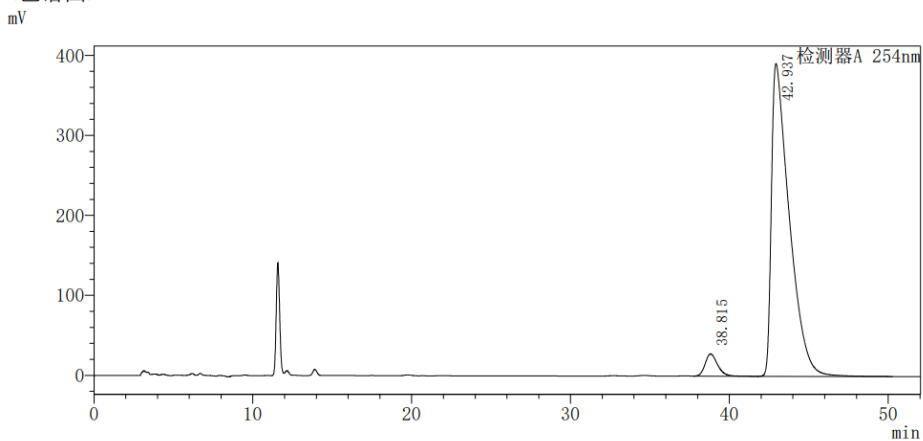

<峰表>

检测器A 254nm

| 峰号 | 保留时间   | 面积       | 高度     | 浓度     | 浓度单位 | 标记 | 化合物名 |
|----|--------|----------|--------|--------|------|----|------|
| 1  | 38.815 | 1534084  | 27849  | 4.775  |      |    |      |
| 2  | 42.937 | 30593392 | 391013 | 95.225 |      |    |      |
| 总计 |        | 32127476 | 418862 |        |      |    |      |

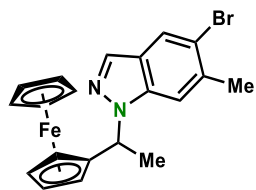

(±)-55

<色谱图>

mV

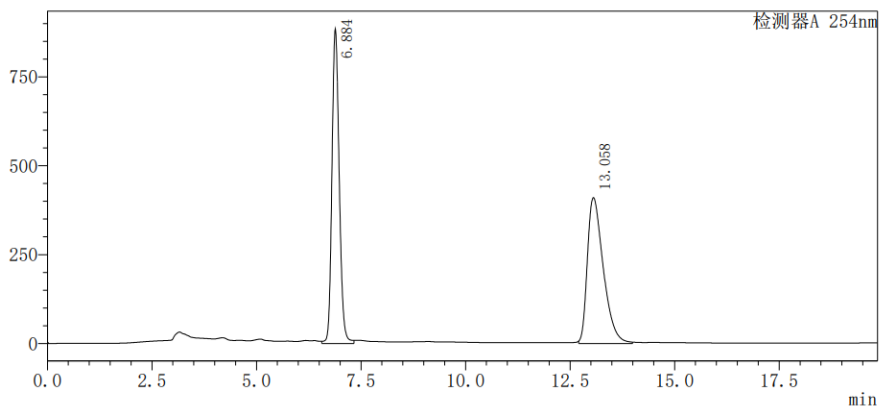

<峰表>

检测器A 254nm

| 峰号 | 保留时间   | 面积       | 高度      | 浓度     | 浓度单位 | 标记 | 化合物名 |
|----|--------|----------|---------|--------|------|----|------|
| 1  | 6.884  | 10719999 | 885678  | 49.609 |      | M  |      |
| 2  | 13.058 | 10888894 | 411101  | 50.391 |      | M  |      |
| 总计 |        | 21608894 | 1296779 |        |      |    |      |

画

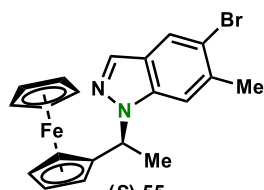

(S)-55

<色谱图>

mV

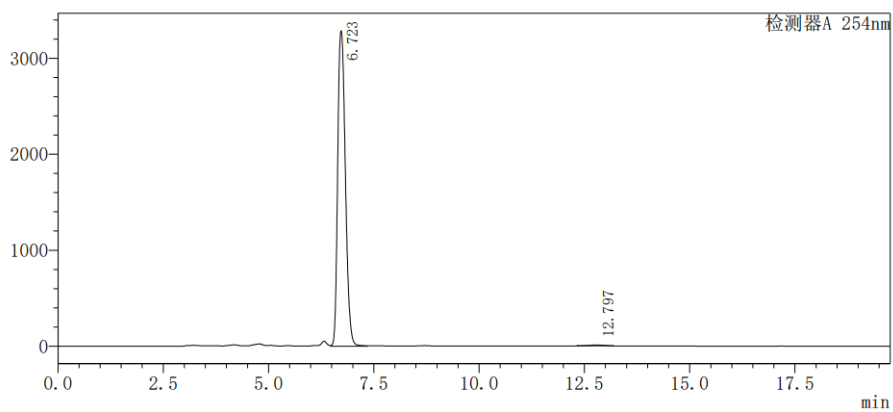

<峰表>

检测器A 254nm

| 峰号 | 保留时间   | 面积       | 高度      | 浓度     | 浓度单位 | 标记 | 化合物名 |
|----|--------|----------|---------|--------|------|----|------|
| 1  | 6.723  | 41532962 | 3286738 | 99.441 |      | M  |      |
| 2  | 12.797 | 233541   | 9378    | 0.559  |      | M  |      |
| 总计 |        | 41766503 | 3296116 |        |      |    |      |

画

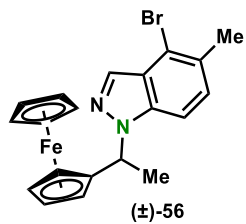

<色谱图>

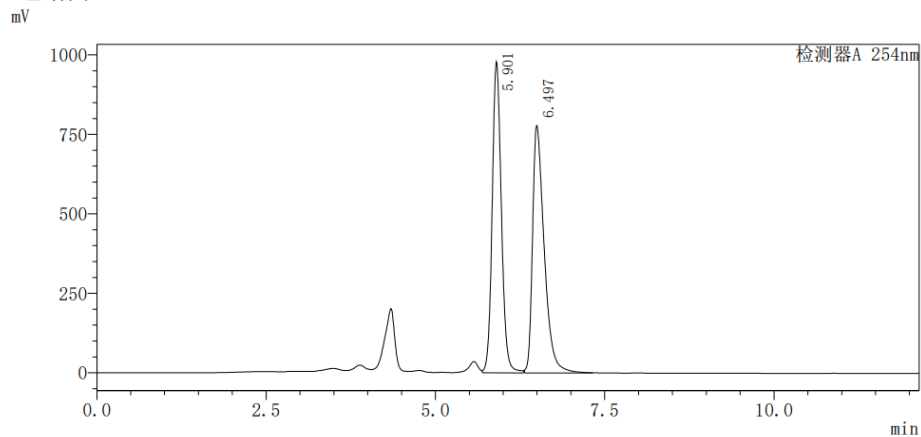

<峰表>

检测器A 254nm

| 峰号 | 保留时间  | 面积       | 高度      | 浓度     | 浓度单位 | 标记 | 化合物名 |
|----|-------|----------|---------|--------|------|----|------|
| 1  | 5.901 | 9222281  | 978512  | 49.665 |      | M  |      |
| 2  | 6.497 | 9346812  | 778237  | 50.335 |      | M  |      |
| 总计 |       | 18569093 | 1756749 |        |      |    |      |

画

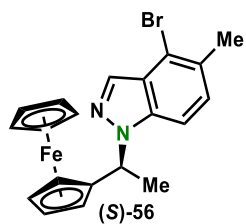

<色谱图>

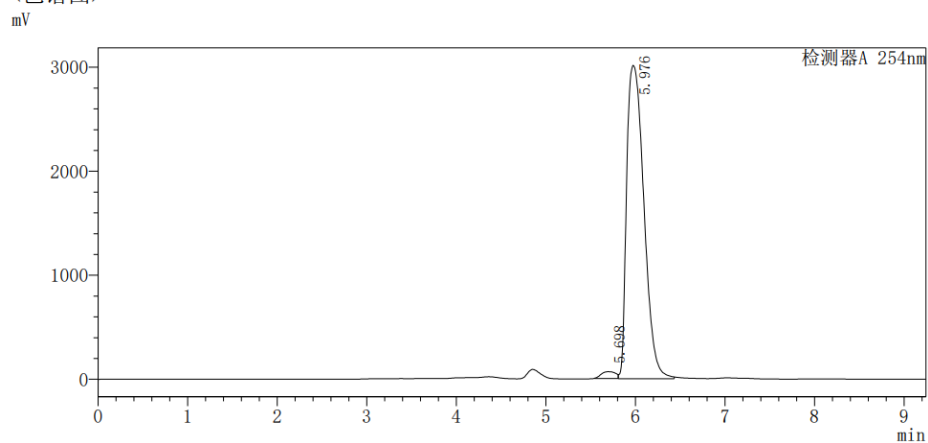

<峰表>

检测器A 254nm

| 峰号 | 保留时间  | 面积       | 高度      | 浓度     | 浓度单位 | 标记 | 化合物名 |
|----|-------|----------|---------|--------|------|----|------|
| 1  | 5.698 | 745265   | 65642   | 1.818  |      | M  |      |
| 2  | 5.976 | 40257302 | 3013190 | 98.182 |      | M  |      |
| 总计 |       | 41002567 | 3078832 |        |      |    |      |

画

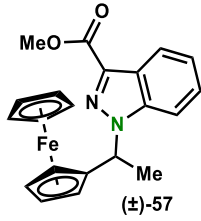

<色谱图>  
mV

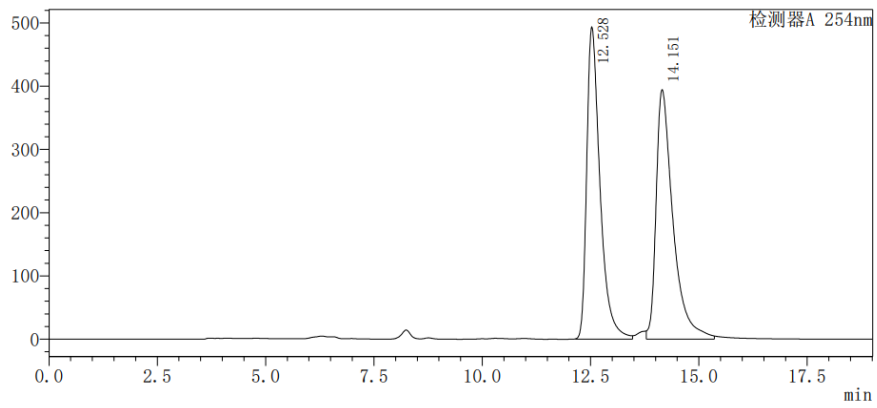

<峰表>

检测器A 254nm

| 峰号 | 保留时间   | 面积       | 高度     | 浓度     | 浓度单位 | 标记 | 化合物名 |
|----|--------|----------|--------|--------|------|----|------|
| 1  | 12.528 | 10533998 | 493774 | 49.595 |      | M  |      |
| 2  | 14.151 | 10706080 | 394863 | 50.405 |      | M  |      |
| 总计 |        | 21240078 | 888638 |        |      |    |      |

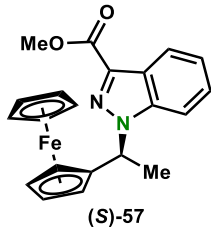

<色谱图>  
mV

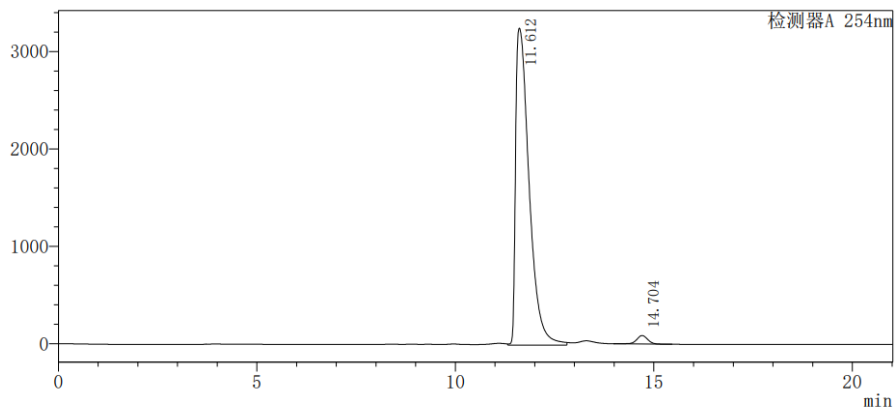

<峰表>

检测器A 254nm

| 峰号 | 保留时间   | 面积       | 高度      | 浓度     | 浓度单位 | 标记 | 化合物名 |
|----|--------|----------|---------|--------|------|----|------|
| 1  | 11.612 | 76943854 | 3254574 | 97.852 |      | M  |      |
| 2  | 14.704 | 1688827  | 86616   | 2.148  |      |    |      |
| 总计 |        | 78632680 | 3341190 |        |      |    |      |

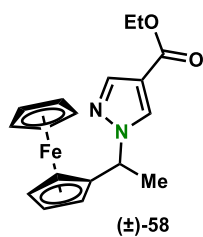

<色谱图>

mV

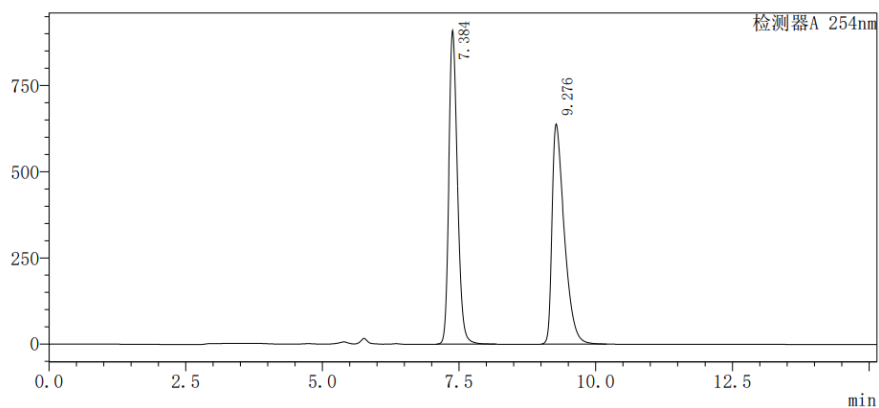

<峰表>

检测器A 254nm

| 峰号 | 保留时间  | 面积       | 高度      | 浓度     | 浓度单位 | 标记 | 化合物名 |
|----|-------|----------|---------|--------|------|----|------|
| 1  | 7.384 | 9994881  | 909360  | 49.997 |      | M  |      |
| 2  | 9.276 | 9996022  | 638899  | 50.003 |      | M  |      |
| 总计 |       | 19990903 | 1548259 |        |      |    |      |

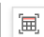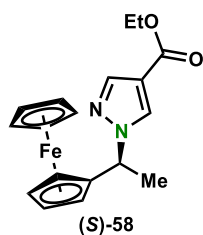

<色谱图>

mV

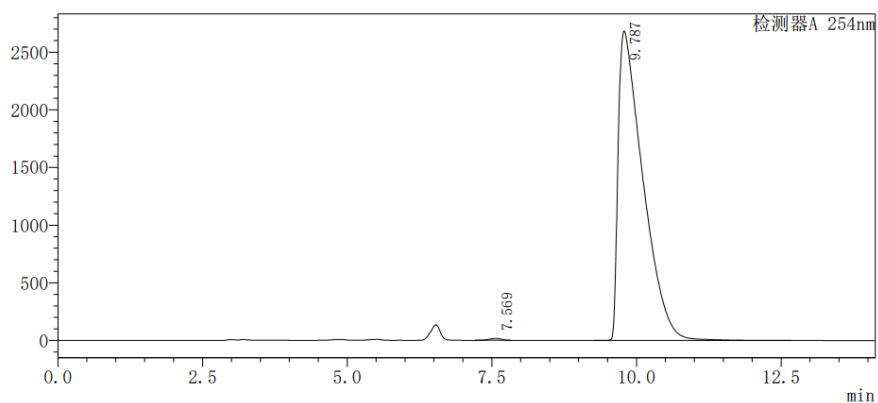

<峰表>

检测器A 254nm

| 峰号 | 保留时间  | 面积       | 高度      | 浓度     | 浓度单位 | 标记 | 化合物名 |
|----|-------|----------|---------|--------|------|----|------|
| 1  | 7.569 | 236963   | 17275   | 0.296  |      |    |      |
| 2  | 9.787 | 79901506 | 2682823 | 99.704 |      | M  |      |
| 总计 |       | 80138470 | 2700098 |        |      |    |      |

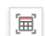

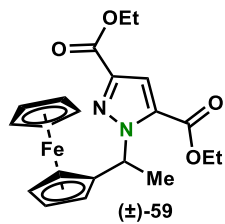

<色谱图>  
mV

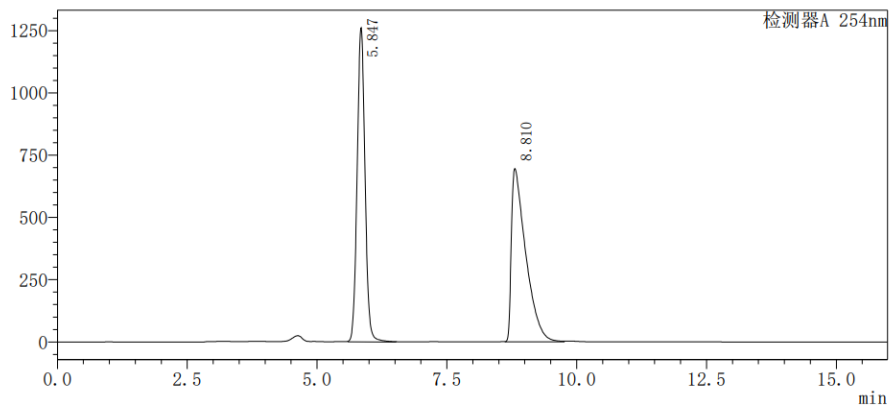

<峰表>

检测器A 254nm

| 峰号 | 保留时间  | 面积       | 高度      | 浓度     | 浓度单位 | 标记 | 化合物名 |
|----|-------|----------|---------|--------|------|----|------|
| 1  | 5.847 | 13330049 | 1261236 | 49.737 |      | M  |      |
| 2  | 8.810 | 13470989 | 695704  | 50.263 |      | M  |      |
| 总计 |       | 26801038 | 1956940 |        |      |    |      |

画

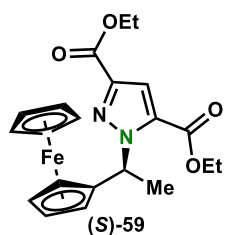

<色谱图>  
mV

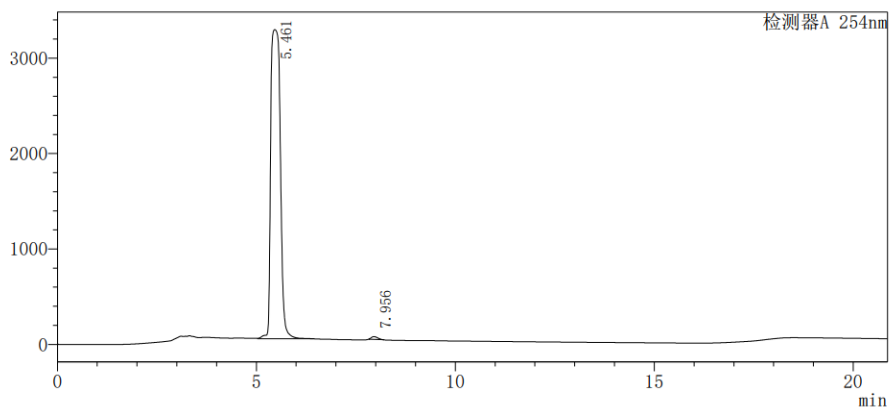

<峰表>

检测器A 254nm

| 峰号 | 保留时间  | 面积       | 高度      | 浓度     | 浓度单位 | 标记 | 化合物名 |
|----|-------|----------|---------|--------|------|----|------|
| 1  | 5.461 | 54312820 | 3239453 | 99.411 |      | M  |      |
| 2  | 7.956 | 322008   | 28726   | 0.589  |      | M  |      |
| 总计 |       | 54634828 | 3268179 |        |      |    |      |

画

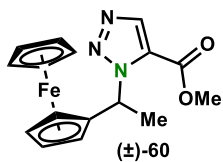

<色谱图>  
mV

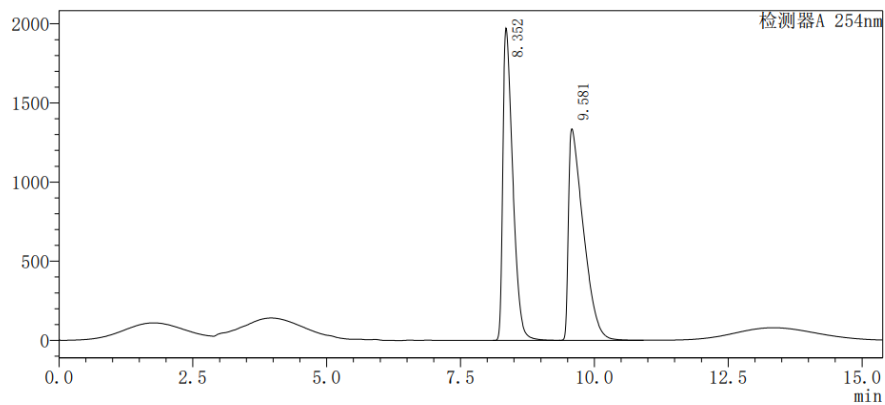

<峰表>

检测器A 254nm

| 峰号 | 保留时间  | 面积       | 高度      | 浓度     | 浓度单位 | 标记 | 化合物名 |
|----|-------|----------|---------|--------|------|----|------|
| 1  | 8.352 | 25602515 | 1973410 | 49.582 |      |    |      |
| 2  | 9.581 | 26033688 | 1337386 | 50.418 |      | V  |      |
| 总计 |       | 51636202 | 3310796 |        |      |    |      |

画

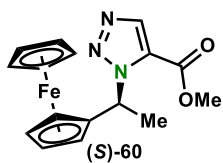

<色谱图>  
mV

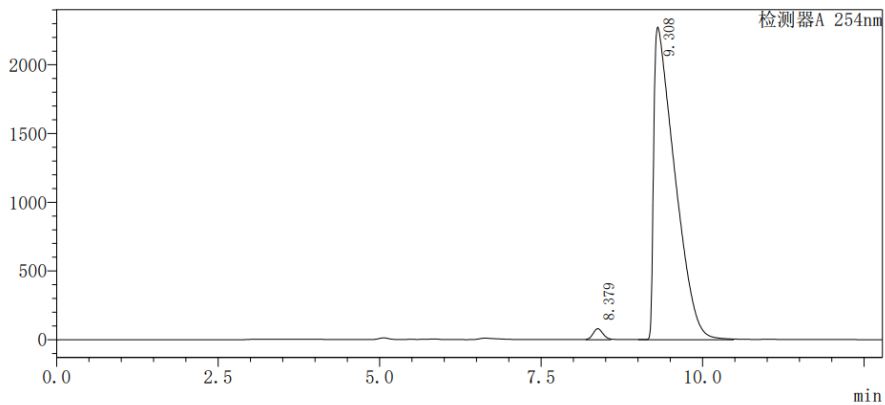

<峰表>

检测器A 254nm

| 峰号 | 保留时间  | 面积       | 高度      | 浓度     | 浓度单位 | 标记 | 化合物名 |
|----|-------|----------|---------|--------|------|----|------|
| 1  | 8.379 | 855649   | 80367   | 1.633  |      | M  |      |
| 2  | 9.308 | 51551266 | 2273748 | 98.367 |      | M  |      |
| 总计 |       | 52406915 | 2354115 |        |      |    |      |

画

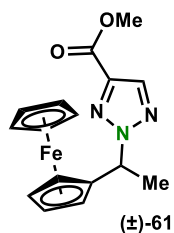

<色谱图>

mV

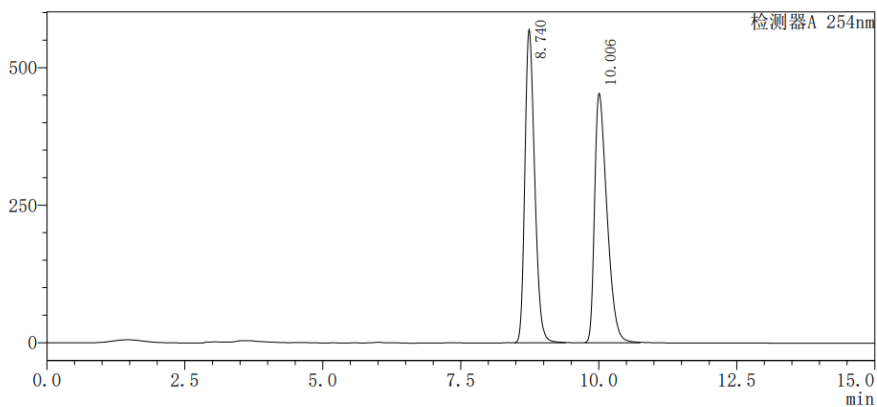

<峰表>

检测器A 254nm

| 峰号 | 保留时间   | 面积       | 高度      | 浓度     | 浓度单位 | 标记 | 化合物名 |
|----|--------|----------|---------|--------|------|----|------|
| 1  | 8.740  | 7061037  | 569800  | 49.906 |      | M  |      |
| 2  | 10.006 | 7087653  | 453809  | 50.094 |      | M  |      |
| 总计 |        | 14148690 | 1023608 |        |      |    |      |

画

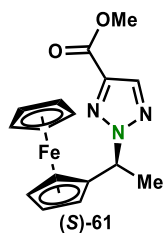

<色谱图>

mV

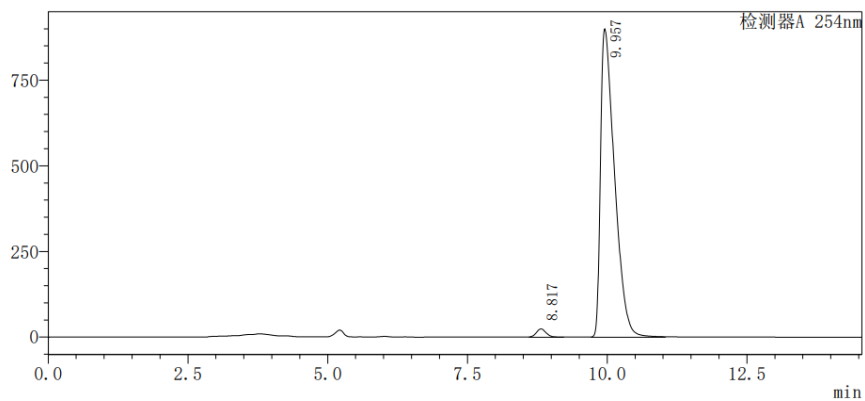

<峰表>

检测器A 254nm

| 峰号 | 保留时间  | 面积       | 高度     | 浓度     | 浓度单位 | 标记 | 化合物名 |
|----|-------|----------|--------|--------|------|----|------|
| 1  | 8.817 | 294798   | 23983  | 1.839  |      | M  |      |
| 2  | 9.957 | 15731357 | 899700 | 98.161 |      | M  |      |
| 总计 |       | 16026156 | 923683 |        |      |    |      |

画

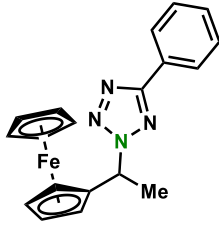

(±)-62

<色谱图>

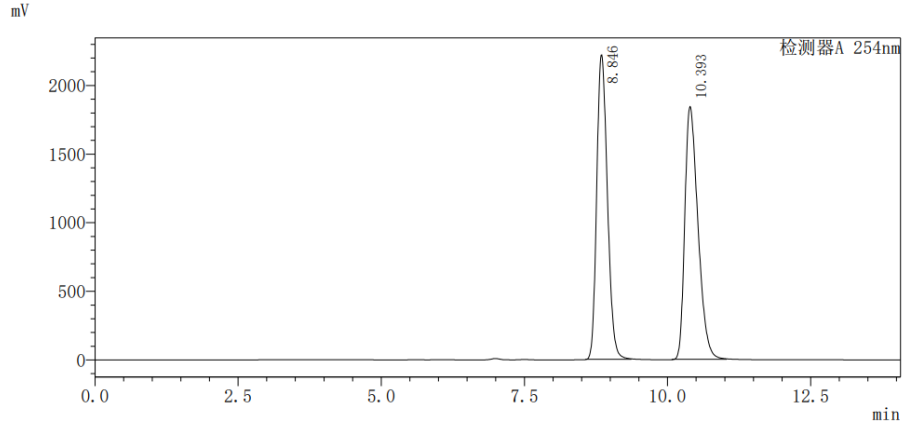

<峰表>

| 检测器A 254nm |        |          |         |         |         |
|------------|--------|----------|---------|---------|---------|
| 峰号         | 保留时间   | 面积       | 高度      | 面积%     | 高度%     |
| 1          | 8.846  | 28806242 | 2217654 | 49.423  | 54.622  |
| 2          | 10.393 | 29478745 | 1842333 | 50.577  | 45.378  |
| 总计         |        | 58284987 | 4059988 | 100.000 | 100.000 |

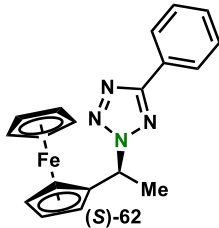

(S)-62

<色谱图>

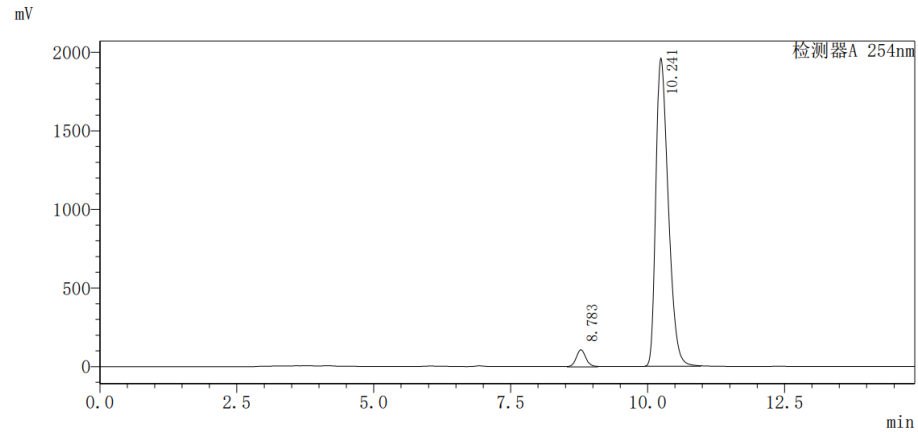

<峰表>

| 检测器A 254nm |        |          |         |        |      |    |
|------------|--------|----------|---------|--------|------|----|
| 峰号         | 保留时间   | 面积       | 高度      | 浓度     | 浓度单位 | 标记 |
| 1          | 8.783  | 1344820  | 108641  | 4.169  |      | M  |
| 2          | 10.241 | 30912506 | 1959641 | 95.831 |      | M  |
| 总计         |        | 32257326 | 2068282 |        |      |    |

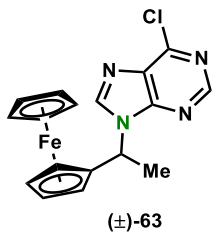

<色谱图>

mV

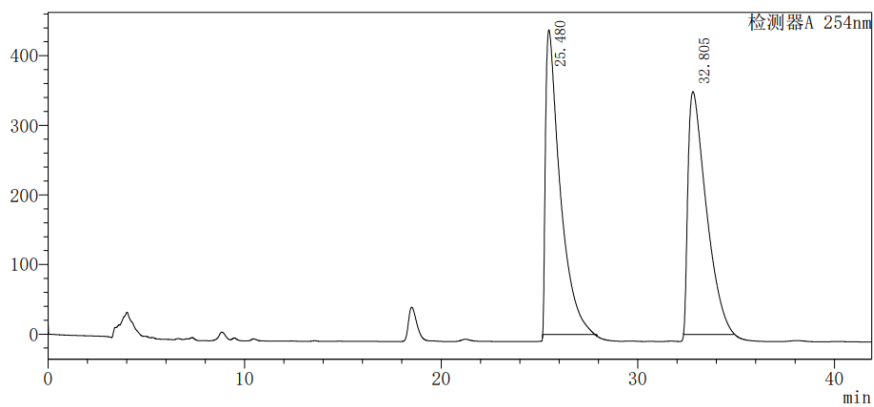

<峰表>

检测器A 254nm

| 峰号 | 保留时间   | 面积       | 高度     | 浓度     | 浓度单位 | 标记 | 化合物名 |
|----|--------|----------|--------|--------|------|----|------|
| 1  | 25.480 | 22672405 | 437619 | 50.112 |      | M  |      |
| 2  | 32.805 | 22571020 | 348848 | 49.888 |      | M  |      |
| 总计 |        | 45243425 | 786468 |        |      |    |      |

画

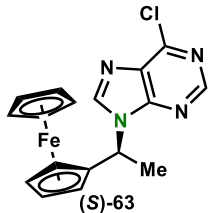

<色谱图>

mV

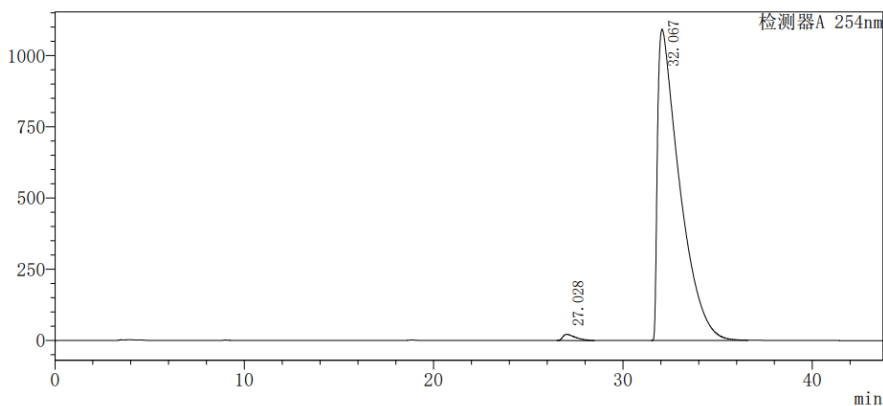

<峰表>

检测器A 254nm

| 峰号 | 保留时间   | 面积       | 高度      | 浓度     | 浓度单位 | 标记 | 化合物名 |
|----|--------|----------|---------|--------|------|----|------|
| 1  | 27.028 | 1022610  | 21600   | 1.143  |      | M  |      |
| 2  | 32.067 | 88427150 | 1091359 | 98.857 |      | M  |      |
| 总计 |        | 89449759 | 1112959 |        |      |    |      |

画

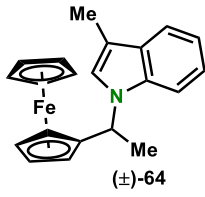

<色谱图>

mV

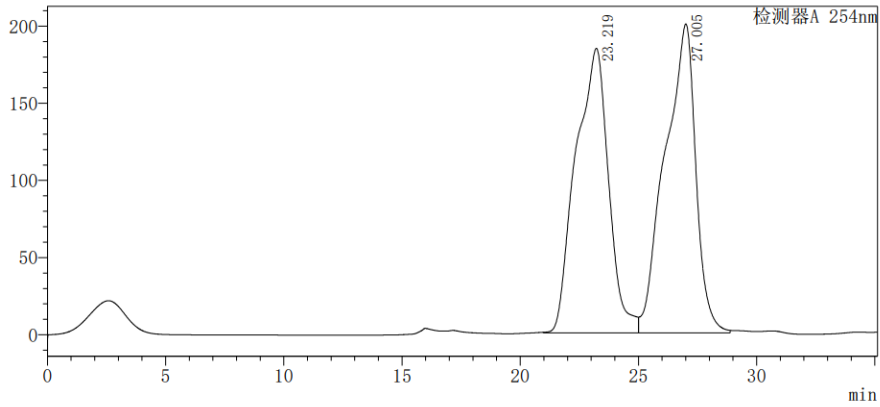

<峰表>

检测器A 254nm

| 峰号 | 保留时间   | 面积       | 高度     | 浓度     | 浓度单位 | 标记  | 化合物名 |
|----|--------|----------|--------|--------|------|-----|------|
| 1  | 23.219 | 17845204 | 184460 | 49.596 |      | M   |      |
| 2  | 27.005 | 18135881 | 200245 | 50.404 |      | V M |      |
| 总计 |        | 35981086 | 384705 |        |      |     |      |

图

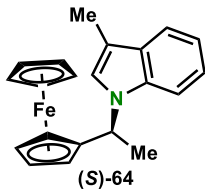

<色谱图>

mV

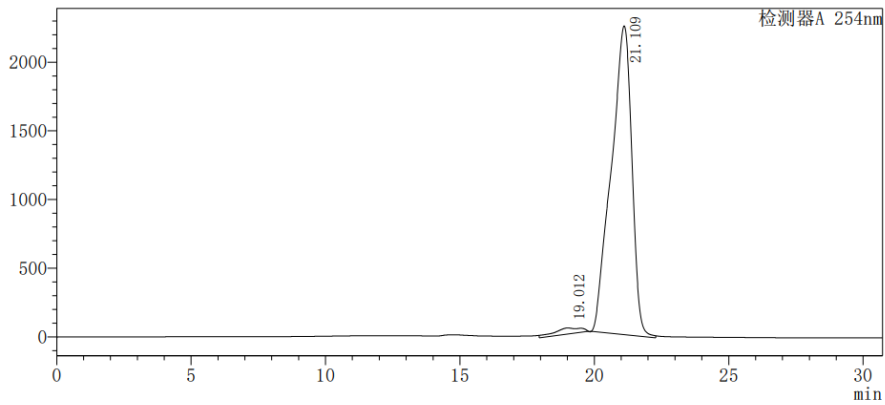

<峰表>

检测器A 254nm

| 峰号 | 保留时间   | 面积        | 高度      | 浓度     | 浓度单位 | 标记 | 化合物名 |
|----|--------|-----------|---------|--------|------|----|------|
| 1  | 19.012 | 3105071   | 44865   | 2.525  |      | M  |      |
| 2  | 21.109 | 119874080 | 2248595 | 97.475 |      | M  |      |
| 总计 |        | 122979151 | 2293461 |        |      |    |      |

图

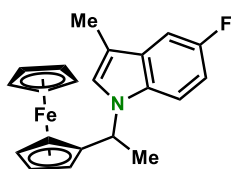

(±)-65

<色谱图>

mV

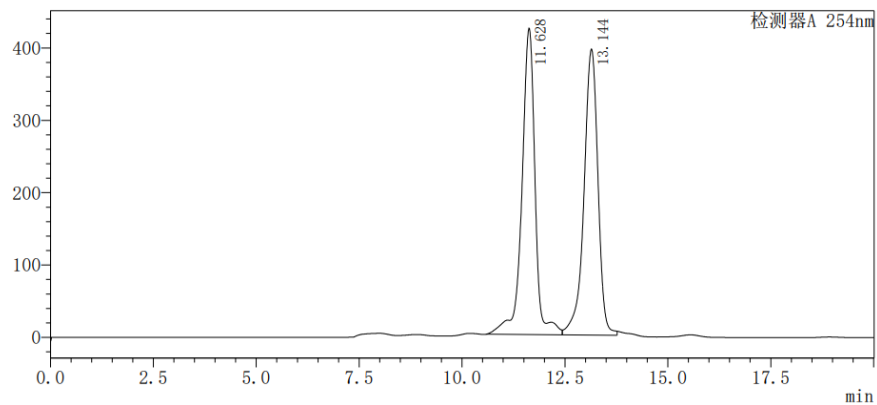

<峰表>

检测器A 254nm

| 峰号 | 保留时间   | 面积       | 高度     | 浓度     | 浓度单位 | 标记  | 化合物名 |
|----|--------|----------|--------|--------|------|-----|------|
| 1  | 11.628 | 9405872  | 423365 | 50.092 |      | M   |      |
| 2  | 13.144 | 9371262  | 395291 | 49.908 |      | V M |      |
| 总计 |        | 18777134 | 818656 |        |      |     |      |

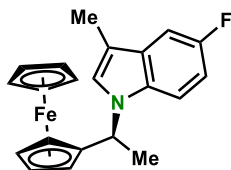

(S)-65

<色谱图>

mV

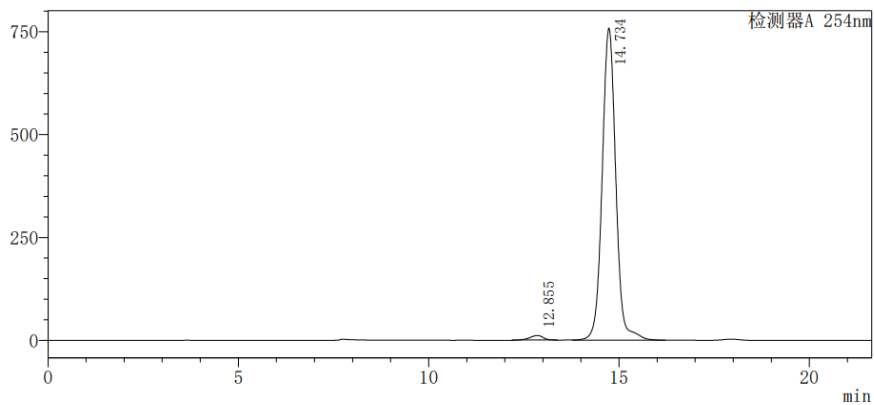

<峰表>

检测器A 254nm

| 峰号 | 保留时间   | 面积       | 高度     | 浓度     | 浓度单位 | 标记 | 化合物名 |
|----|--------|----------|--------|--------|------|----|------|
| 1  | 12.855 | 241124   | 10795  | 1.260  |      | M  |      |
| 2  | 14.734 | 18889811 | 758375 | 98.740 |      | M  |      |
| 总计 |        | 19130934 | 769170 |        |      |    |      |

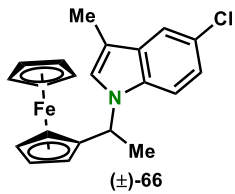

<色谱图>

mV

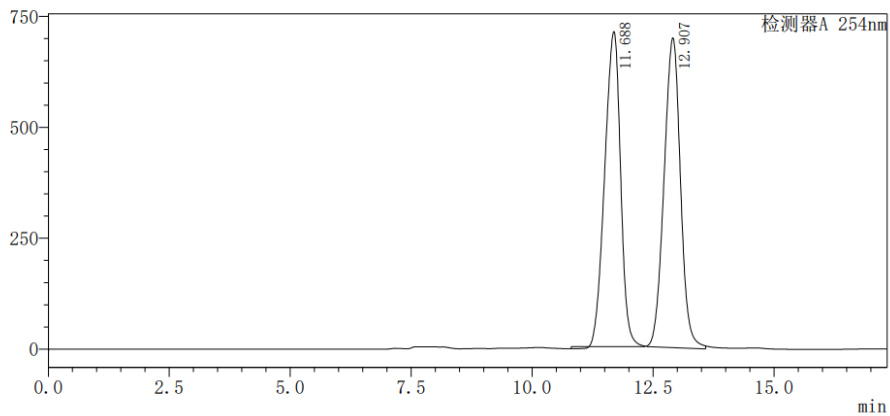

<峰表>

检测器A 254nm

| 峰号 | 保留时间   | 面积       | 高度      | 浓度     | 浓度单位 | 标记 | 化合物名 |
|----|--------|----------|---------|--------|------|----|------|
| 1  | 11.688 | 16084718 | 709820  | 49.398 |      | M  |      |
| 2  | 12.907 | 16476501 | 698504  | 50.602 |      | M  |      |
| 总计 |        | 32561219 | 1408324 |        |      |    |      |

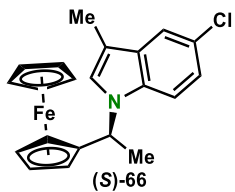

<色谱图>

mV

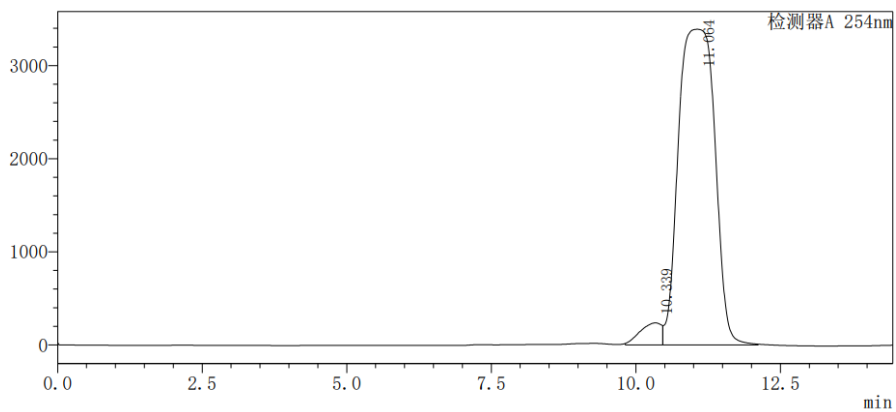

<峰表>

检测器A 254nm

| 峰号 | 保留时间   | 面积        | 高度      | 浓度     | 浓度单位 | 标记  | 化合物名 |
|----|--------|-----------|---------|--------|------|-----|------|
| 1  | 10.339 | 6080652   | 236224  | 3.938  |      | M   |      |
| 2  | 11.064 | 14833543  | 3389696 | 96.062 |      | V M |      |
| 总计 |        | 154416194 | 3625920 |        |      |     |      |

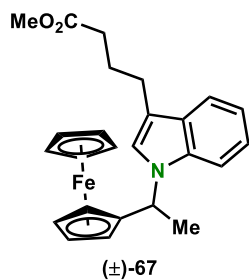

<色谱图>  
mV

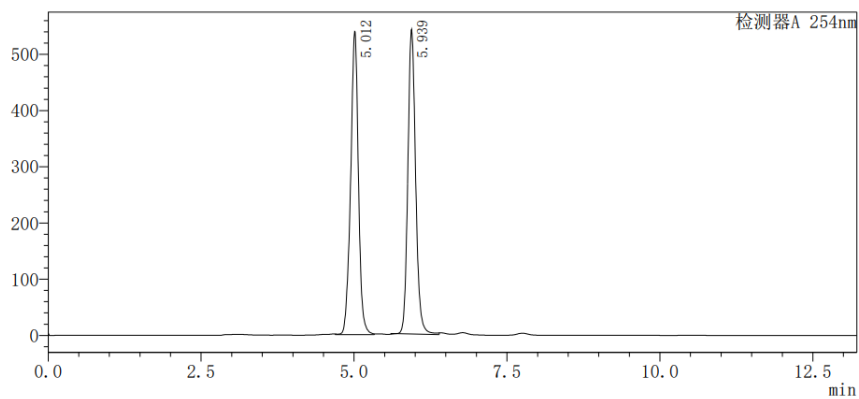

<峰表>

检测器A 254nm

| 峰号 | 保留时间  | 面积      | 高度      | 浓度     | 浓度单位 | 标记 | 化合物名 |
|----|-------|---------|---------|--------|------|----|------|
| 1  | 5.012 | 4785270 | 539659  | 49.895 |      | M  |      |
| 2  | 5.939 | 4805343 | 542259  | 50.105 |      | M  |      |
| 总计 |       | 9590614 | 1081918 |        |      |    |      |

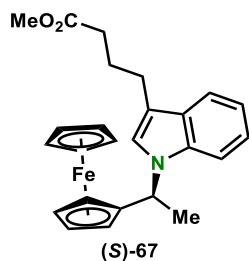

<色谱图>  
mV

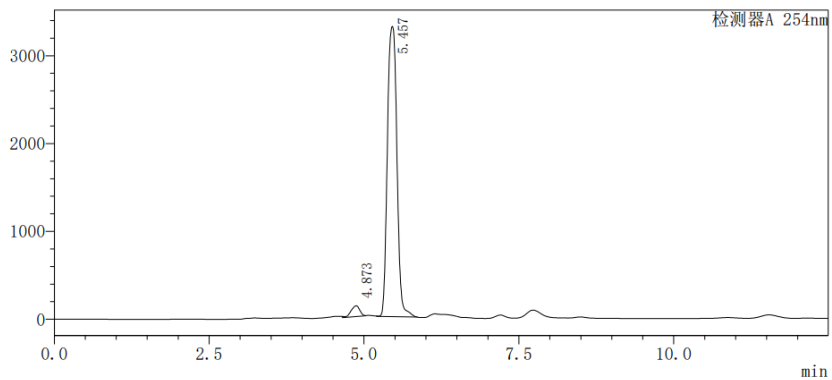

<峰表>

检测器A 254nm

| 峰号 | 保留时间  | 面积       | 高度      | 浓度     | 浓度单位 | 标记 | 化合物名 |
|----|-------|----------|---------|--------|------|----|------|
| 1  | 4.873 | 1212646  | 122820  | 3.328  |      | M  |      |
| 2  | 5.457 | 35226843 | 3303216 | 96.672 |      | M  |      |
| 总计 |       | 36439489 | 3426037 |        |      |    |      |

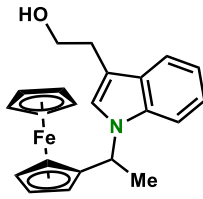

(±)-68

<色谱图>  
mV

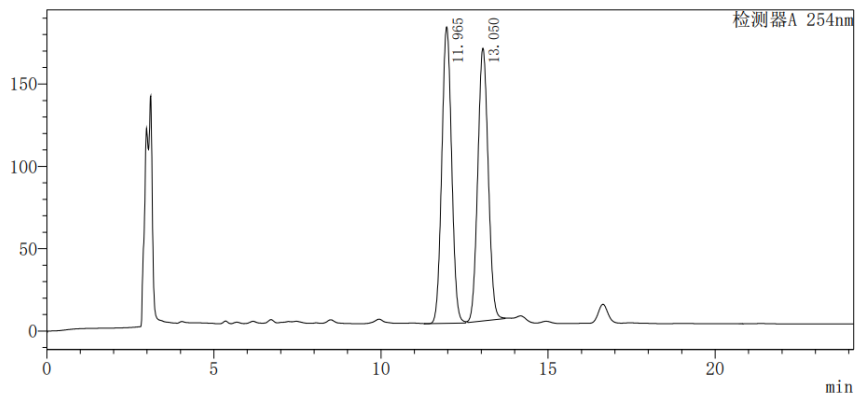

<峰表>

检测器A 254nm

| 峰号 | 保留时间   | 面积      | 高度     | 浓度     | 浓度单位 | 标记 | 化合物名 |
|----|--------|---------|--------|--------|------|----|------|
| 1  | 11.965 | 3684837 | 179942 | 50.541 |      | M  |      |
| 2  | 13.050 | 3605937 | 165592 | 49.459 |      | M  |      |
| 总计 |        | 7290774 | 345534 |        |      |    |      |

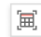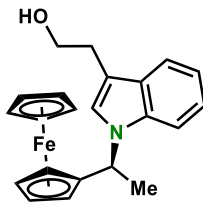

(S)-68

<色谱图>  
mV

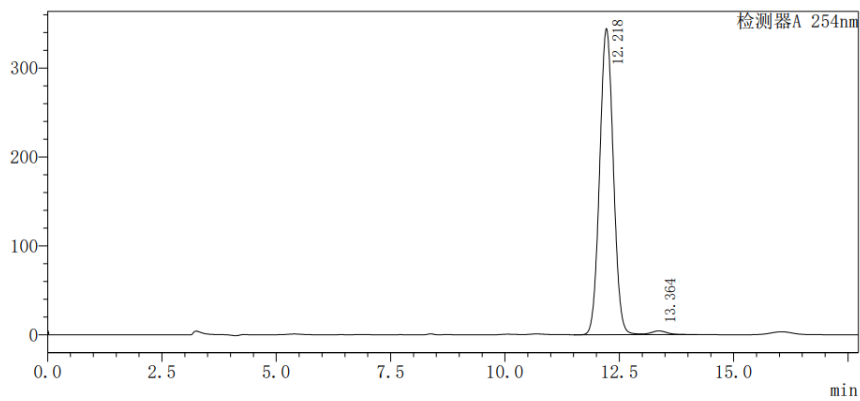

<峰表>

检测器A 254nm

| 峰号 | 保留时间   | 面积      | 高度     | 浓度     | 浓度单位 | 标记  | 化合物名 |
|----|--------|---------|--------|--------|------|-----|------|
| 1  | 12.218 | 7155643 | 344432 | 98.542 |      | M   |      |
| 2  | 13.364 | 105878  | 4215   | 1.458  |      | V M |      |
| 总计 |        | 7261521 | 348647 |        |      |     |      |

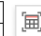

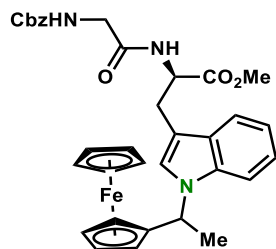

(±)-69

<色谱图>  
mV

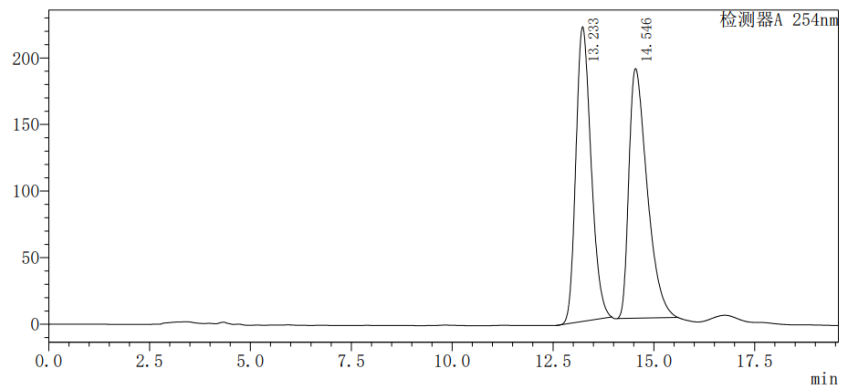

<峰表>

检测器A 254nm

| 峰号 | 保留时间   | 面积       | 高度     | 浓度     | 浓度单位 | 标记 | 化合物名 |
|----|--------|----------|--------|--------|------|----|------|
| 1  | 13.233 | 5812441  | 221233 | 49.570 |      | M  |      |
| 2  | 14.546 | 5913359  | 187449 | 50.430 |      | M  |      |
| 总计 |        | 11725801 | 408682 |        |      |    |      |

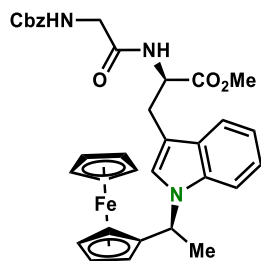

(S)-69

<色谱图>  
mV

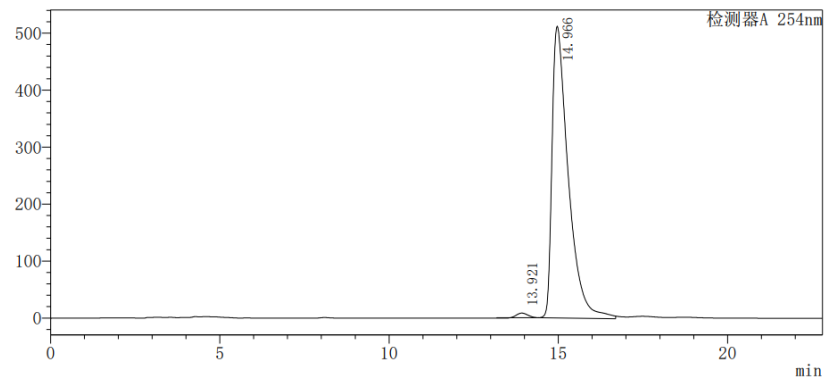

<峰表>

检测器A 254nm

| 峰号 | 保留时间   | 面积       | 高度     | 浓度     | 浓度单位 | 标记 | 化合物名 |
|----|--------|----------|--------|--------|------|----|------|
| 1  | 13.921 | 161624   | 8021   | 0.937  |      | M  |      |
| 2  | 14.966 | 17083461 | 511796 | 99.063 |      | M  |      |
| 总计 |        | 17245085 | 519817 |        |      |    |      |

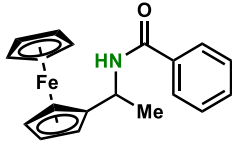

(±)-70

<色谱图>

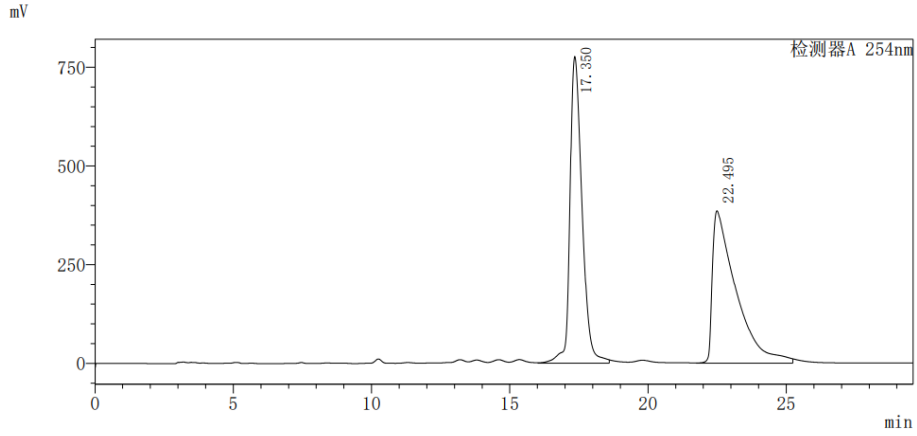

<峰表>

检测器A 254nm

| 峰号 | 保留时间   | 面积       | 高度      | 浓度     | 浓度单位 | 标记 | 化合物名 |
|----|--------|----------|---------|--------|------|----|------|
| 1  | 17.350 | 23609904 | 776620  | 50.725 |      | M  |      |
| 2  | 22.495 | 22934736 | 385943  | 49.275 |      | M  |      |
| 总计 |        | 46544640 | 1162562 |        |      |    |      |

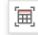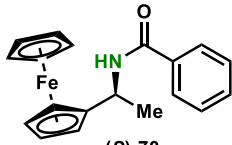

(S)-70

<色谱图>

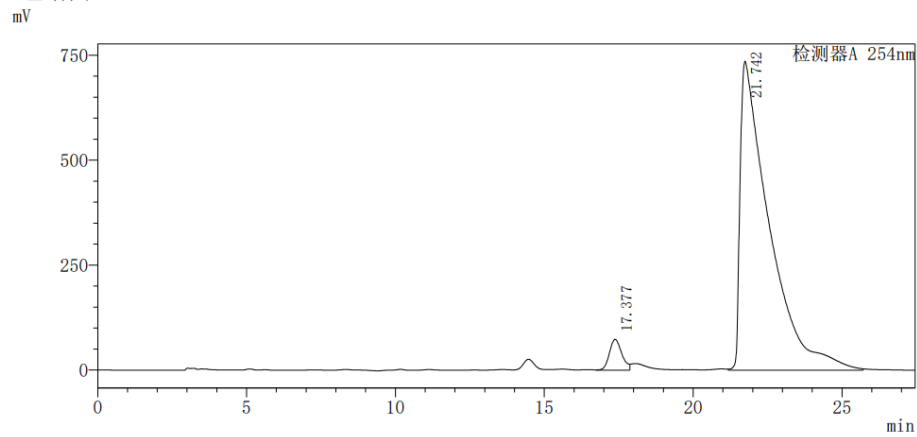

<峰表>

检测器A 254nm

| 峰号 | 保留时间   | 面积       | 高度     | 浓度     | 浓度单位 | 标记 | 化合物名 |
|----|--------|----------|--------|--------|------|----|------|
| 1  | 17.377 | 2140303  | 73261  | 4.120  |      |    |      |
| 2  | 21.742 | 49809002 | 736146 | 95.880 |      | M  |      |
| 总计 |        | 51949304 | 809408 |        |      |    |      |

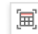

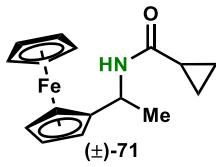

<色谱图>  
mV

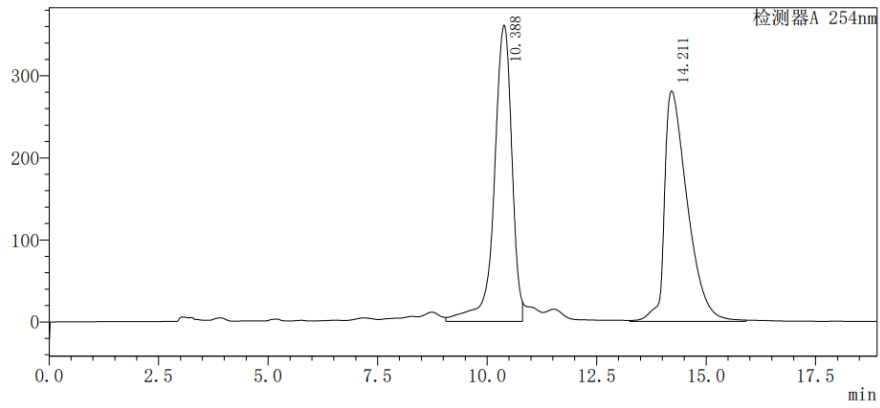

<峰表>

检测器A 254nm

| 峰号 | 保留时间   | 面积       | 高度     | 浓度     | 浓度单位 | 标记 | 化合物名 |
|----|--------|----------|--------|--------|------|----|------|
| 1  | 10.388 | 10143386 | 360992 | 49.746 |      | M  |      |
| 2  | 14.211 | 10246773 | 280968 | 50.254 |      | M  |      |
| 总计 |        | 20390159 | 641960 |        |      |    |      |

画

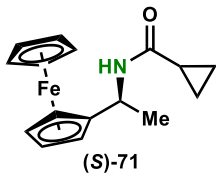

<色谱图>  
mV

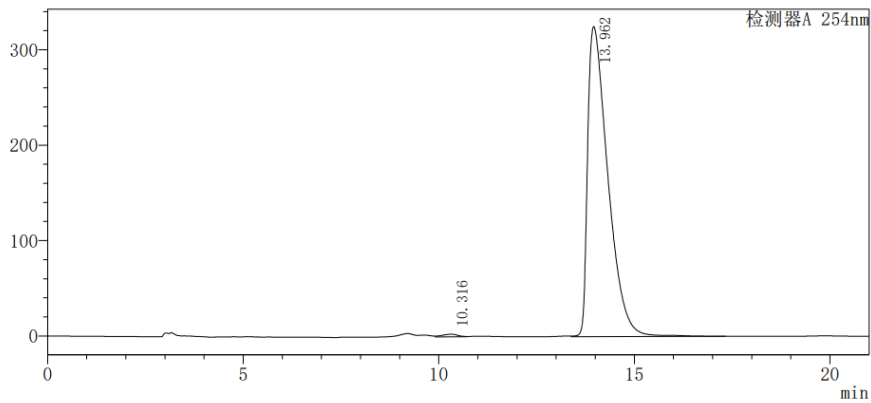

<峰表>

检测器A 254nm

| 峰号 | 保留时间   | 面积       | 高度     | 浓度     | 浓度单位 | 标记 | 化合物名 |
|----|--------|----------|--------|--------|------|----|------|
| 1  | 10.316 | 79101    | 2789   | 0.672  |      |    |      |
| 2  | 13.962 | 11694260 | 324931 | 99.328 |      |    |      |
| 总计 |        | 11773361 | 327720 |        |      |    |      |

画

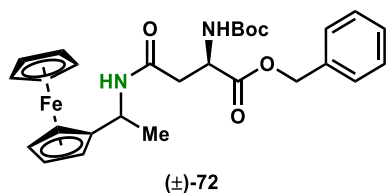

<色谱图>

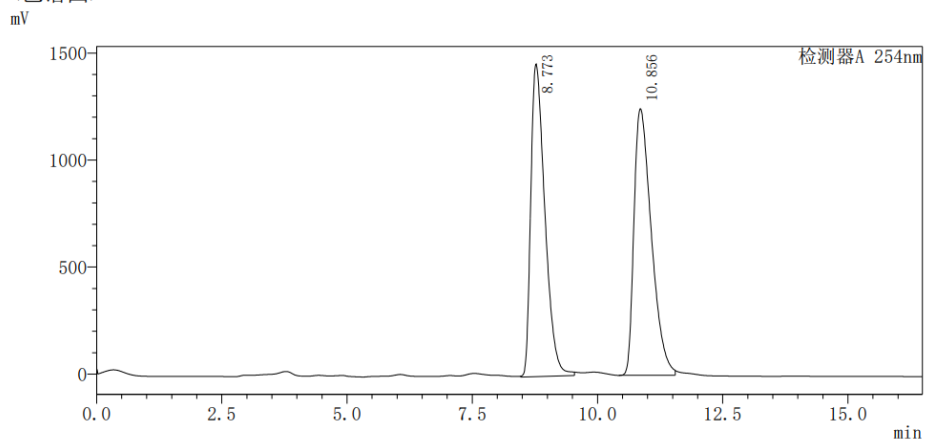

<峰表>

检测器A 254nm

| 峰号 | 保留时间   | 面积       | 高度      | 浓度     | 浓度单位 | 标记 | 化合物名 |
|----|--------|----------|---------|--------|------|----|------|
| 1  | 8.773  | 28646036 | 1460588 | 48.770 |      | M  |      |
| 2  | 10.856 | 30090548 | 1246048 | 51.230 |      | M  |      |
| 总计 |        | 58736584 | 2706636 |        |      |    |      |

画

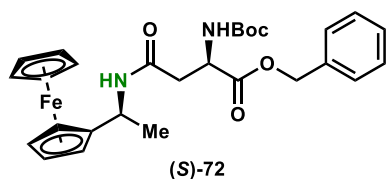

<色谱图>

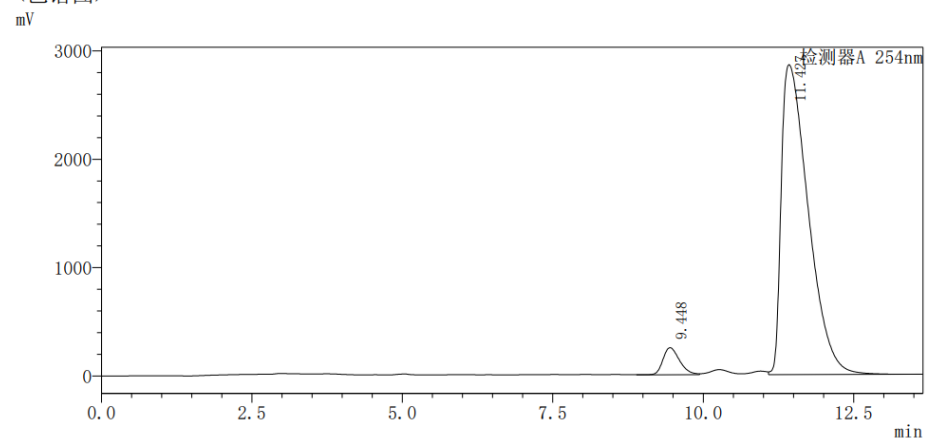

<峰表>

检测器A 254nm

| 峰号 | 保留时间   | 面积       | 高度      | 浓度     | 浓度单位 | 标记 | 化合物名 |
|----|--------|----------|---------|--------|------|----|------|
| 1  | 9.448  | 4854228  | 250744  | 5.158  |      |    |      |
| 2  | 11.427 | 89256685 | 2859288 | 94.842 |      |    |      |
| 总计 |        | 94110913 | 3110032 |        |      |    |      |

画

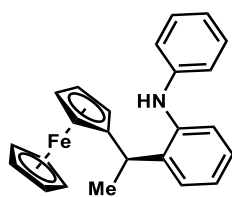

(±)-73

<色谱图>

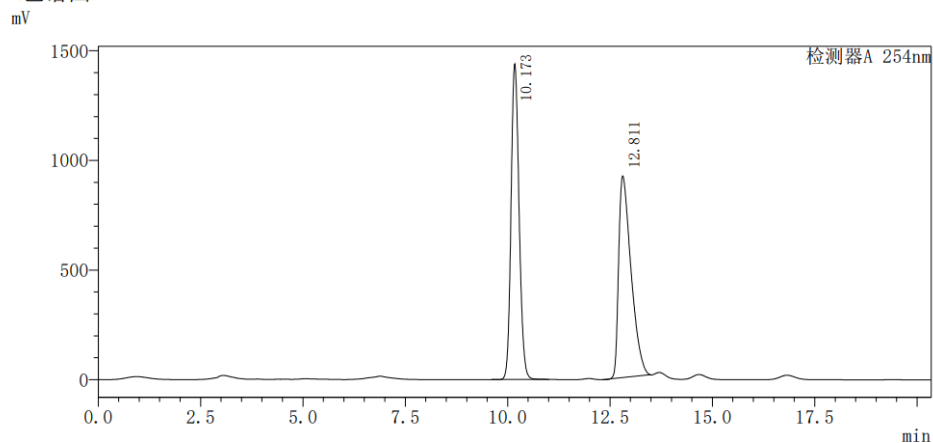

<峰表>

检测器A 254nm

| 峰号 | 保留时间   | 面积       | 高度      | 浓度     | 浓度单位 | 标记 | 化合物名 |
|----|--------|----------|---------|--------|------|----|------|
| 1  | 10.173 | 19658414 | 1438994 | 50.401 |      | M  |      |
| 2  | 12.811 | 19345759 | 920171  | 49.599 |      | M  |      |
| 总计 |        | 39004174 | 2359165 |        |      |    |      |

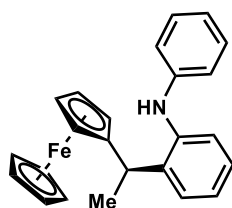

(S)-73

<色谱图>

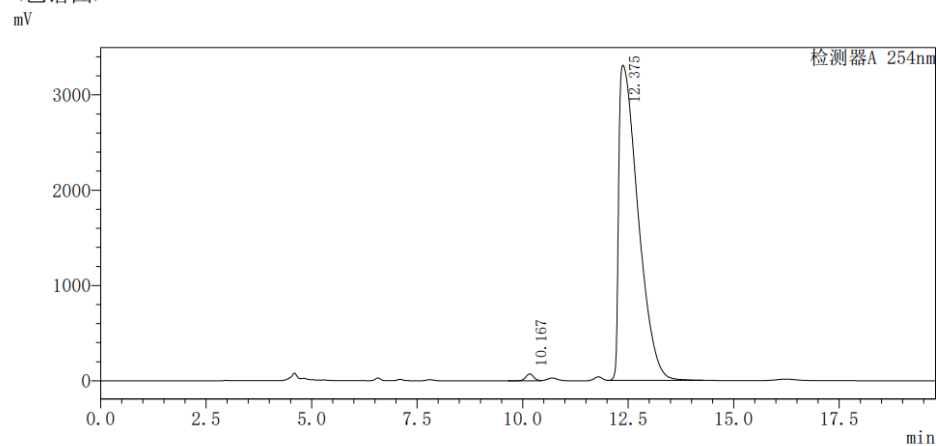

<峰表>

检测器A 254nm

| 峰号 | 保留时间   | 面积        | 高度      | 浓度     | 浓度单位 | 标记 | 化合物名 |
|----|--------|-----------|---------|--------|------|----|------|
| 1  | 10.167 | 966886    | 72357   | 0.909  |      |    |      |
| 2  | 12.375 | 105405884 | 3307955 | 99.091 |      | M  |      |
| 总计 |        | 106372770 | 3380311 |        |      |    |      |

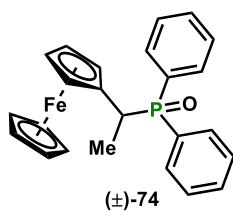

<色谱图>

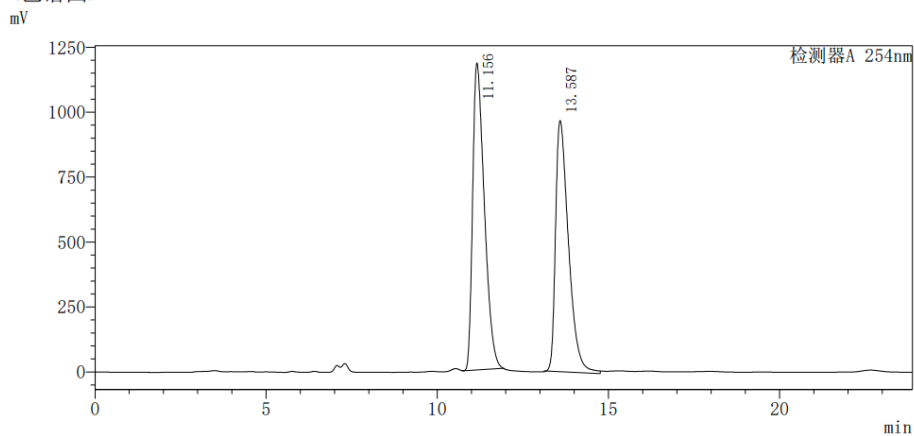

<峰表>

检测器A 254nm

| 峰号 | 保留时间   | 面积       | 高度      | 浓度     | 浓度单位 | 标记 | 化合物名 |
|----|--------|----------|---------|--------|------|----|------|
| 1  | 11.156 | 28006276 | 1181513 | 52.445 |      | M  |      |
| 2  | 13.587 | 25394783 | 967120  | 47.555 |      | M  |      |
| 总计 |        | 53401059 | 2148633 |        |      |    |      |

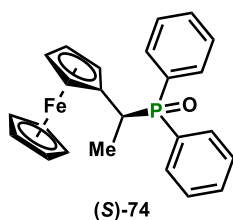

<色谱图>

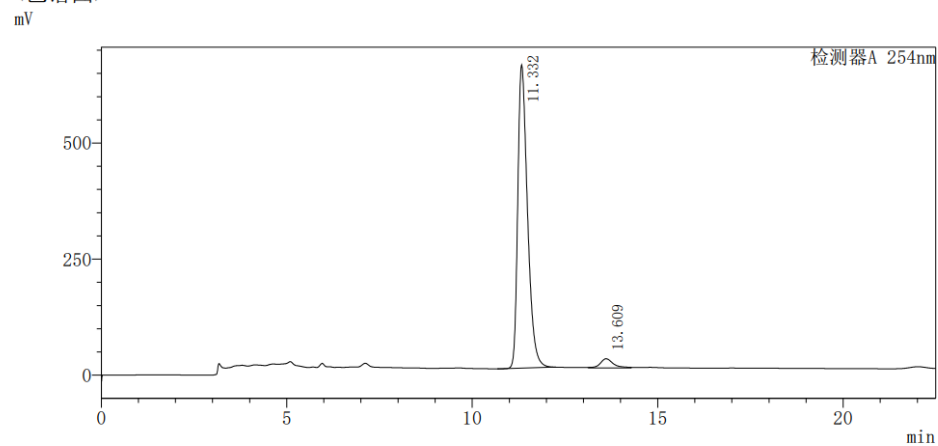

<峰表>

检测器A 254nm

| 峰号 | 保留时间   | 面积       | 高度     | 浓度     | 浓度单位 | 标记 | 化合物名 |
|----|--------|----------|--------|--------|------|----|------|
| 1  | 11.332 | 11915292 | 653388 | 95.971 |      | M  |      |
| 2  | 13.609 | 500176   | 19882  | 4.029  |      | M  |      |
| 总计 |        | 12415468 | 673270 |        |      |    |      |

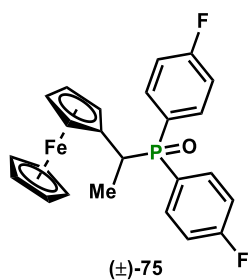

<色谱图>  
mV

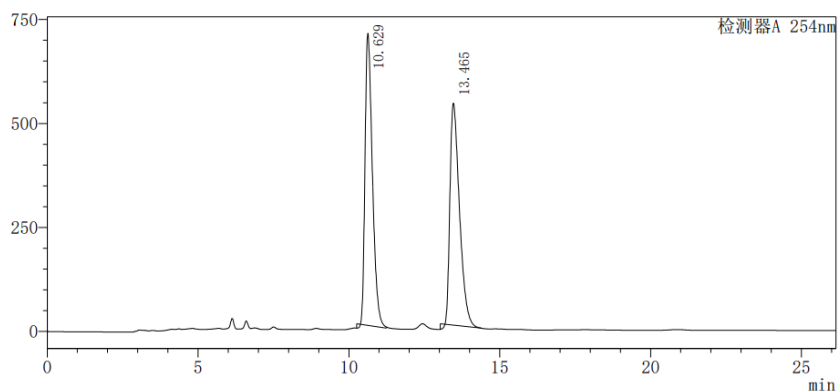

<峰表>

检测器A 254nm

| 峰号 | 保留时间   | 面积       | 高度      | 浓度     | 浓度单位 | 标记 | 化合物名 |
|----|--------|----------|---------|--------|------|----|------|
| 1  | 10.629 | 11855096 | 701494  | 50.465 |      | M  |      |
| 2  | 13.465 | 11636720 | 533199  | 49.535 |      | M  |      |
| 总计 |        | 23491816 | 1234693 |        |      |    |      |

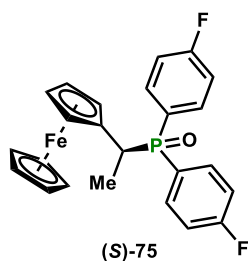

<色谱图>  
mV

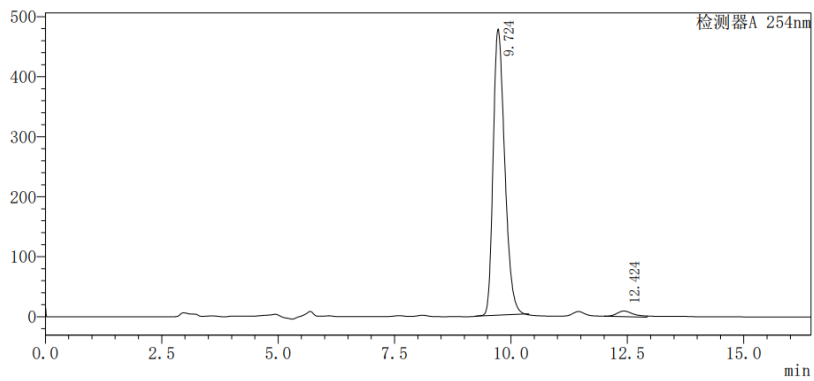

<峰表>

检测器A 254nm

| 峰号 | 保留时间   | 面积      | 高度     | 浓度     | 浓度单位 | 标记 | 化合物名 |
|----|--------|---------|--------|--------|------|----|------|
| 1  | 9.724  | 8242120 | 476510 | 97.205 |      | M  |      |
| 2  | 12.424 | 236992  | 9339   | 2.795  |      | M  |      |
| 总计 |        | 8479112 | 485849 |        |      |    |      |

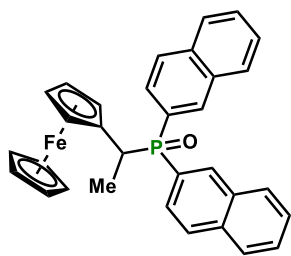

(±)-76

<色谱图>

mV

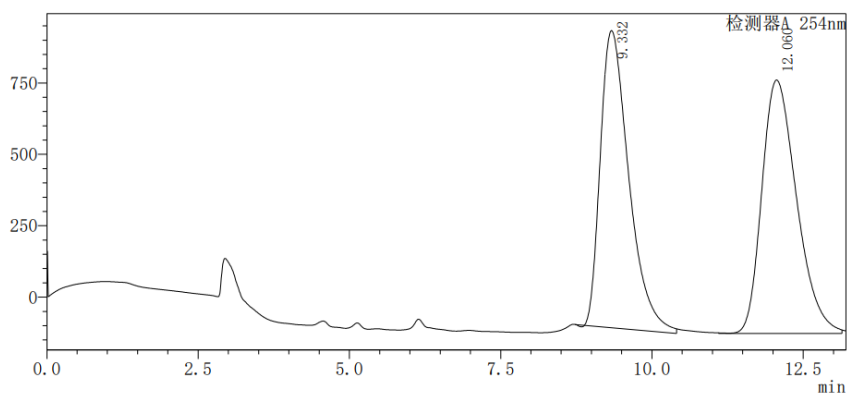

<峰表>

检测器A 254nm

| 峰号 | 保留时间   | 面积       | 高度      | 浓度     | 浓度单位 | 标记 | 化合物名 |
|----|--------|----------|---------|--------|------|----|------|
| 1  | 9.332  | 34129841 | 1041224 | 49.019 |      | M  |      |
| 2  | 12.060 | 35495771 | 888095  | 50.981 |      | M  |      |
| 总计 |        | 69625611 | 1929319 |        |      |    |      |

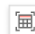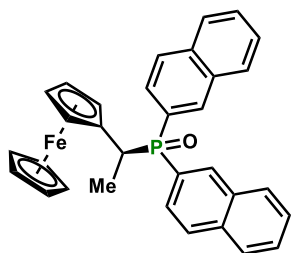

(S)-76

<色谱图>

mV

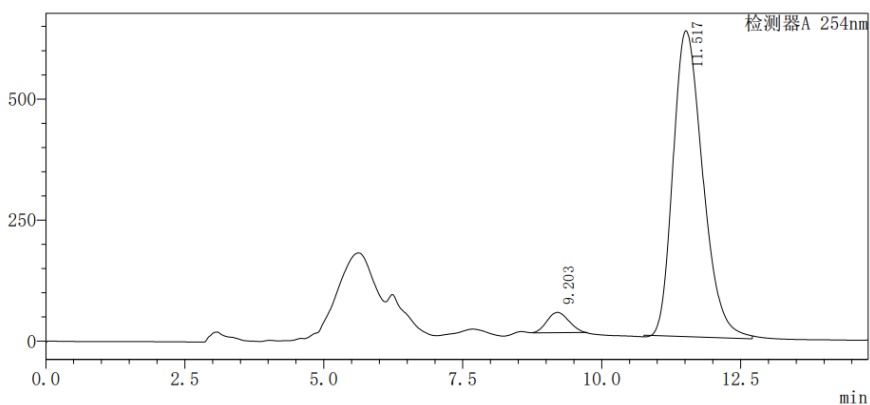

<峰表>

检测器A 254nm

| 峰号 | 保留时间   | 面积       | 高度     | 浓度     | 浓度单位 | 标记 | 化合物名 |
|----|--------|----------|--------|--------|------|----|------|
| 1  | 9.203  | 1152983  | 42057  | 4.669  |      | M  |      |
| 2  | 11.517 | 23539594 | 631932 | 95.331 |      | M  |      |
| 总计 |        | 24692577 | 673989 |        |      |    |      |

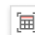

## 9. $^1\text{H}$ , $^{13}\text{C}$ , $^{19}\text{F}$ and $^{31}\text{P}$ NMR Spectra of Products

### (*S*)-phenyl(ferrocene-2-yl)methanol (S2)

$^1\text{H}$  NMR (400 MHz,  $\text{CDCl}_3$ )

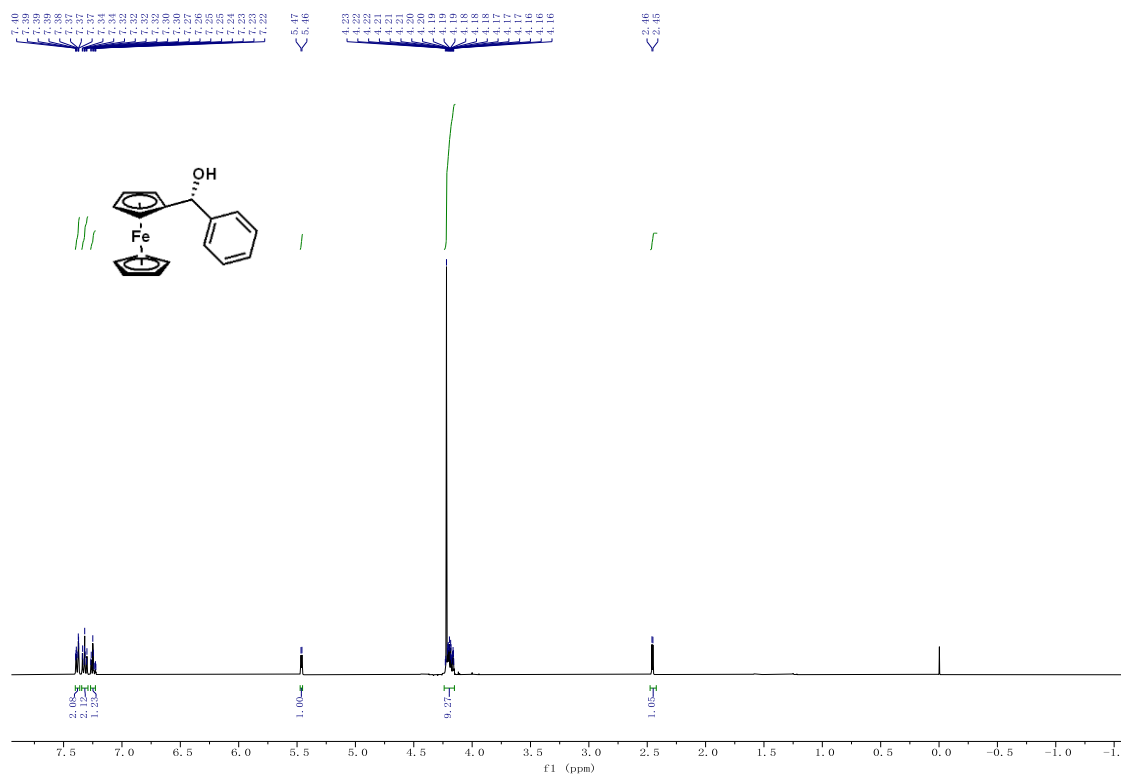

$^{13}\text{C}$  NMR (101 MHz,  $\text{CDCl}_3$ )

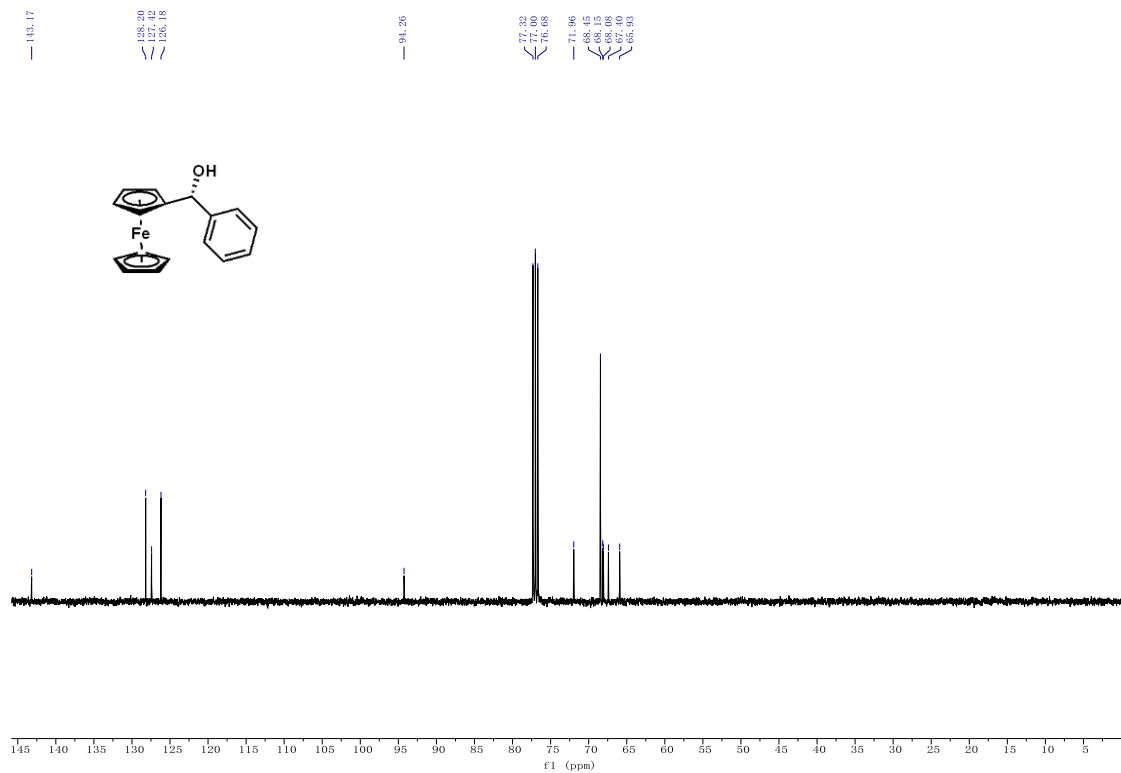

# (S)-ferrocene-2-yl(4-(trifluoromethyl)phenyl)methanol (S3)

$^1\text{H}$  NMR (400 MHz,  $\text{CDCl}_3$ )

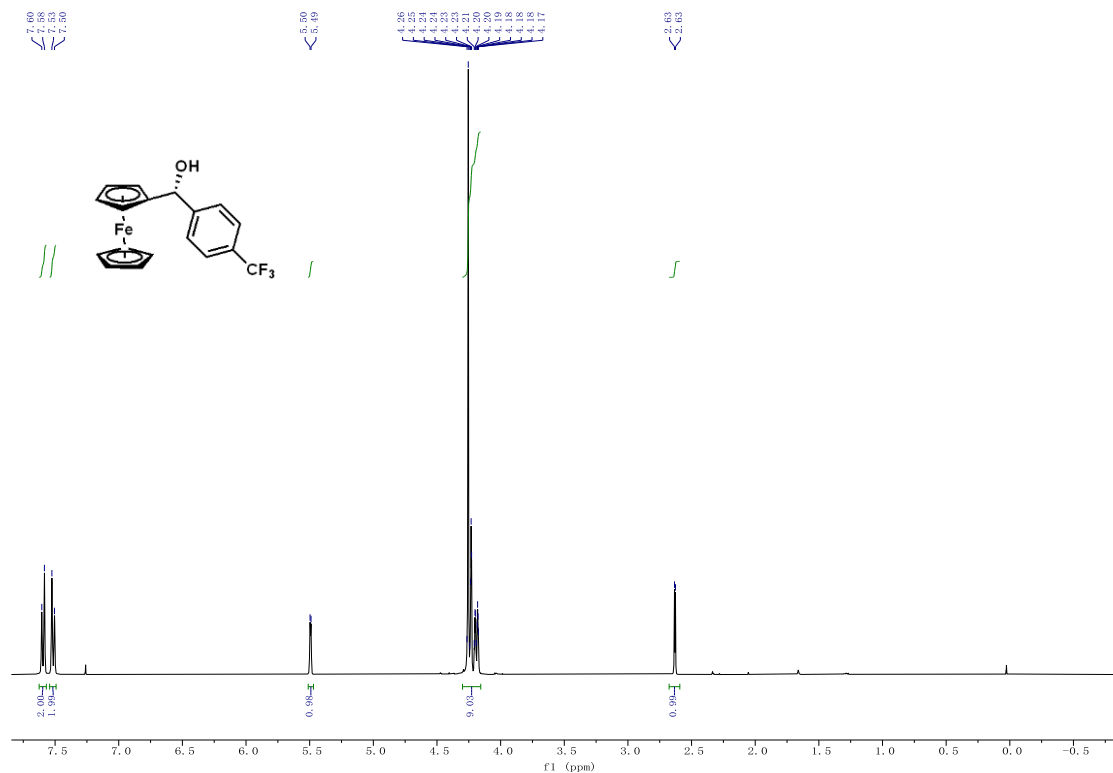

$^{13}\text{C}$  NMR (101 MHz,  $\text{CDCl}_3$ )

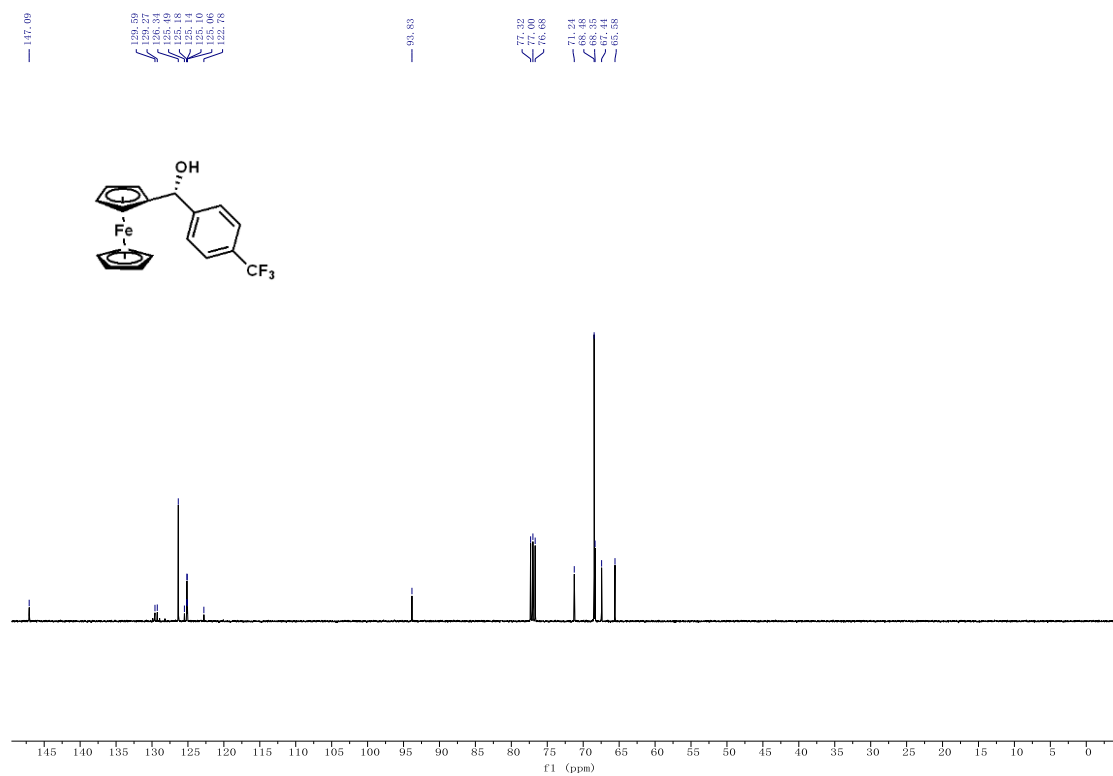

**<sup>19</sup>F NMR (376 MHz, CDCl<sub>3</sub>)**

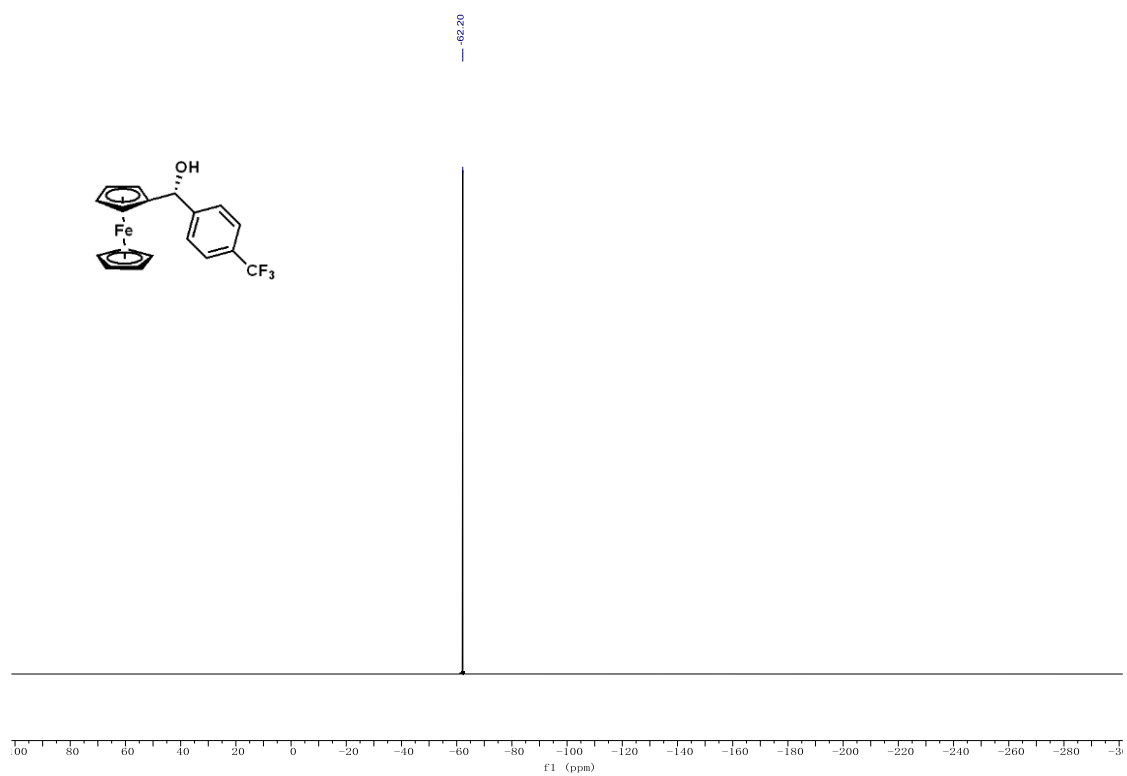

# (S)-(4-fluorophenyl)(ferrocene-2-yl)methanol (S4)

$^1\text{H}$  NMR (400 MHz,  $\text{CDCl}_3$ )

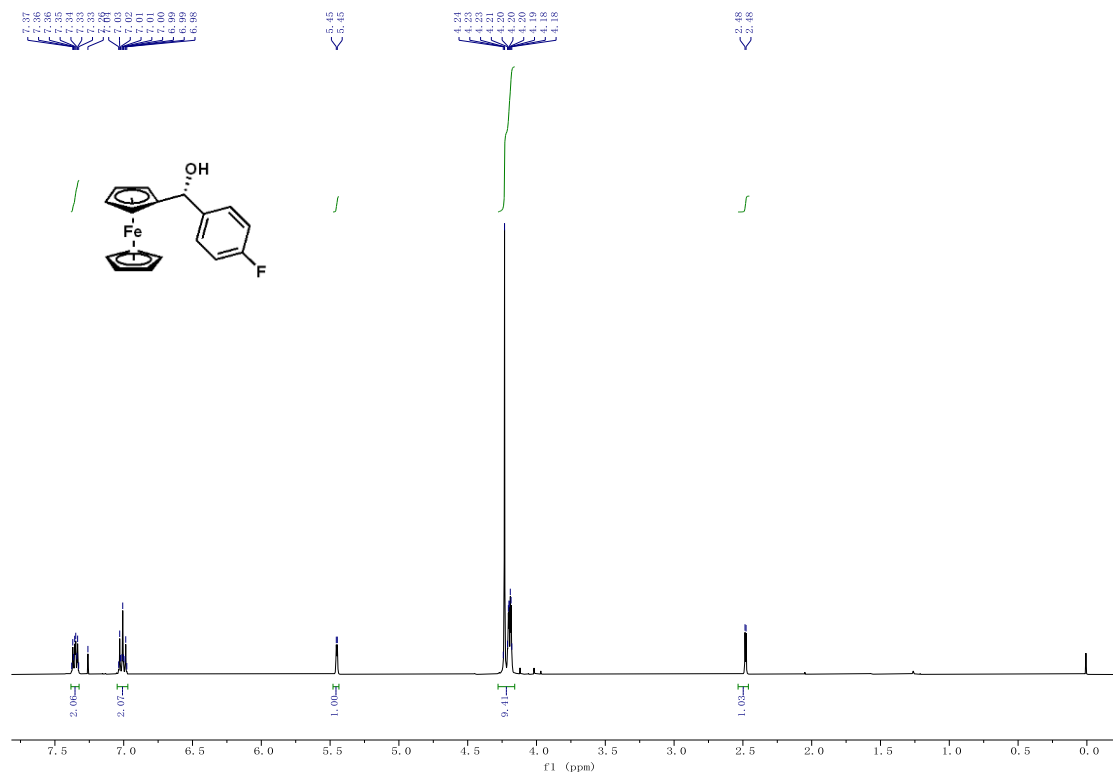

$^{13}\text{C}$  NMR (101 MHz,  $\text{CDCl}_3$ )

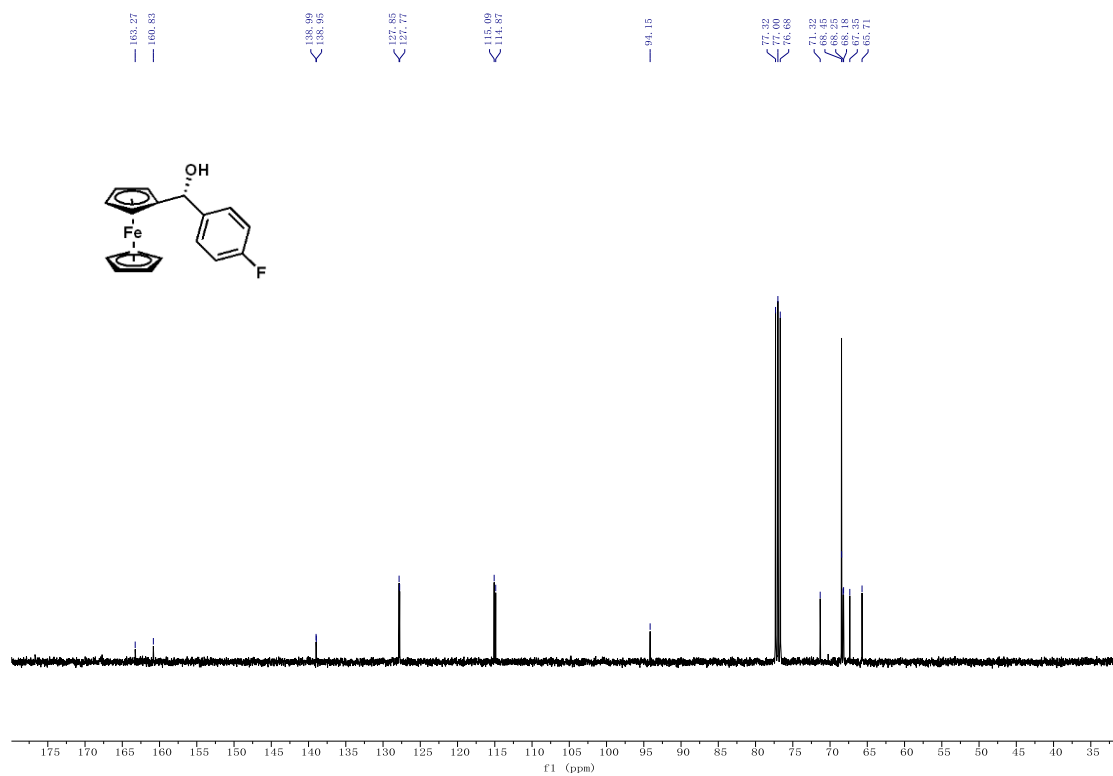

**<sup>19</sup>F NMR (376 MHz, CDCl<sub>3</sub>)**

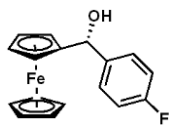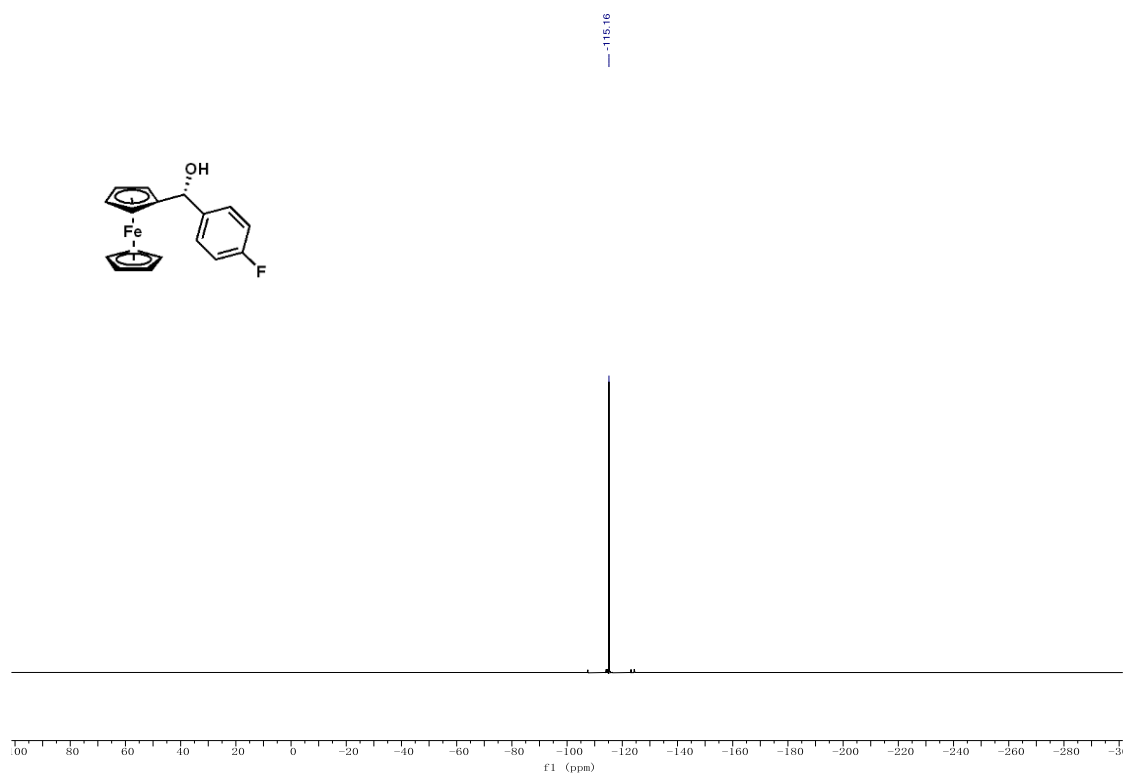

# (S)-1-(ferrocene-2-yl)propan-1-ol (S5)

$^1\text{H}$  NMR (400 MHz,  $\text{CDCl}_3$ )

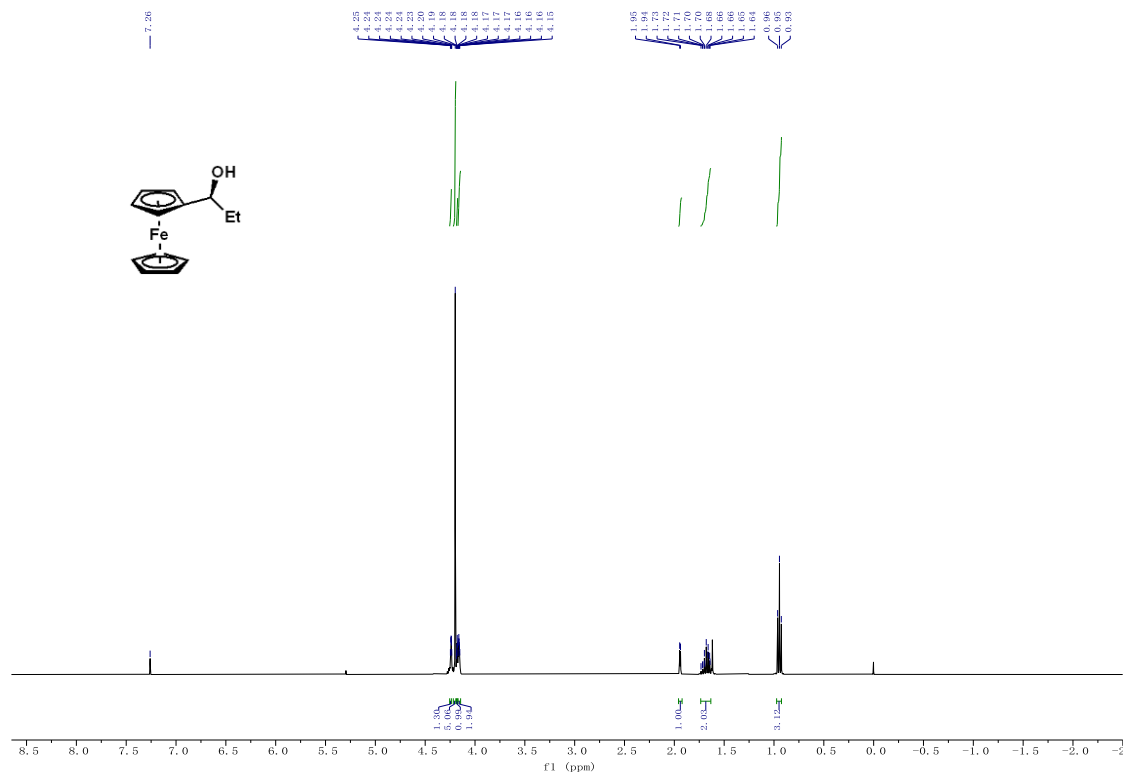

$^{13}\text{C}$  NMR (101 MHz,  $\text{CDCl}_3$ )

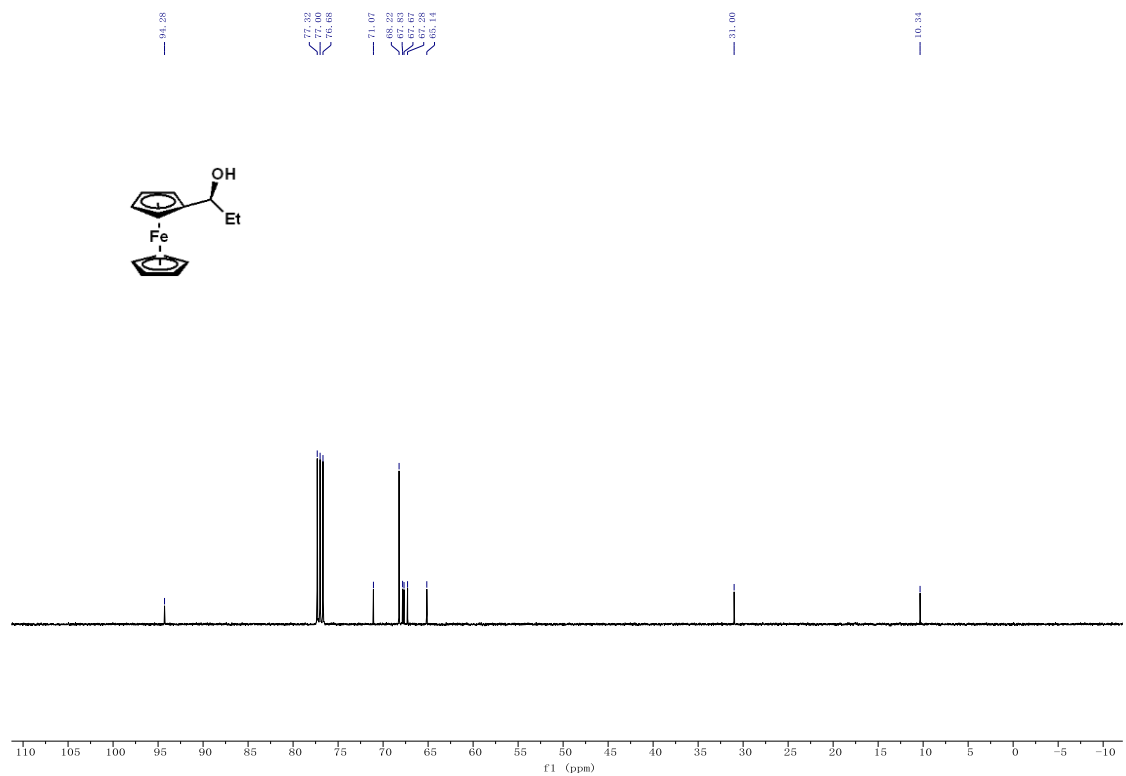

# (S)-1-(ferrocene-2-yl)butan-1-ol (S6)

<sup>1</sup>H NMR (400 MHz, CDCl<sub>3</sub>)

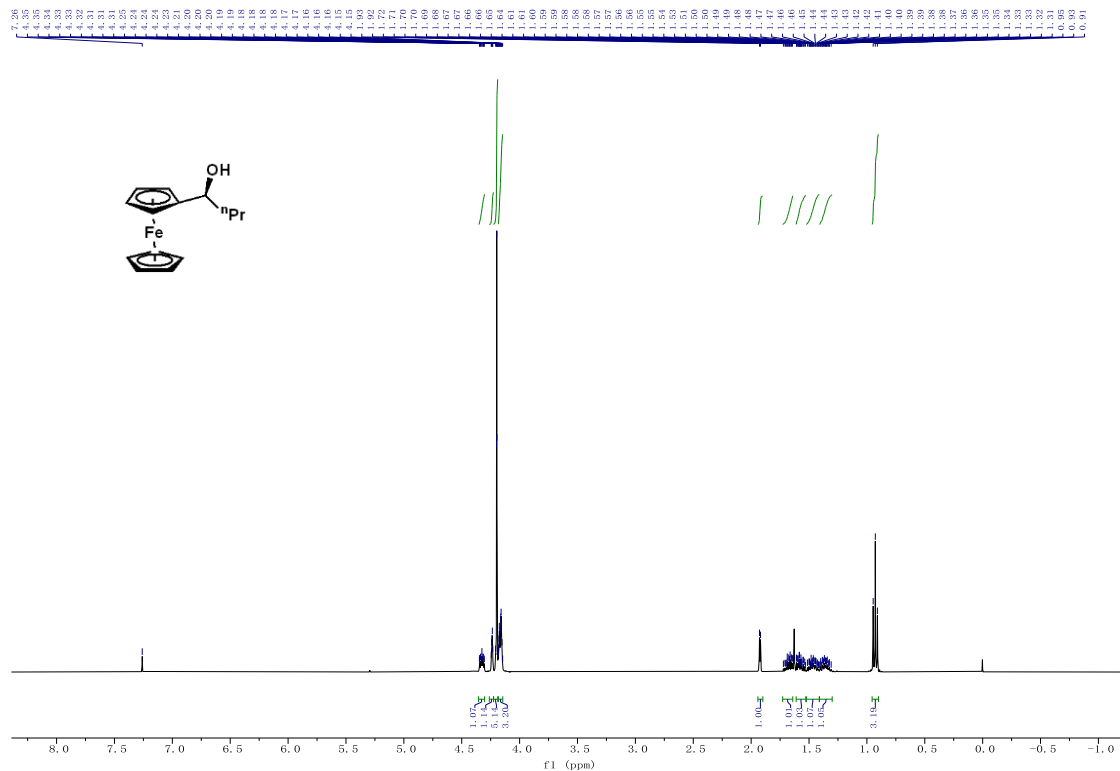

<sup>13</sup>C NMR (101 MHz, CDCl<sub>3</sub>)

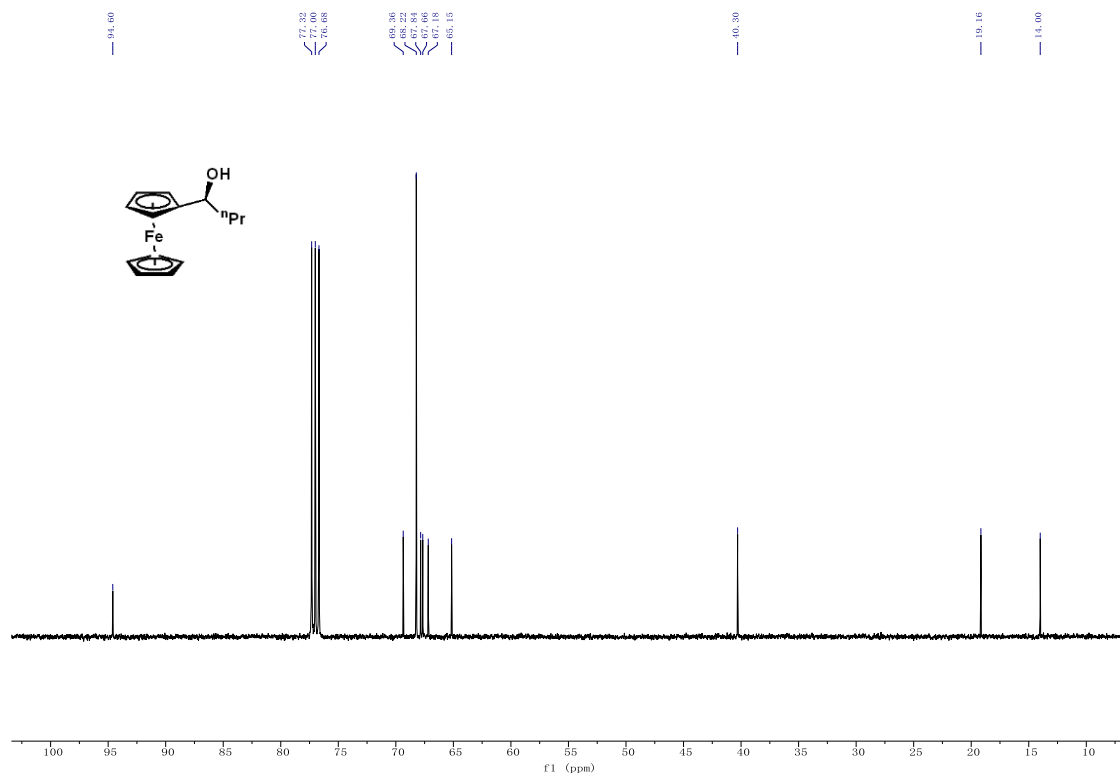

# (S)-1-phenyl-2-(ferrocene-2-yl)ethan-1-ol (S7)

<sup>1</sup>H NMR (400 MHz, CDCl<sub>3</sub>)

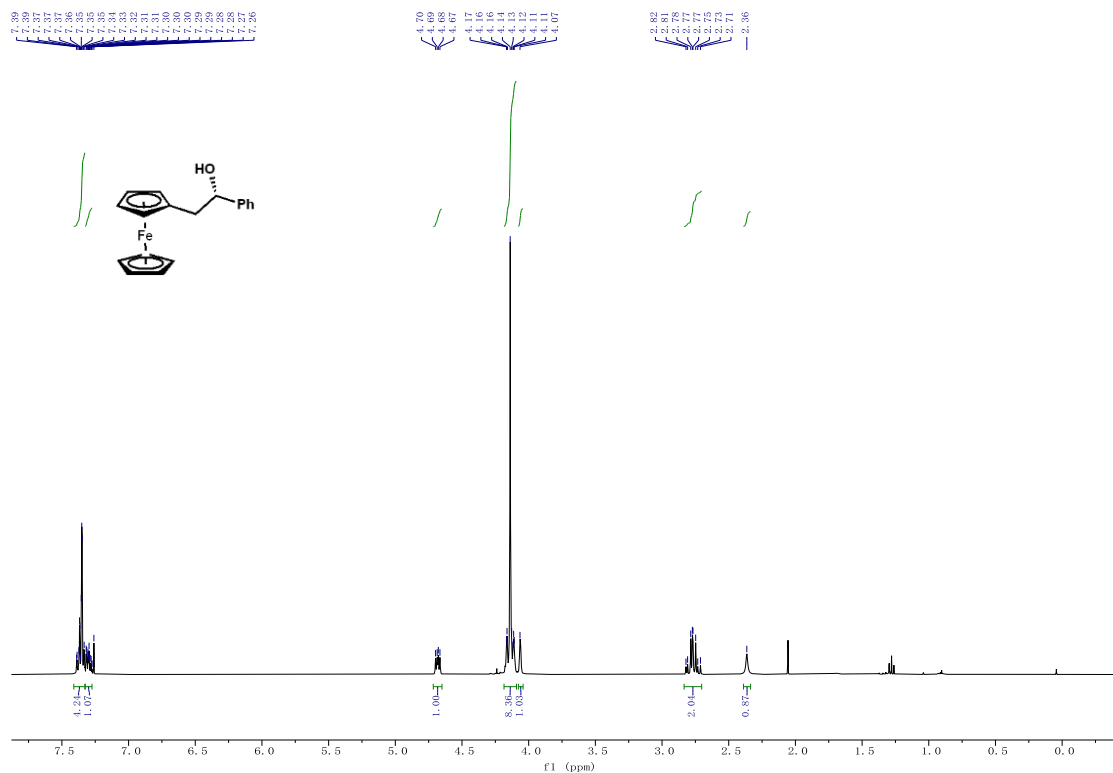

<sup>13</sup>C NMR (101 MHz, CDCl<sub>3</sub>)

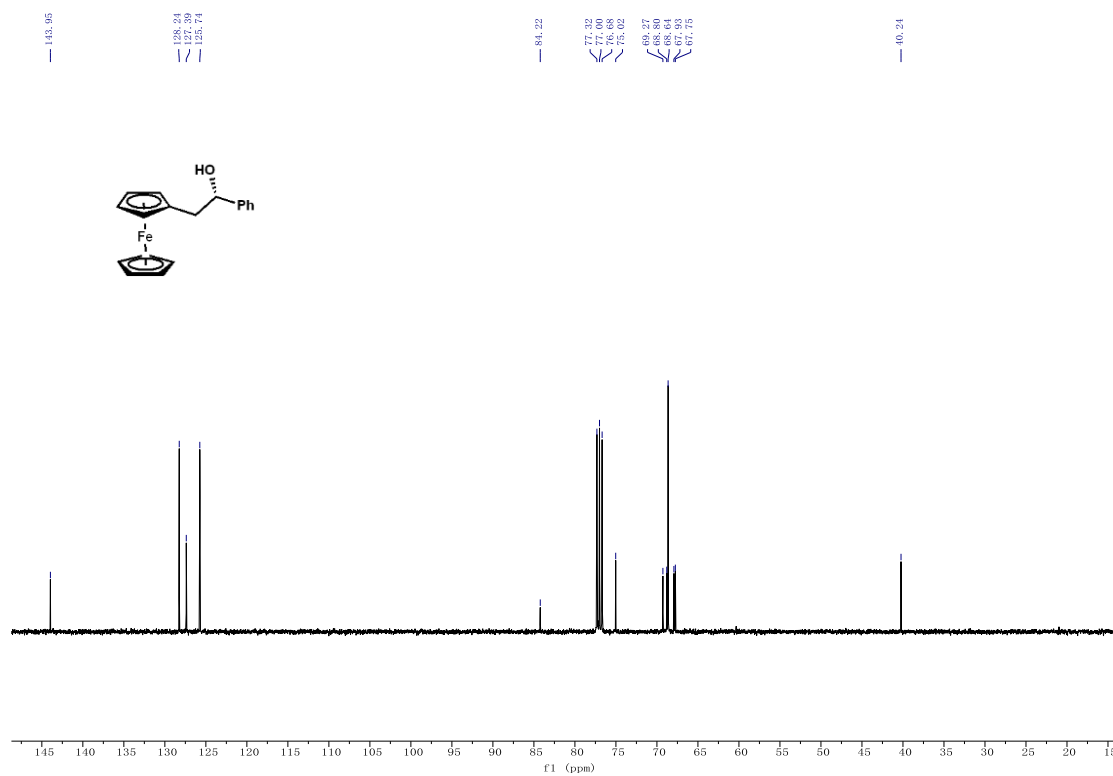



# (S)-1-(1-Hydroxyethyl)-1'-ethylferrocene (S9)

$^1\text{H}$  NMR (400 MHz,  $\text{CDCl}_3$ )

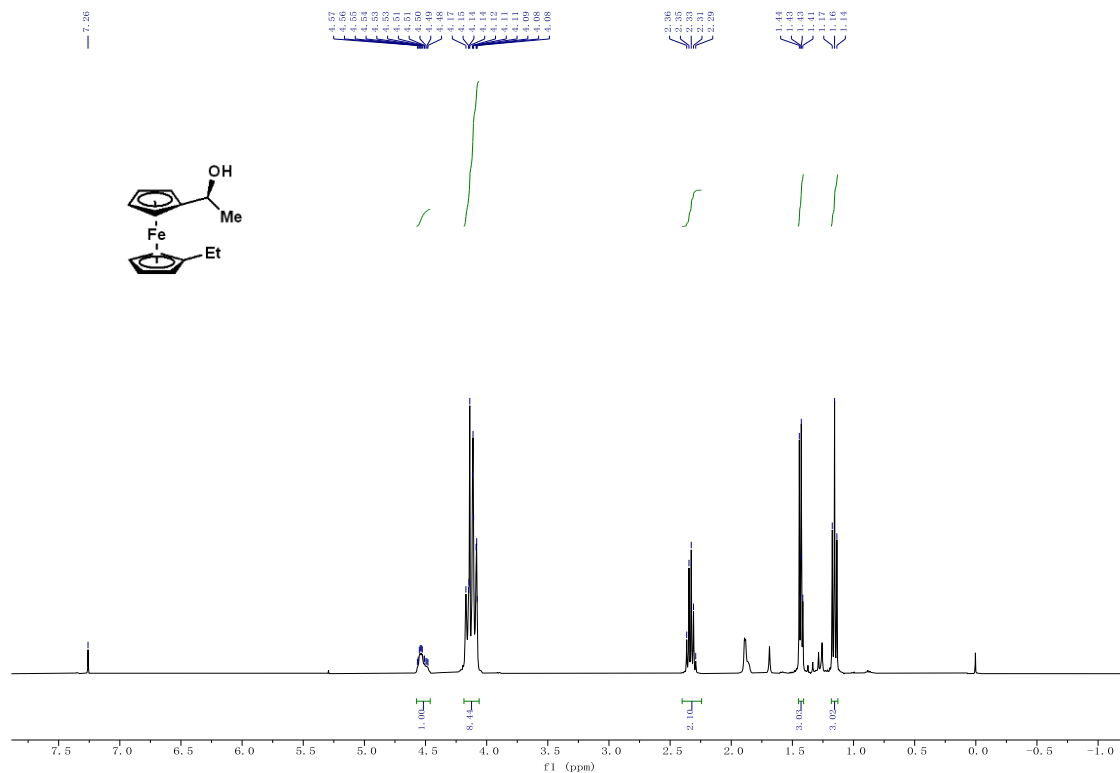

$^{13}\text{C}$  NMR (101 MHz,  $\text{CDCl}_3$ )

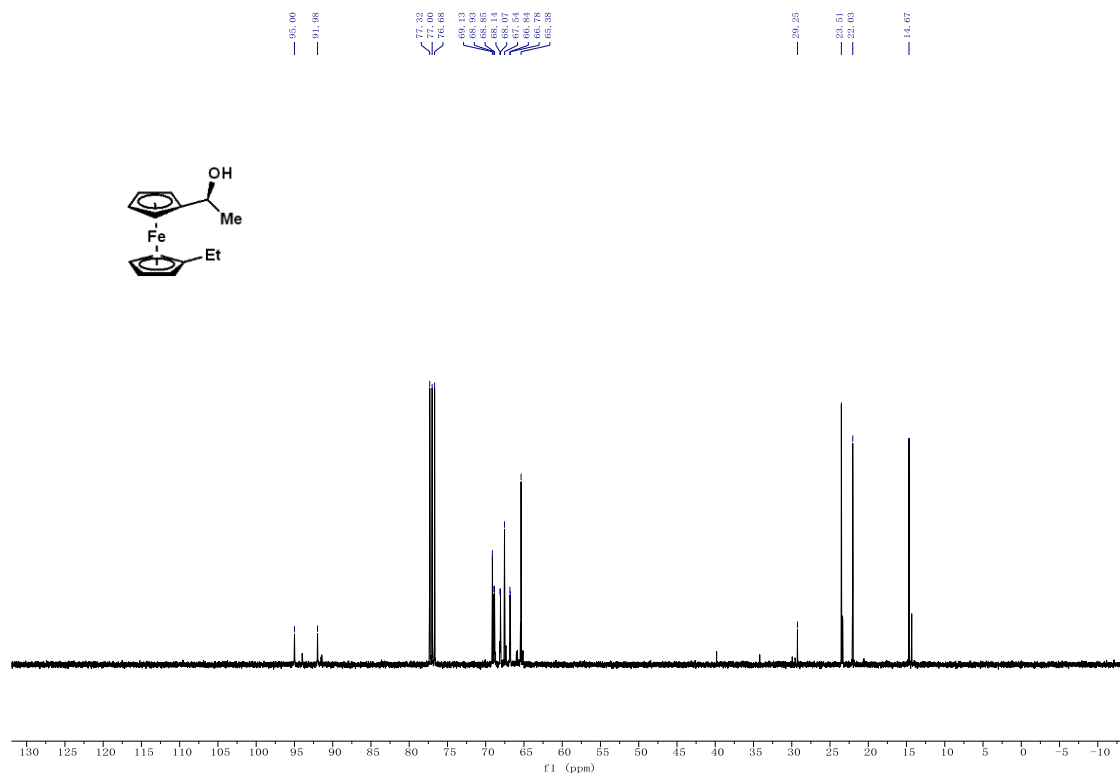

# (S)-1-(ruthenocene-2-yl)ethan-1-ol (S12)

<sup>1</sup>H NMR (400 MHz, CDCl<sub>3</sub>)

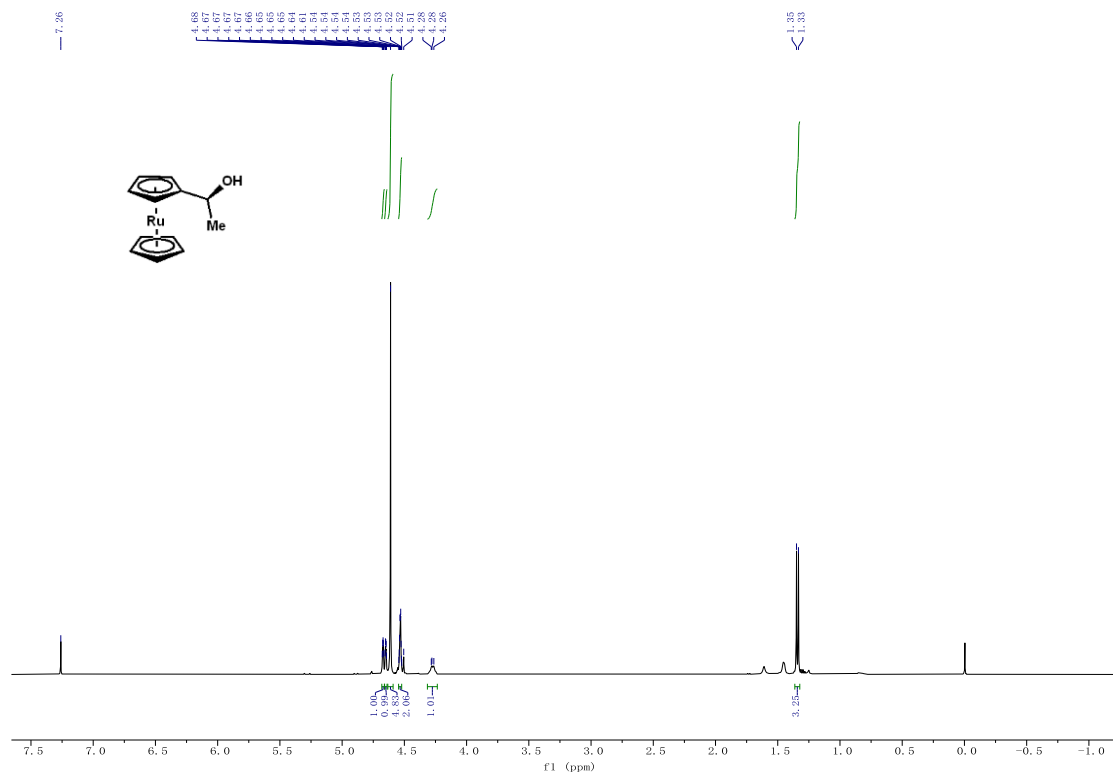

<sup>13</sup>C NMR (101 MHz, CDCl<sub>3</sub>)

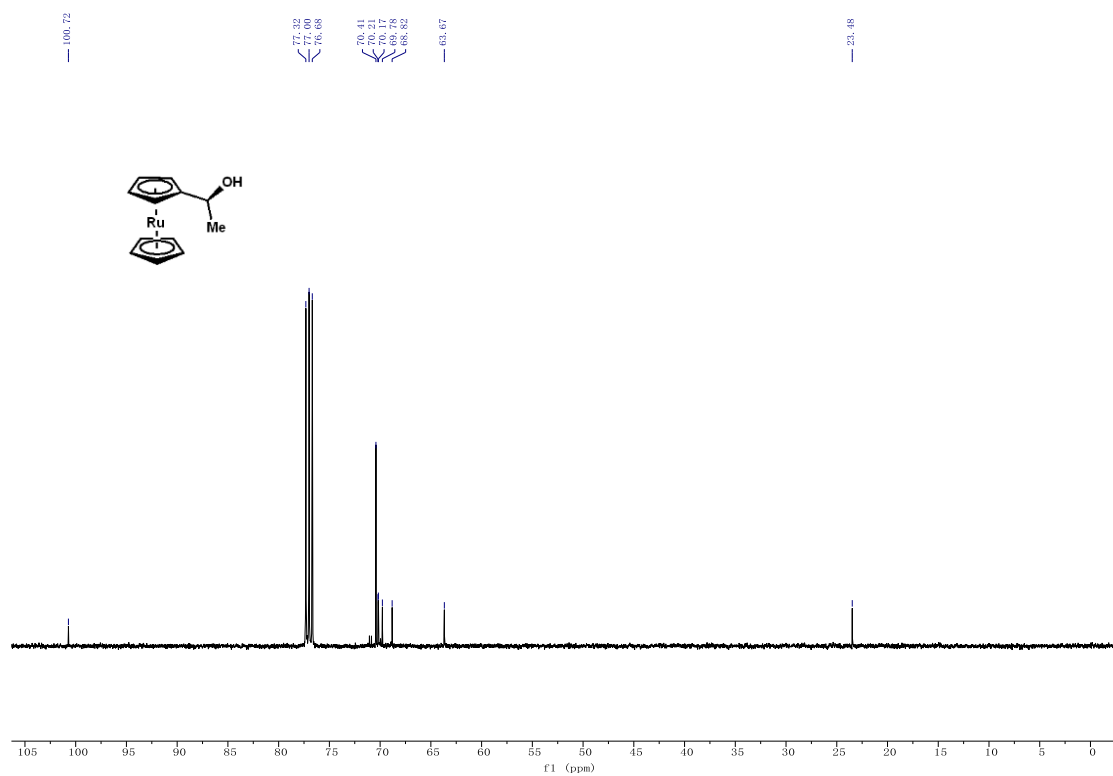

### (S) -1-(benzylthio)ethylferrocene (3)

$^1\text{H}$  NMR (400 MHz,  $\text{CDCl}_3$ )

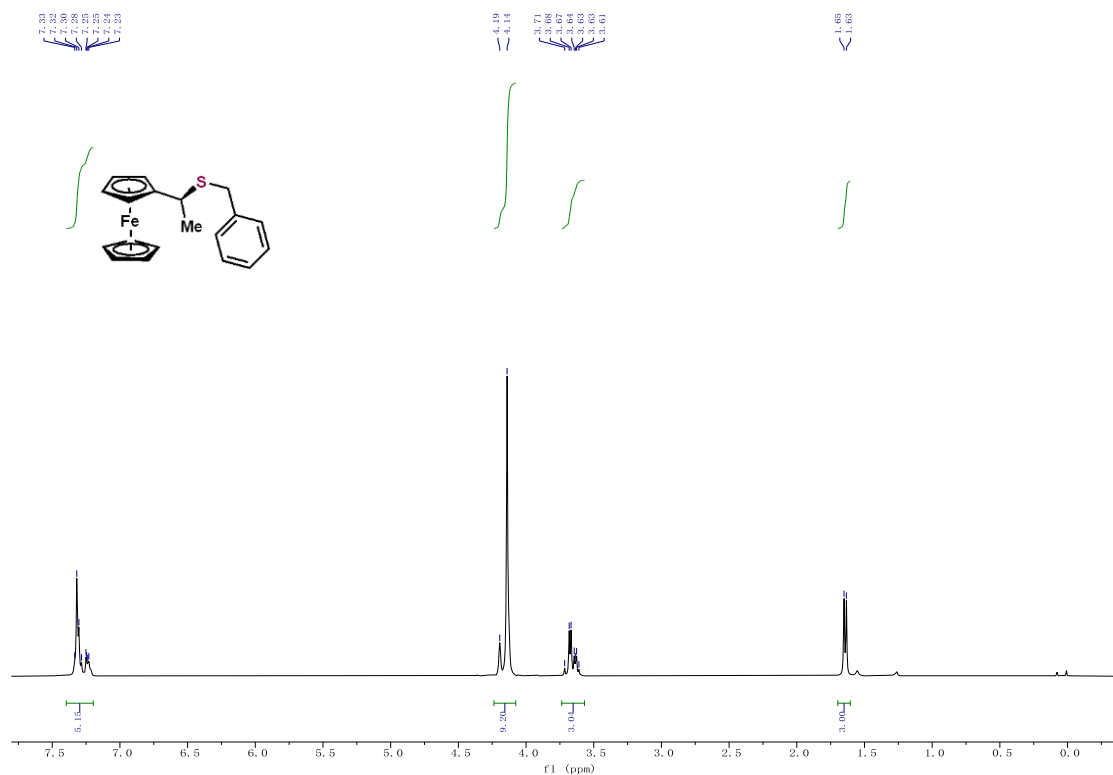

$^{13}\text{C}$  NMR (101 MHz,  $\text{CDCl}_3$ )

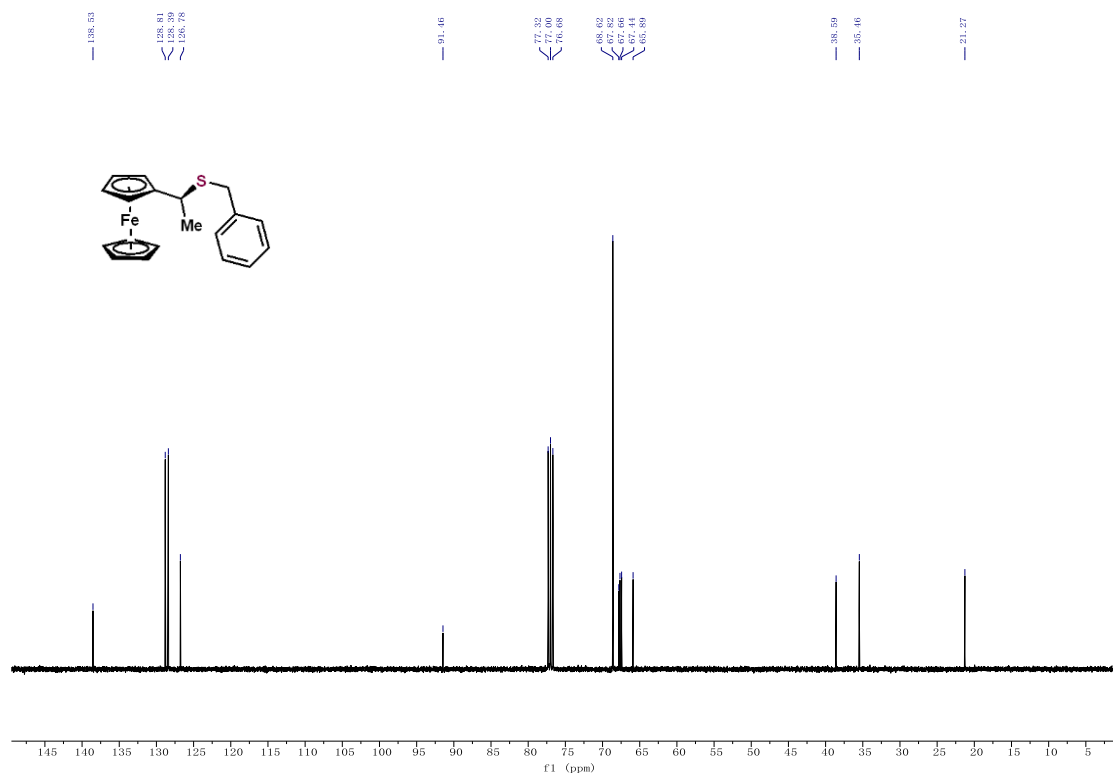

# (S)-1-((2-methylbenzyl)thio)ethylferrocene (4)

<sup>1</sup>H NMR (400 MHz, CDCl<sub>3</sub>)

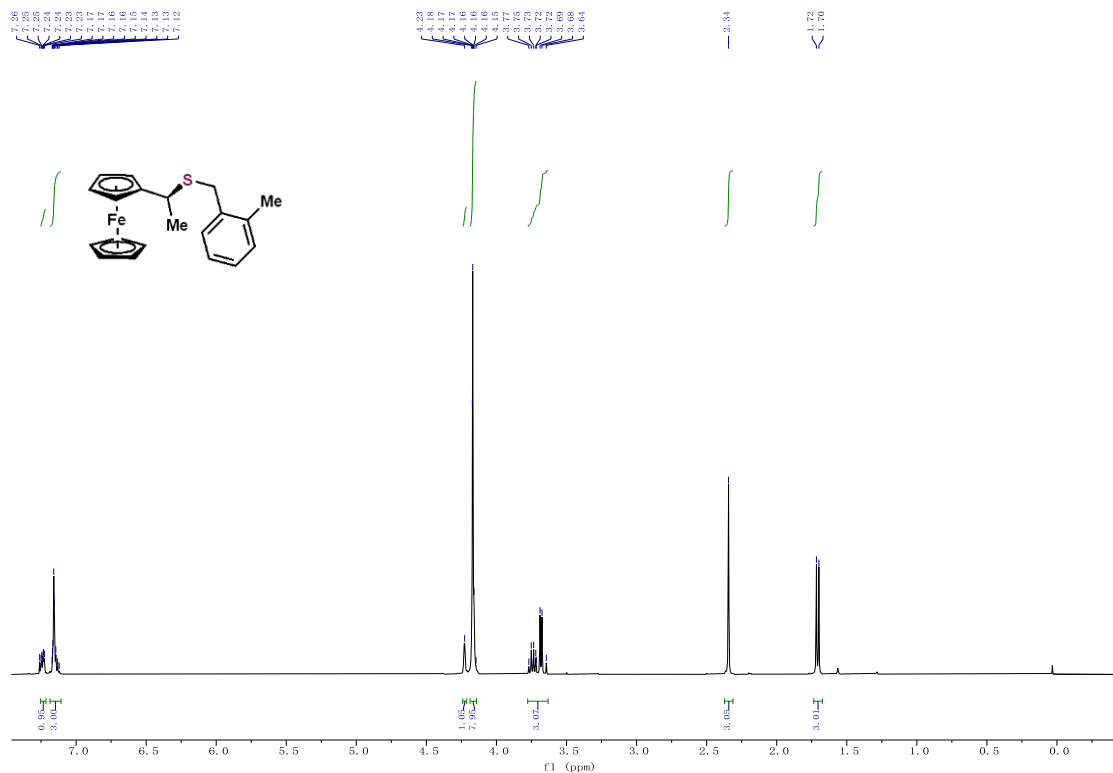

<sup>13</sup>C NMR (101 MHz, CDCl<sub>3</sub>)

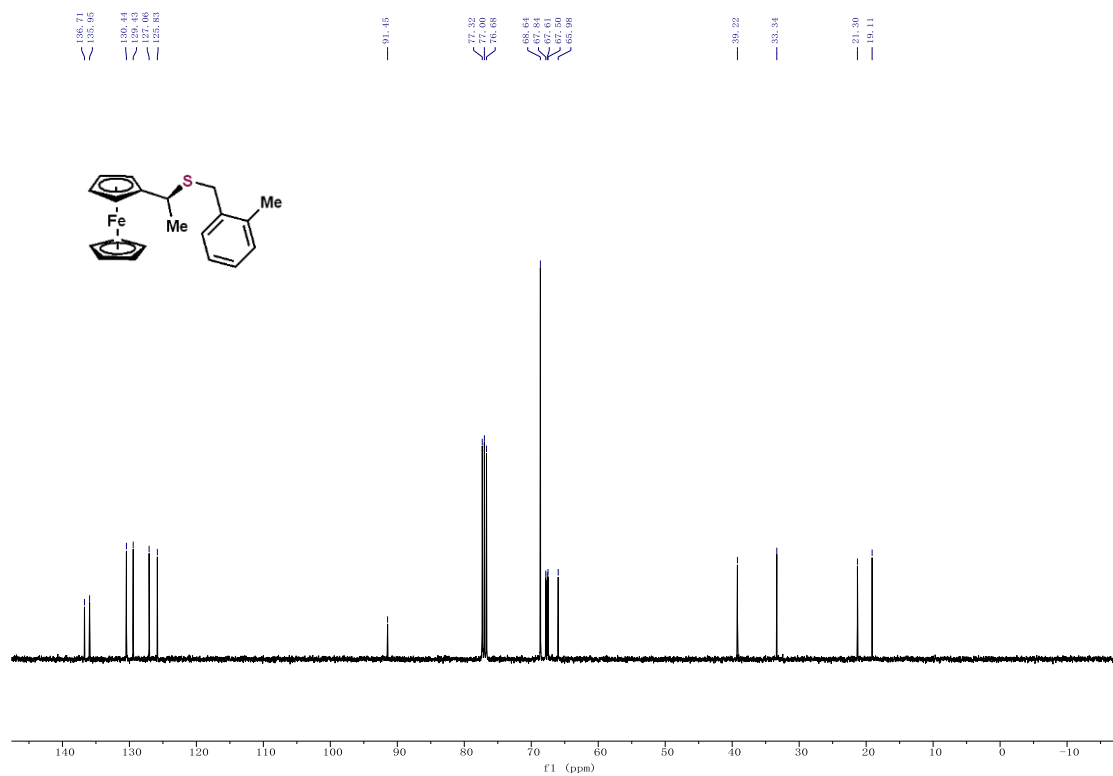

# (S)-1-((3-methylbenzyl)thio)ethylferrocene (5)

<sup>1</sup>H NMR (400 MHz, CDCl<sub>3</sub>)

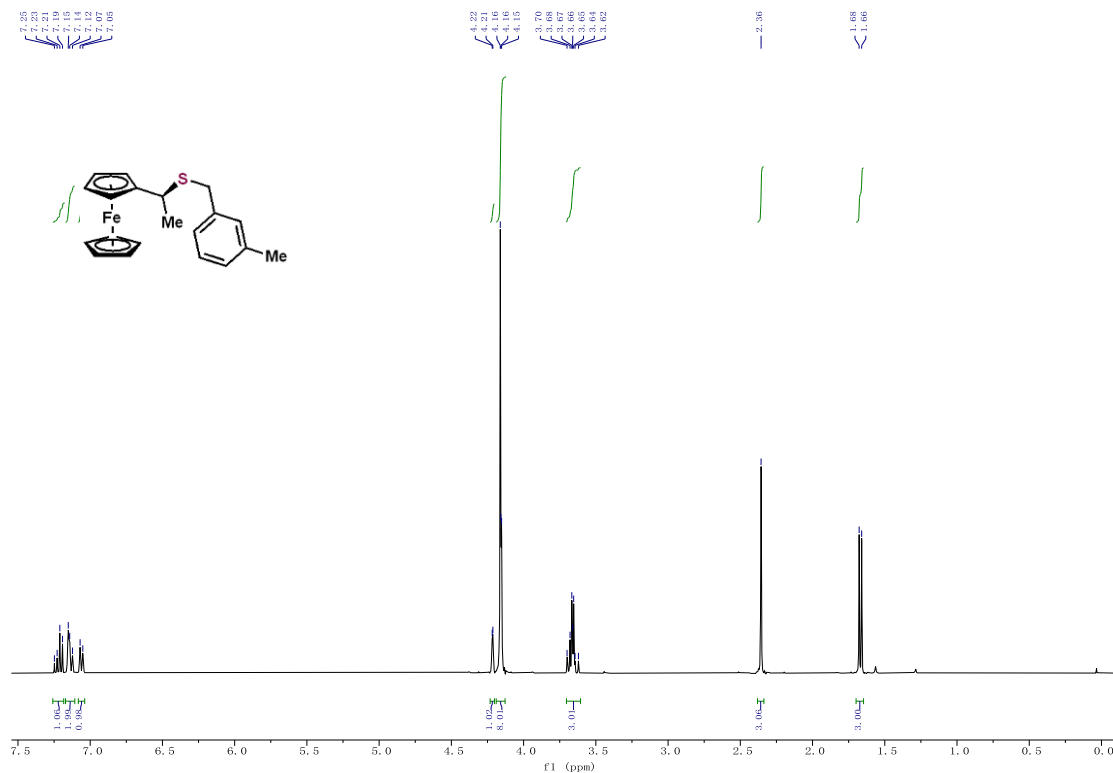

<sup>13</sup>C NMR (101 MHz, CDCl<sub>3</sub>)

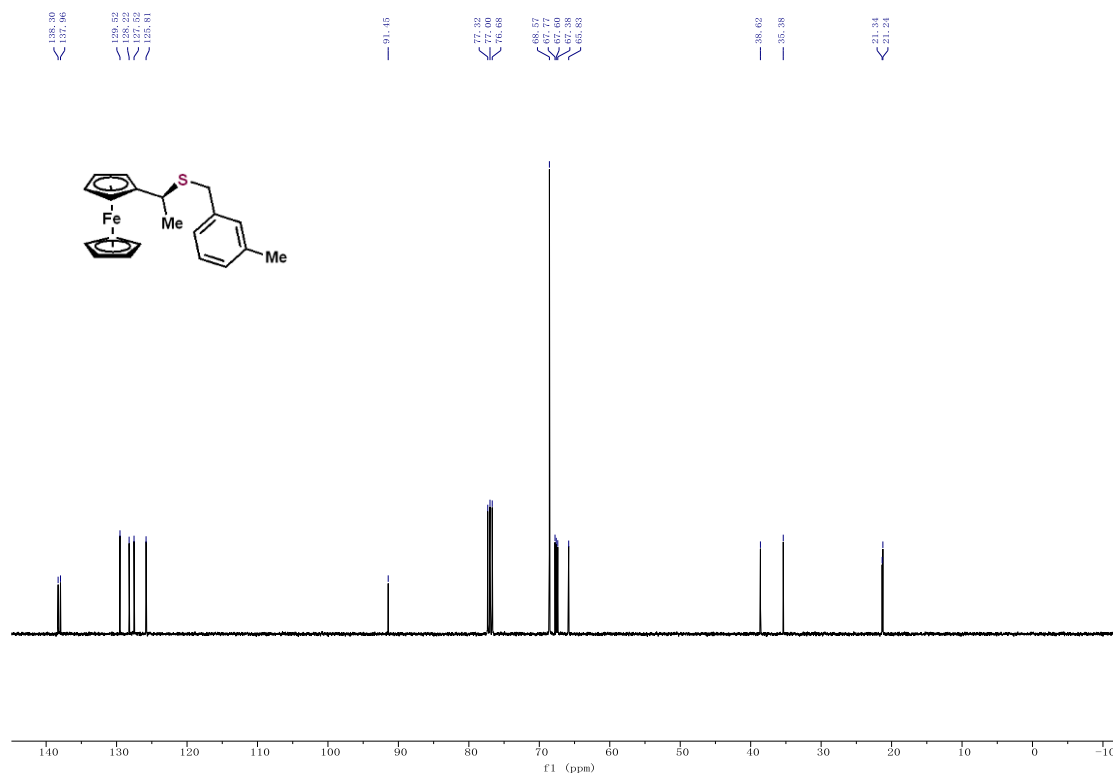

### (S)-1-((4-methylbenzyl)thio)ethylferrocene (6)

$^1\text{H}$  NMR (400 MHz,  $\text{CDCl}_3$ )

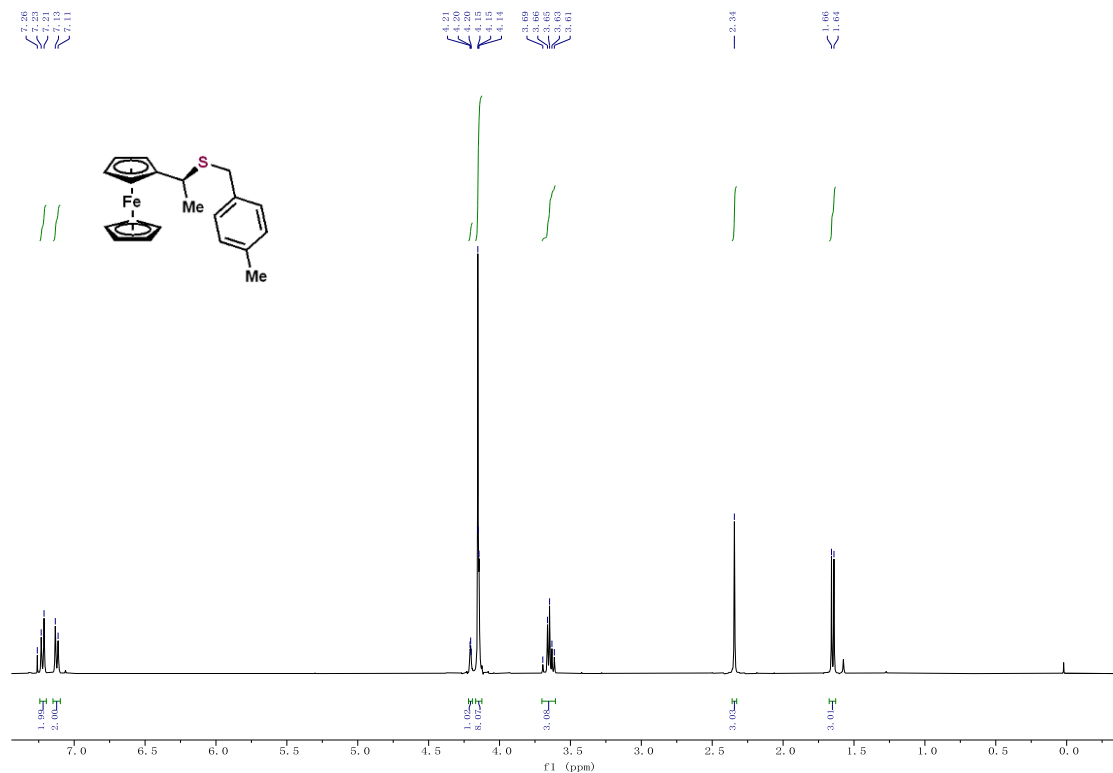

$^{13}\text{C}$  NMR (101 MHz,  $\text{CDCl}_3$ )

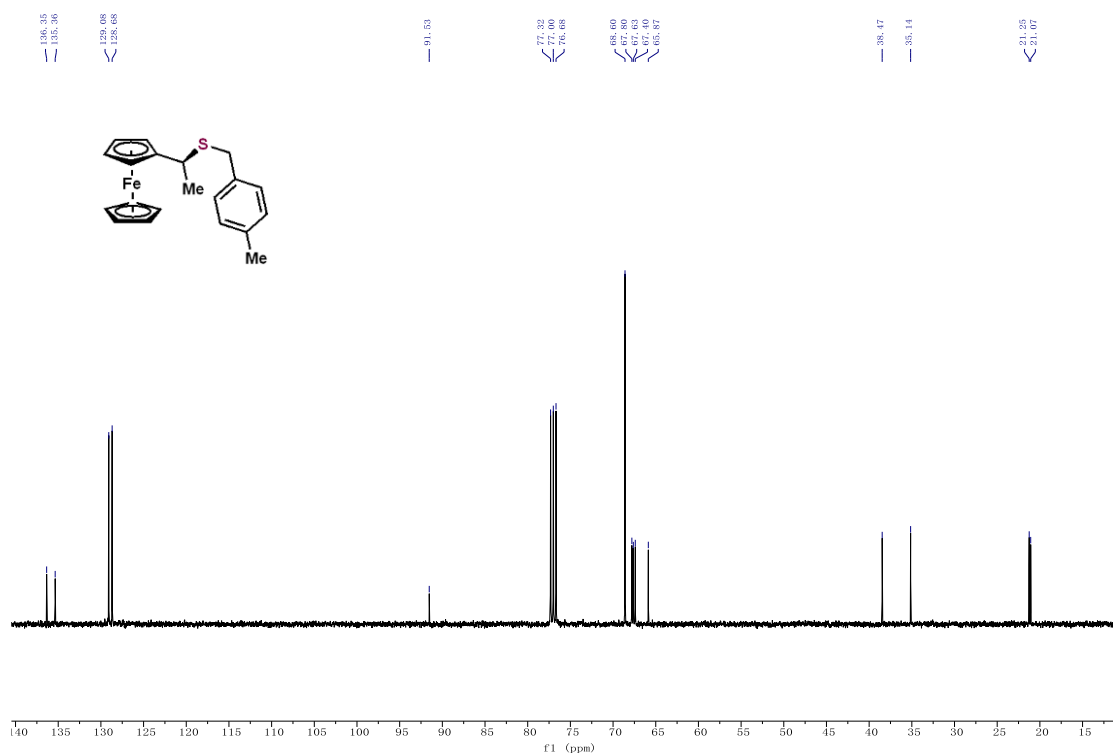

# (S)-1-((4-fluorobenzyl)thio)ethylferrocene (7)

$^1\text{H}$  NMR (400 MHz,  $\text{CDCl}_3$ )

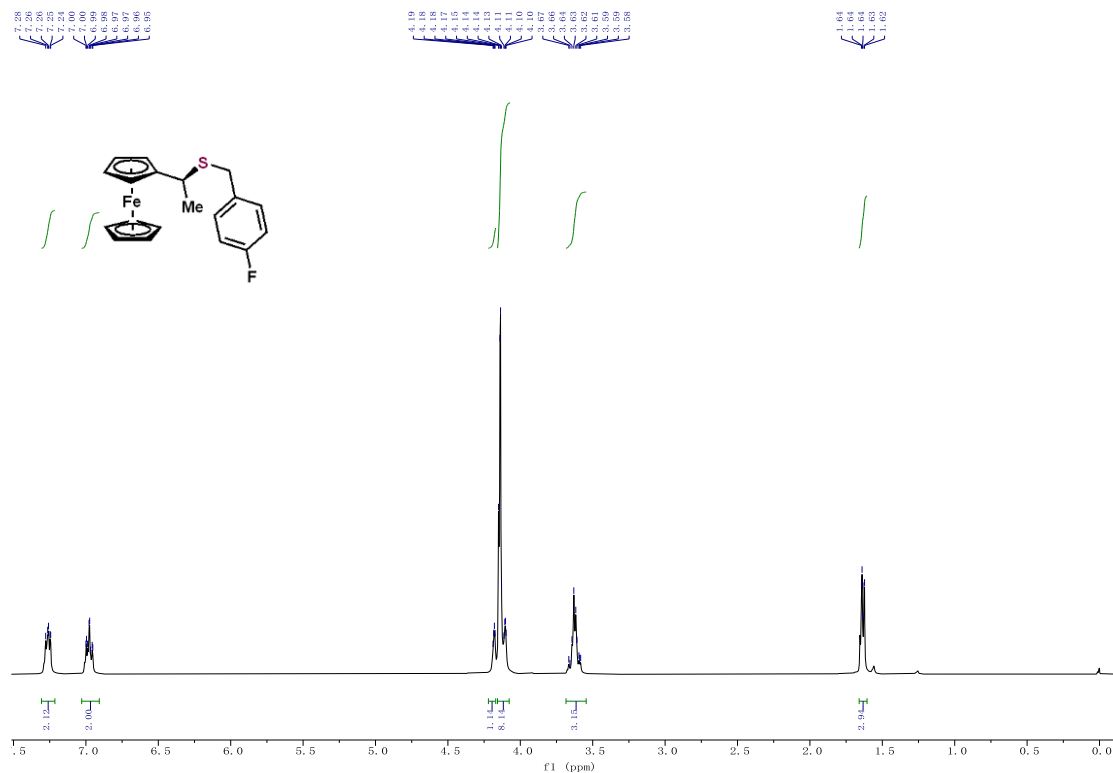

$^{13}\text{C}$  NMR (101 MHz,  $\text{CDCl}_3$ )

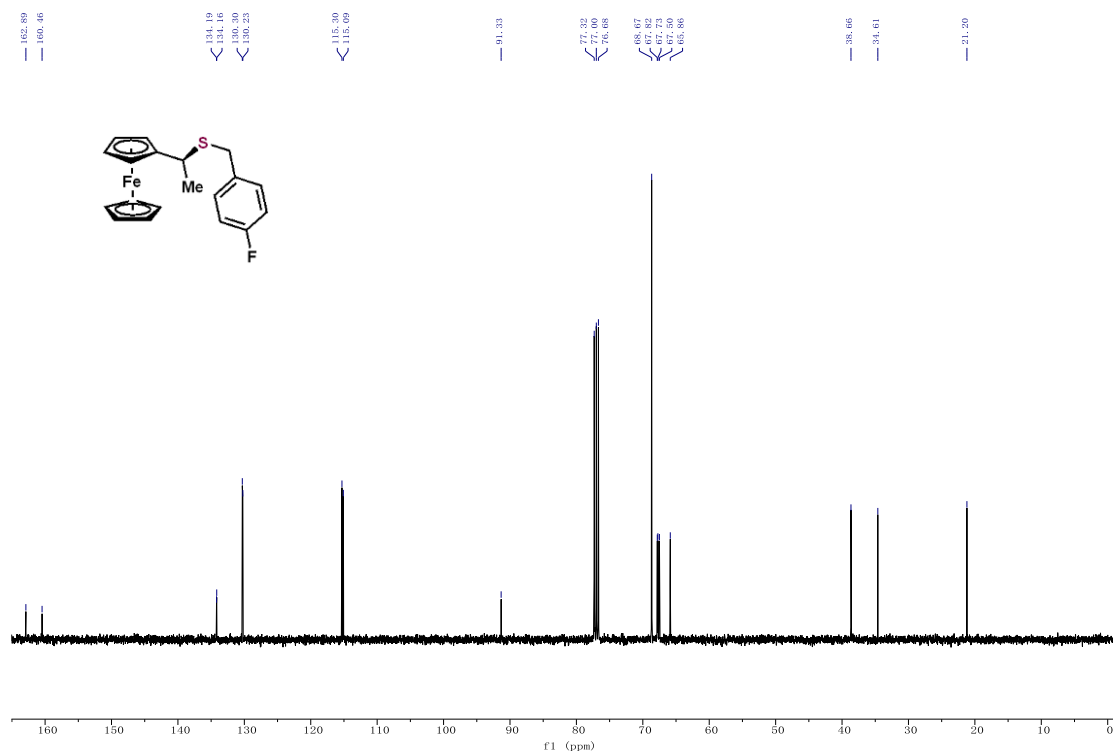

**<sup>19</sup>F NMR (376 MHz, CDCl<sub>3</sub>)**

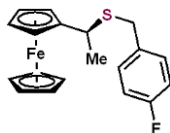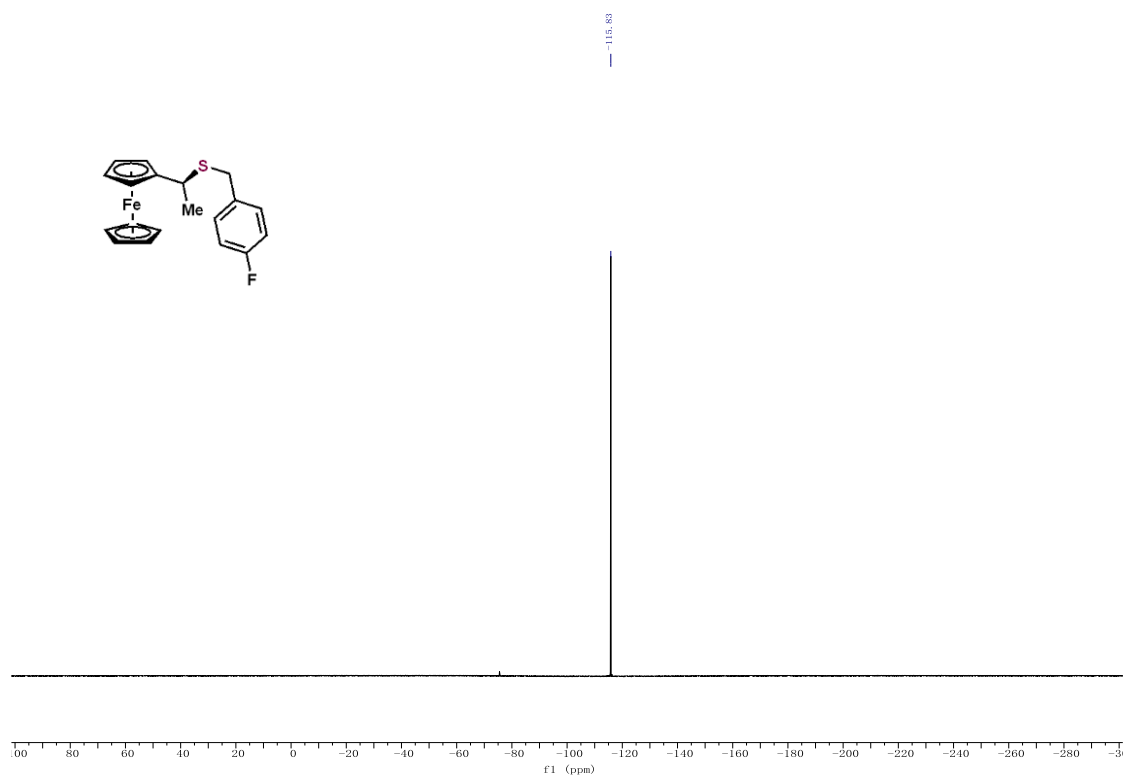

# (S)-1-((4-chlorobenzyl)thio)ethylferrocene (8)

$^1\text{H}$  NMR (400 MHz,  $\text{CDCl}_3$ )

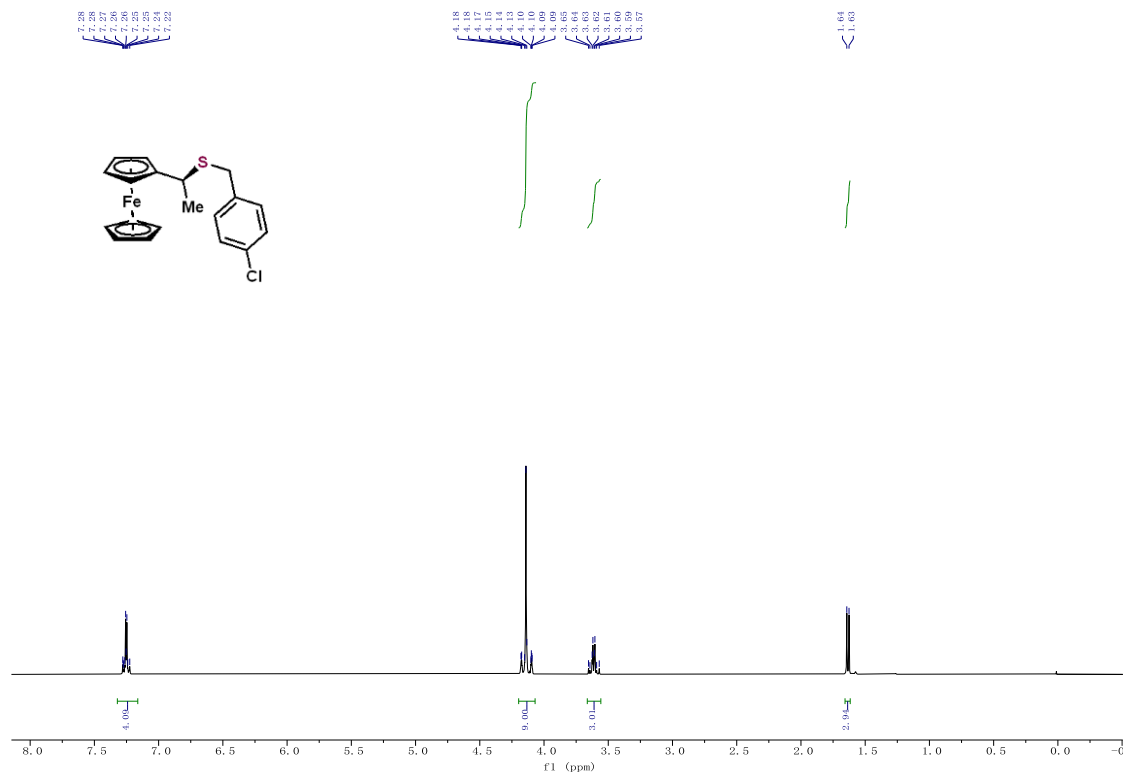

$^{13}\text{C}$  NMR (101 MHz,  $\text{CDCl}_3$ )

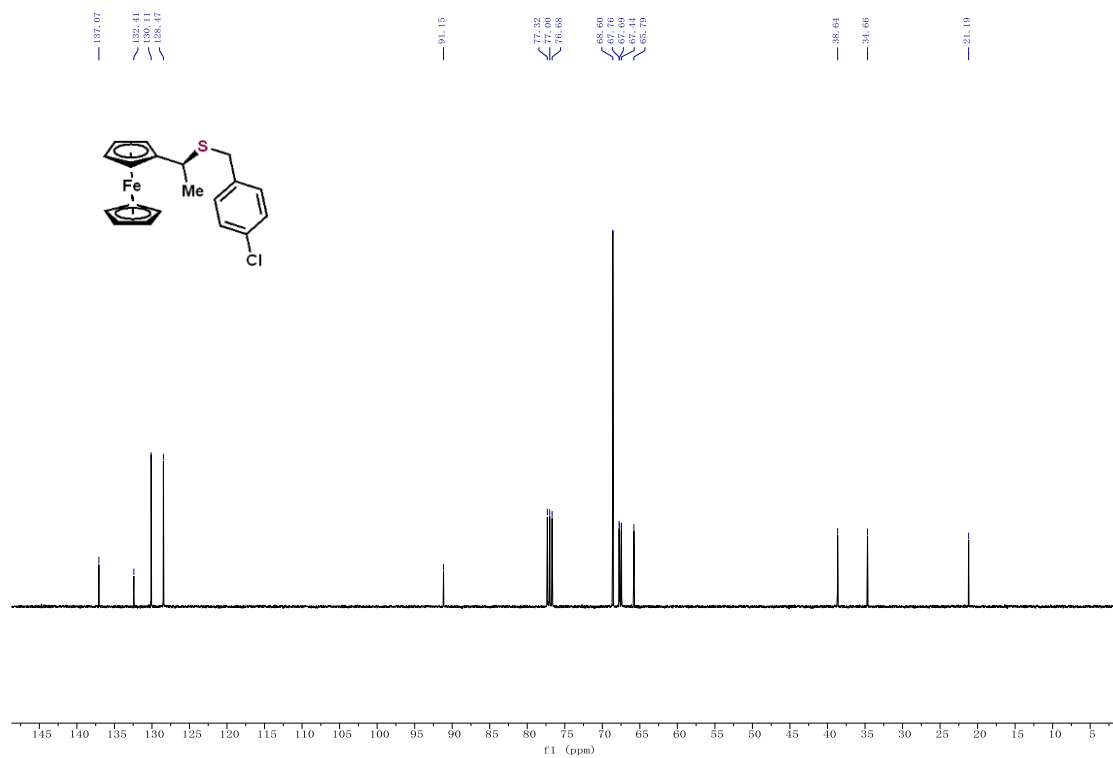

# (S)-1-((4-bromobenzyl)thio)ethylferrocene (9)

<sup>1</sup>H NMR (400 MHz, CDCl<sub>3</sub>)

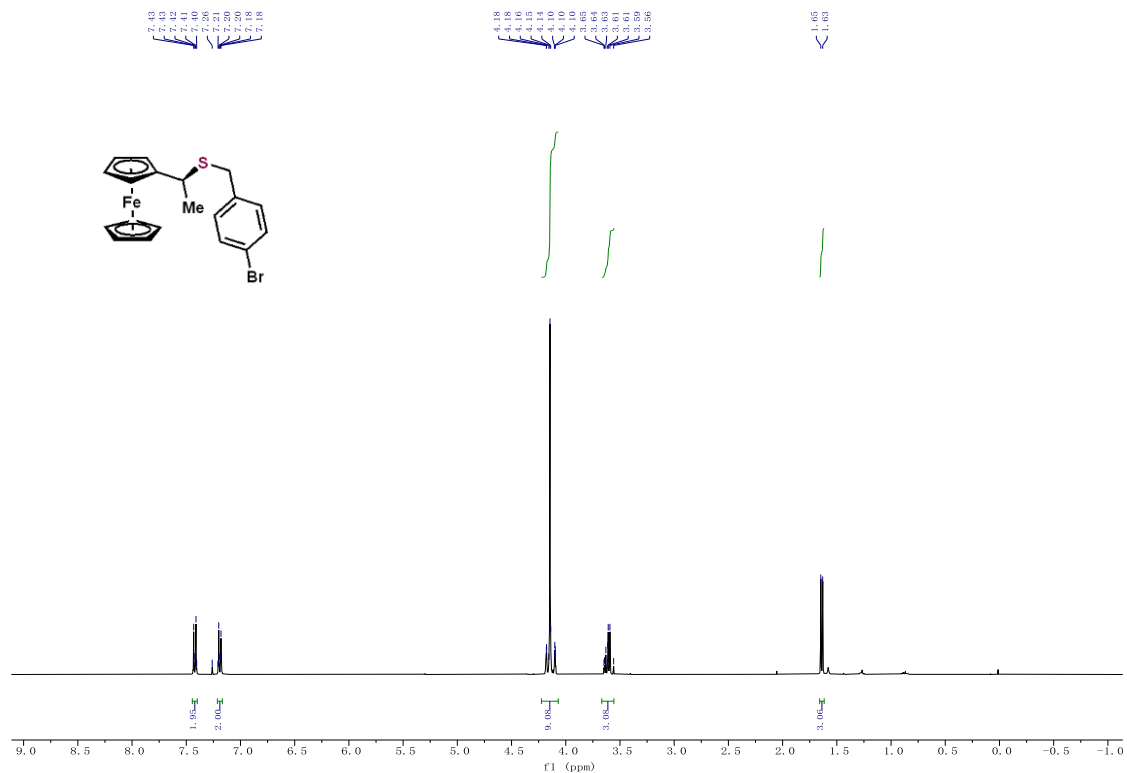

<sup>13</sup>C NMR (101 MHz, CDCl<sub>3</sub>)

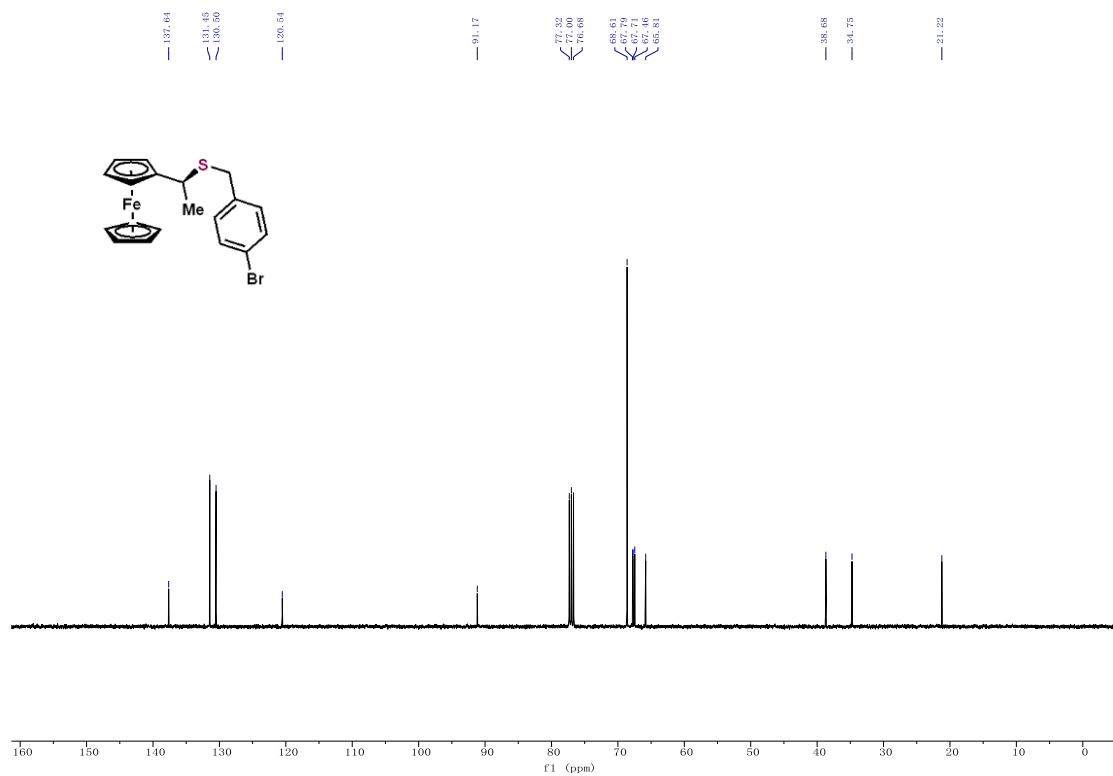

# (S)-1-((4-methoxybenzyl)thio)ethylferrocene (10)

<sup>1</sup>H NMR (400 MHz, CDCl<sub>3</sub>)

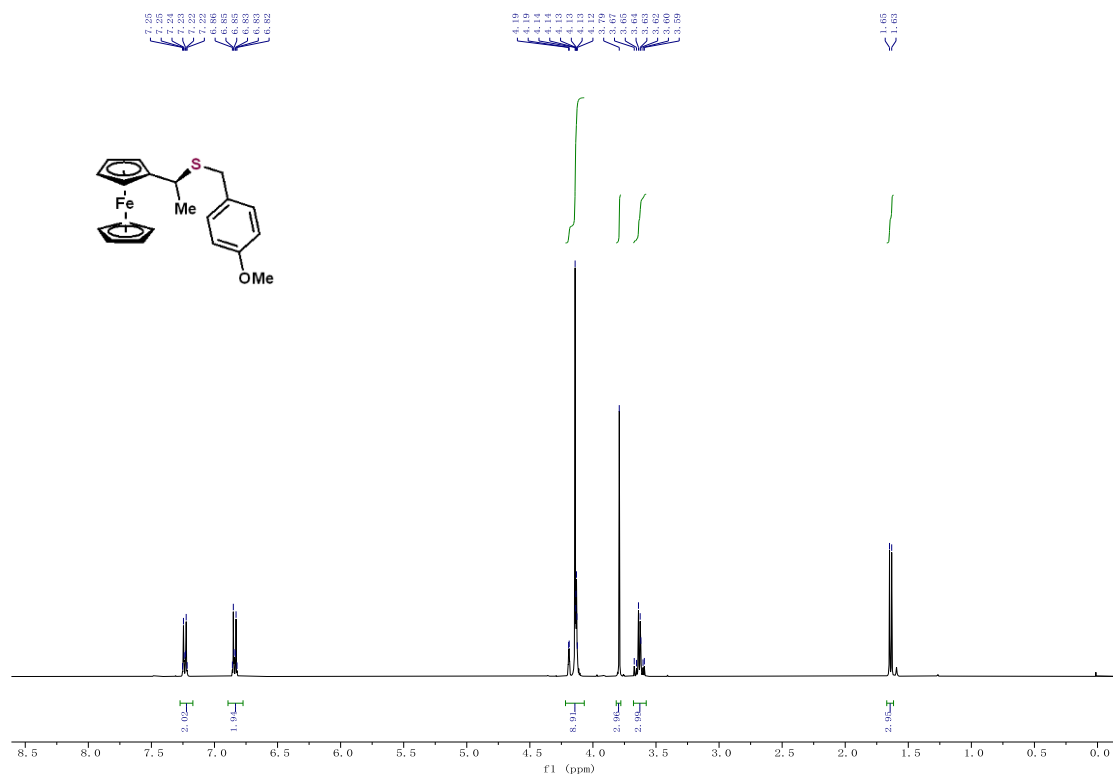

<sup>13</sup>C NMR (101 MHz, CDCl<sub>3</sub>)

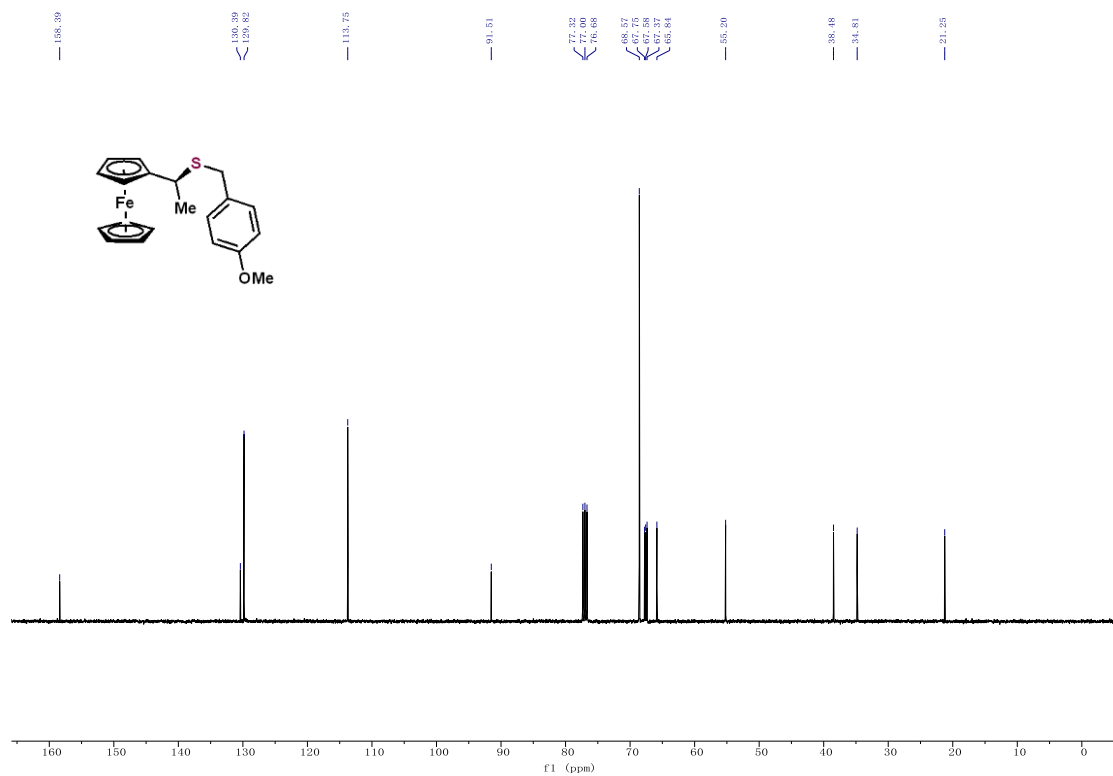

# (S)-1-(cyclohexylthio)ethylferrocene (11)

$^1\text{H}$  NMR (400 MHz,  $\text{CDCl}_3$ )

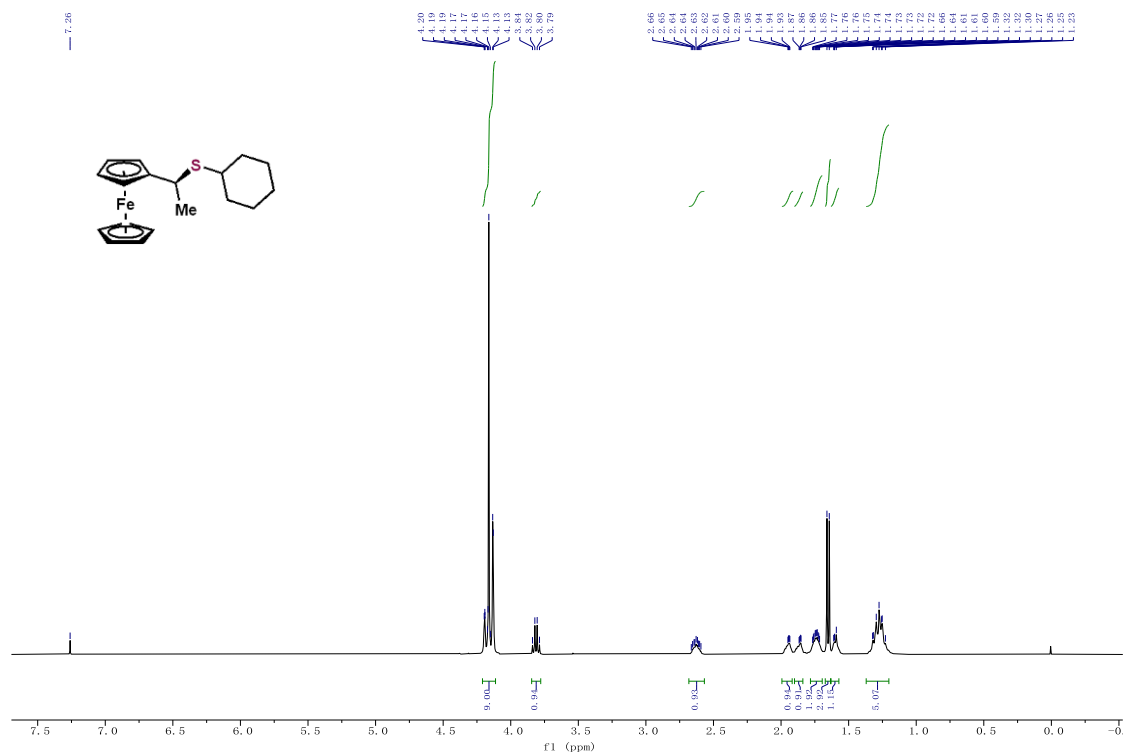

$^{13}\text{C}$  NMR (101 MHz,  $\text{CDCl}_3$ )

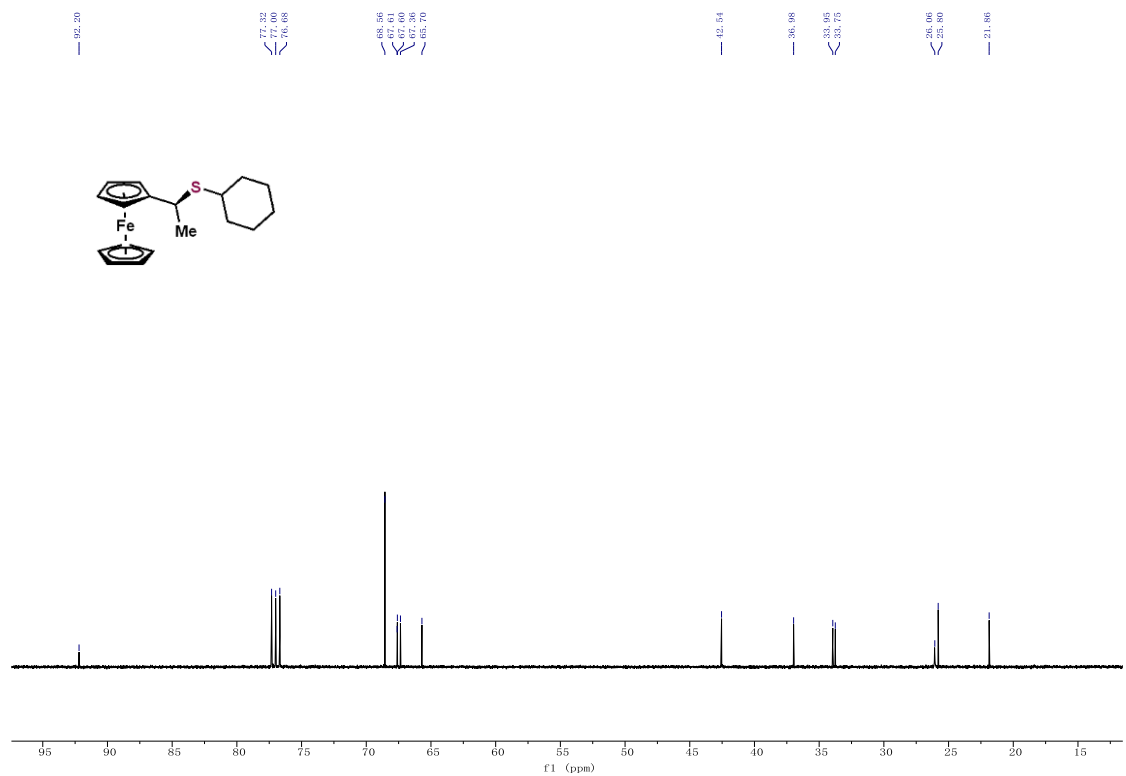

# (S)-1-(((3s,5s,7s)-adamantan-1-yl)thio)ethylferrocene (12)

<sup>1</sup>H NMR (400 MHz, CDCl<sub>3</sub>)

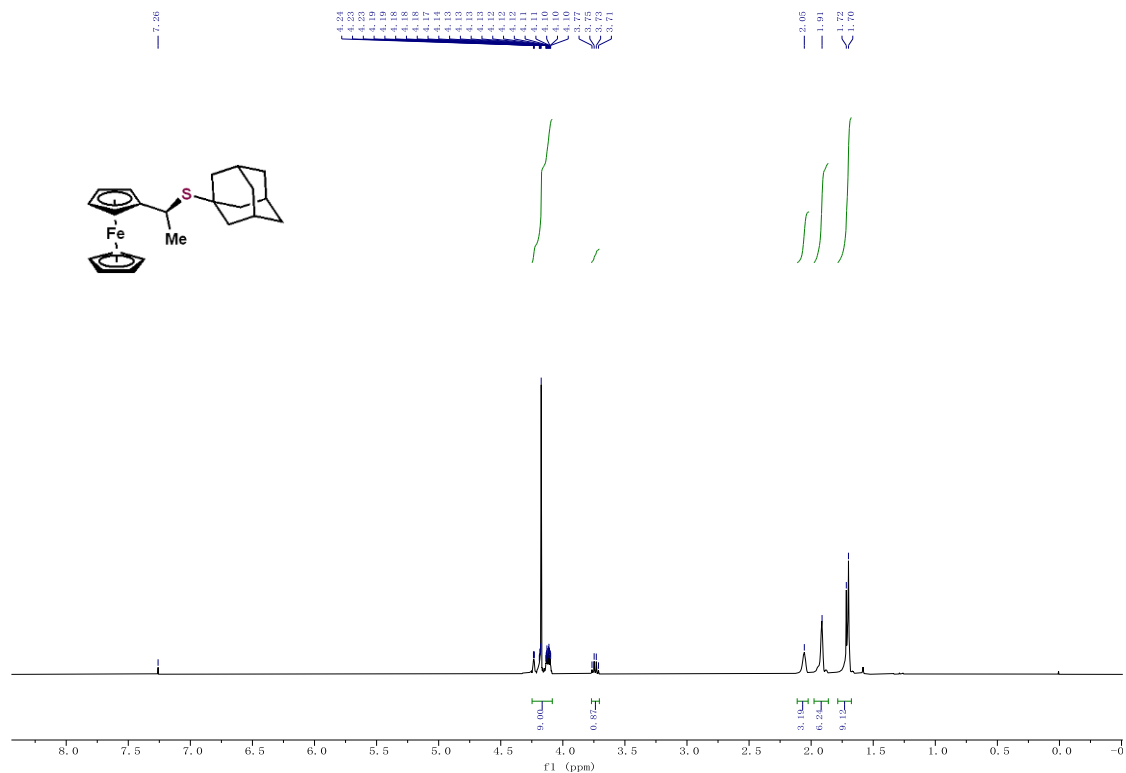

<sup>13</sup>C NMR (101 MHz, CDCl<sub>3</sub>)

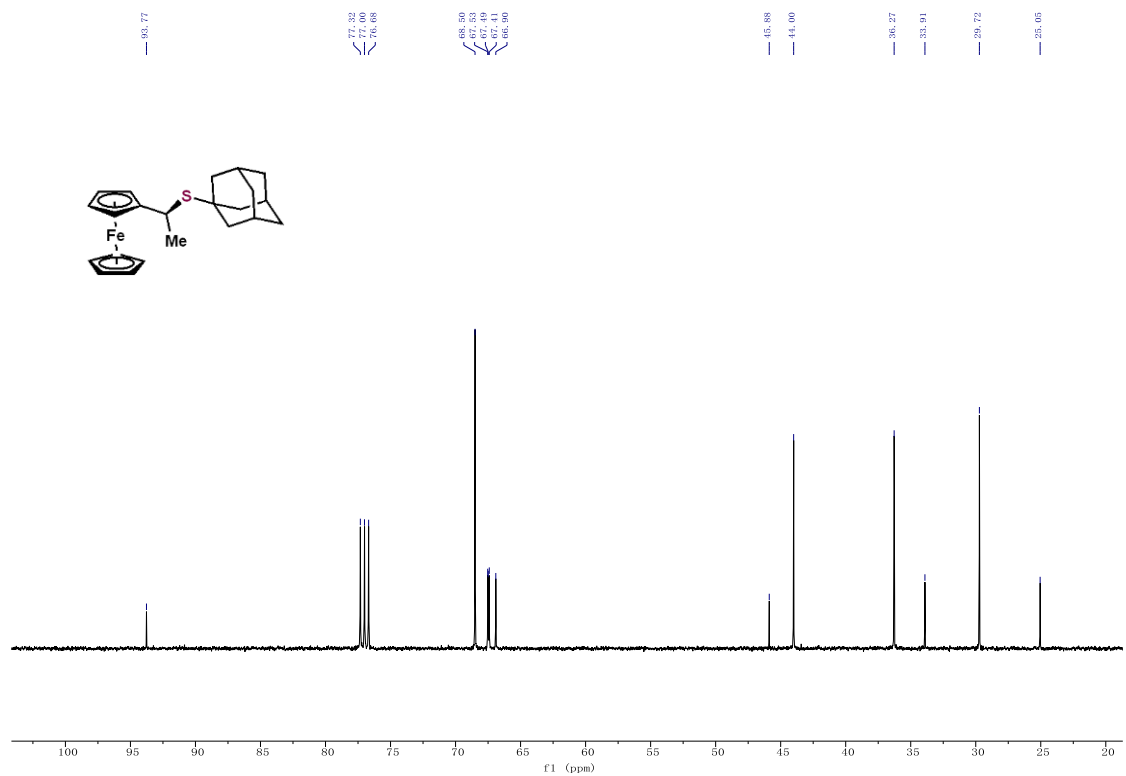

**(S)-ethyl 3-((1-ferrocene-2-yl)ethyl)thio)propanoate (13)**

<sup>1</sup>H NMR (400 MHz, CDCl<sub>3</sub>)

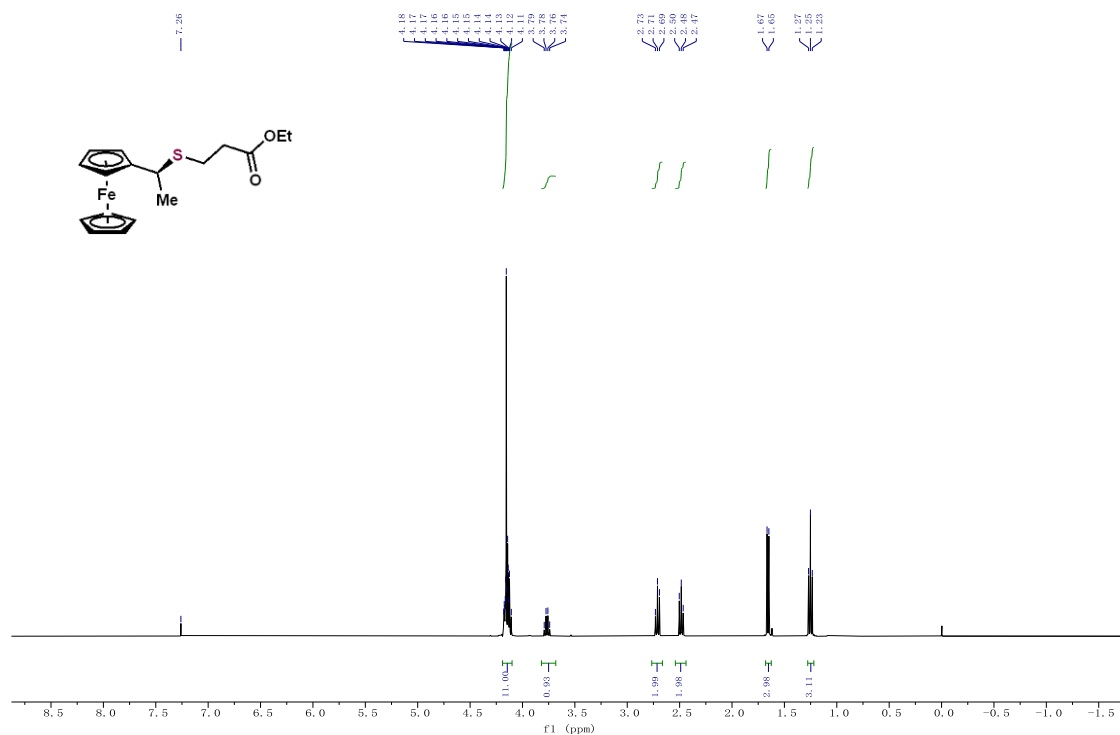

<sup>13</sup>C NMR (101 MHz, CDCl<sub>3</sub>)

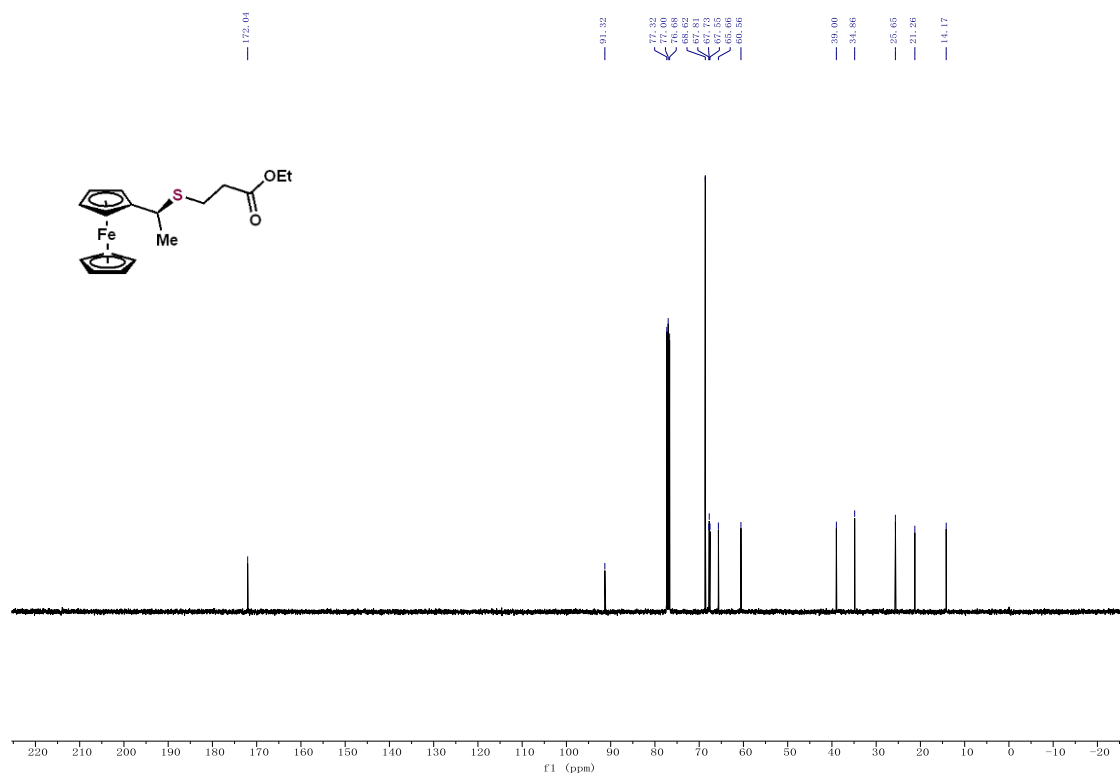

# (S)-2-((1-(ferrocene-2-yl)ethyl)thio)methylfuran (14)

<sup>1</sup>H NMR (400 MHz, CDCl<sub>3</sub>)

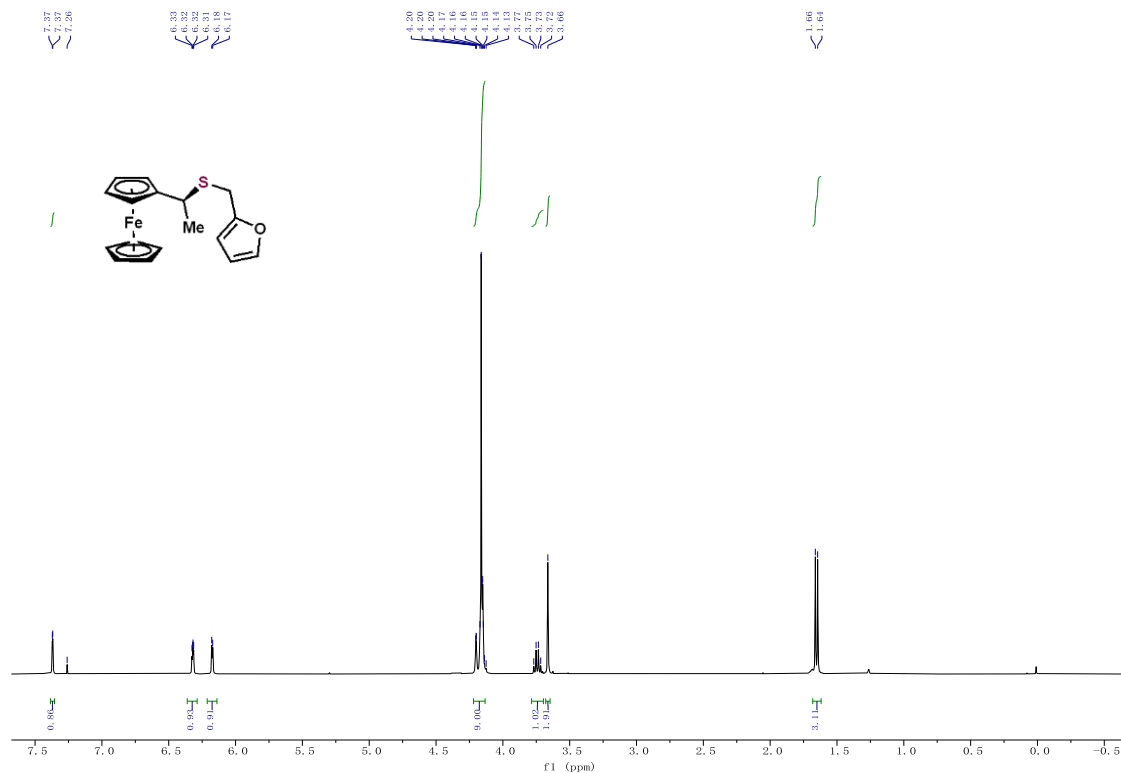

<sup>13</sup>C NMR (101 MHz, CDCl<sub>3</sub>)

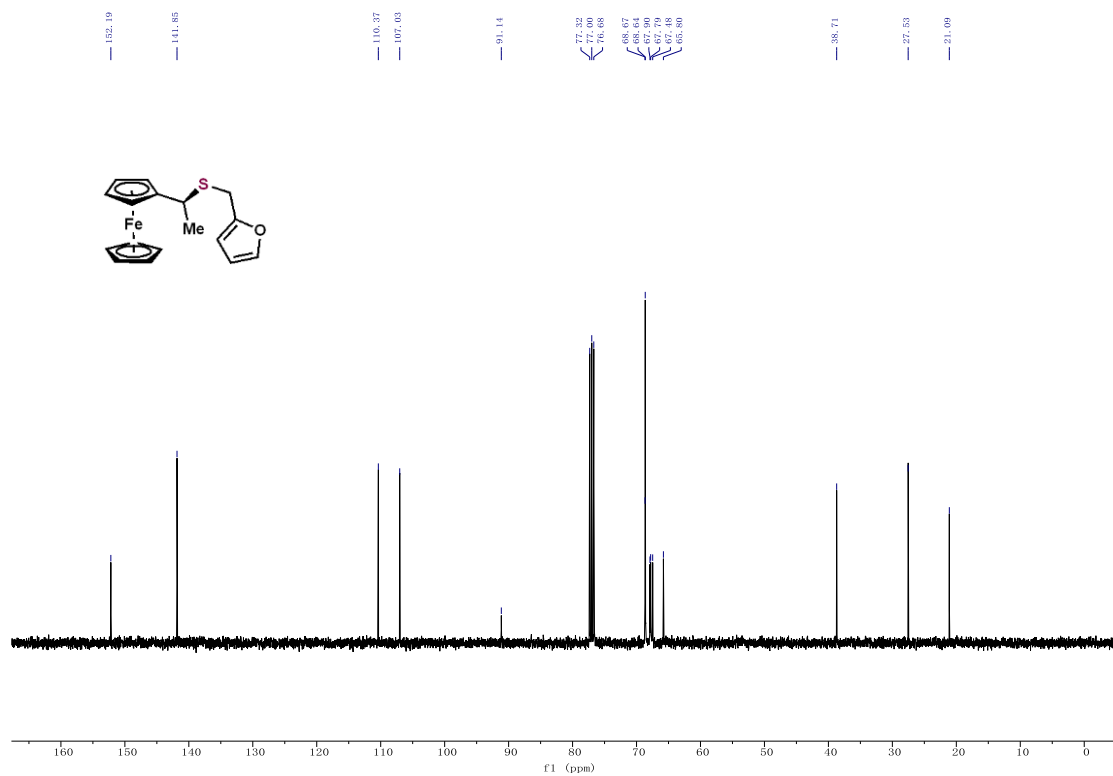

# (S)-2-(2-((1-ferrocene-2-yl)ethyl)thio)ethylpyrazine (15)

$^1\text{H}$  NMR (400 MHz,  $\text{CDCl}_3$ )

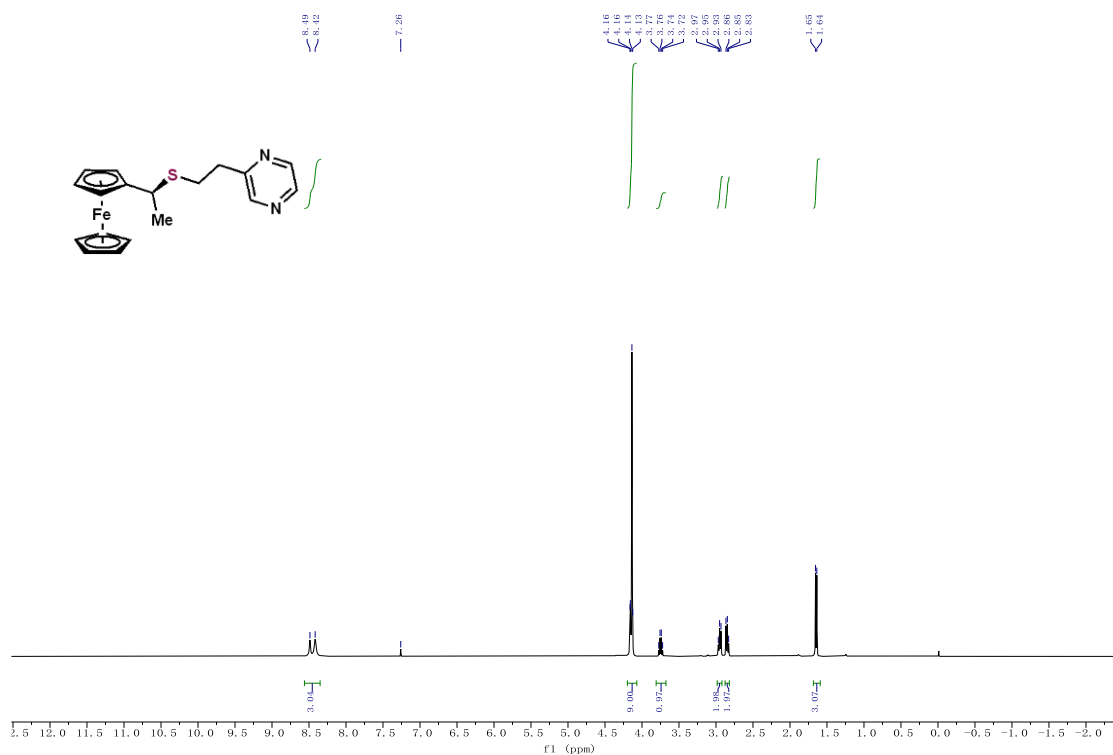

$^{13}\text{C}$  NMR (101 MHz,  $\text{CDCl}_3$ )

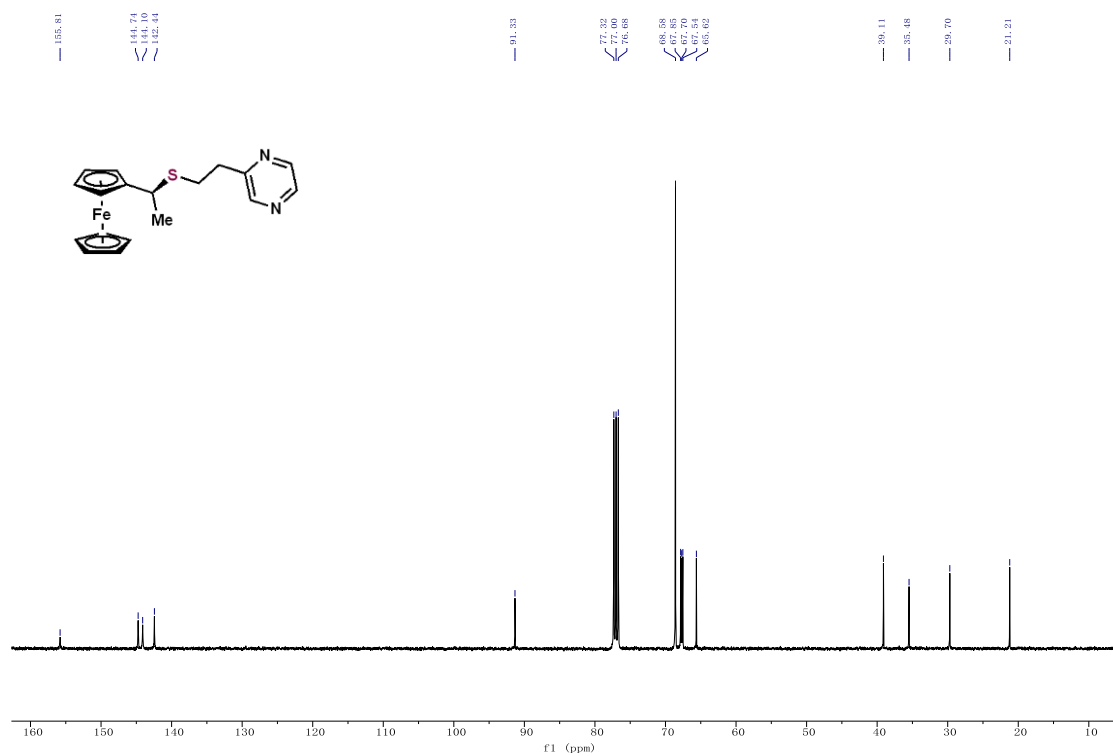

# (S)-1-(2-hydroxyethylthio)ethylferrocene (16)

$^1\text{H}$  NMR (400 MHz,  $\text{CDCl}_3$ )

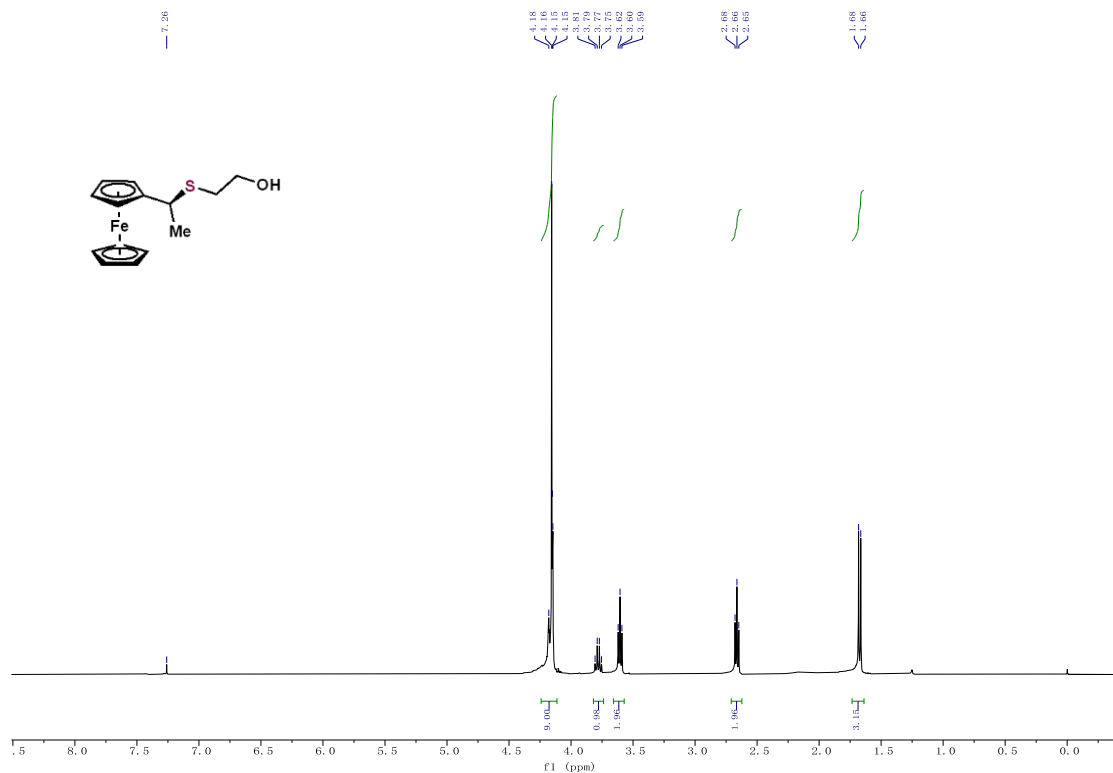

$^{13}\text{C}$  NMR (101 MHz,  $\text{CDCl}_3$ )

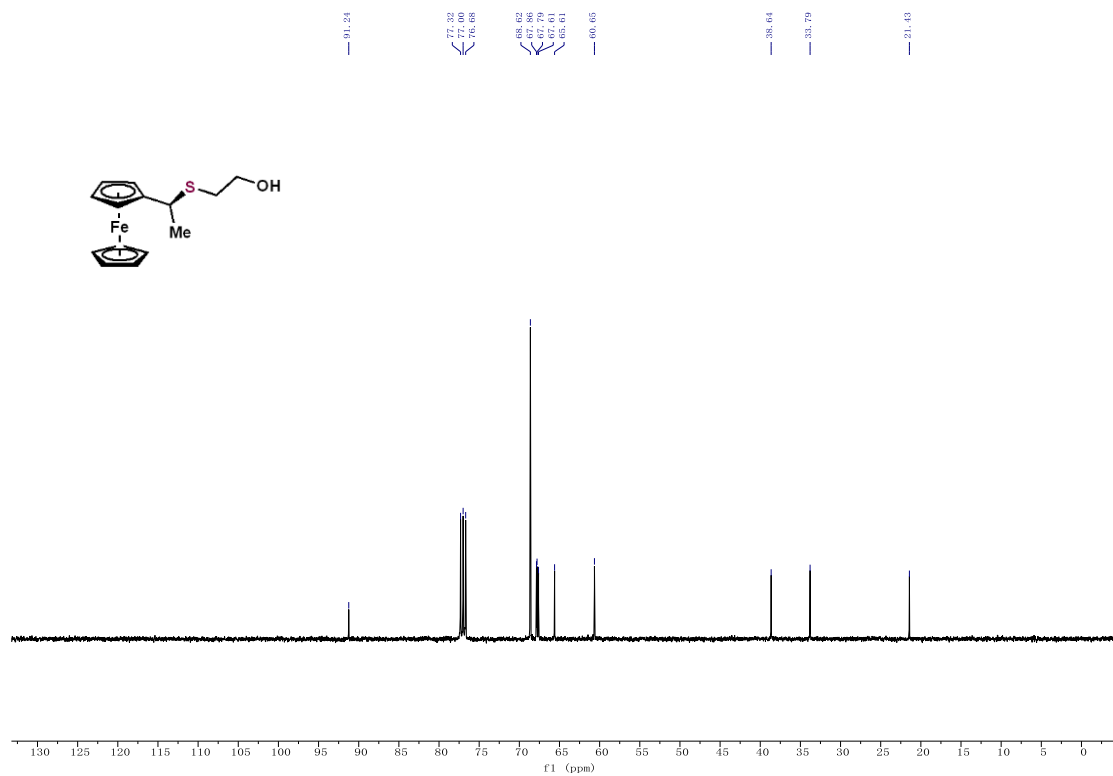

# (S)-2-((1-ferrocene)ethylthio)aniline (17)

<sup>1</sup>H NMR (400 MHz, CDCl<sub>3</sub>)

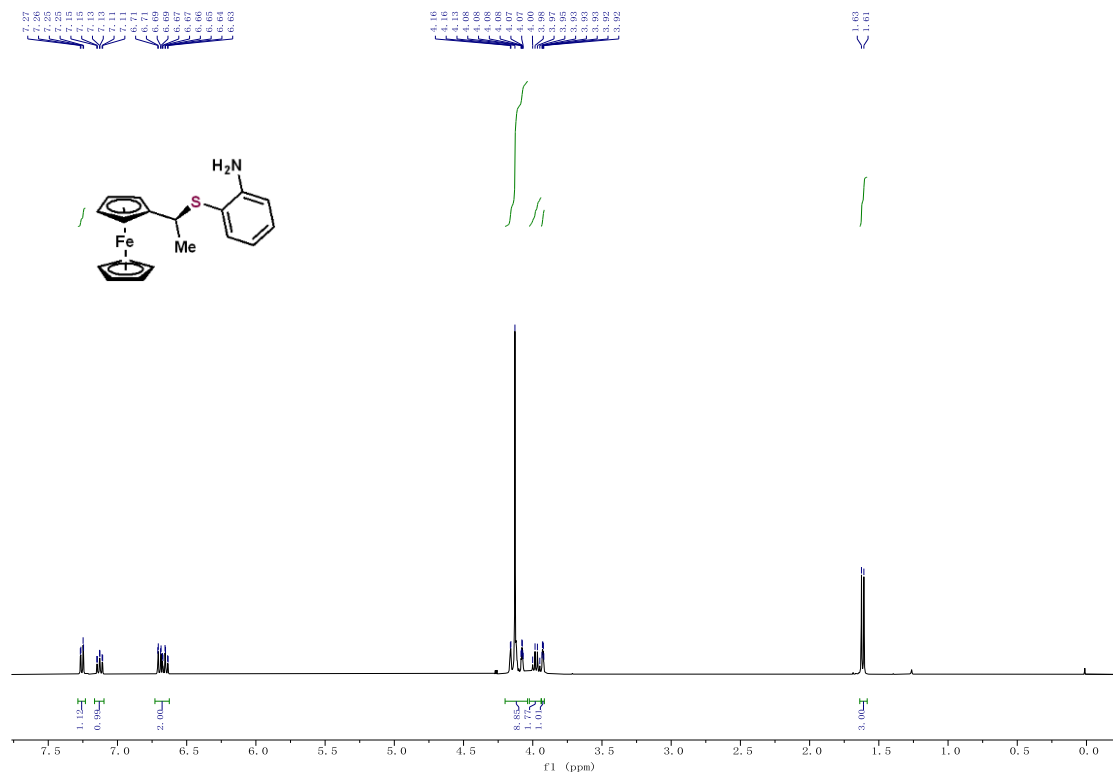

<sup>13</sup>C NMR (101 MHz, CDCl<sub>3</sub>)

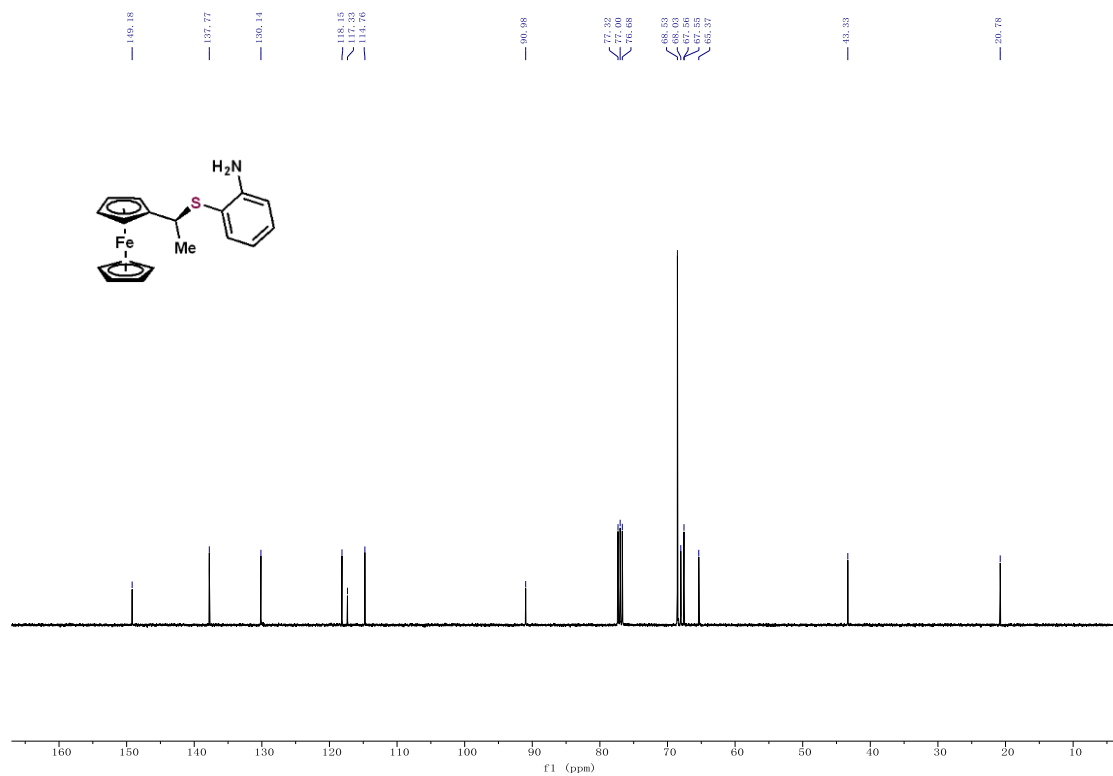

# (S)-1-((4-bromophenyl)thio)ethylferrocene (18)

$^1\text{H}$  NMR (400 MHz,  $\text{CDCl}_3$ )

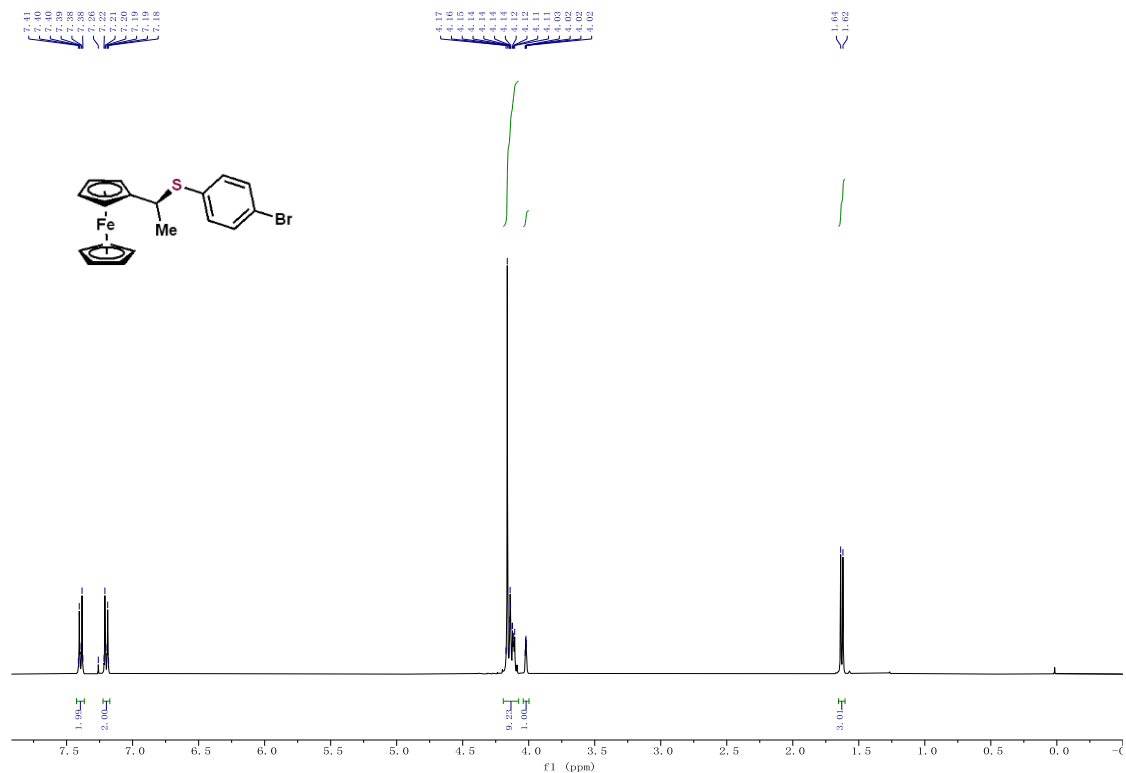

$^{13}\text{C}$  NMR (101 MHz,  $\text{CDCl}_3$ )

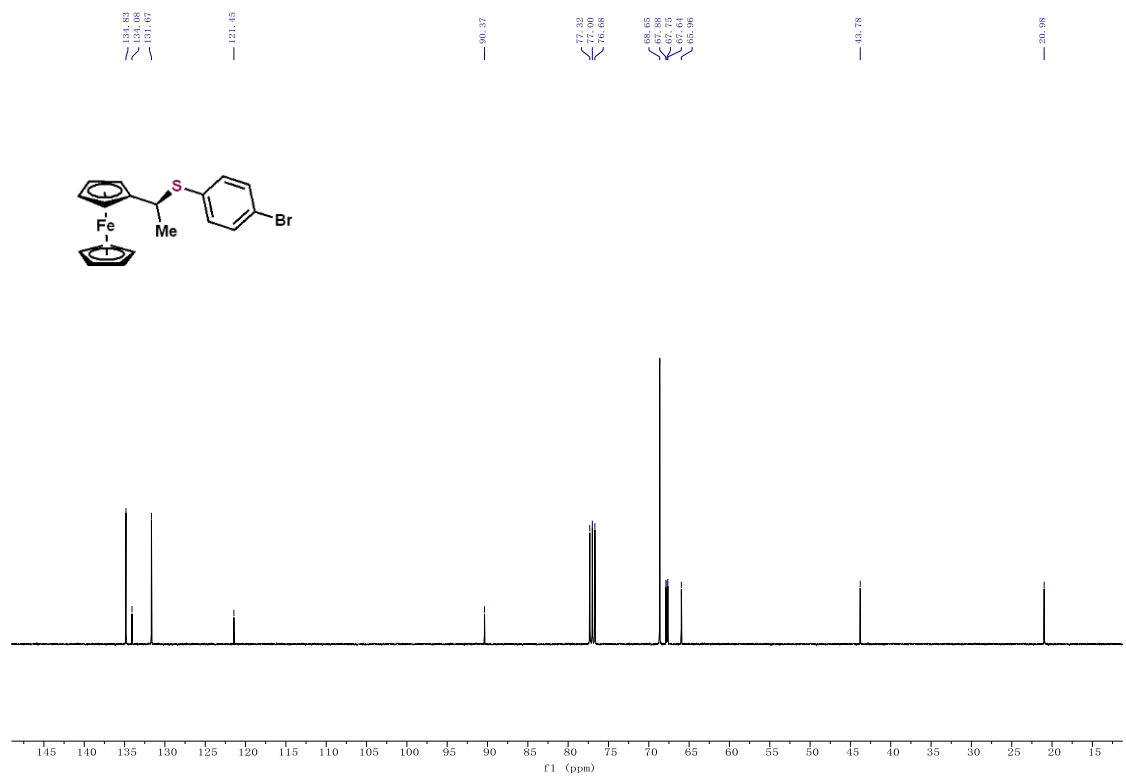

# (S)-2-(1-(thiophen-2-ylthio)ethyl)ferrocene (19)

<sup>1</sup>H NMR (400 MHz, CDCl<sub>3</sub>)

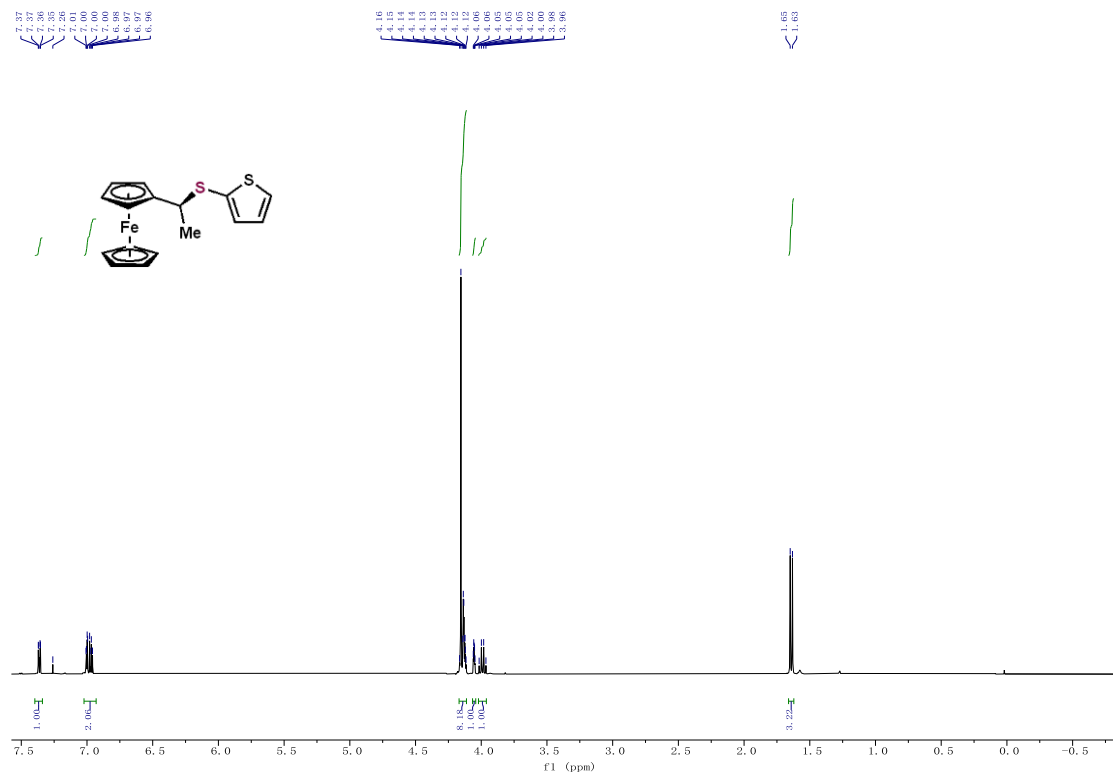

<sup>13</sup>C NMR (101 MHz, CDCl<sub>3</sub>)

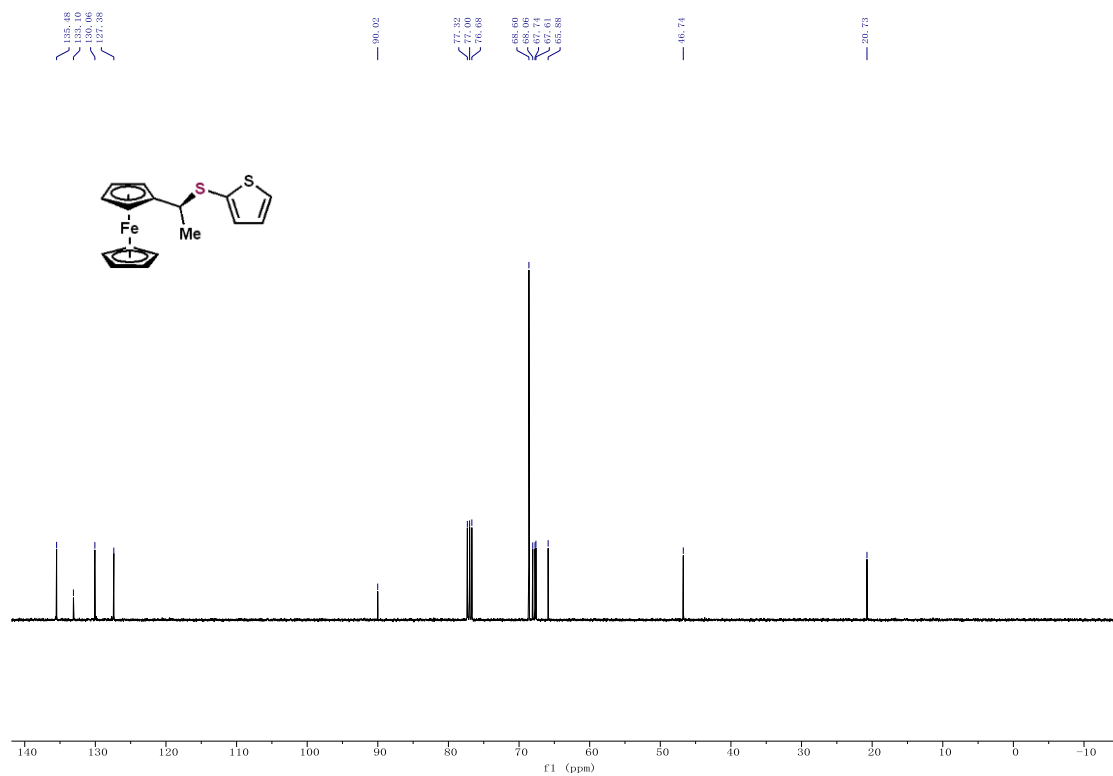

# (S)-2-((1-(ferrocene-2-yl)ethyl)thio)pyrimidine (20)

<sup>1</sup>H NMR (400 MHz, CDCl<sub>3</sub>)

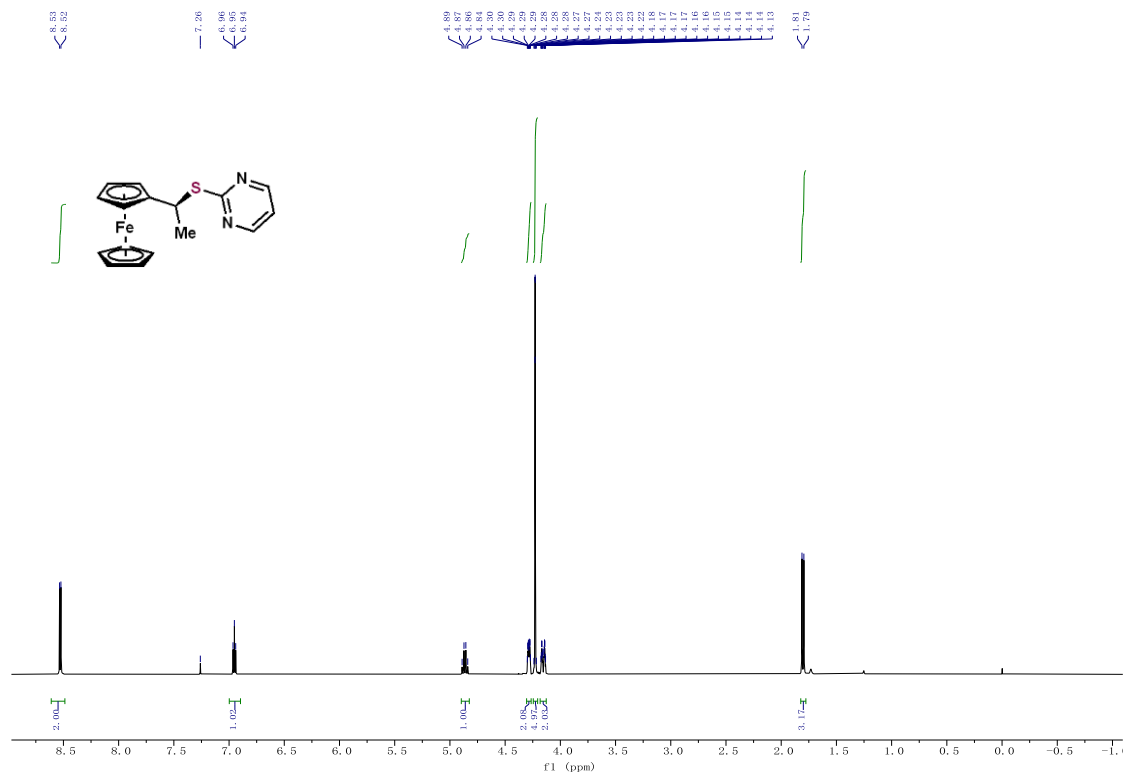

<sup>13</sup>C NMR (101 MHz, CDCl<sub>3</sub>)

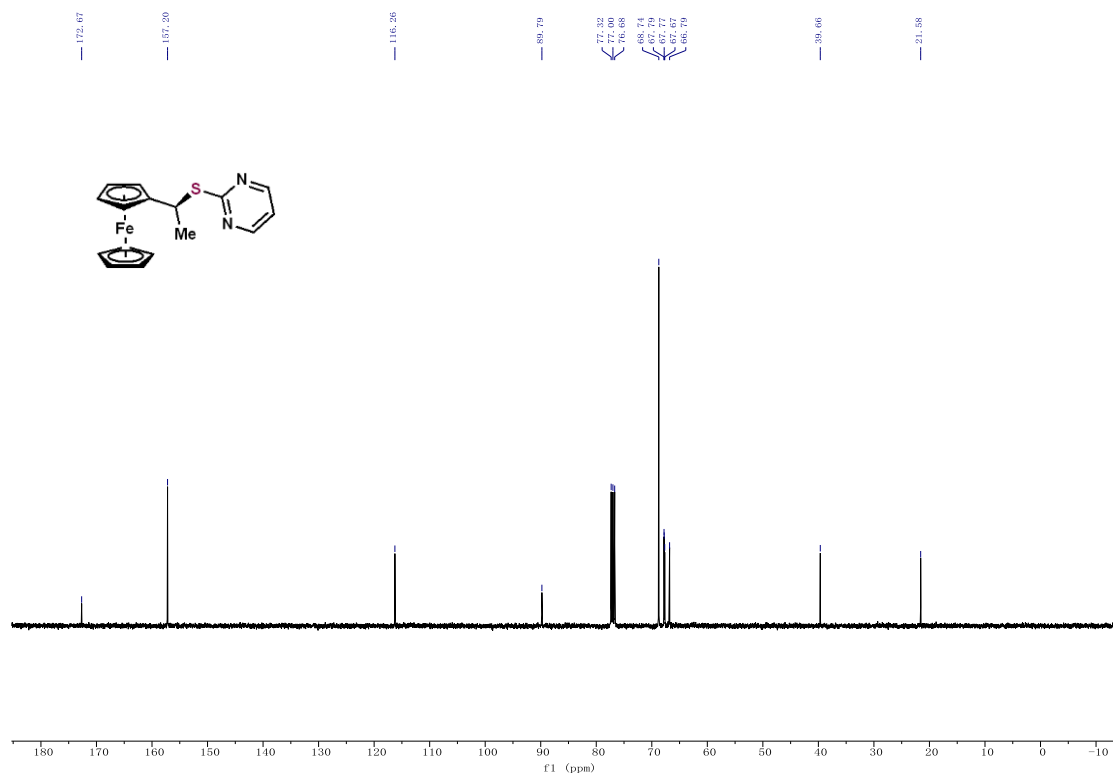

# methyl N-acetyl-S-((S)-1-(ferrocene-2-yl)ethyl)-L-cysteinate (21)

<sup>1</sup>H NMR (400 MHz, CDCl<sub>3</sub>)

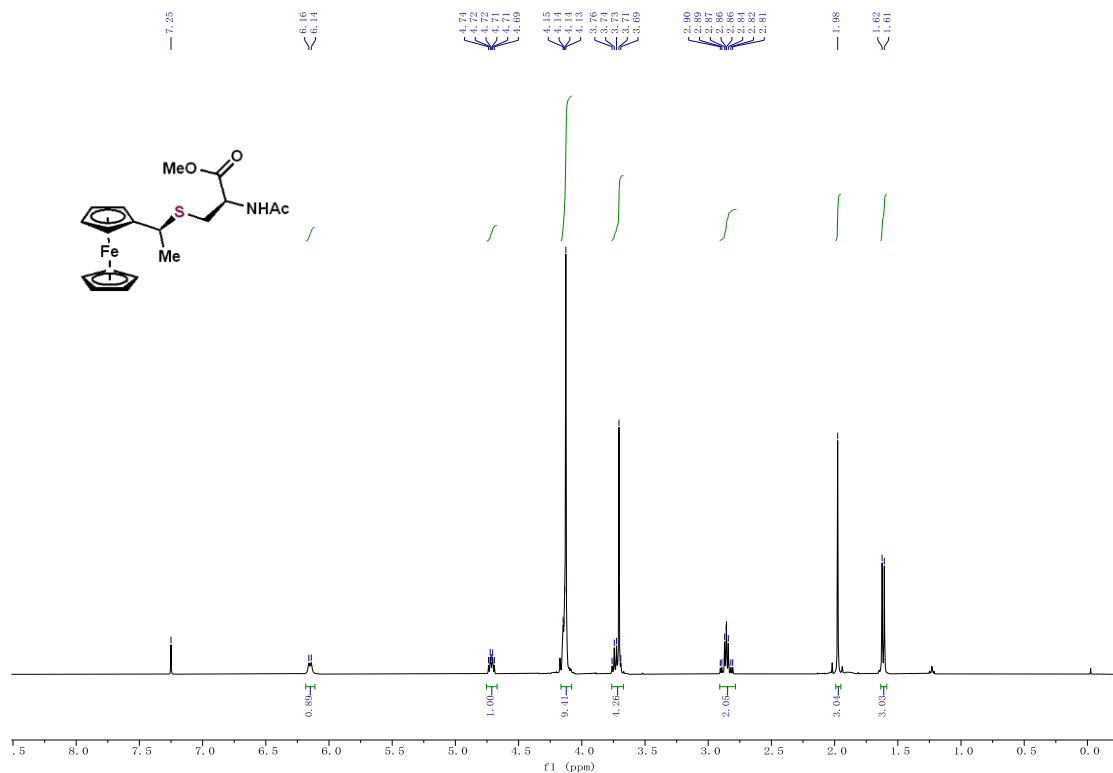

<sup>13</sup>C NMR (101 MHz, CDCl<sub>3</sub>)

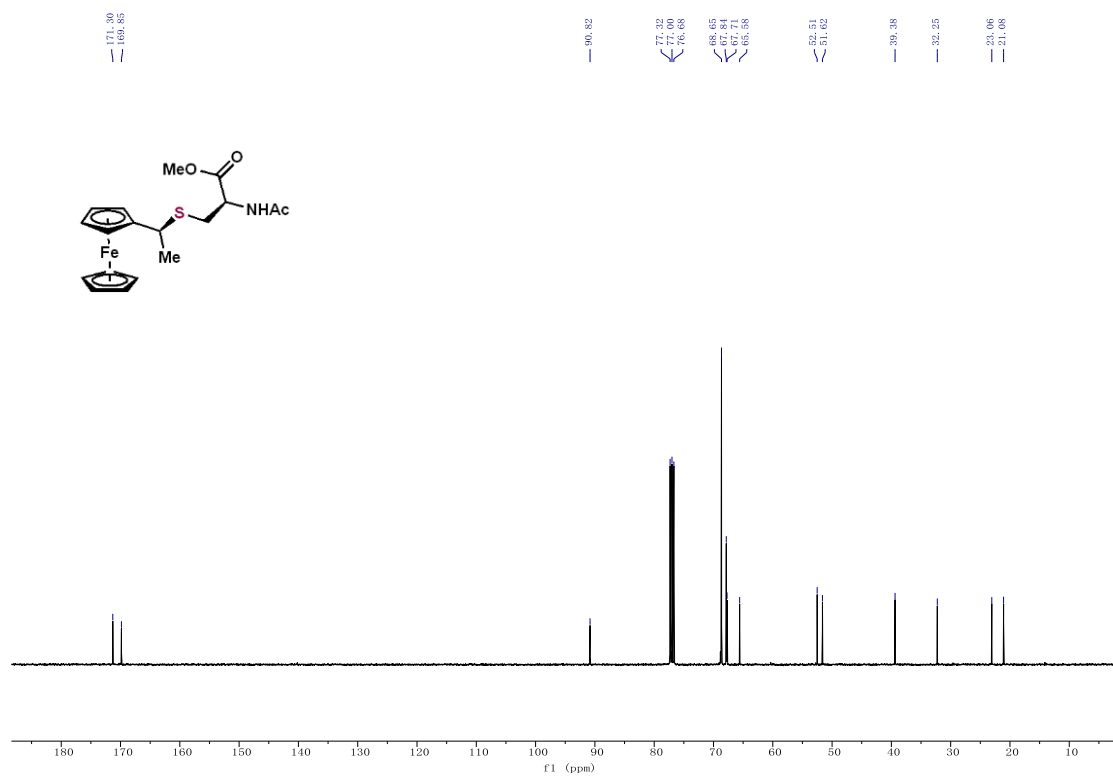

# (S)-2-((1-(ferrocene-2-yl)ethylthio)ethyl 4-(pyren-1-yl)butanoate (22)

$^1\text{H}$  NMR (400 MHz,  $\text{CDCl}_3$ )

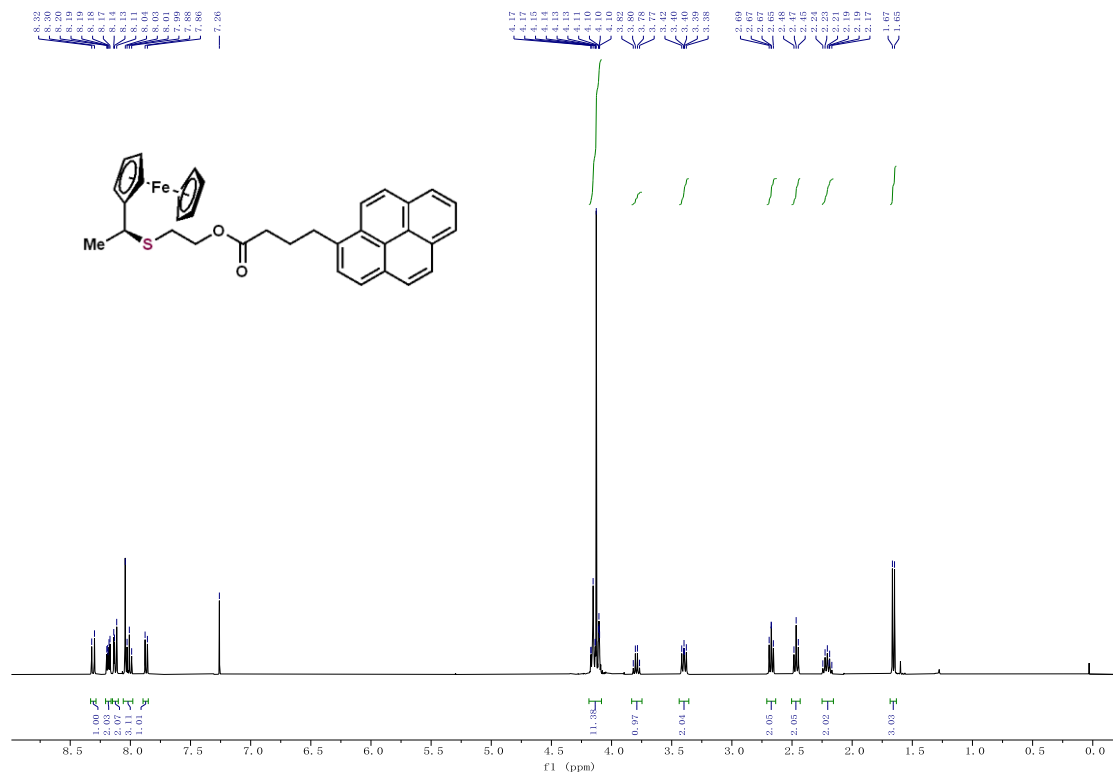

$^{13}\text{C}$  NMR (101 MHz,  $\text{CDCl}_3$ )

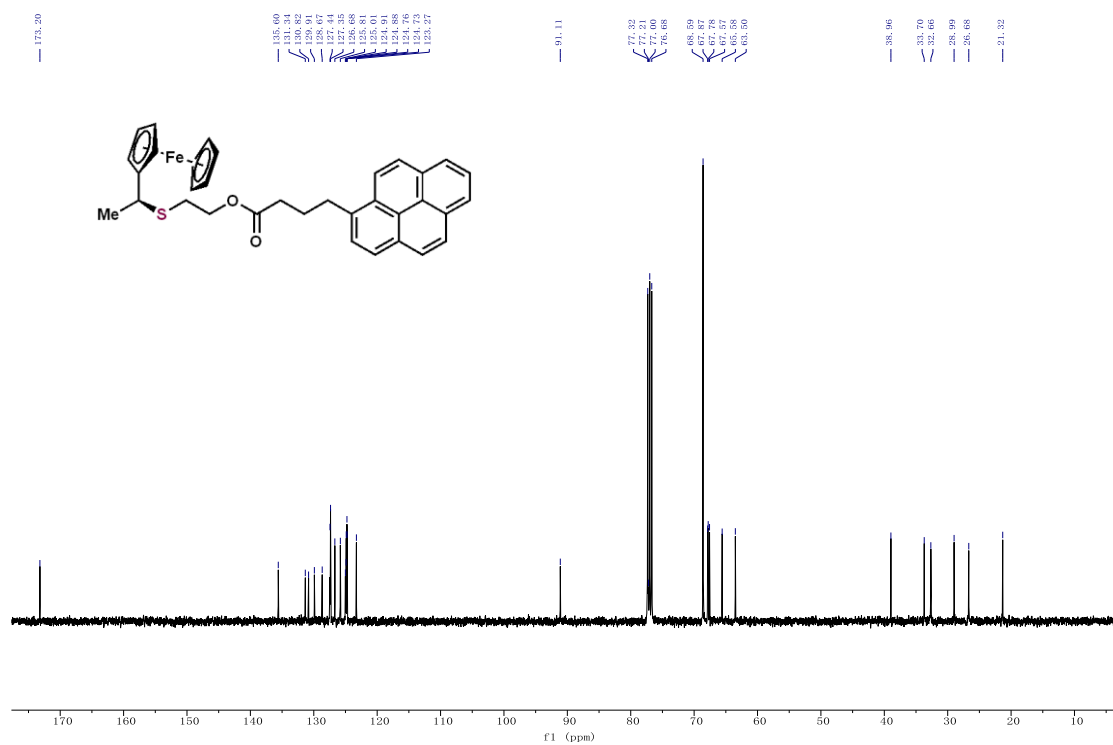

**(2S,3S,4R,5S)-2-(acetoxymethyl)-6-(((S)-1-((ferrocene-2-yl)ethyl)thio)tetrahydro-2H-pyran-3,4,5-triyl triacetate (23)**

<sup>1</sup>H NMR (400 MHz, CDCl<sub>3</sub>)

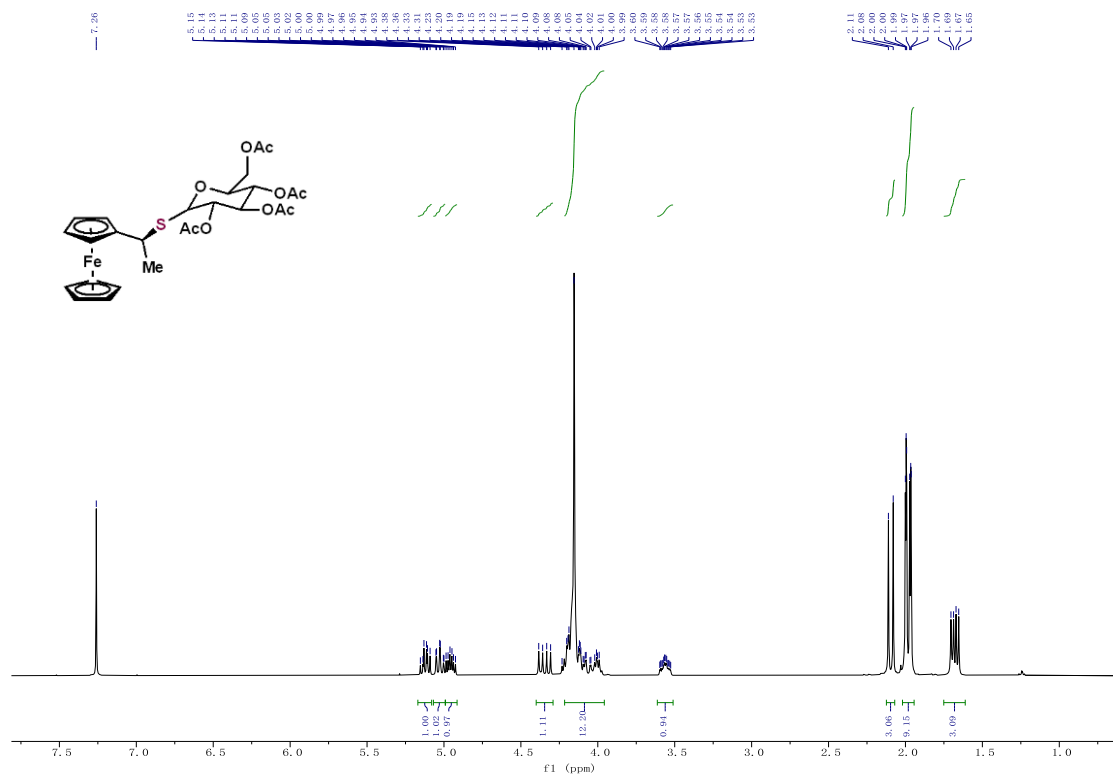

<sup>13</sup>C NMR (101 MHz, CDCl<sub>3</sub>)

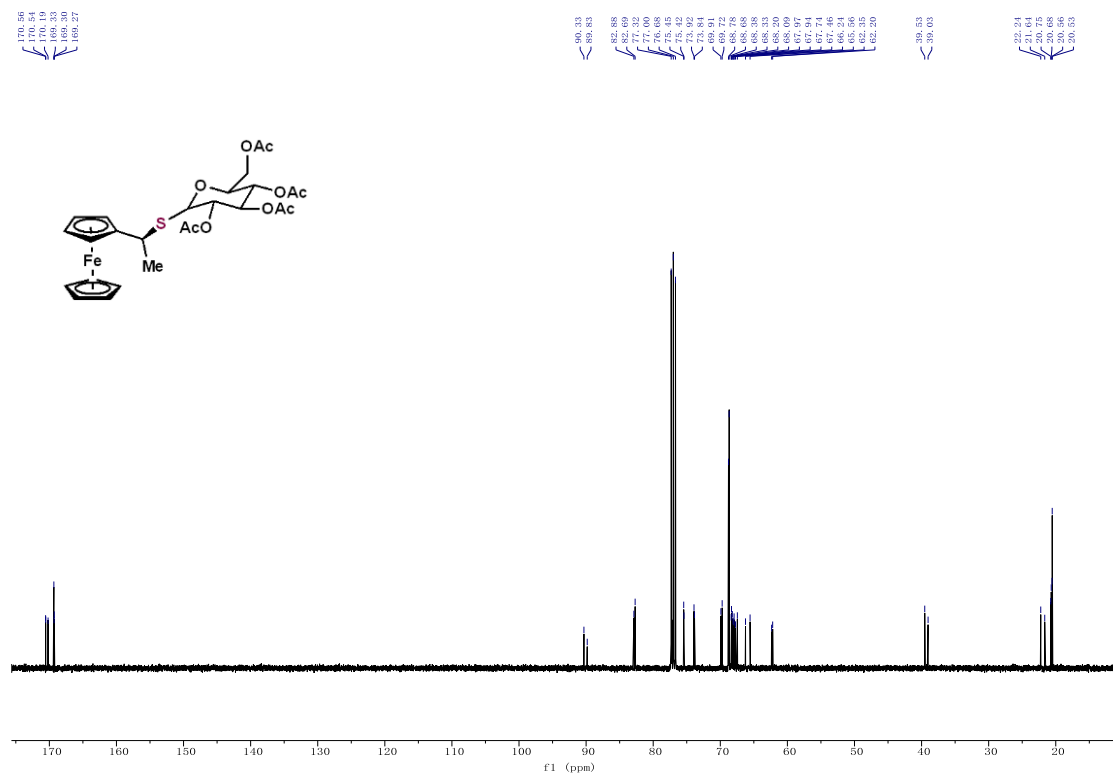

# (S)-2-((benzylthio)(phenyl)methyl) ferrocene (24)

<sup>1</sup>H NMR (400 MHz, CDCl<sub>3</sub>)

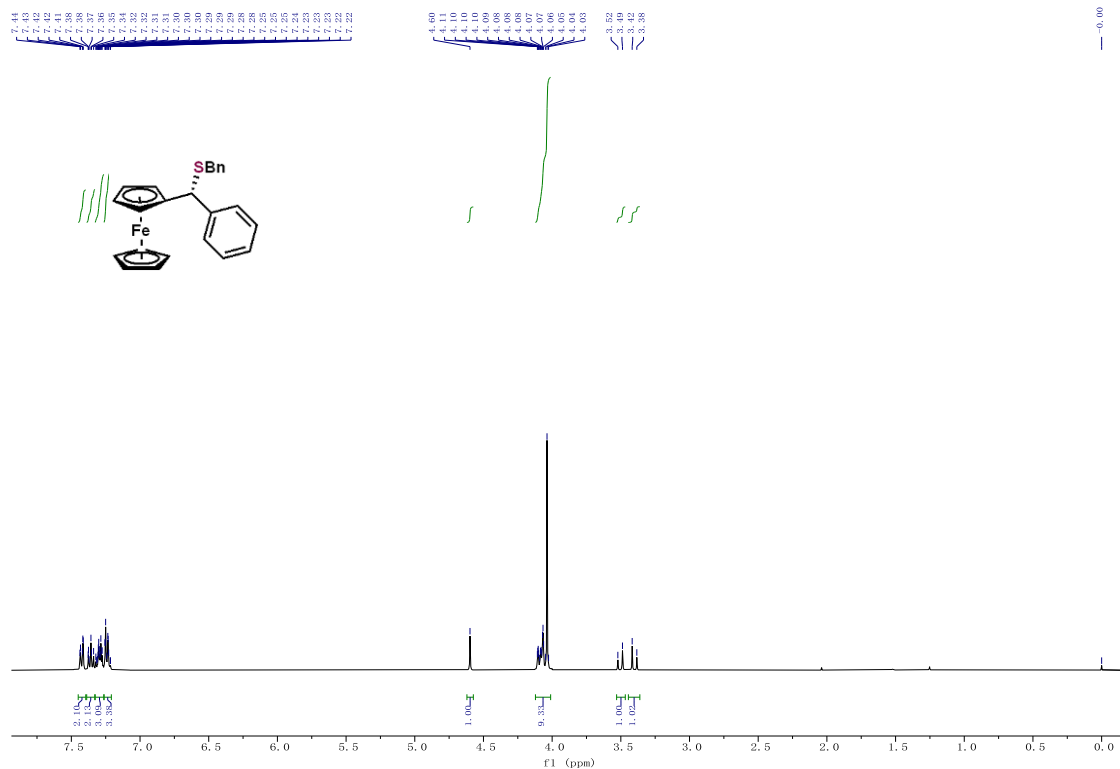

<sup>13</sup>C NMR (101 MHz, CDCl<sub>3</sub>)

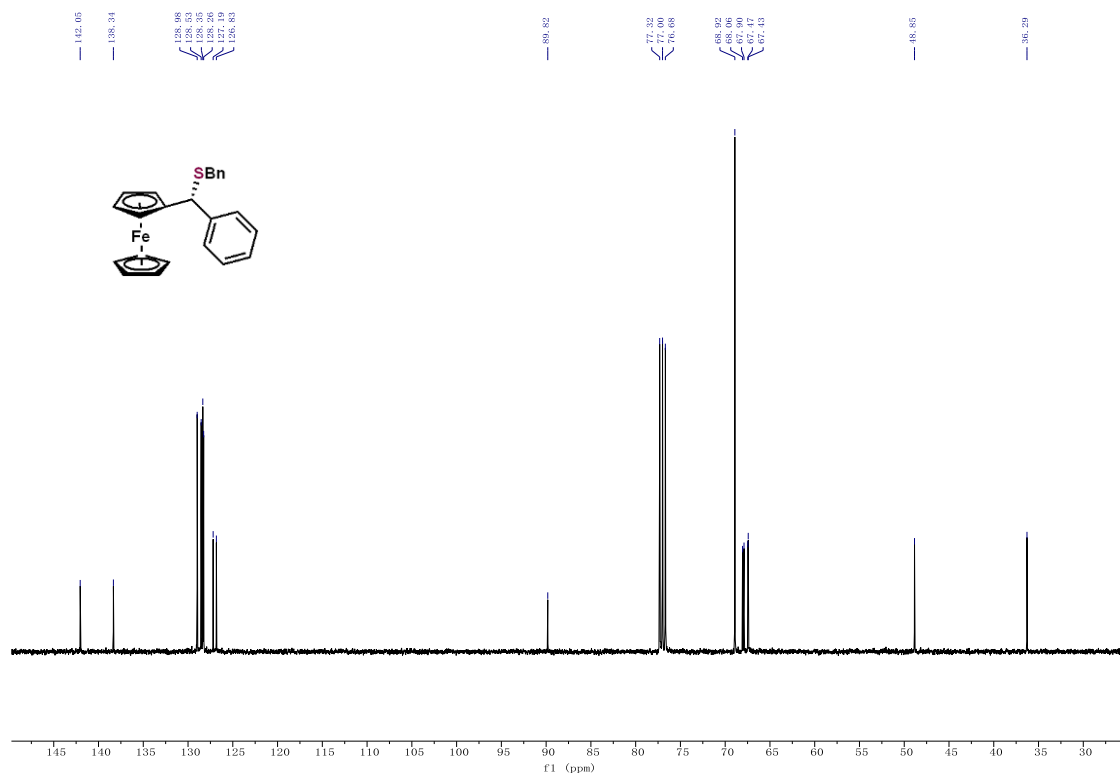

# (S)-2-((benzylthio)(4-fluorophenyl)methyl) ferrocene (25)

$^1\text{H}$  NMR (400 MHz,  $\text{CDCl}_3$ )

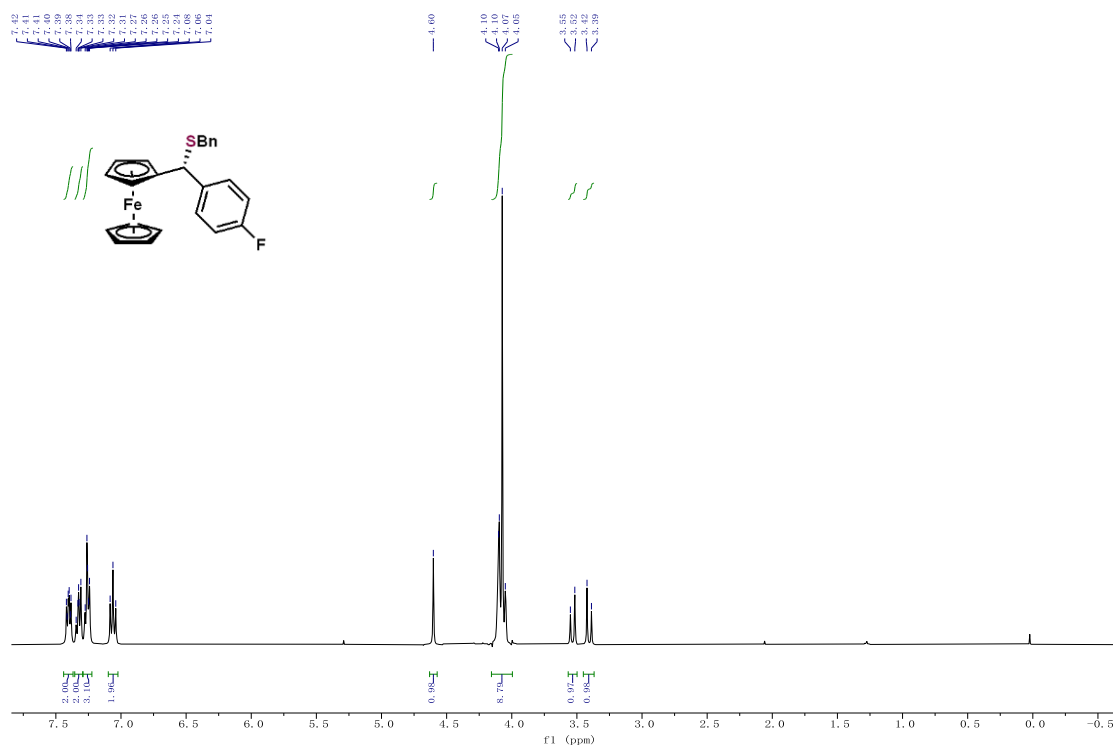

$^{13}\text{C}$  NMR (101 MHz,  $\text{CDCl}_3$ )

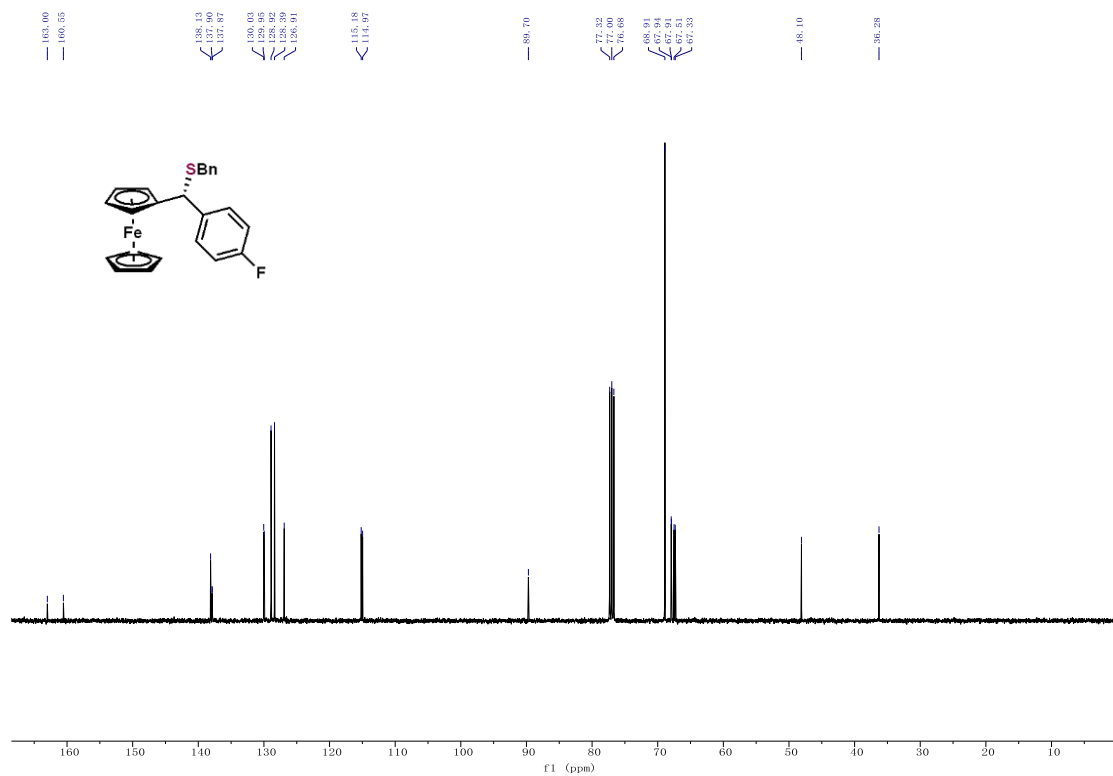

**$^{19}\text{F}$  NMR (376 MHz,  $\text{CDCl}_3$ )**

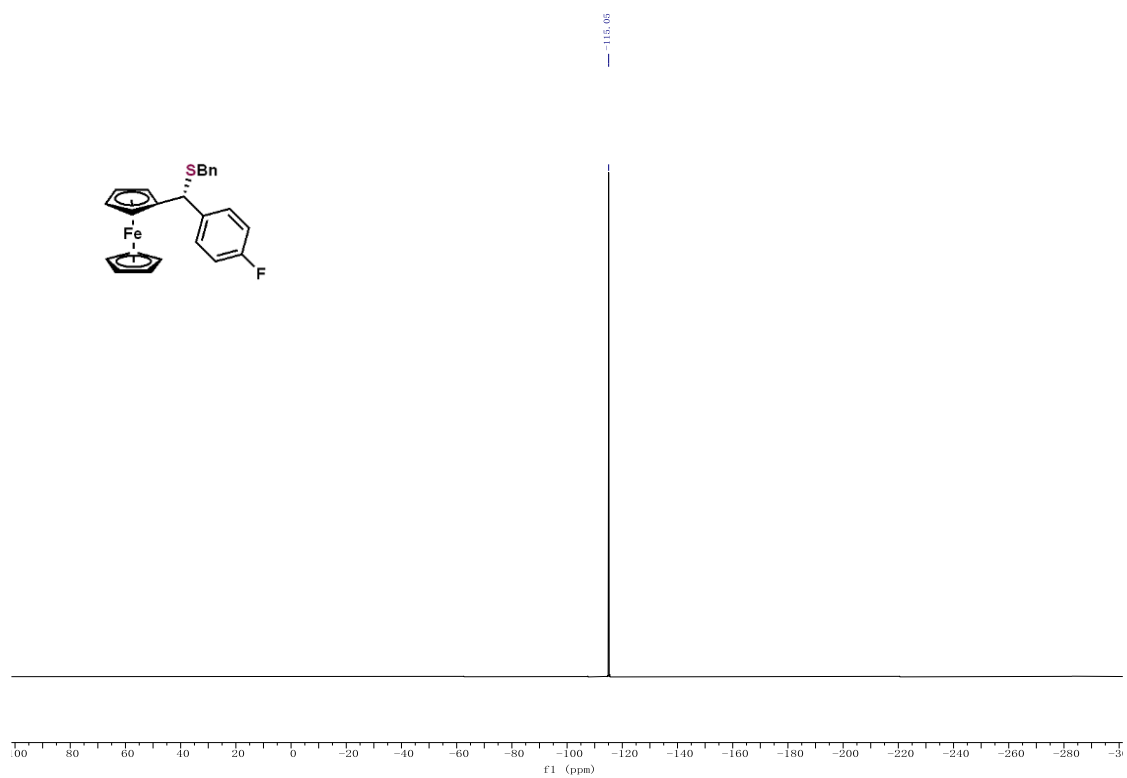

# (S)-2-((benzylthio)(4-(trifluoromethyl)phenyl)methyl) ferrocene (26)

$^1\text{H}$  NMR (400 MHz,  $\text{CDCl}_3$ )

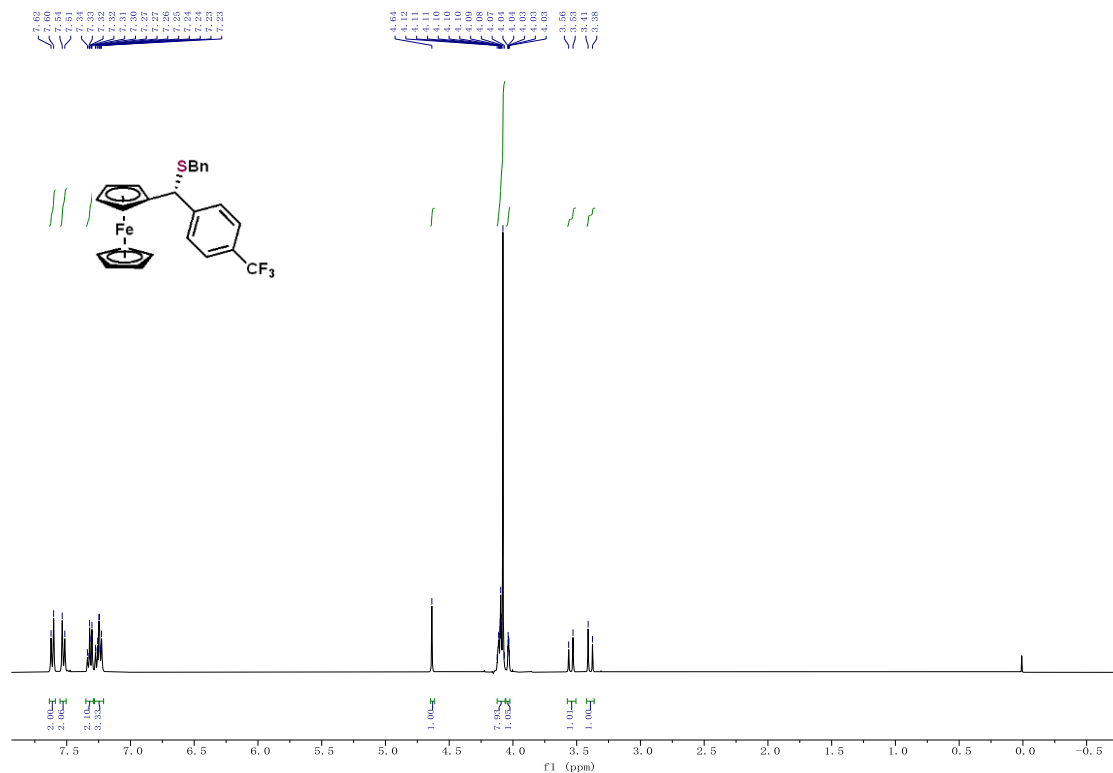

$^{13}\text{C}$  NMR (101 MHz,  $\text{CDCl}_3$ )

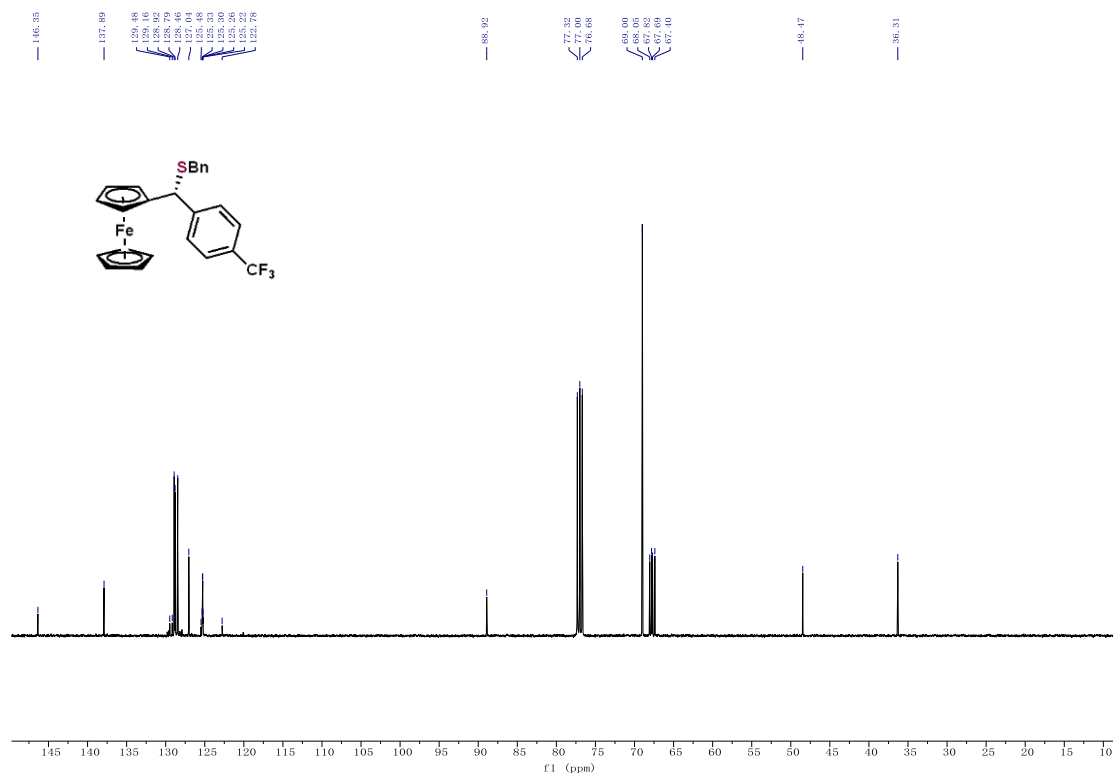

**$^{19}\text{F}$  NMR (376 MHz,  $\text{CDCl}_3$ )**

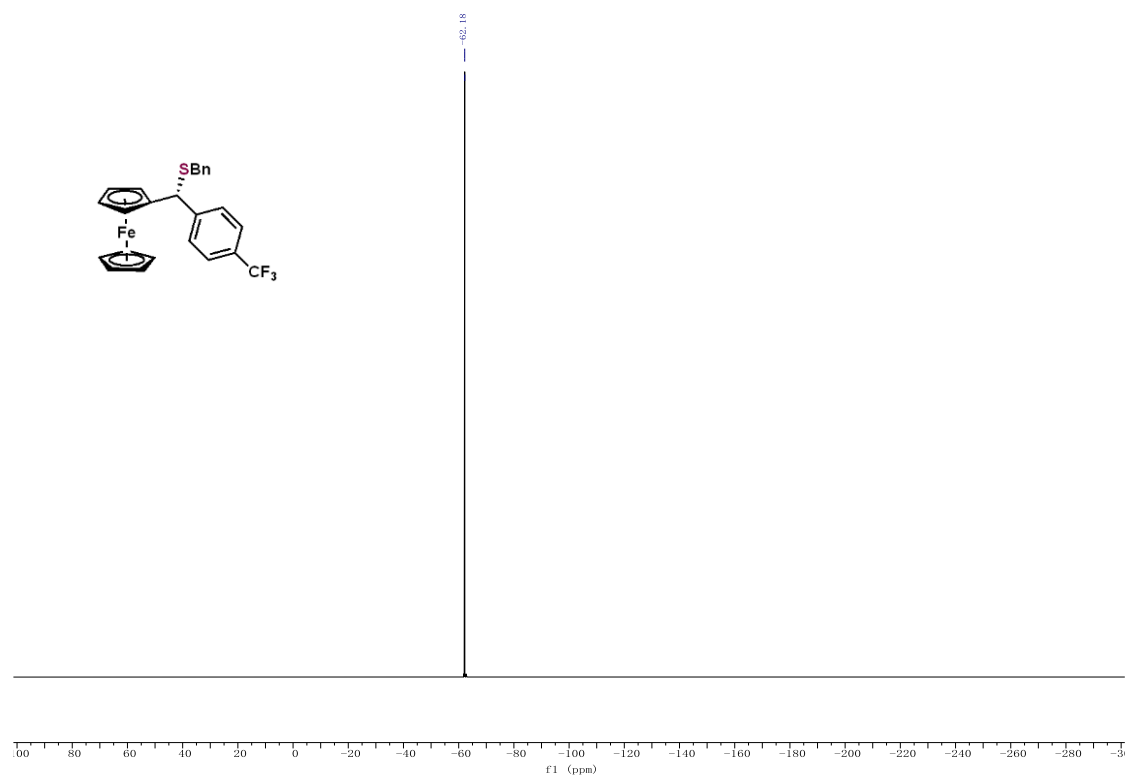

# (S)-1-(benzylthio)propylferrocene (27)

$^1\text{H}$  NMR (400 MHz,  $\text{CDCl}_3$ )

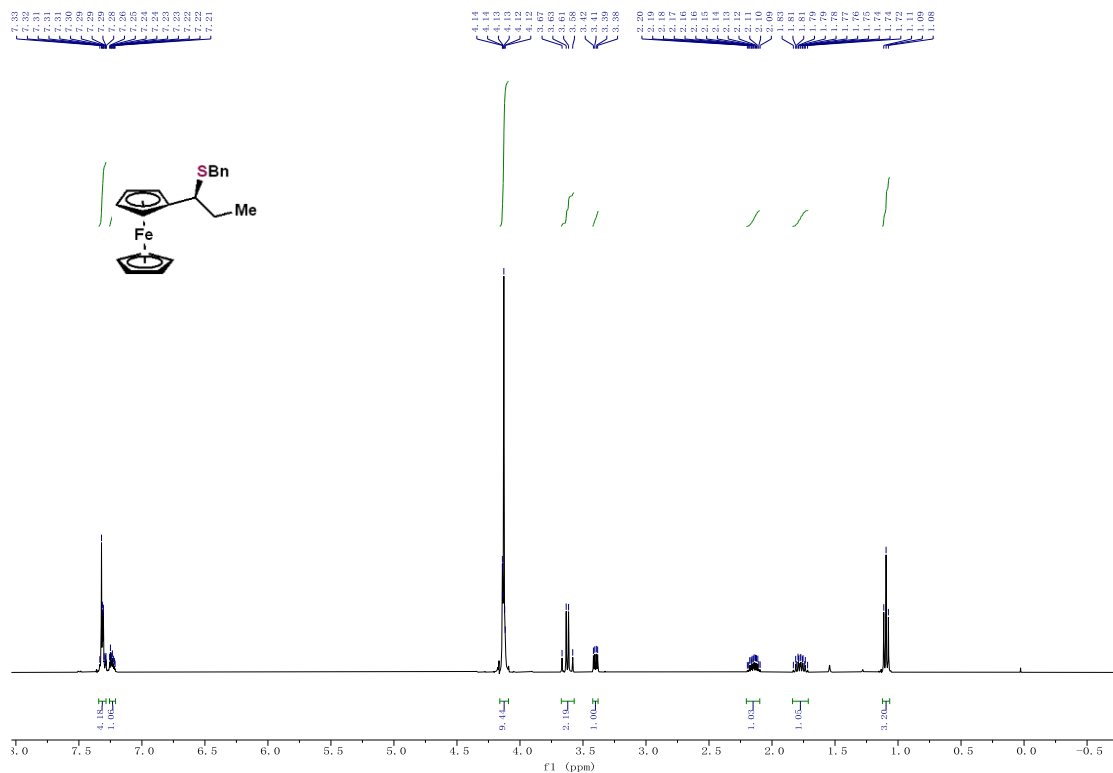

$^{13}\text{C}$  NMR (101 MHz,  $\text{CDCl}_3$ )

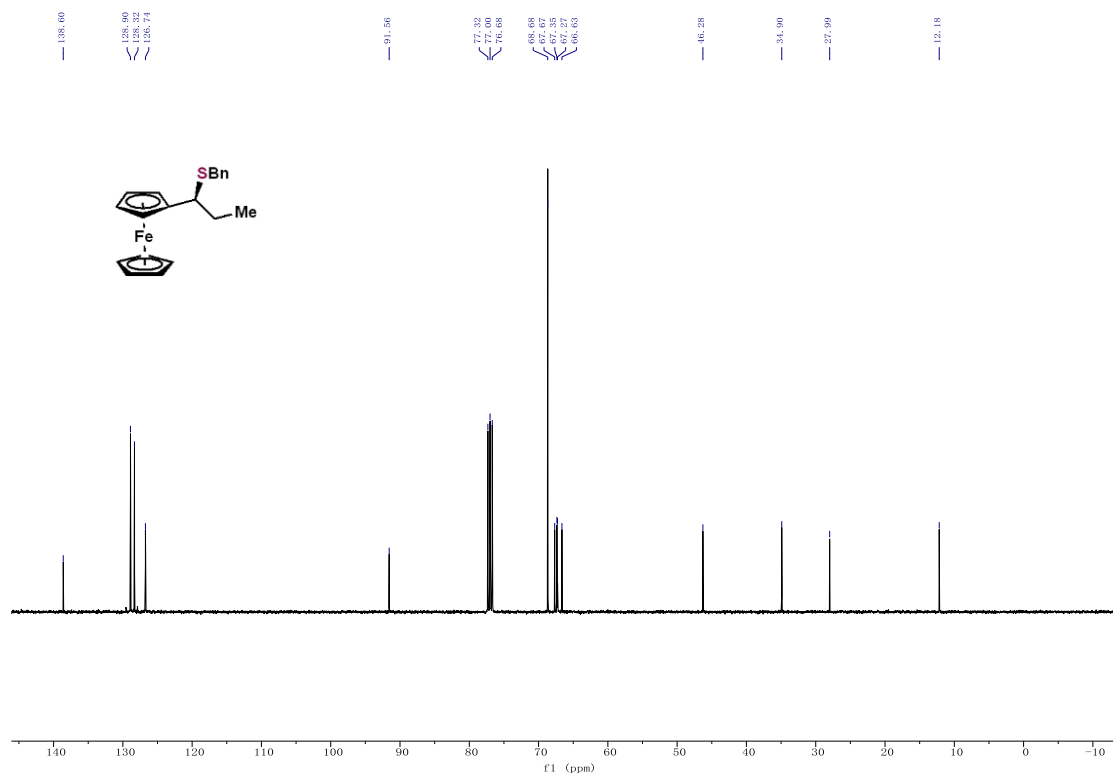

# (S)-1-(benzylthio)butylferrocene (28)

<sup>1</sup>H NMR (400 MHz, CDCl<sub>3</sub>)

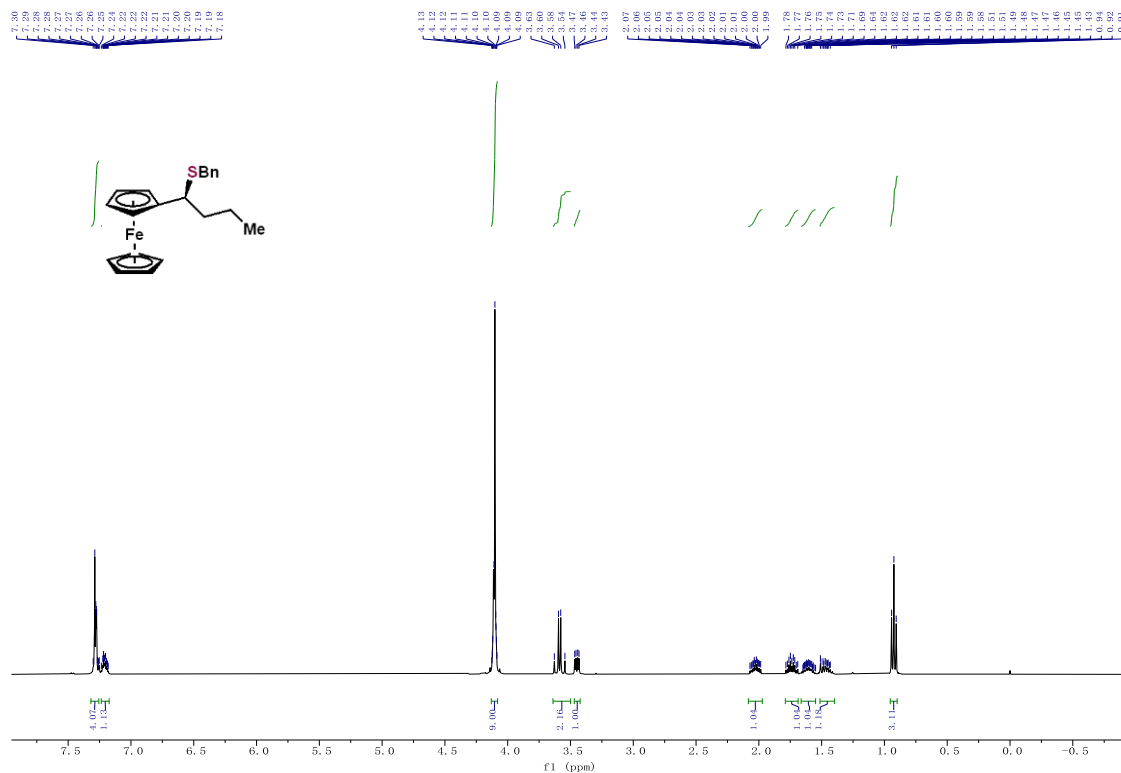

<sup>13</sup>C NMR (101 MHz, CDCl<sub>3</sub>)

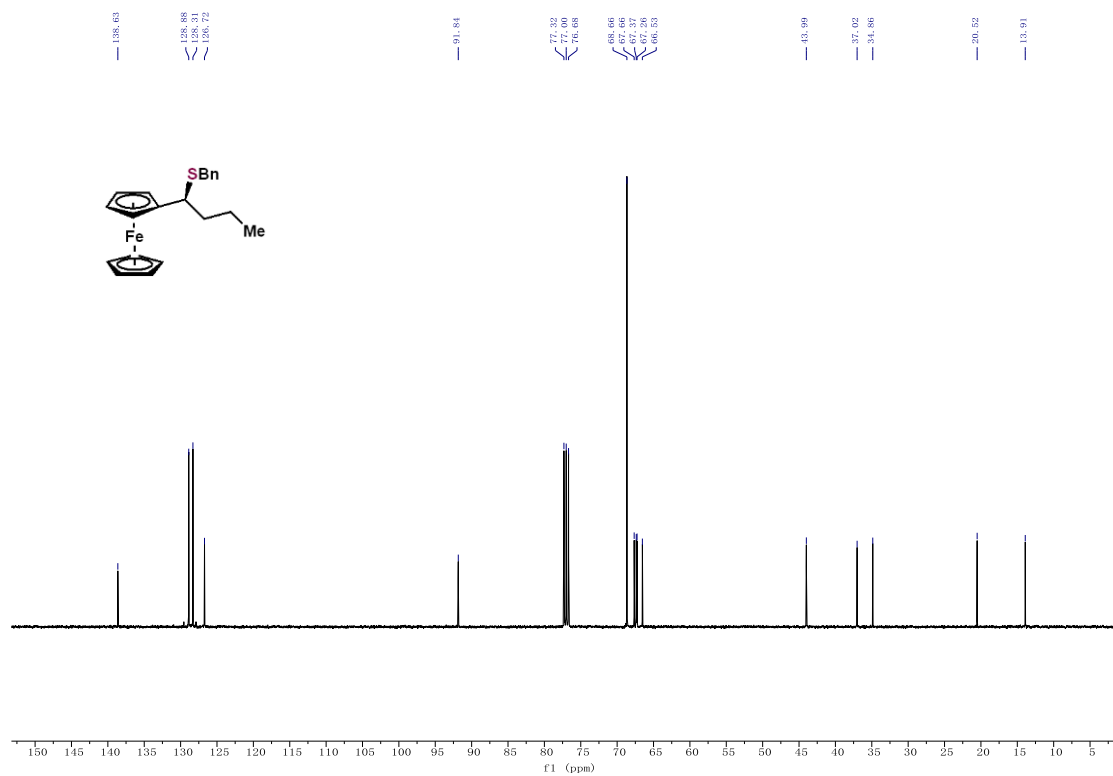

# (*S,pR*)-2-(1-Benzylthio)-1-diphenylphosphino-ferrocene (**29**)

<sup>1</sup>H NMR (400 MHz, CDCl<sub>3</sub>)

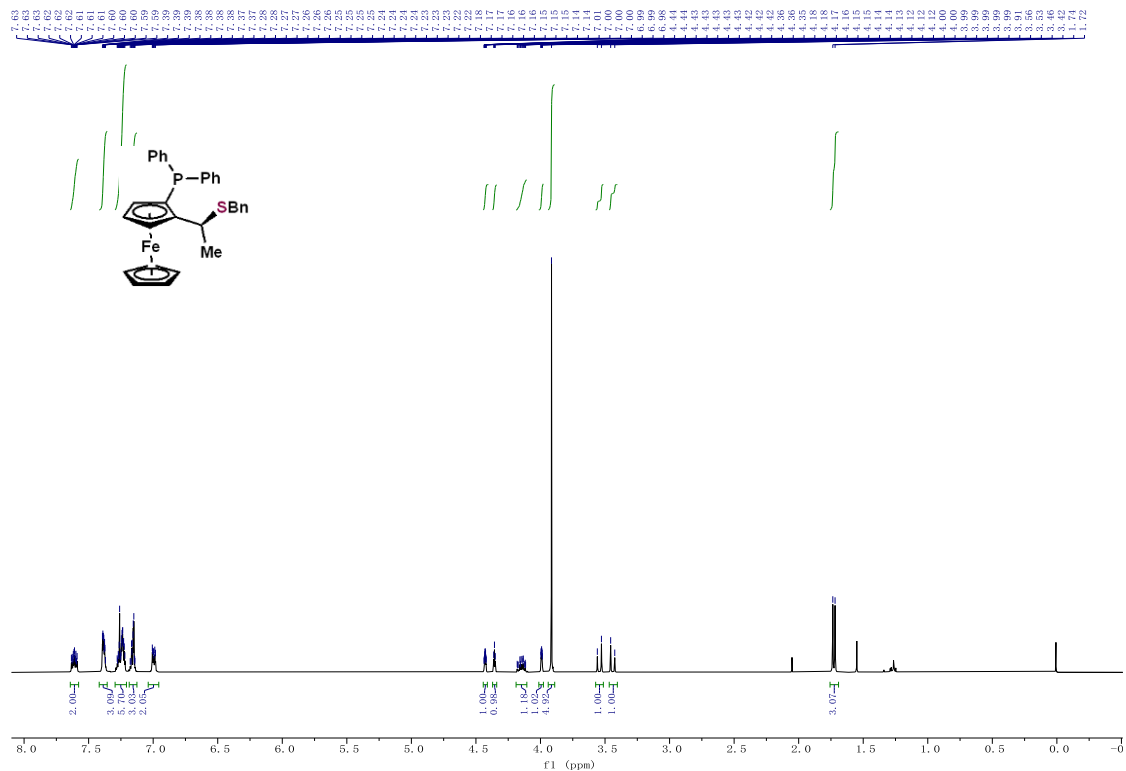

<sup>13</sup>C NMR (101 MHz, CDCl<sub>3</sub>)

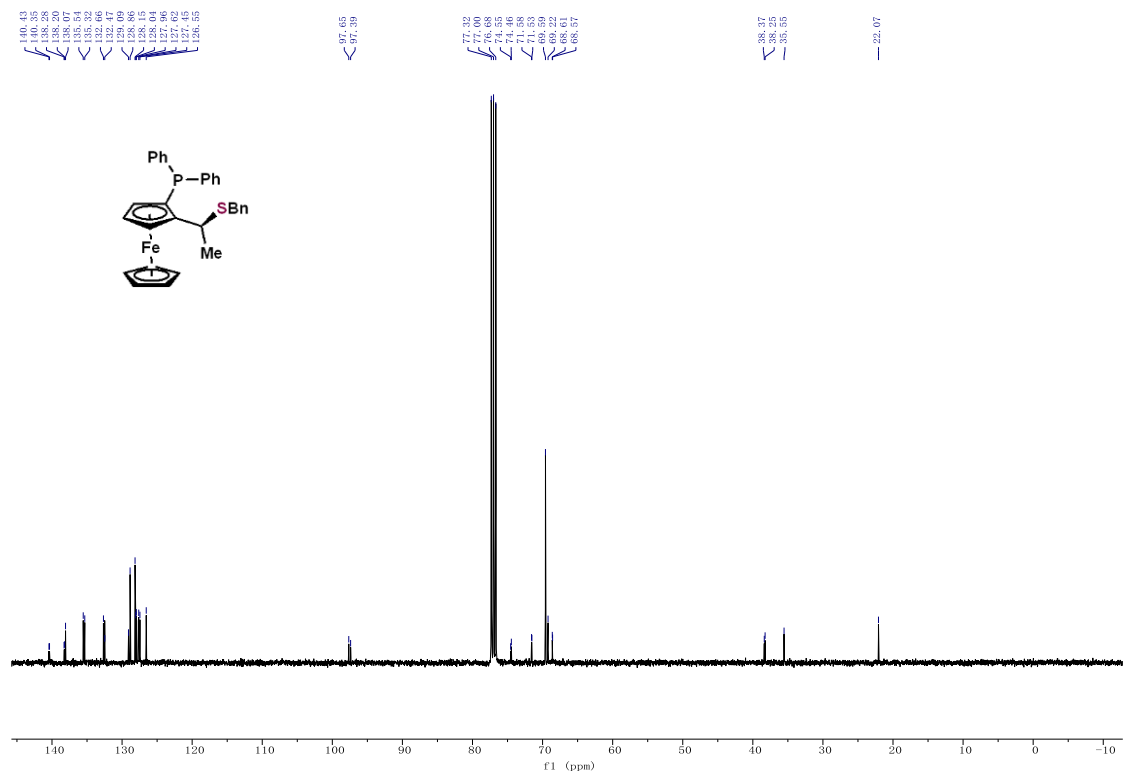

$^{31}\text{P}$  NMR (160 MHz,  $\text{CDCl}_3$ )

— 24.69

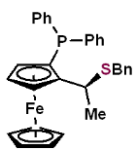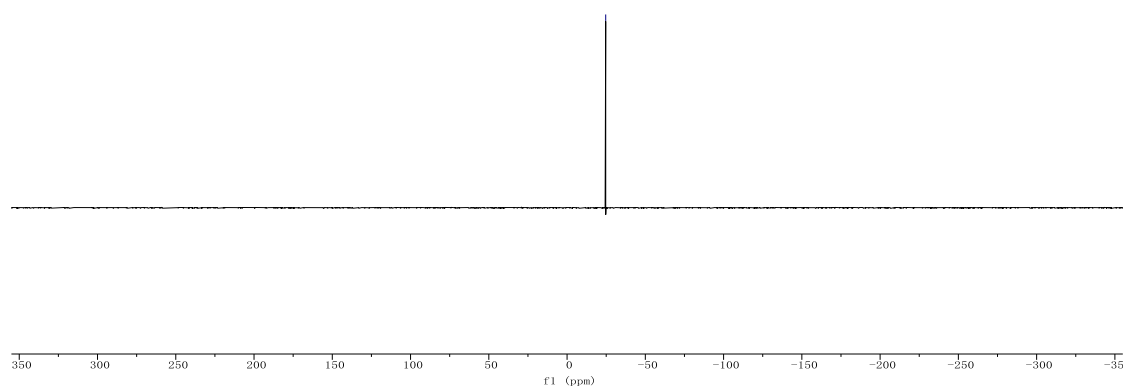

# (*S,pR*)-2-(1-Benzylthio)-1-phenylthio-ferrocene (30)

<sup>1</sup>H NMR (400 MHz, CDCl<sub>3</sub>)

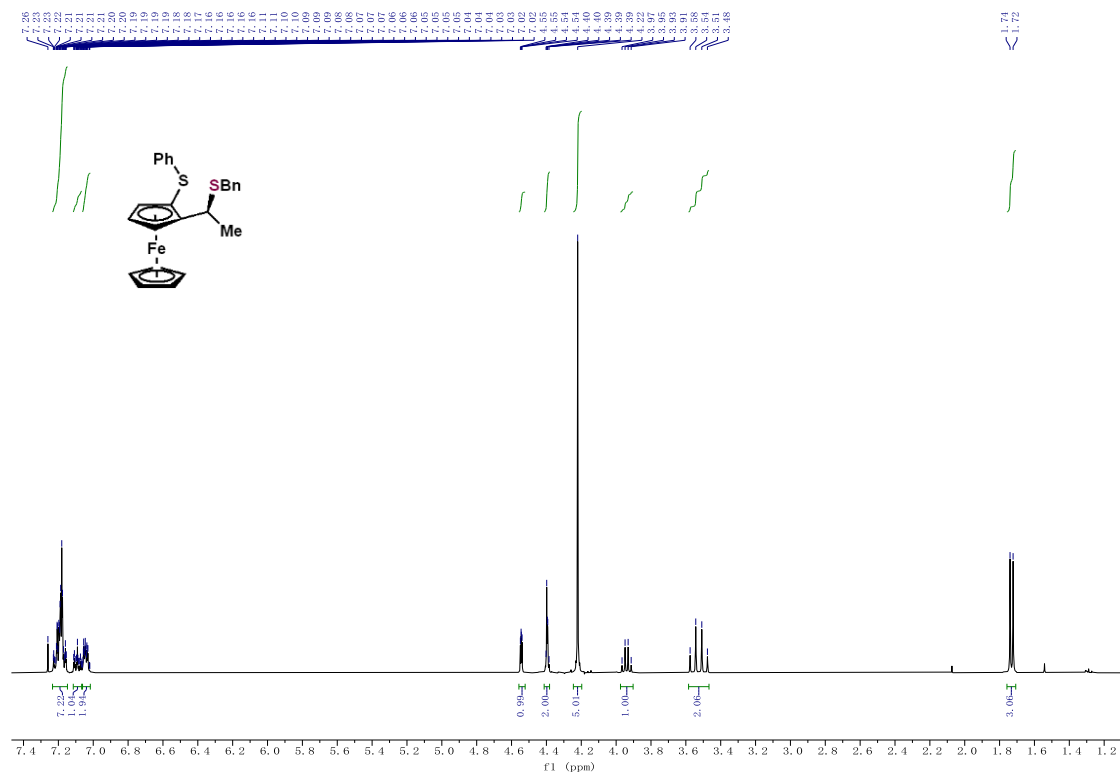

<sup>13</sup>C NMR (101 MHz, CDCl<sub>3</sub>)

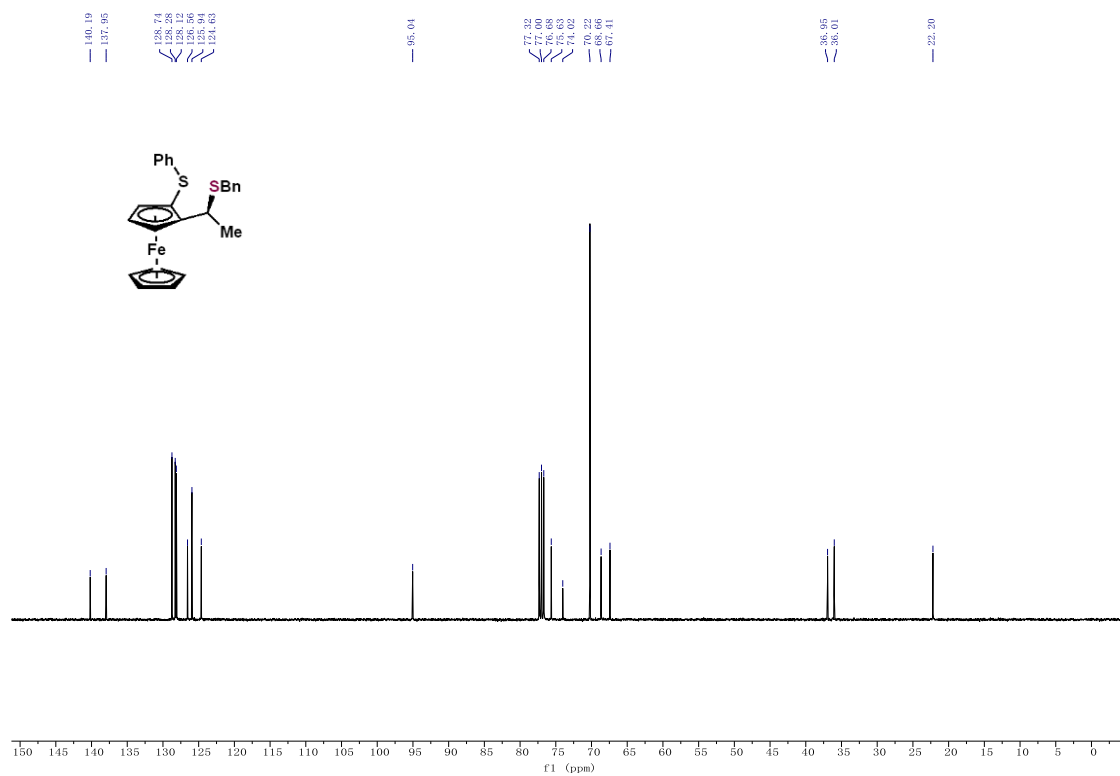

# (S)-2-(benzylthio)-2-phenylethylferrocene (31)

<sup>1</sup>H NMR (400 MHz, CDCl<sub>3</sub>)

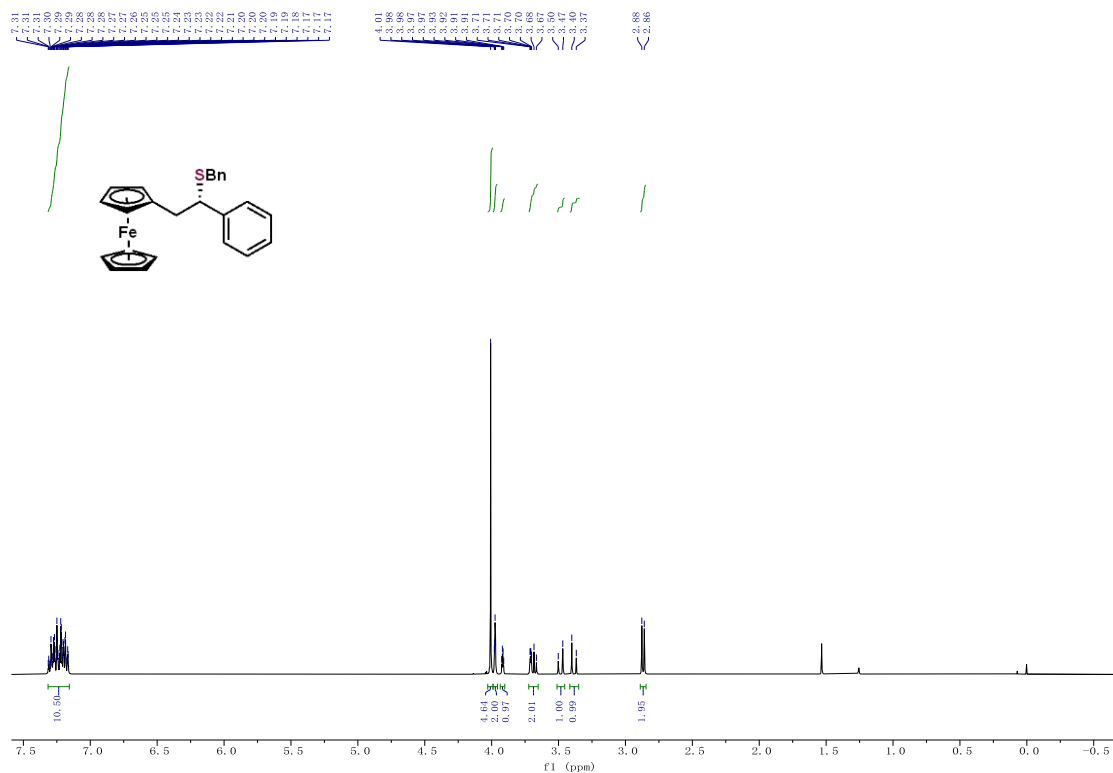

<sup>13</sup>C NMR (101 MHz, CDCl<sub>3</sub>)

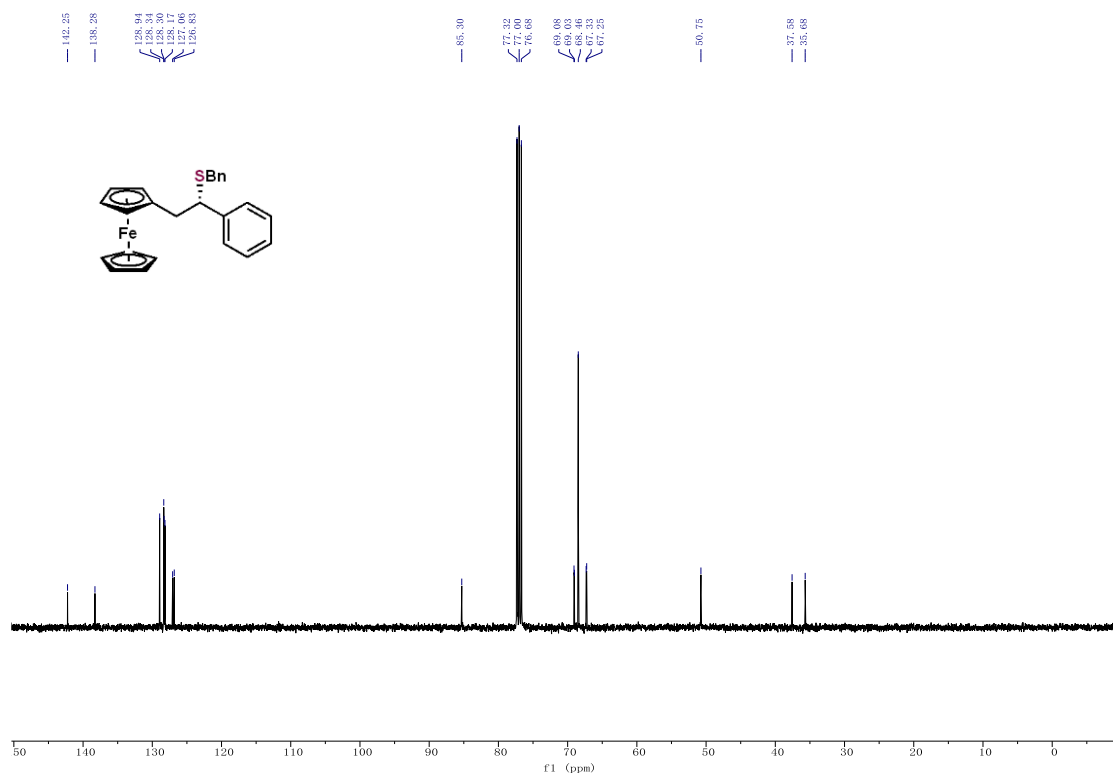



**(S)-1-(1-(benzylthio)ethyl)-1'-ethylferrocene (33)**

**<sup>1</sup>H NMR (400 MHz, CDCl<sub>3</sub>)**

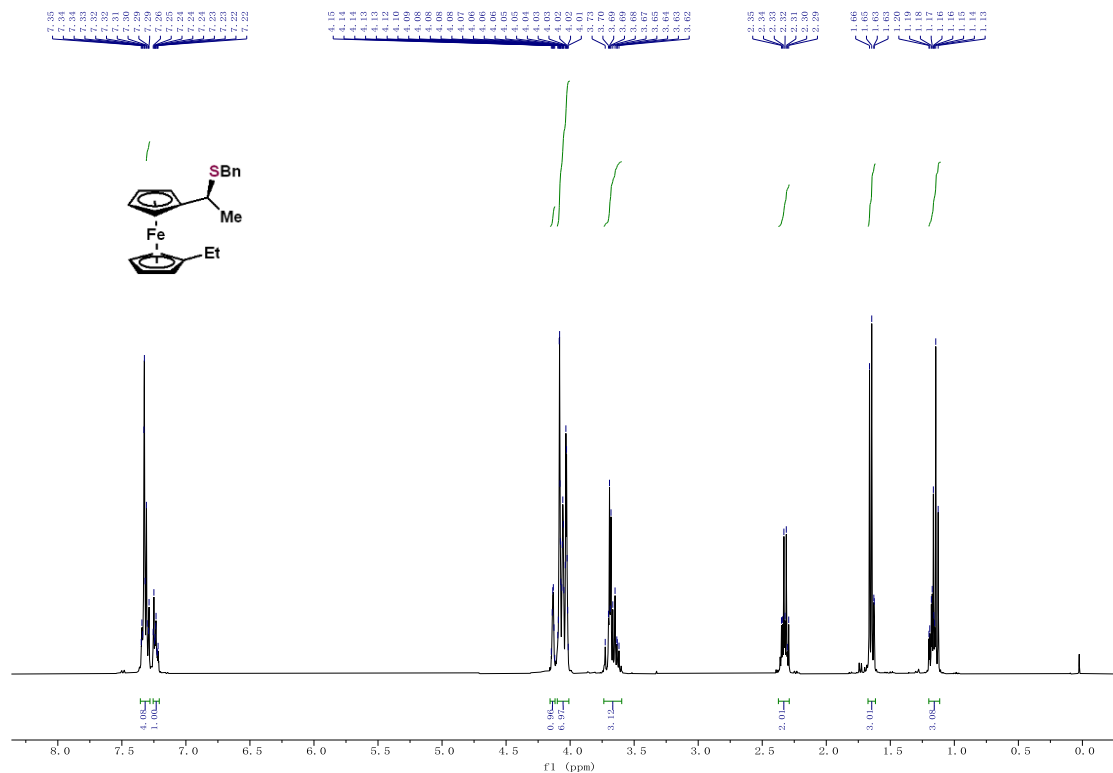

**<sup>13</sup>C NMR (101 MHz, CDCl<sub>3</sub>)**

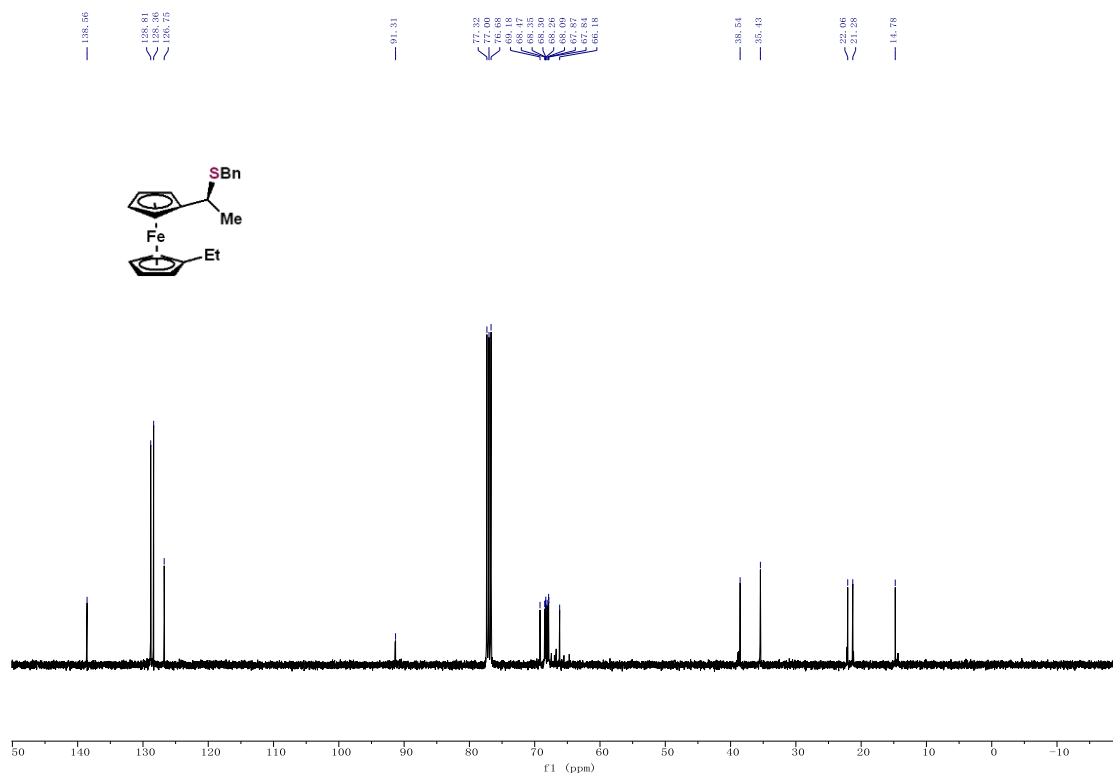

### (S)-1-(benzylthio)ethylruthenocene (34)

<sup>1</sup>H NMR (400 MHz, CDCl<sub>3</sub>)

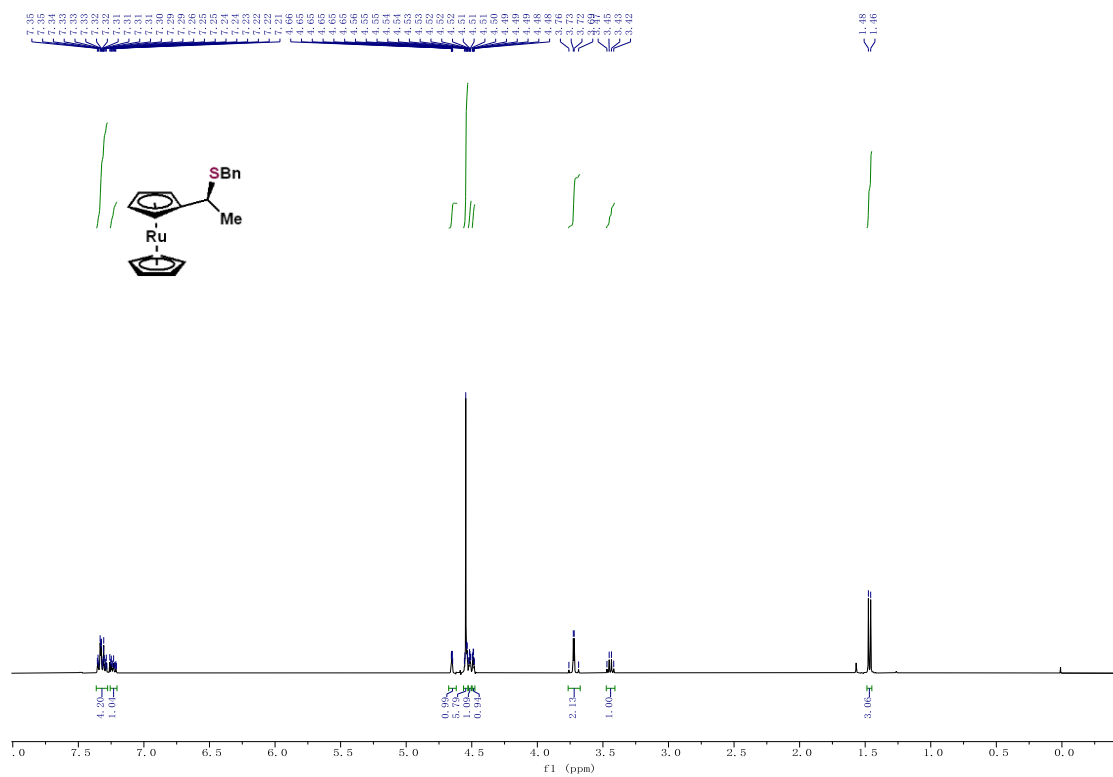

<sup>13</sup>C NMR (101 MHz, CDCl<sub>3</sub>)

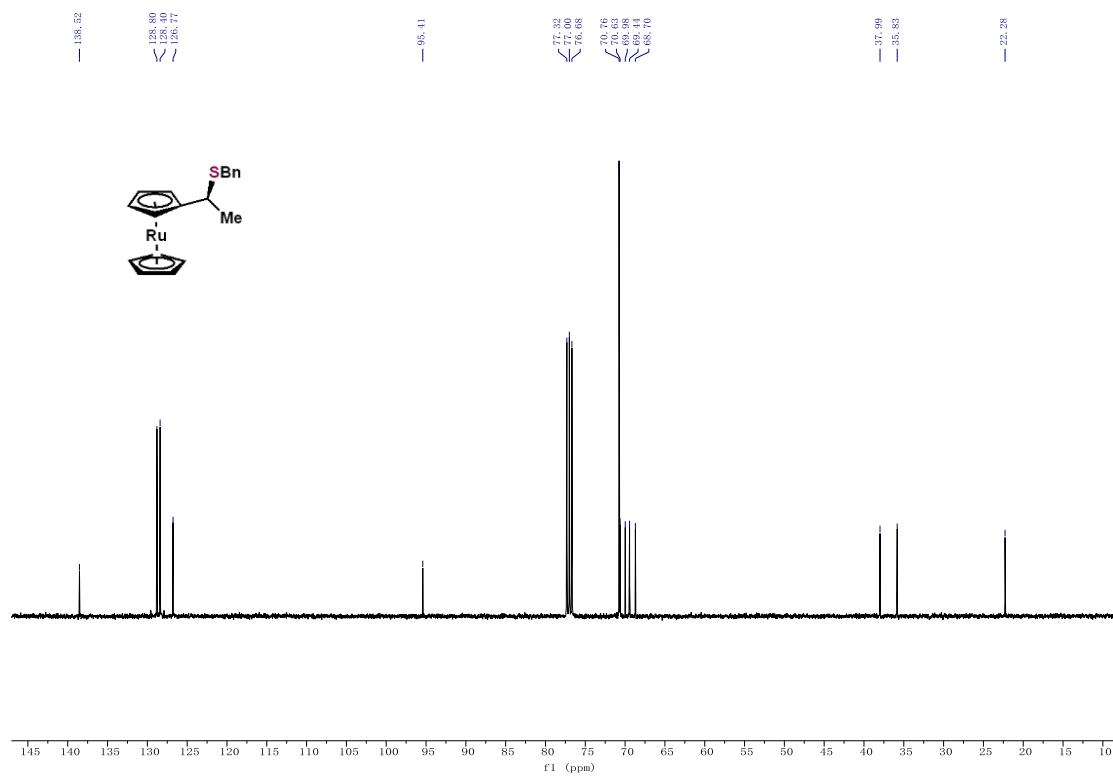

### (S)-1-(benzyloxy)ethylferrocene (35)

$^1\text{H}$  NMR (400 MHz,  $\text{CDCl}_3$ )

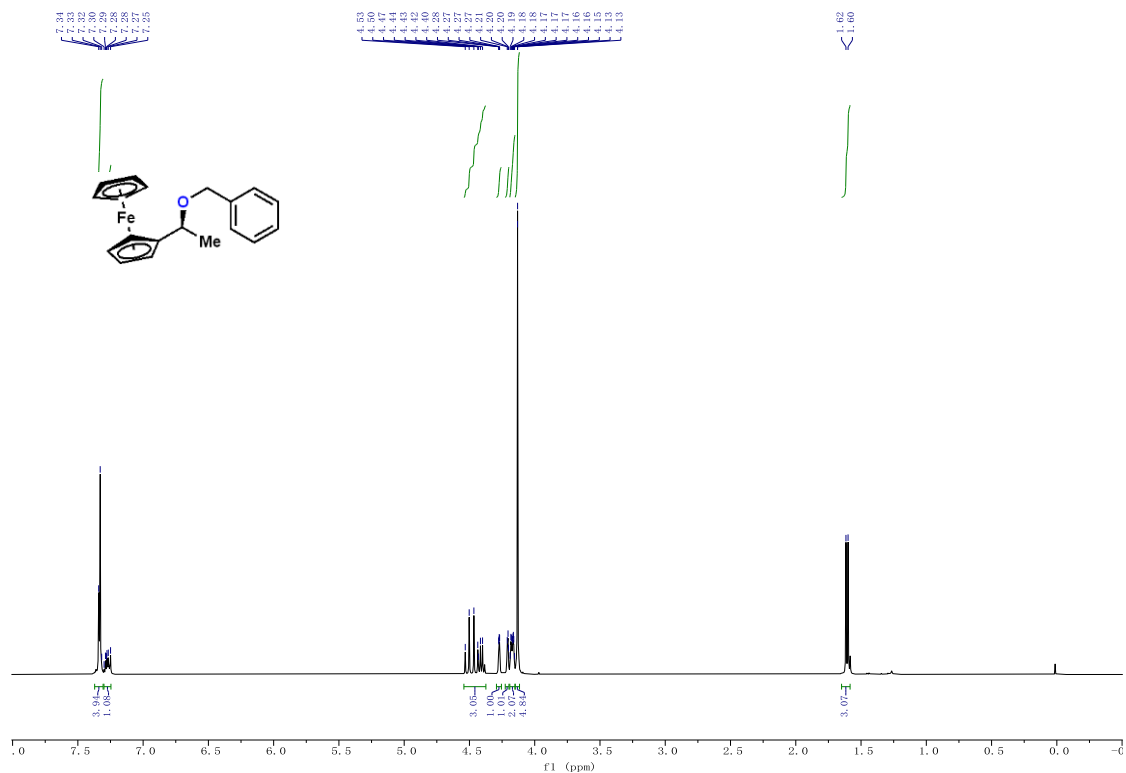

$^{13}\text{C}$  NMR (101 MHz,  $\text{CDCl}_3$ )

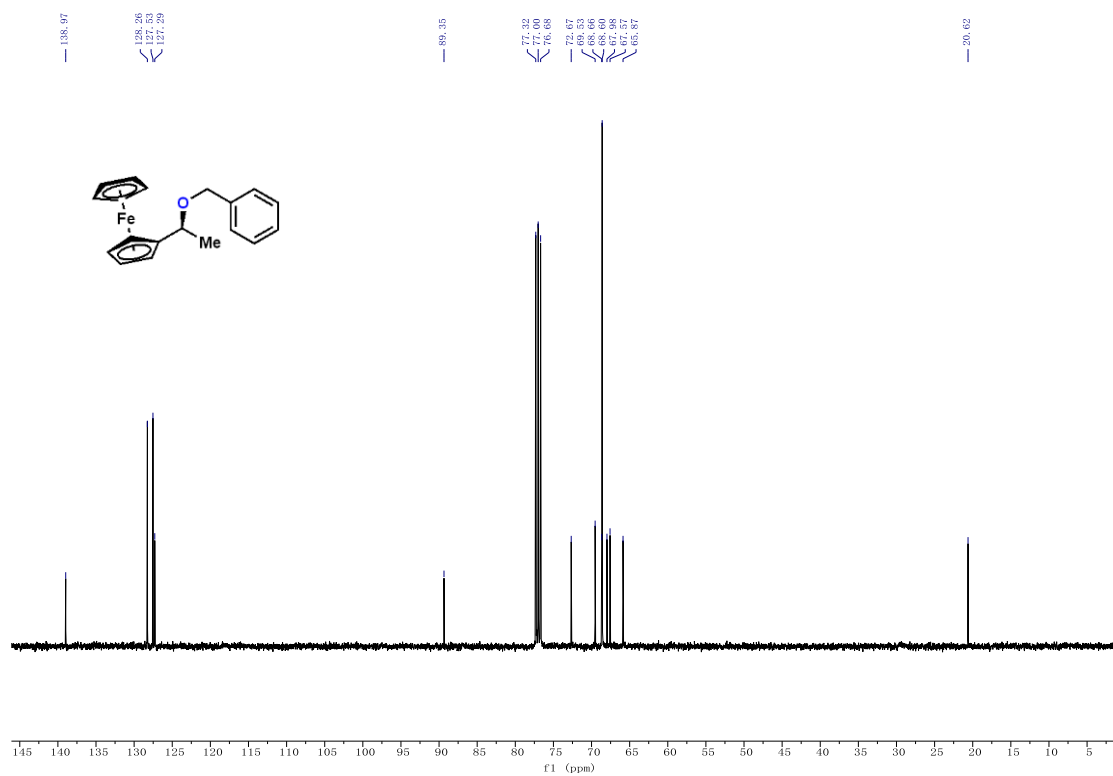

# (S)-1-((2-methylbenzyl)oxy)ethylferrocene (36)

$^1\text{H}$  NMR (400 MHz,  $\text{CDCl}_3$ )

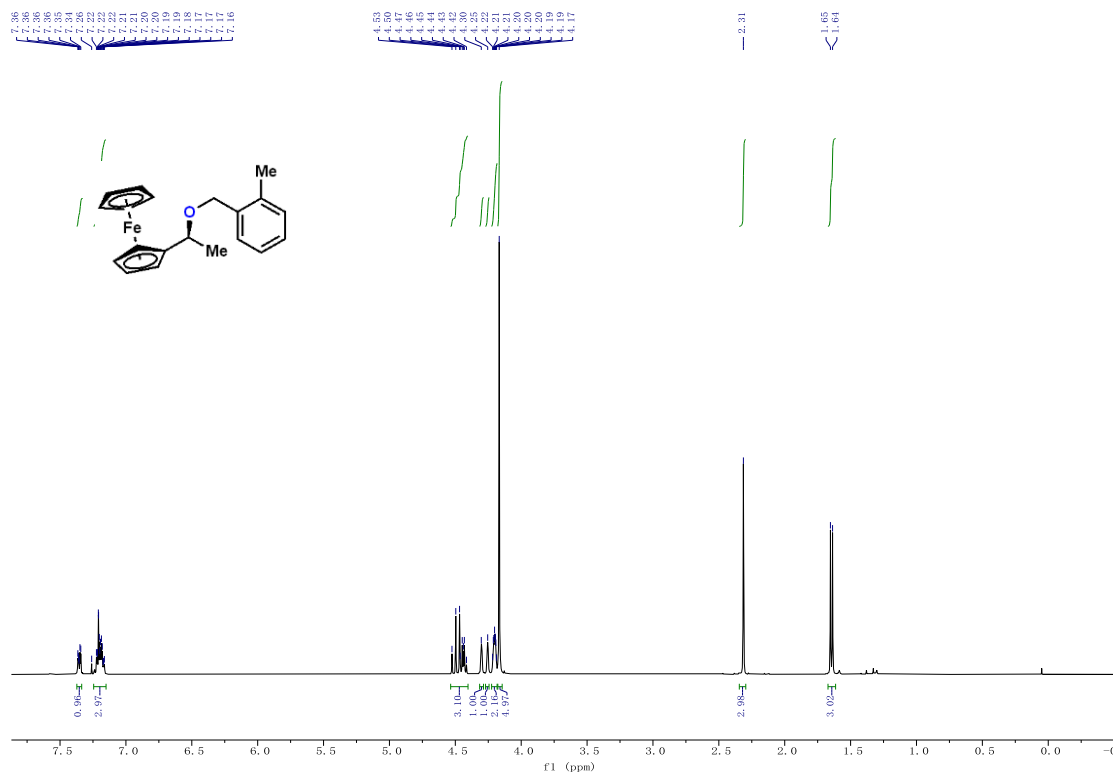

$^{13}\text{C}$  NMR (101 MHz,  $\text{CDCl}_3$ )

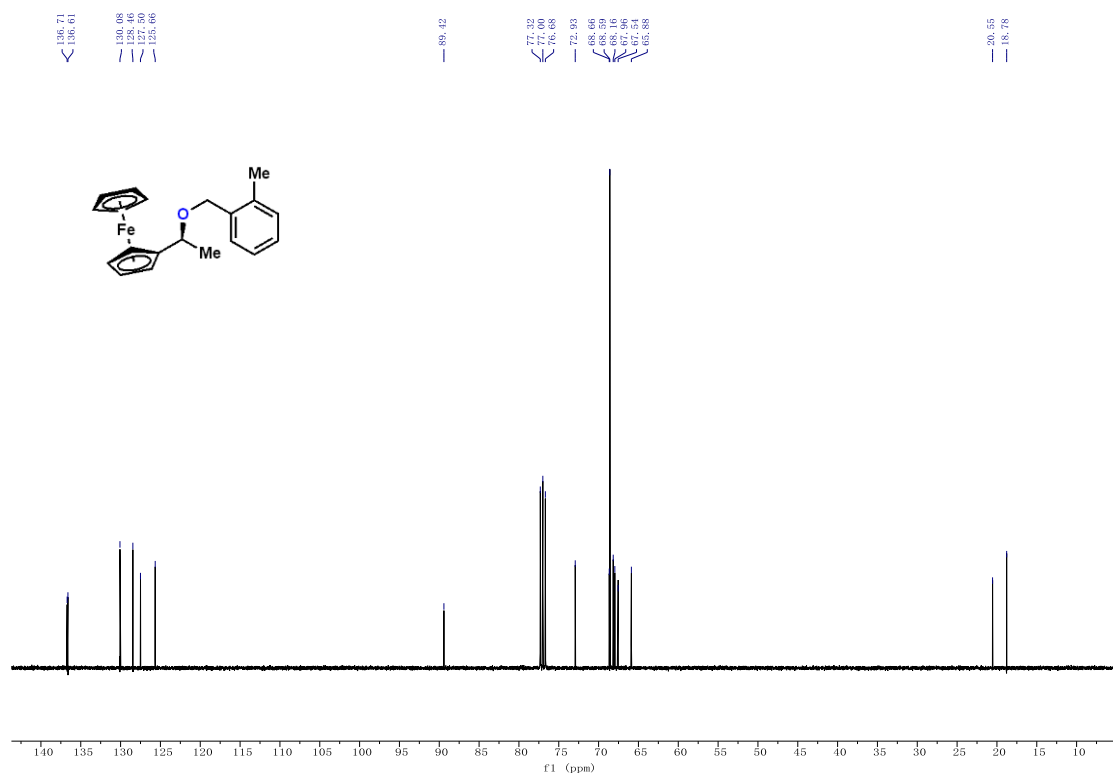

# (S)-1-((4-methylbenzyl)oxy)ethylferrocene (37)

$^1\text{H}$  NMR (400 MHz,  $\text{CDCl}_3$ )

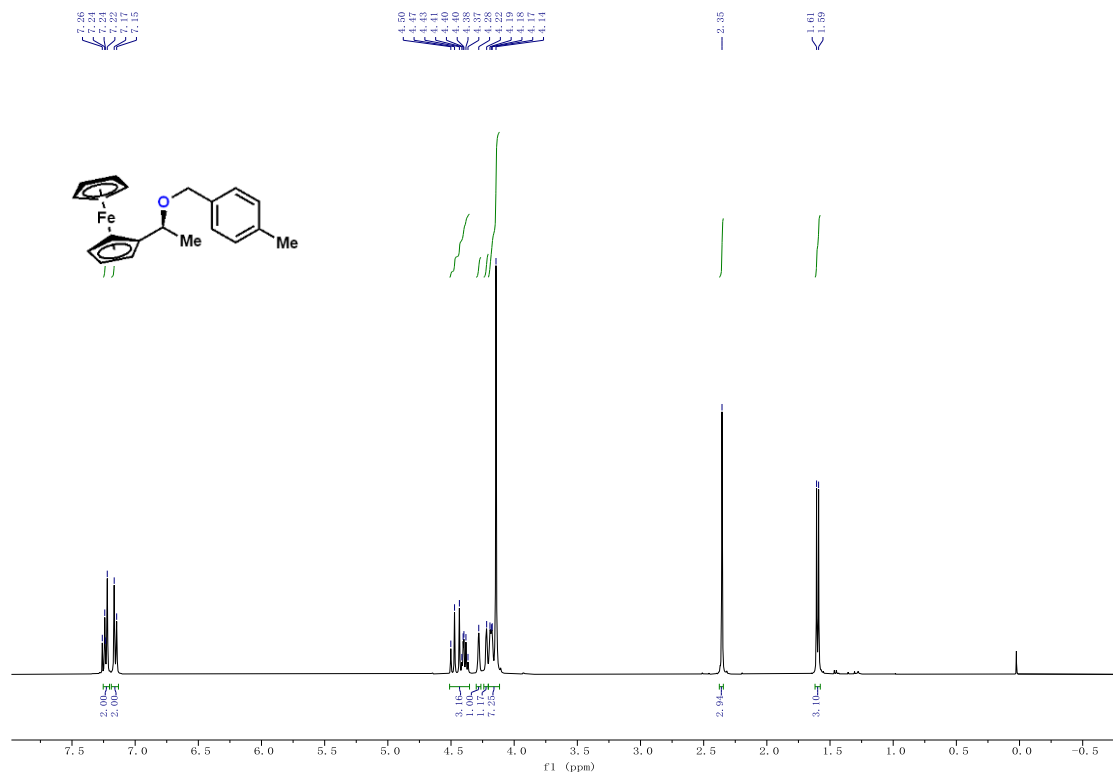

$^{13}\text{C}$  NMR (101 MHz,  $\text{CDCl}_3$ )

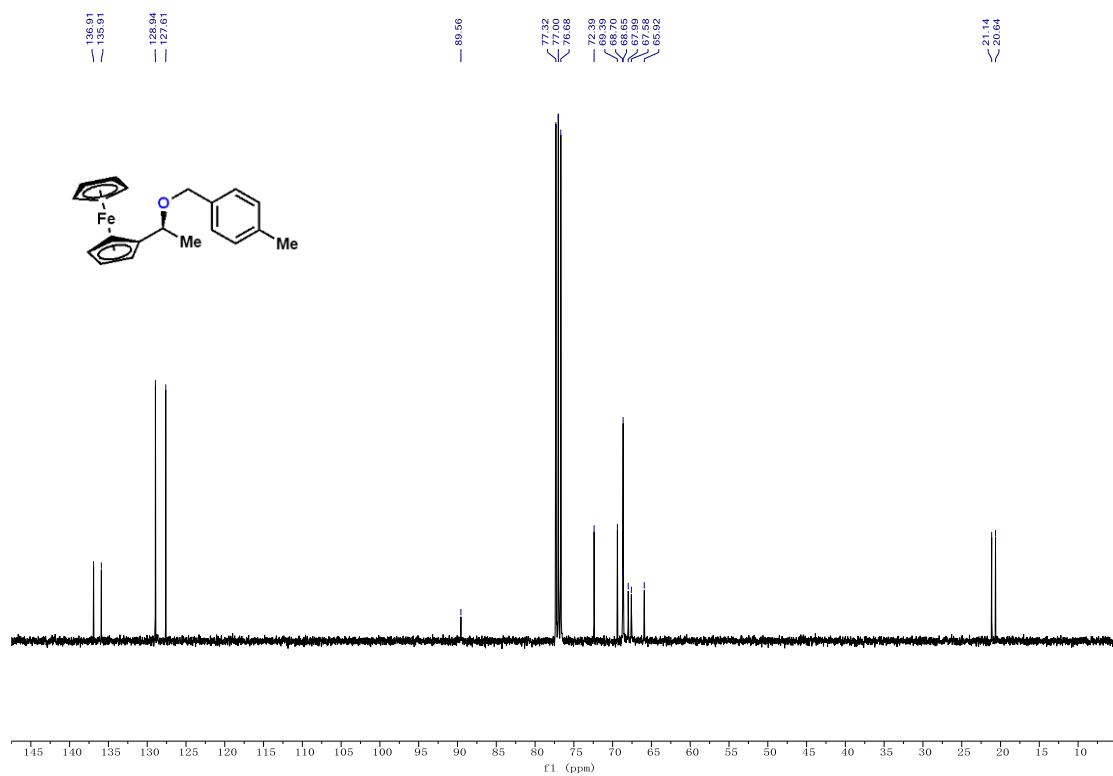

# (S)-1-((4-methoxybenzyl)oxy)ethylferrocene (38)

<sup>1</sup>H NMR (400 MHz, CDCl<sub>3</sub>)

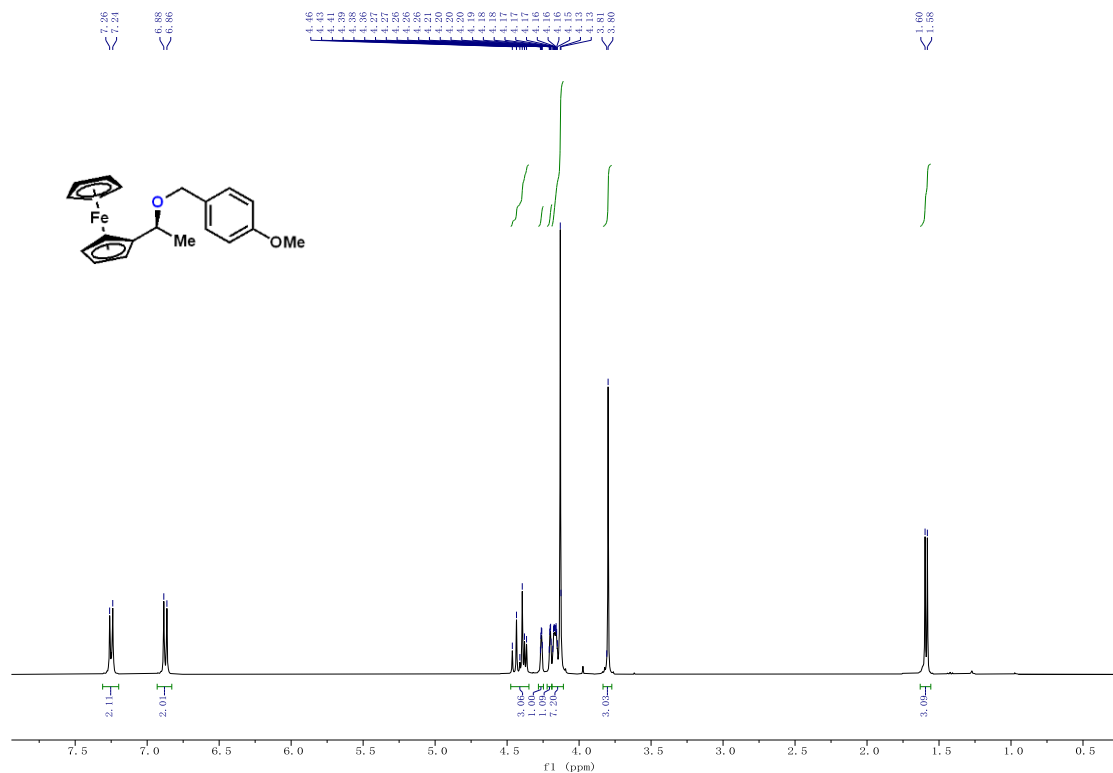

<sup>13</sup>C NMR (101 MHz, CDCl<sub>3</sub>)

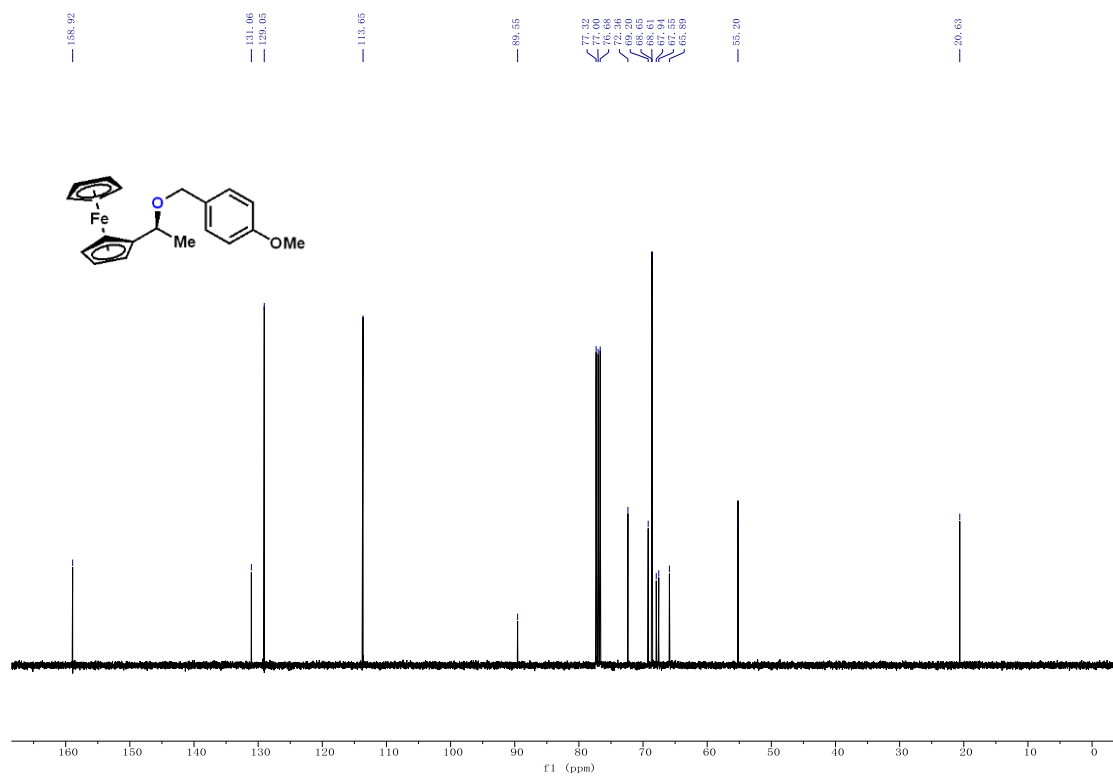

# (S)-1-((4-(trifluoromethyl)benzyl)oxy)ethylferrocene (39)

<sup>1</sup>H NMR (400 MHz, CDCl<sub>3</sub>)

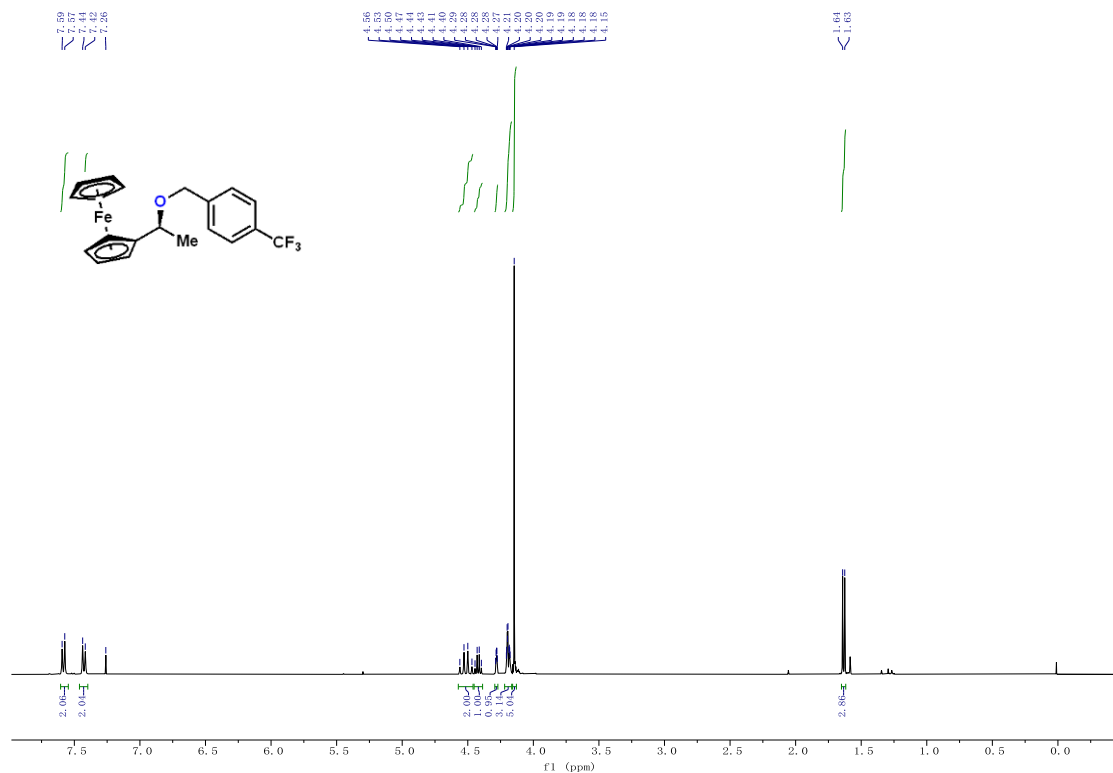

<sup>13</sup>C NMR (101 MHz, CDCl<sub>3</sub>)

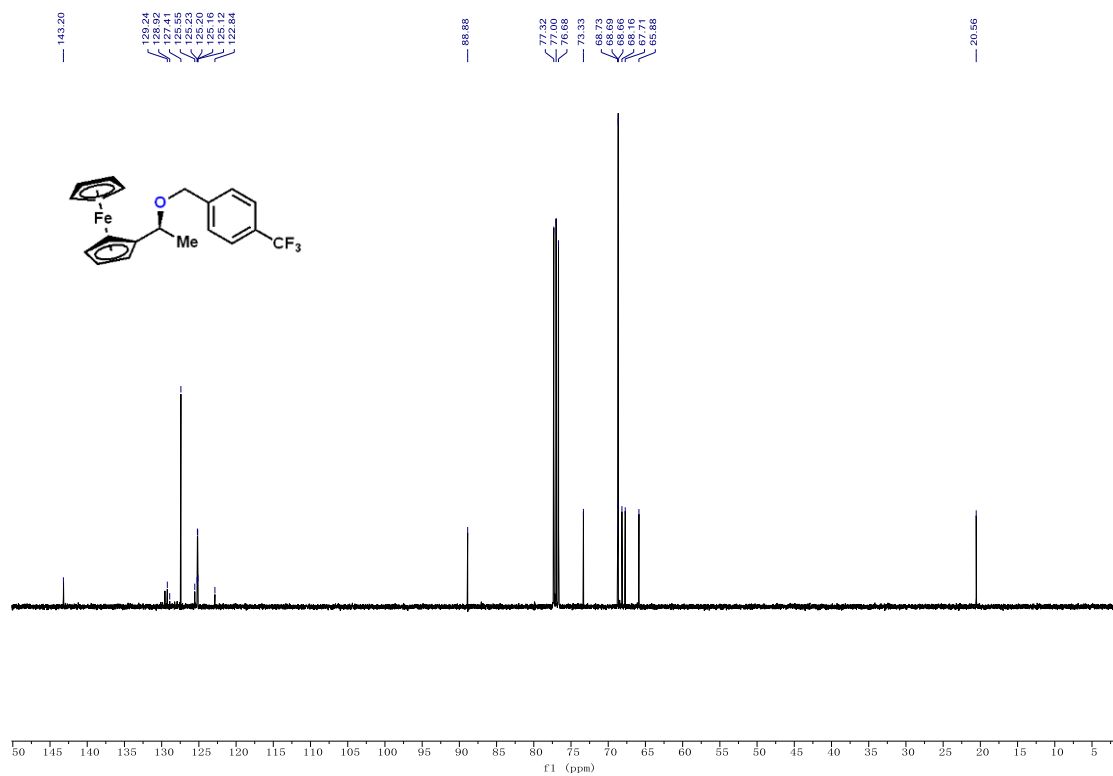

**<sup>19</sup>F NMR (376 MHz, CDCl<sub>3</sub>)**

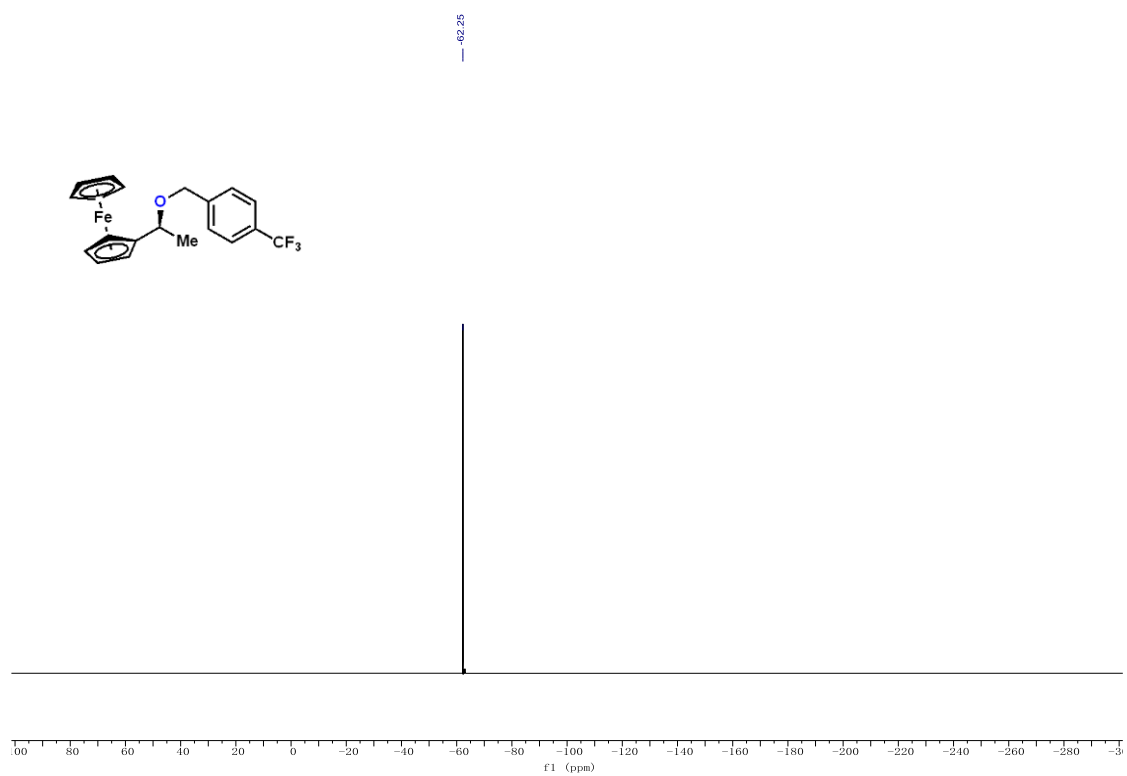

# (S)-1-(phenylselanyl)ethylferrocene (40)

<sup>1</sup>H NMR (400 MHz, CDCl<sub>3</sub>)

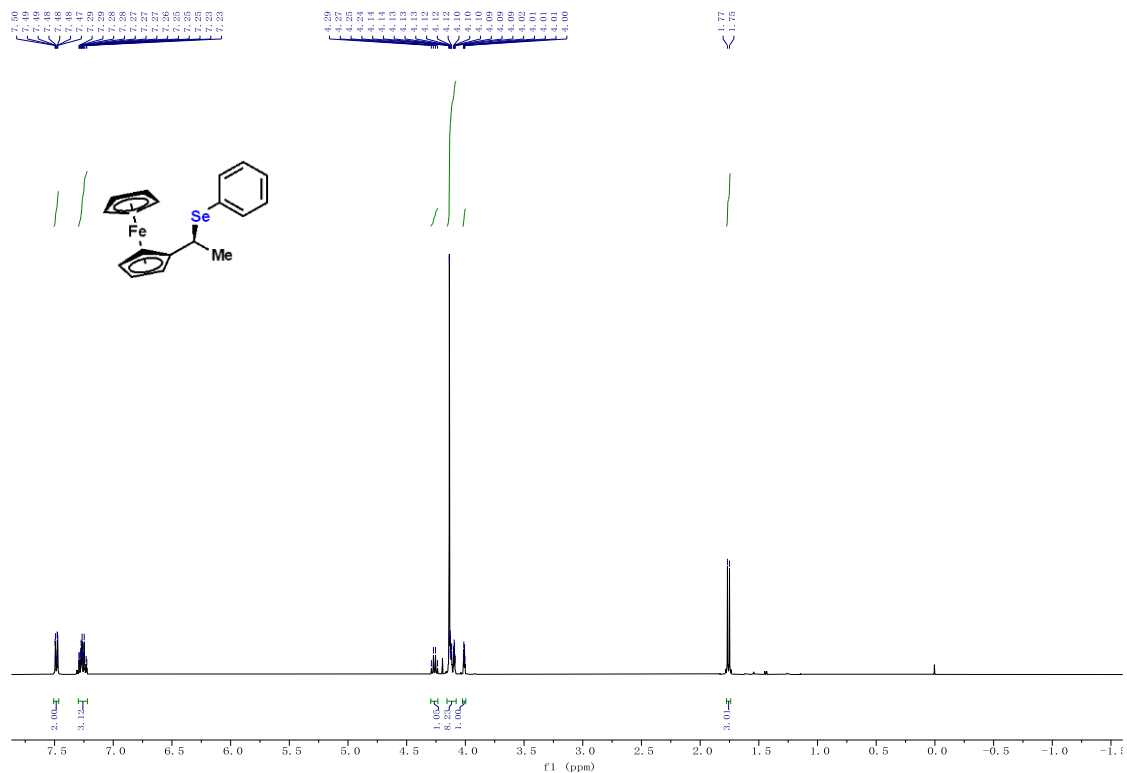

<sup>13</sup>C NMR (101 MHz, CDCl<sub>3</sub>)

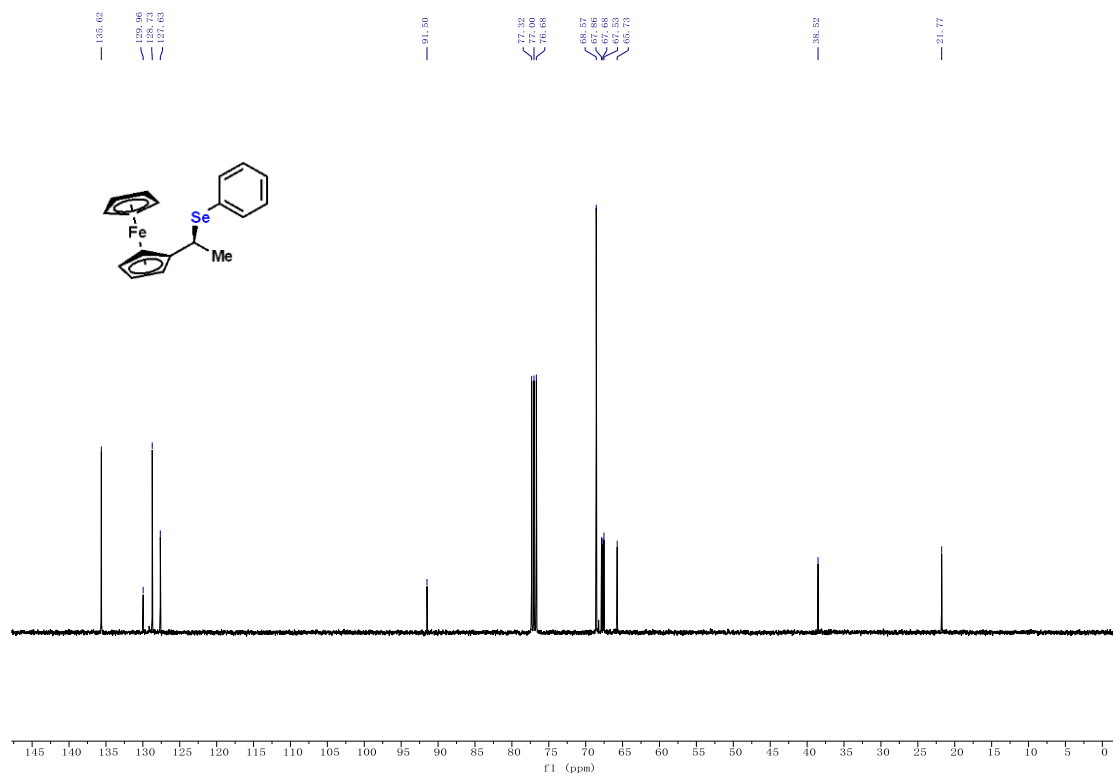

# (S)-1-(naphthalen-1-ylselanyl)ethylferrocene (41)

<sup>1</sup>H NMR (400 MHz, CDCl<sub>3</sub>)

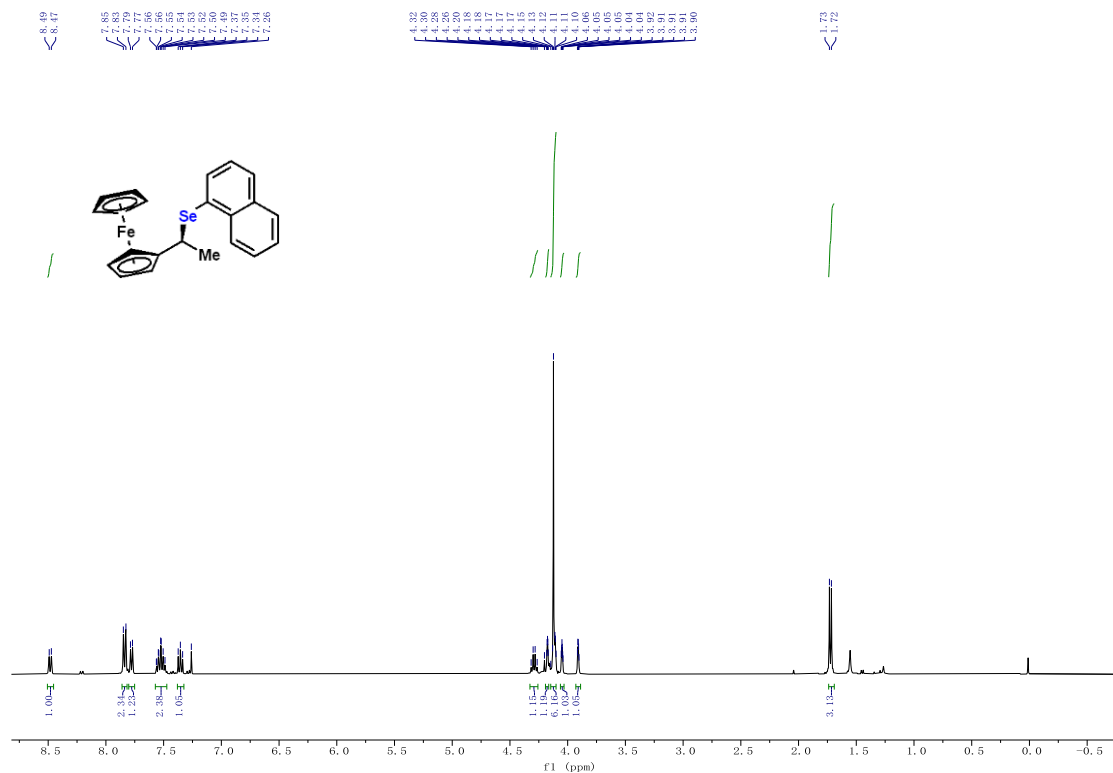

<sup>13</sup>C NMR (101 MHz, CDCl<sub>3</sub>)

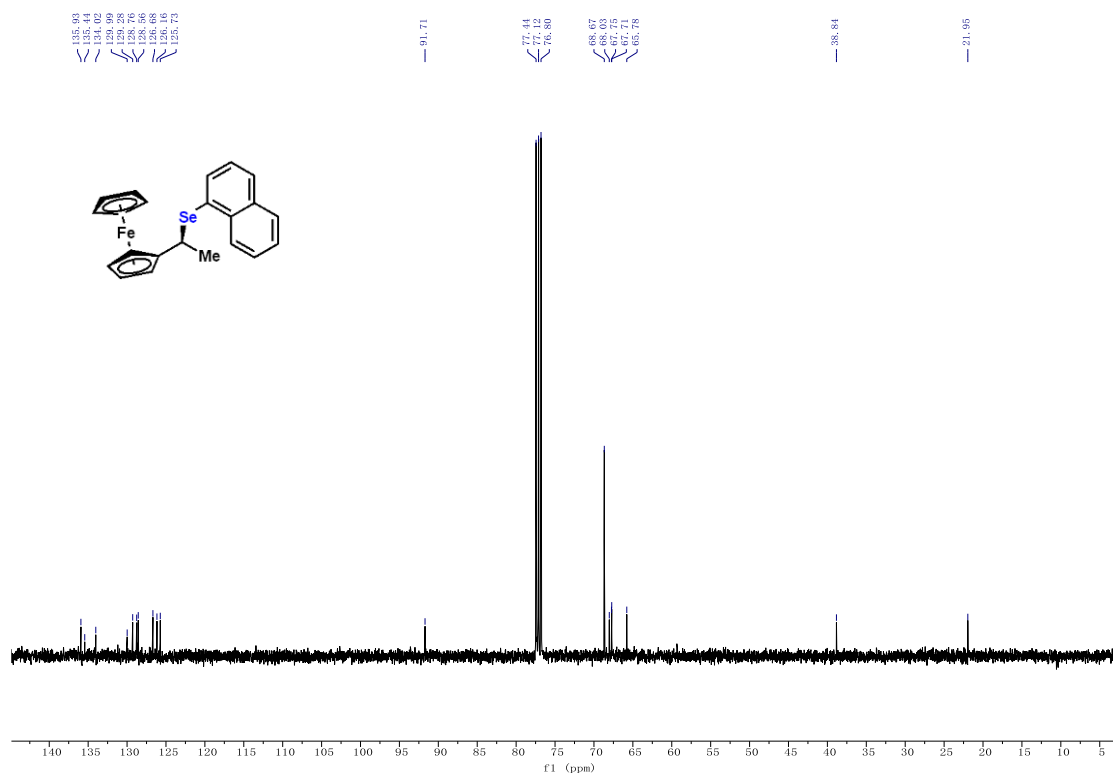

# (S)-N-(1-(ferrocene-2-yl)ethyl)benzenesulfonamide (42)

<sup>1</sup>H NMR (400 MHz, CDCl<sub>3</sub>)

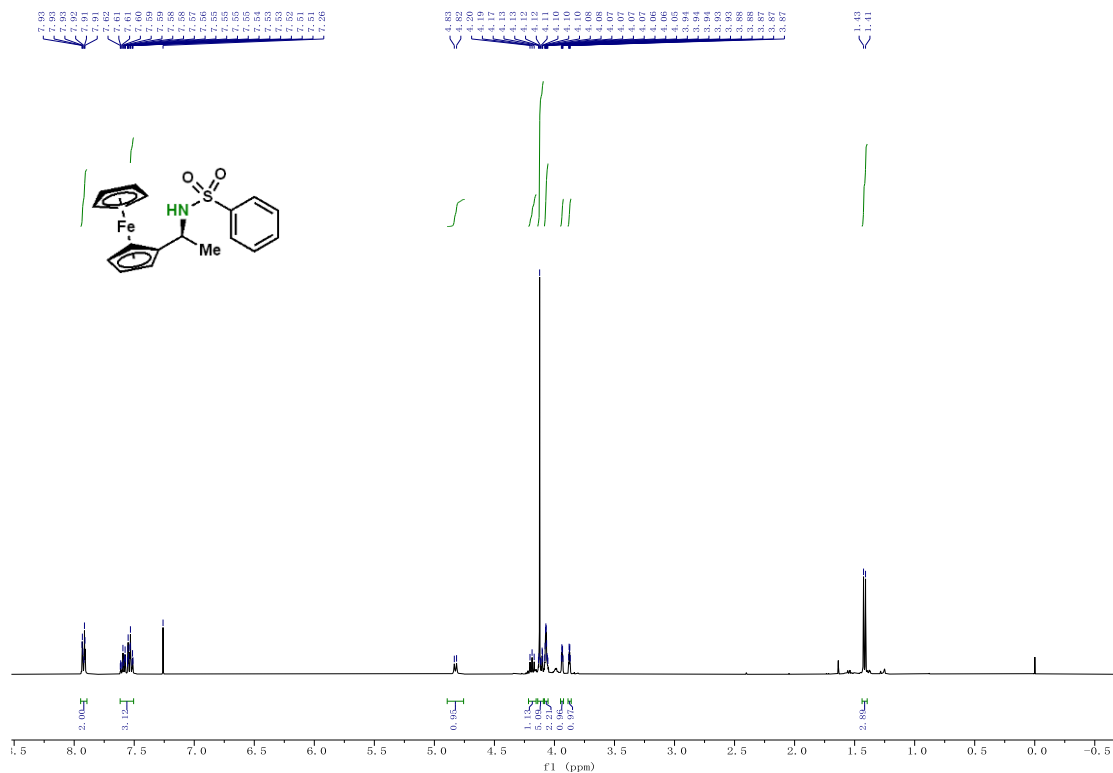

<sup>13</sup>C NMR (101 MHz, CDCl<sub>3</sub>)

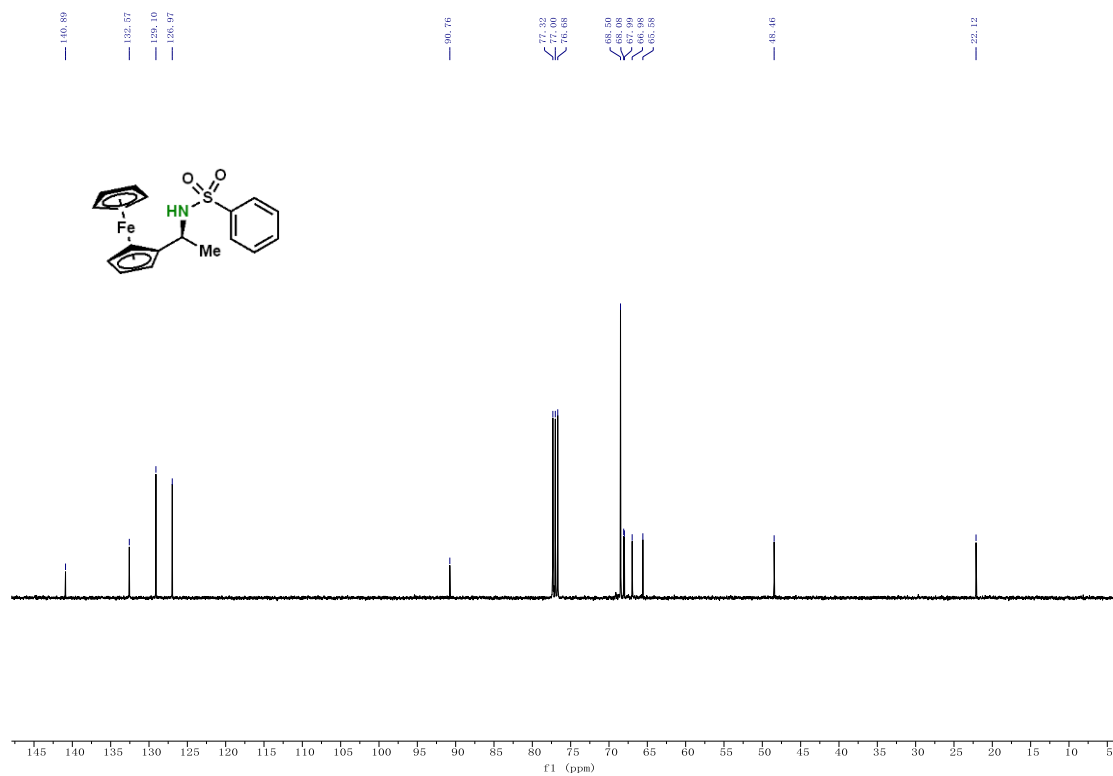



# (S)-4-methoxy-N-(1-(ferrocene-2-yl)ethyl)benzenesulfonamide (44)

<sup>1</sup>H NMR (400 MHz, CDCl<sub>3</sub>)

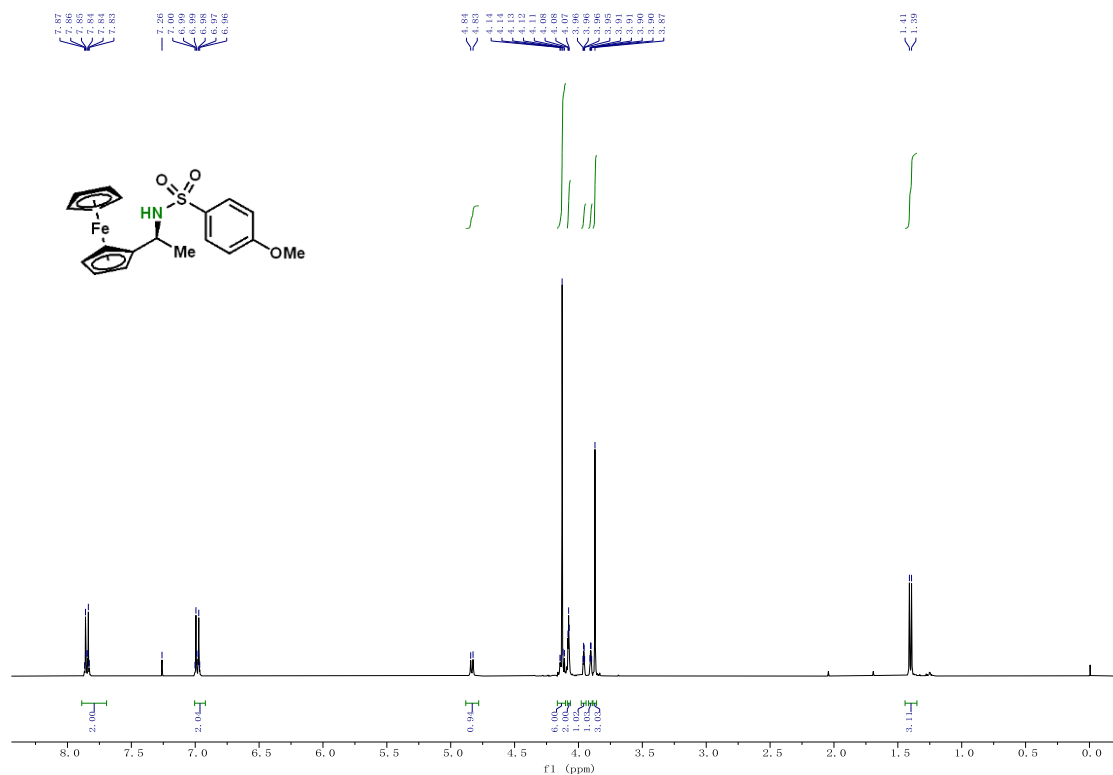

<sup>13</sup>C NMR (101 MHz, CDCl<sub>3</sub>)

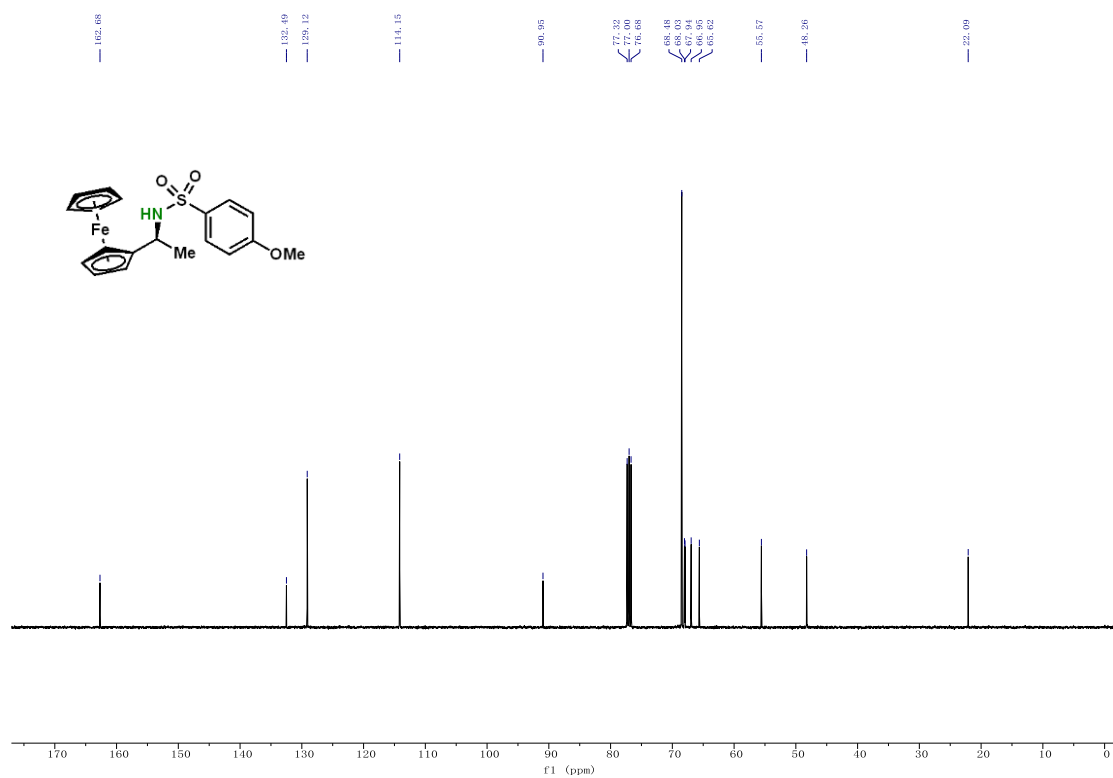

# (S)-4-(tert-butyl)-N-(1-(ferrocene-2-yl)ethyl)benzenesulfonamide (45)

<sup>1</sup>H NMR (400 MHz, CDCl<sub>3</sub>)

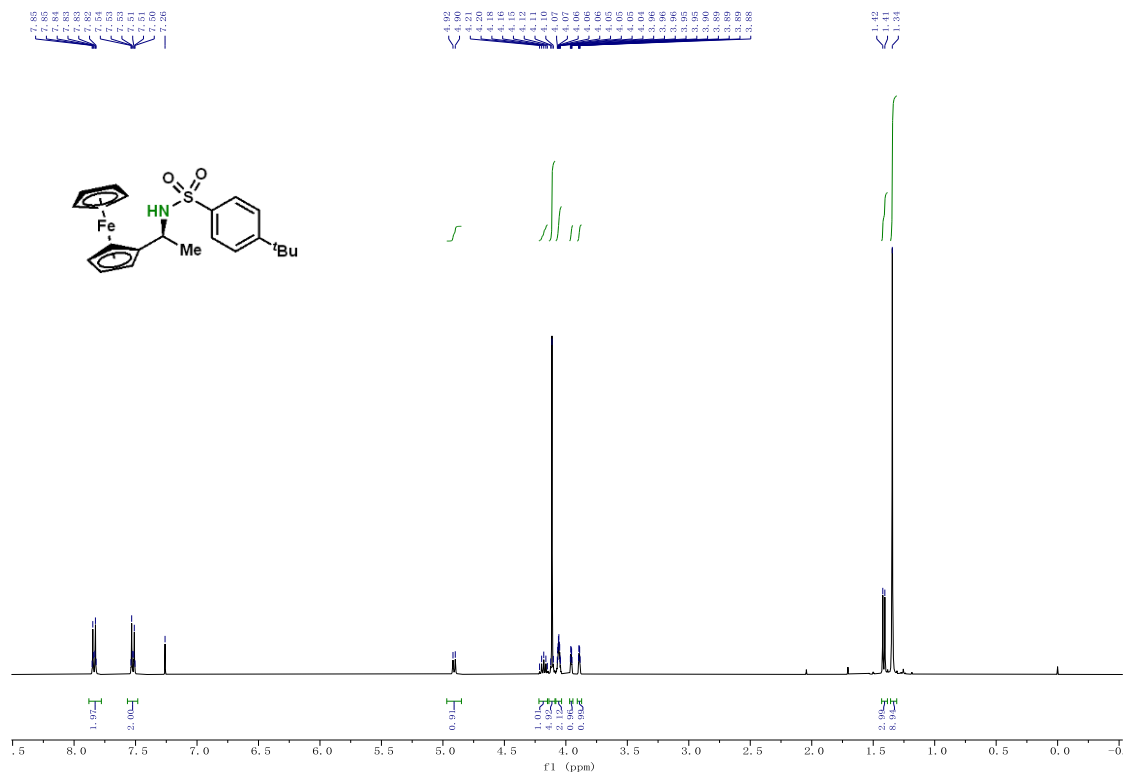

<sup>13</sup>C NMR (101 MHz, CDCl<sub>3</sub>)

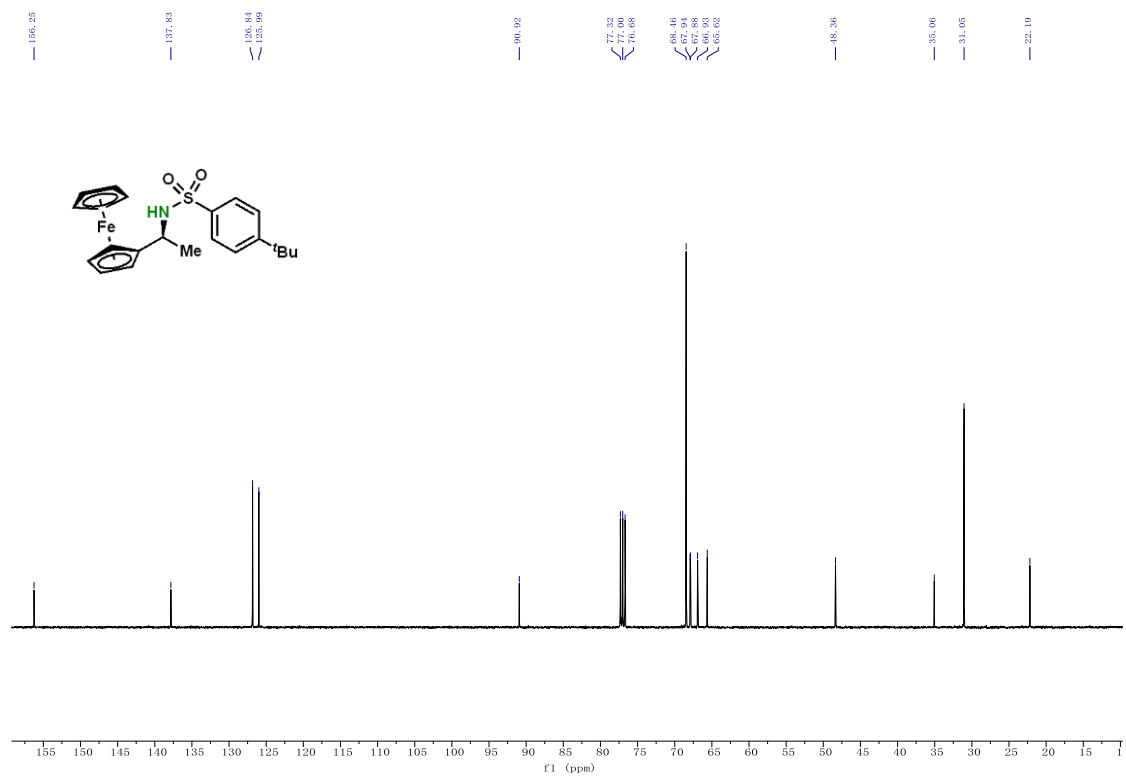



**<sup>19</sup>F NMR (376 MHz, CDCl<sub>3</sub>)**

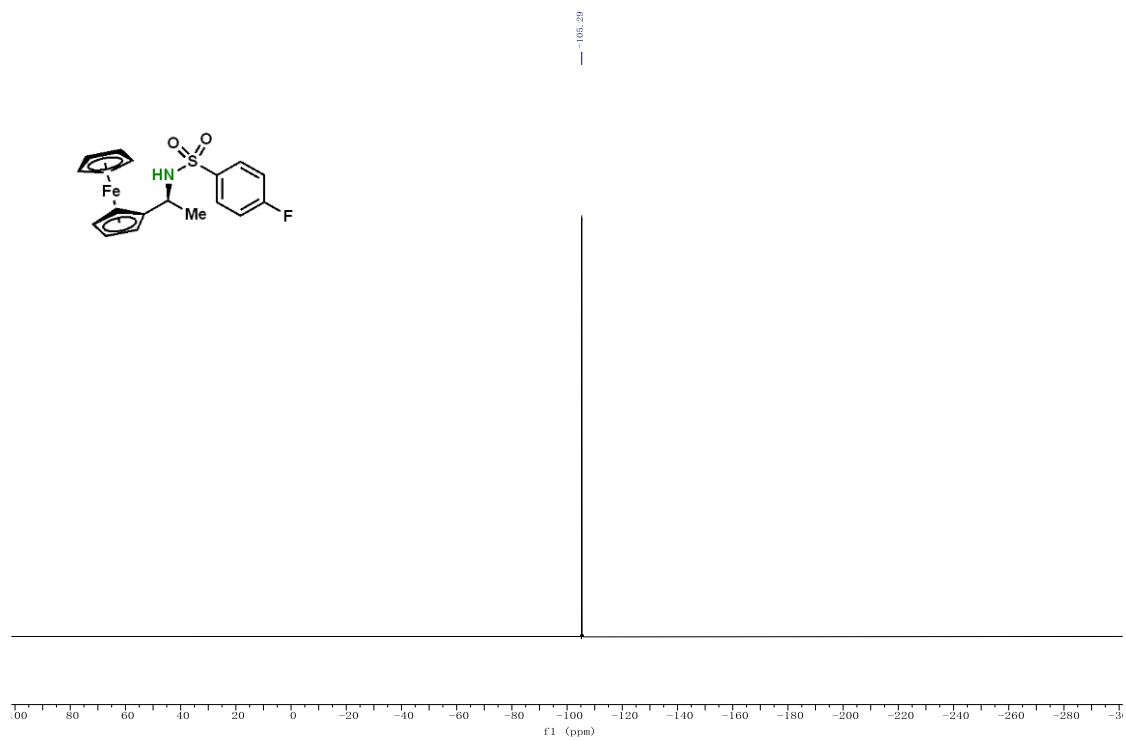

**(S)-4-chloro-N-(1-(ferrocene-2-yl)ethyl)benzenesulfonamide (47)**

<sup>1</sup>H NMR (400 MHz, CDCl<sub>3</sub>)

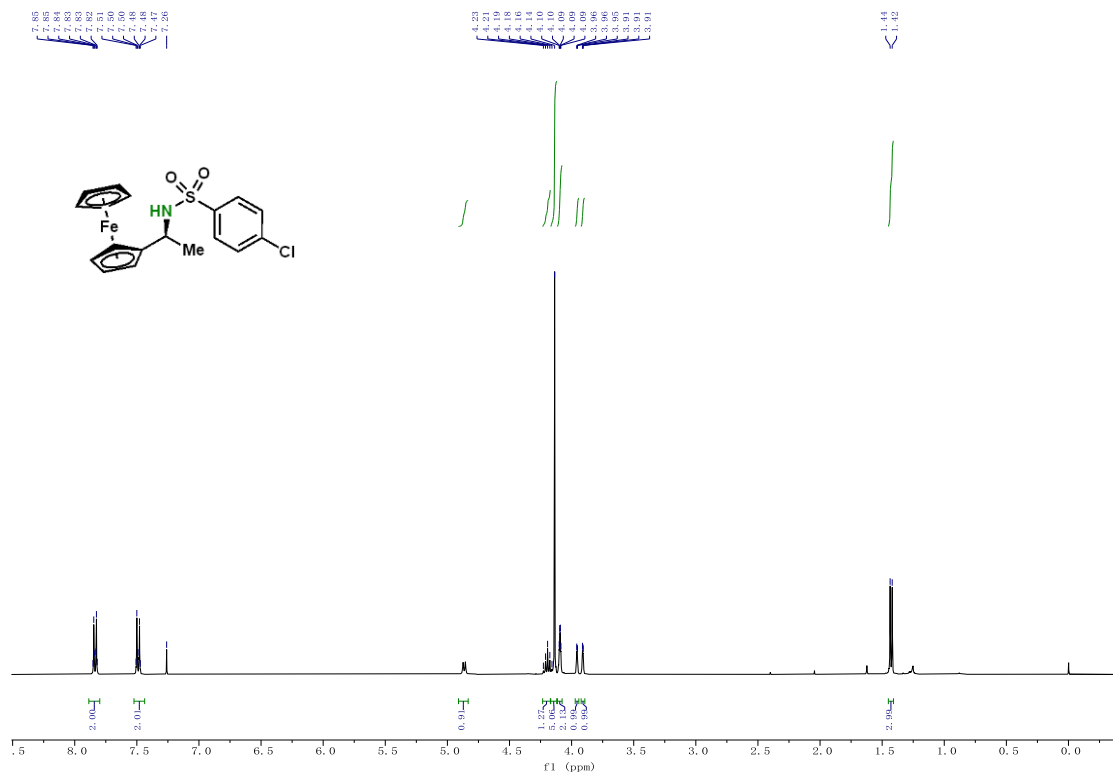

<sup>13</sup>C NMR (101 MHz, CDCl<sub>3</sub>)

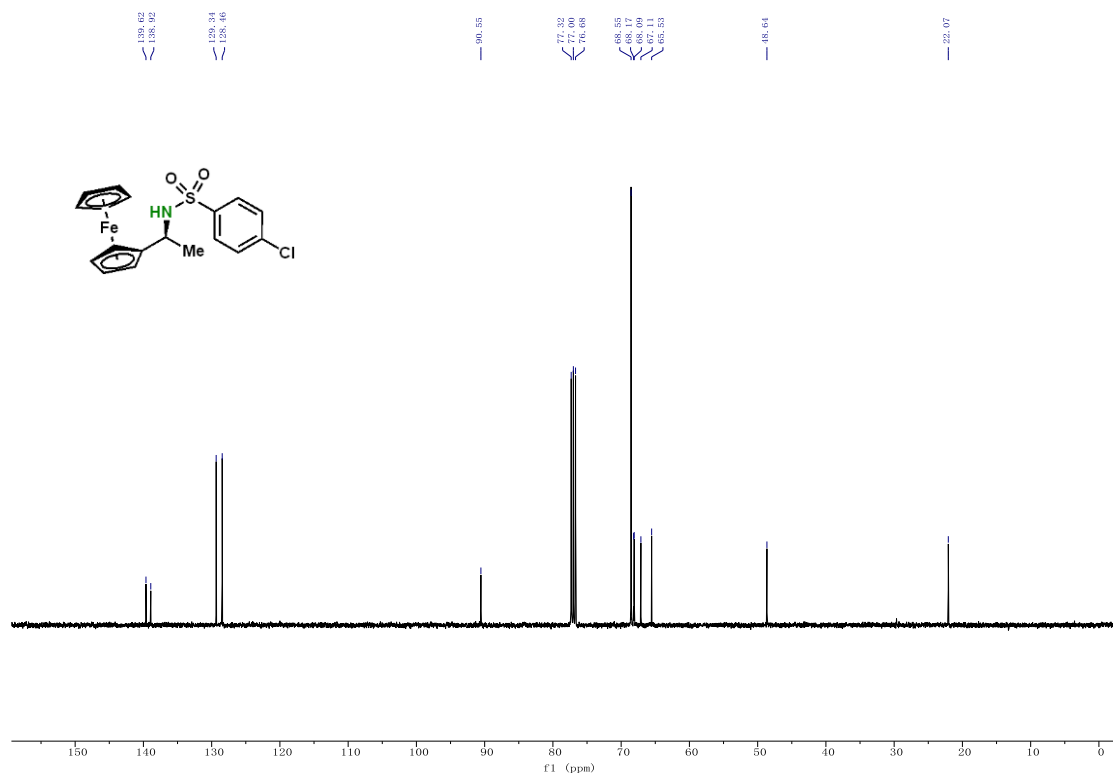

# (S)-4-bromo-N-(1-(ferrocene-2-yl)ethyl)benzenesulfonamide (48)

<sup>1</sup>H NMR (400 MHz, CDCl<sub>3</sub>)

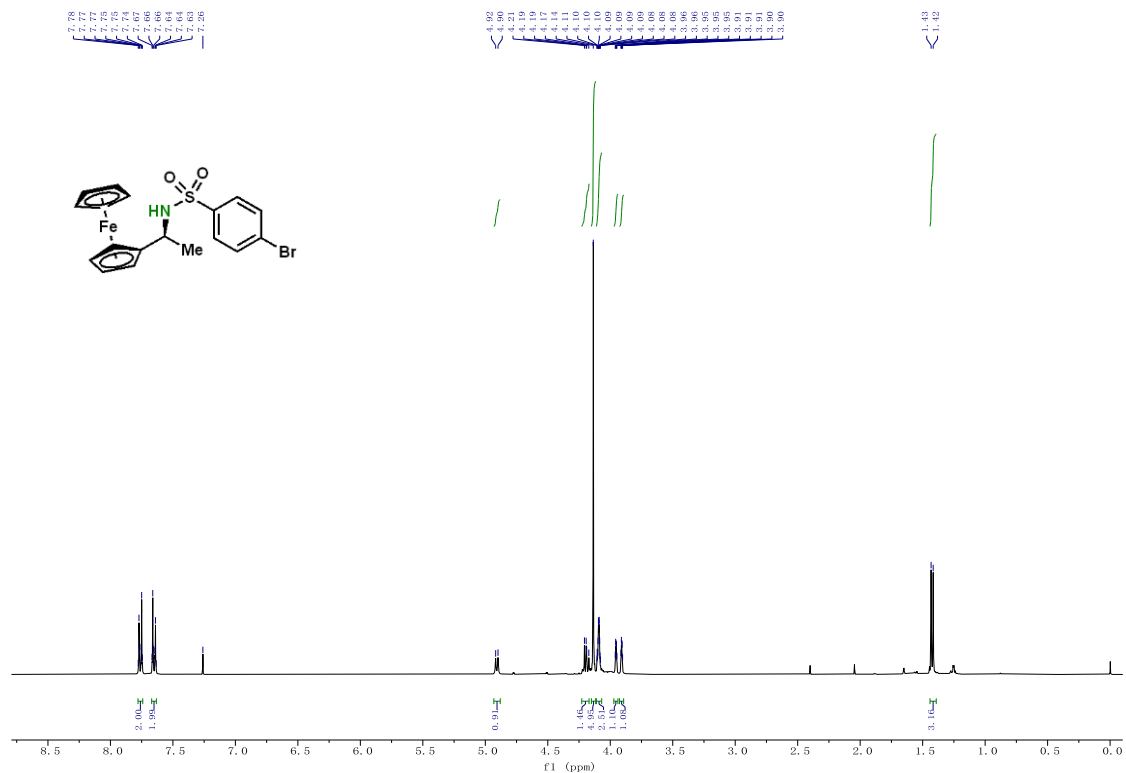

<sup>13</sup>C NMR (101 MHz, CDCl<sub>3</sub>)

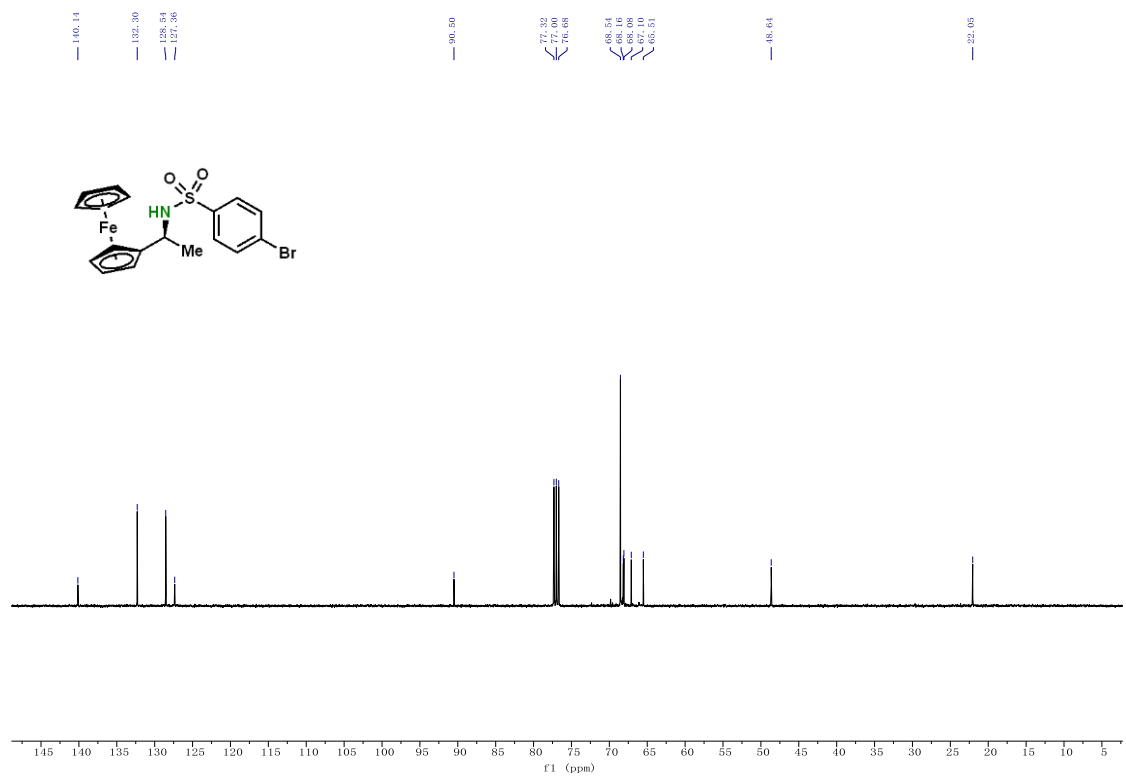

# (S)-4-iodo-N-(1-(ferrocene-2-yl)ethyl)benzenesulfonamide (49)

<sup>1</sup>H NMR (400 MHz, CDCl<sub>3</sub>)

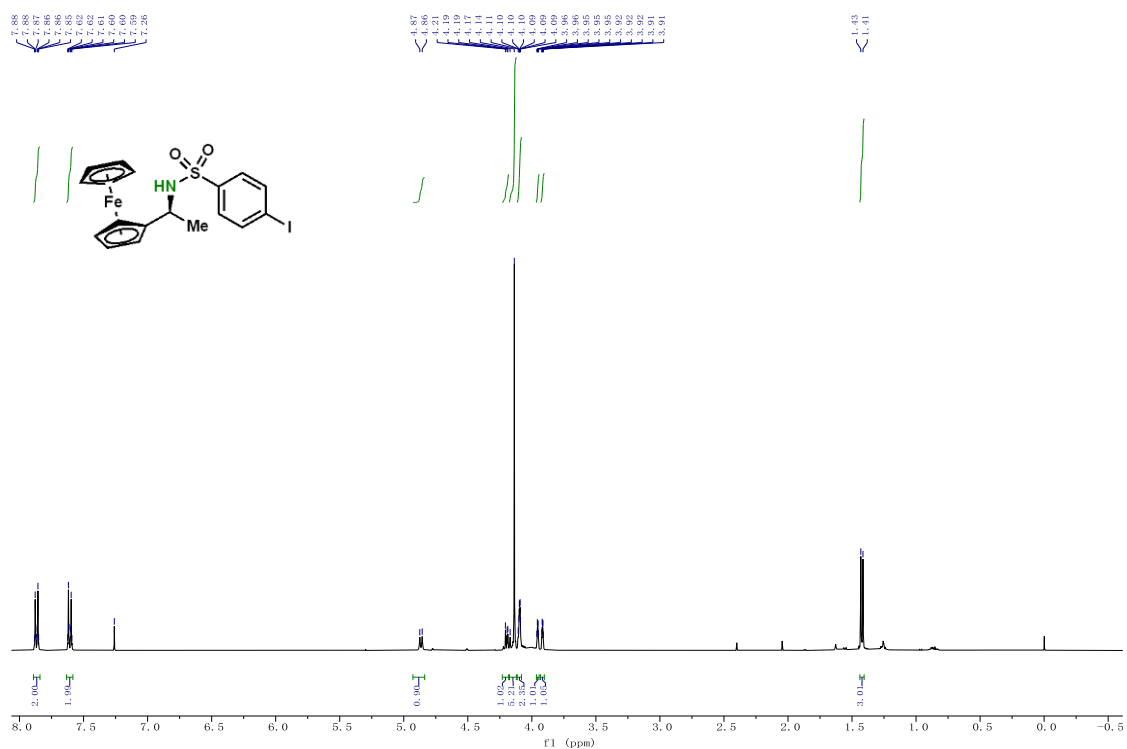

<sup>13</sup>C NMR (101 MHz, CDCl<sub>3</sub>)

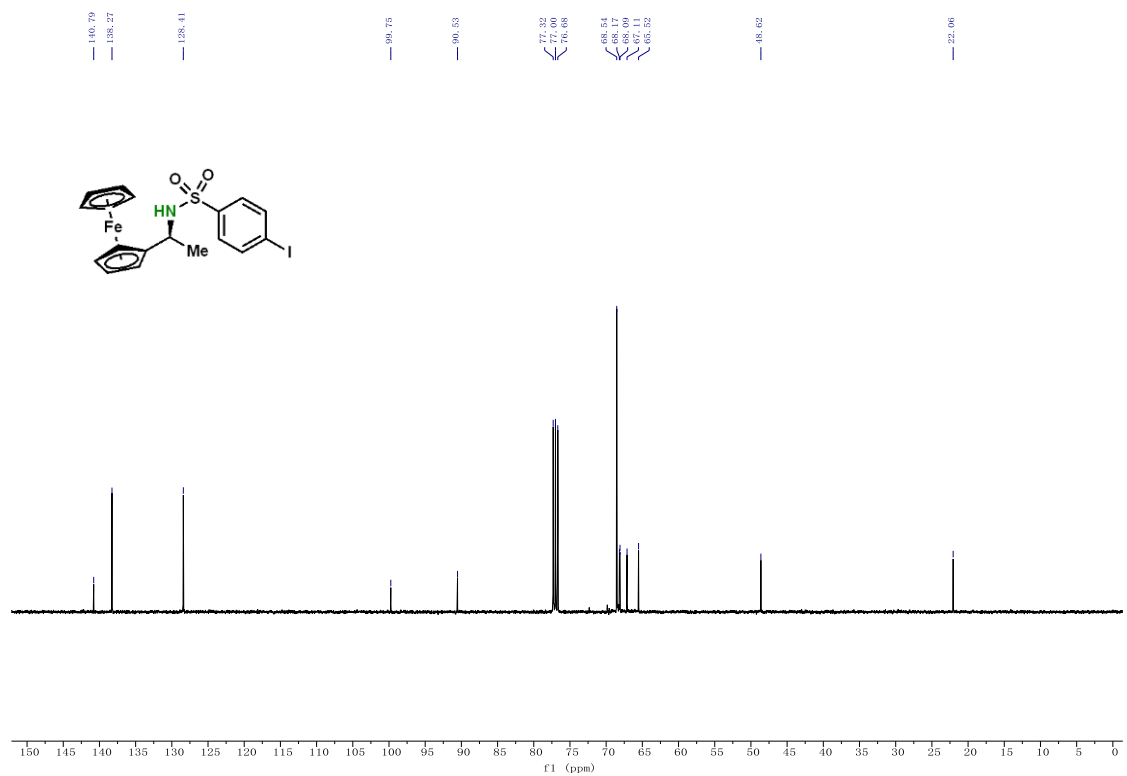



**$^{19}\text{F}$  NMR (376 MHz,  $\text{CDCl}_3$ )**

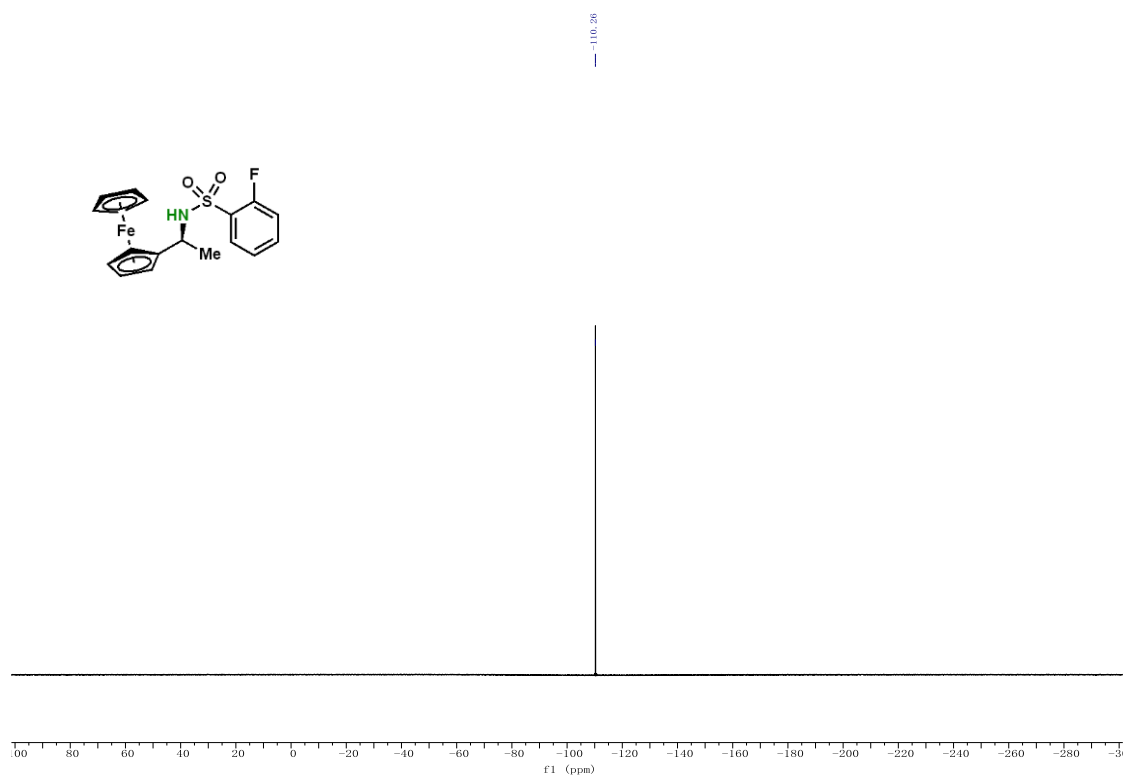

**(S)-3-fluoro-N-(1-(ferrocene-2-yl)ethyl)benzenesulfonamide (51)**

<sup>1</sup>H NMR (400 MHz, CDCl<sub>3</sub>)

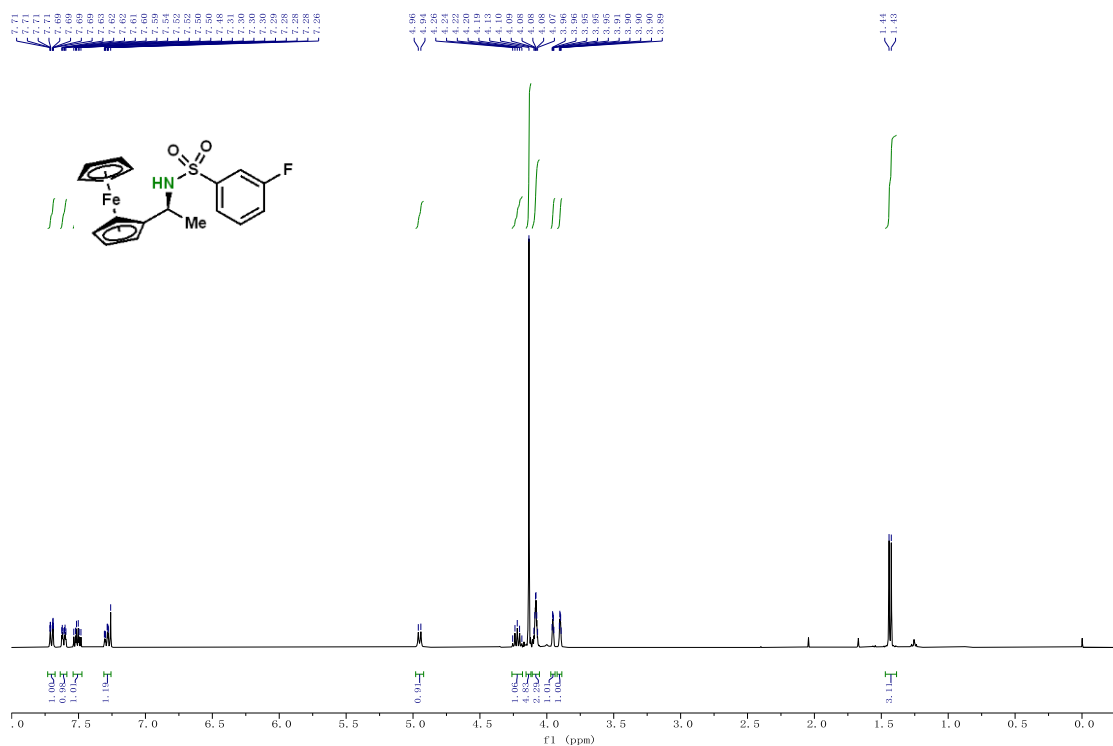

<sup>13</sup>C NMR (101 MHz, CDCl<sub>3</sub>)

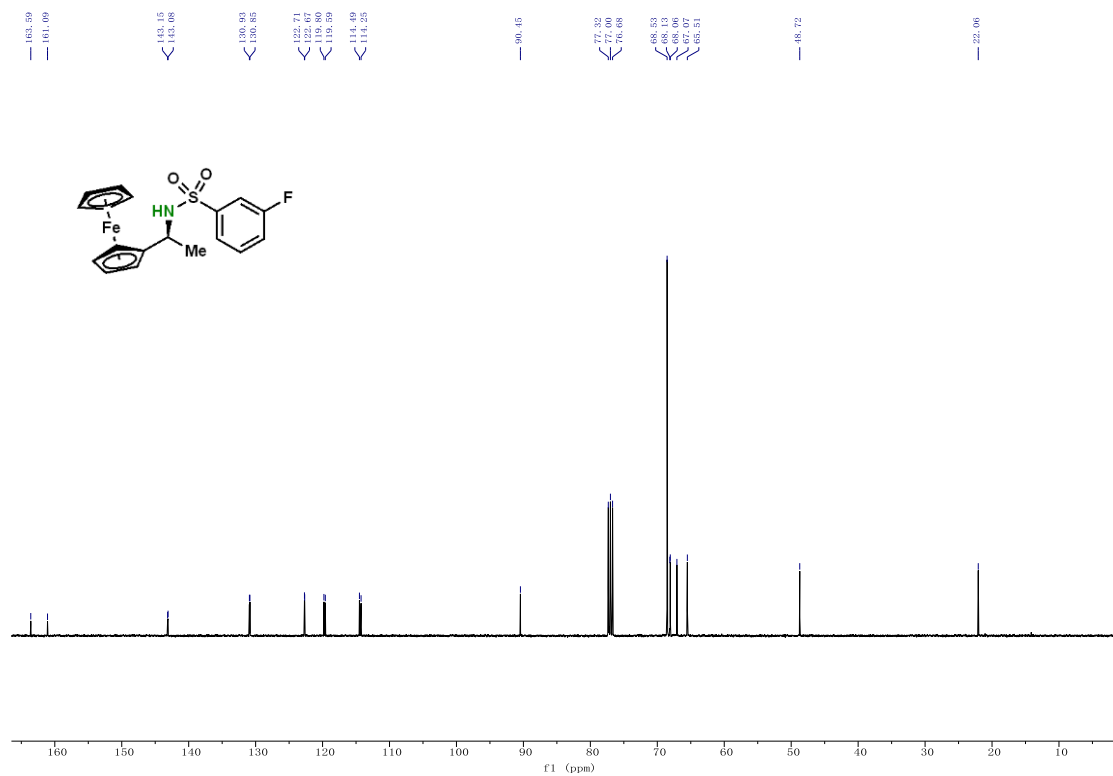

**<sup>19</sup>F NMR (376 MHz, CDCl<sub>3</sub>)**

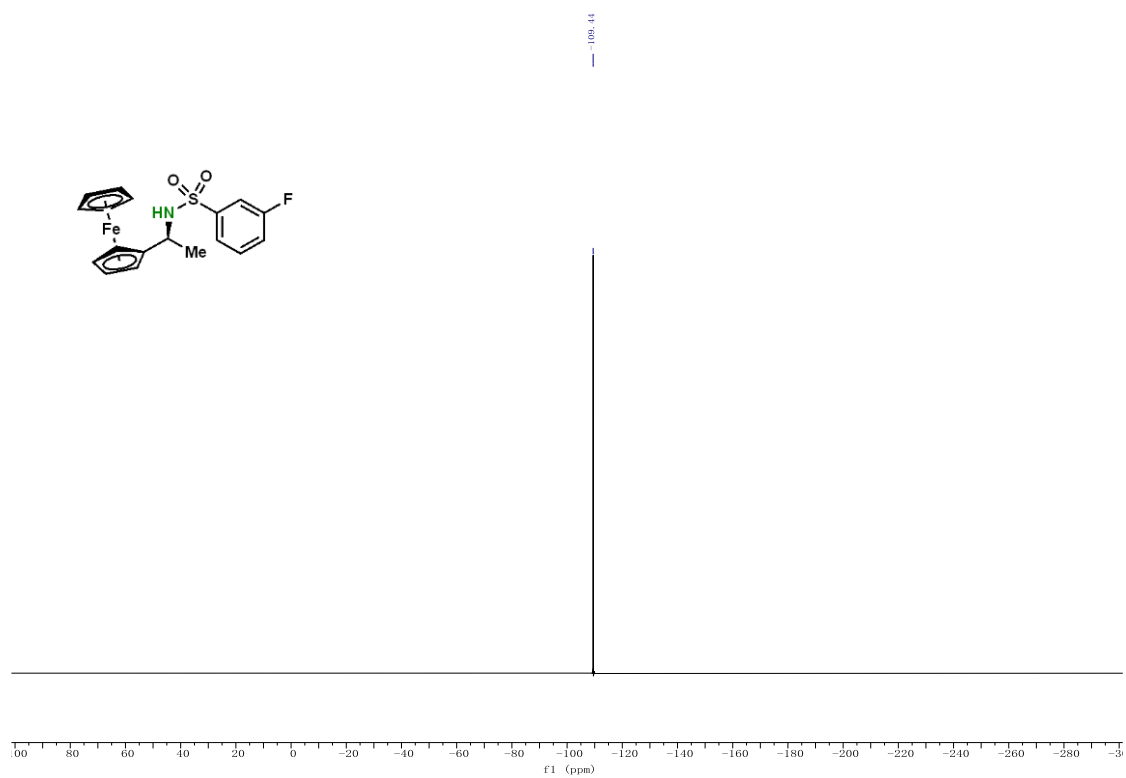

**(S)-N-(1-(ferrocene-2-yl)ethyl)-4-(5-(p-tolyl)-3-(trifluoromethyl)-1H-pyrazol-1-yl)benzenesulfonamide (52)**

<sup>1</sup>H NMR (400 MHz, CDCl<sub>3</sub>)

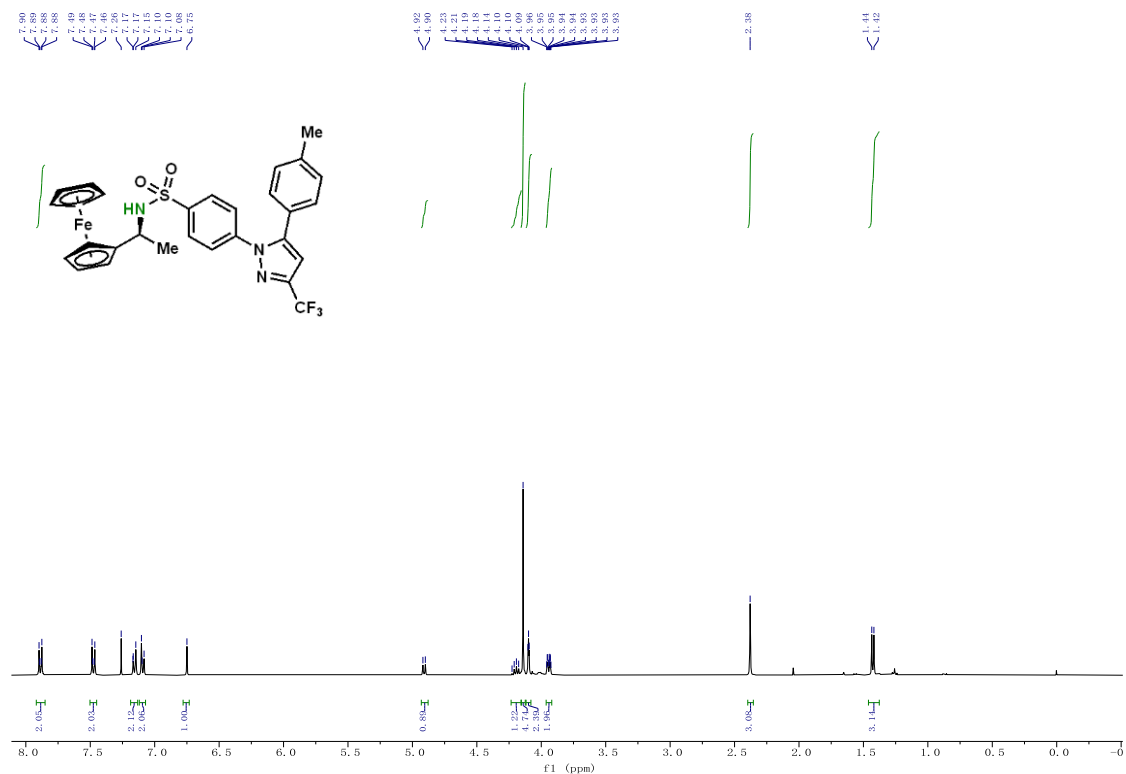

<sup>13</sup>C NMR (101 MHz, CDCl<sub>3</sub>)

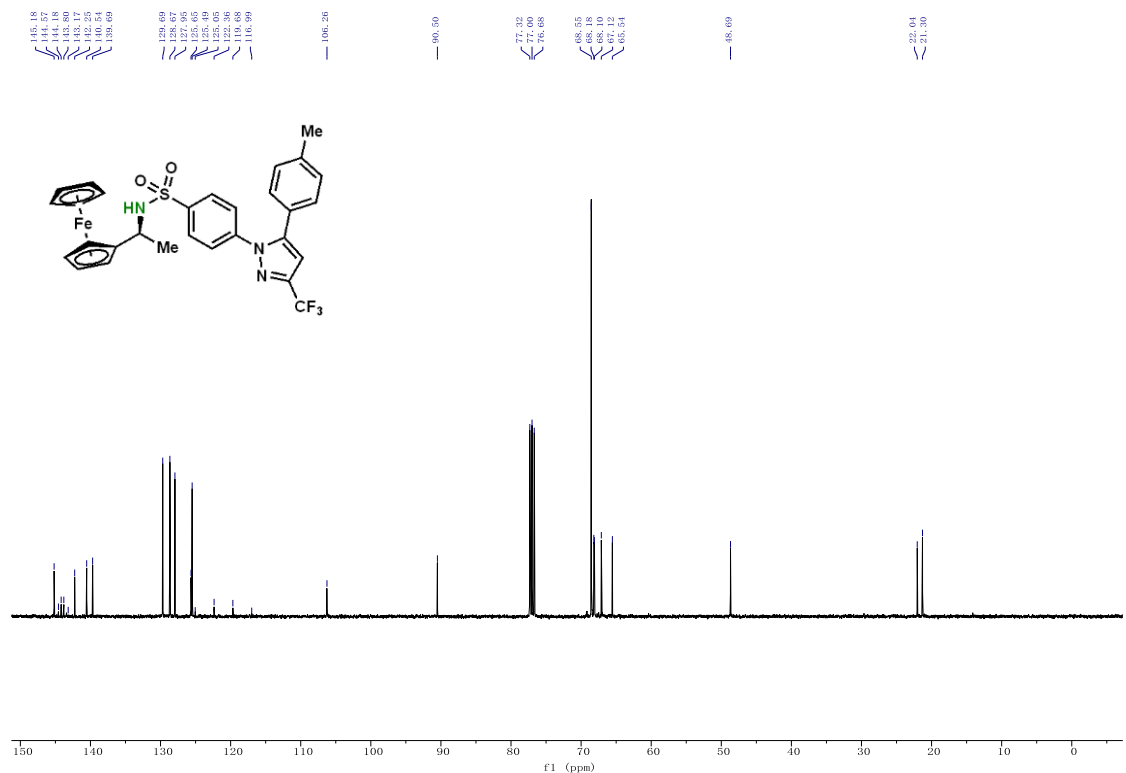

**<sup>19</sup>F NMR (376 MHz, CDCl<sub>3</sub>)**

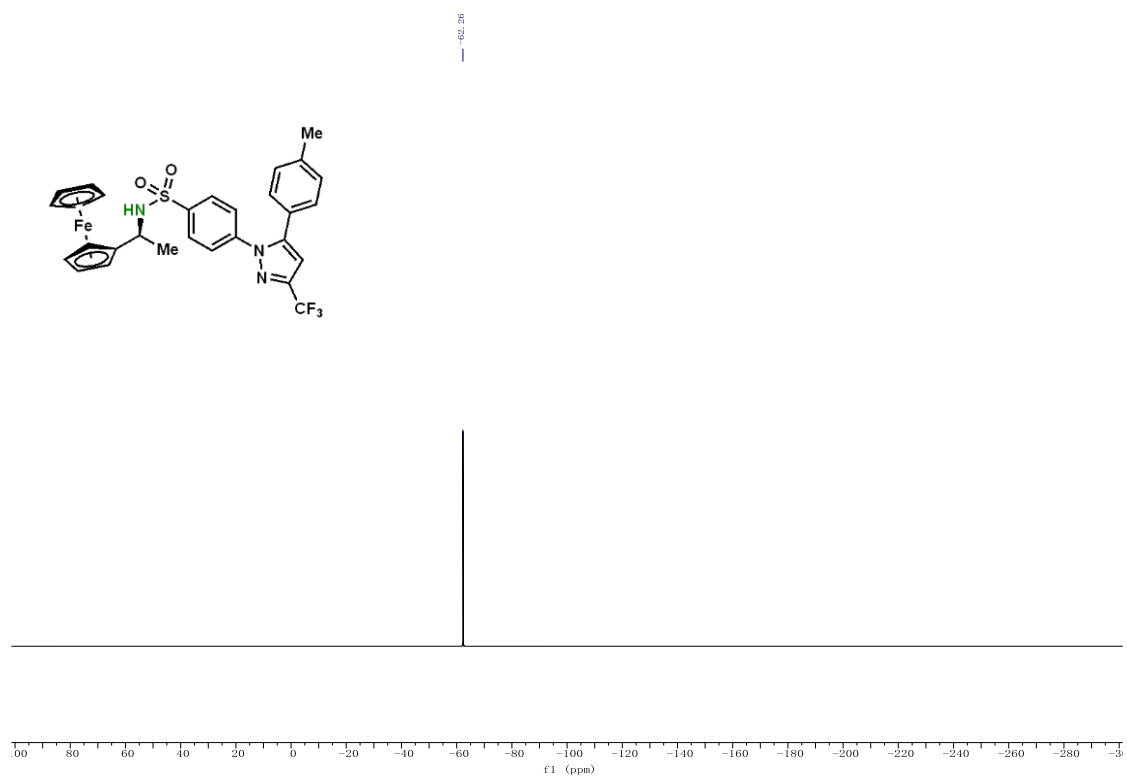

**(S)-4-methyl-N'-(1-(ferrocene-2-yl)ethyl)benzenesulfonohydrazide (53)**

<sup>1</sup>H NMR (400 MHz, CDCl<sub>3</sub>)

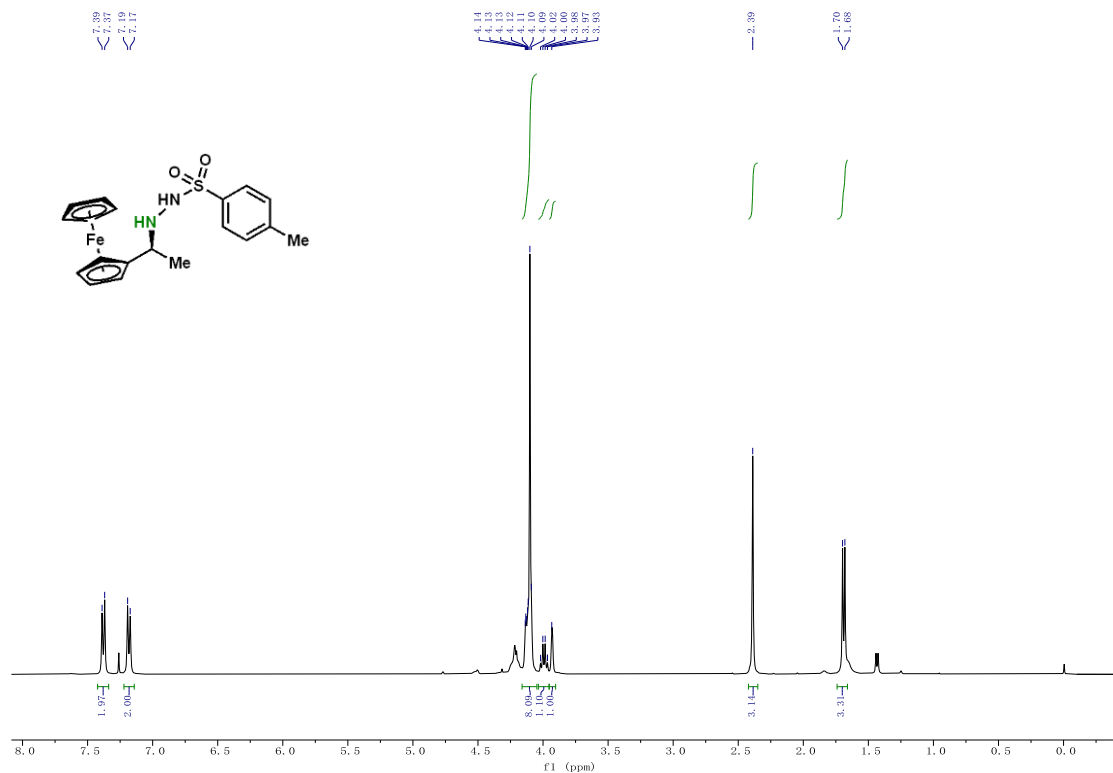

<sup>13</sup>C NMR (101 MHz, CDCl<sub>3</sub>)

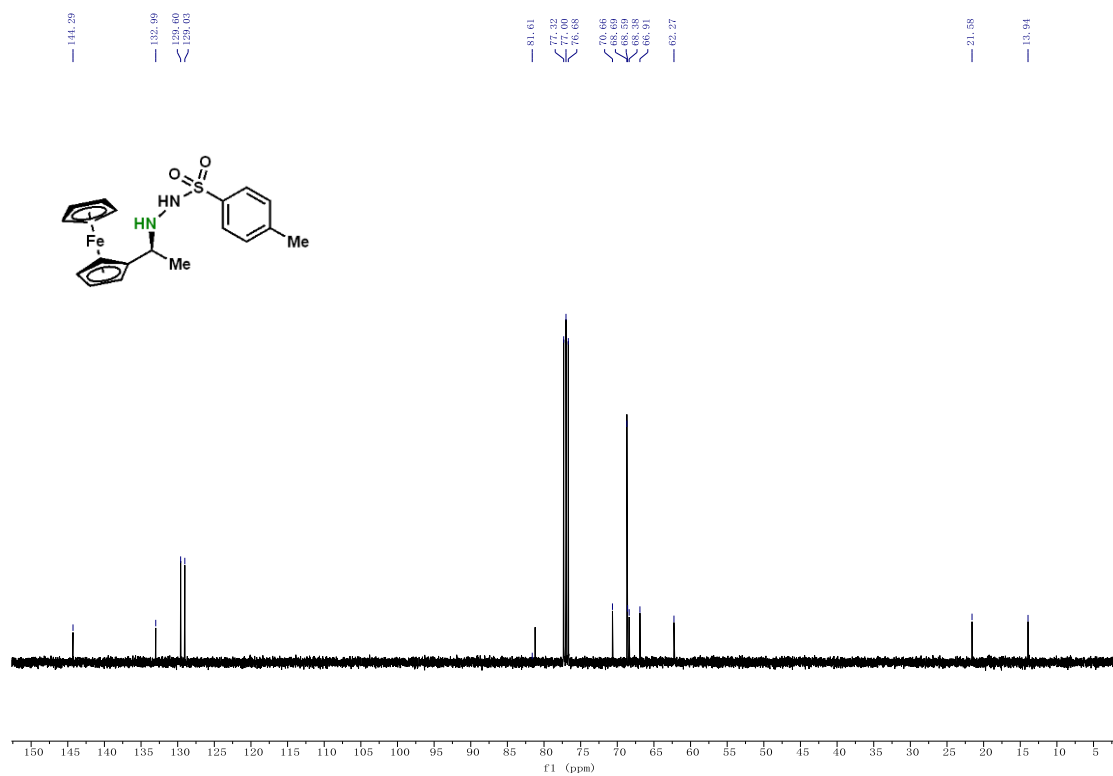

# (S)-4-methoxy-N'-(1-(ferrocene-2-yl)ethyl)benzenesulfonohydrazide (54)

<sup>1</sup>H NMR (400 MHz, CDCl<sub>3</sub>)

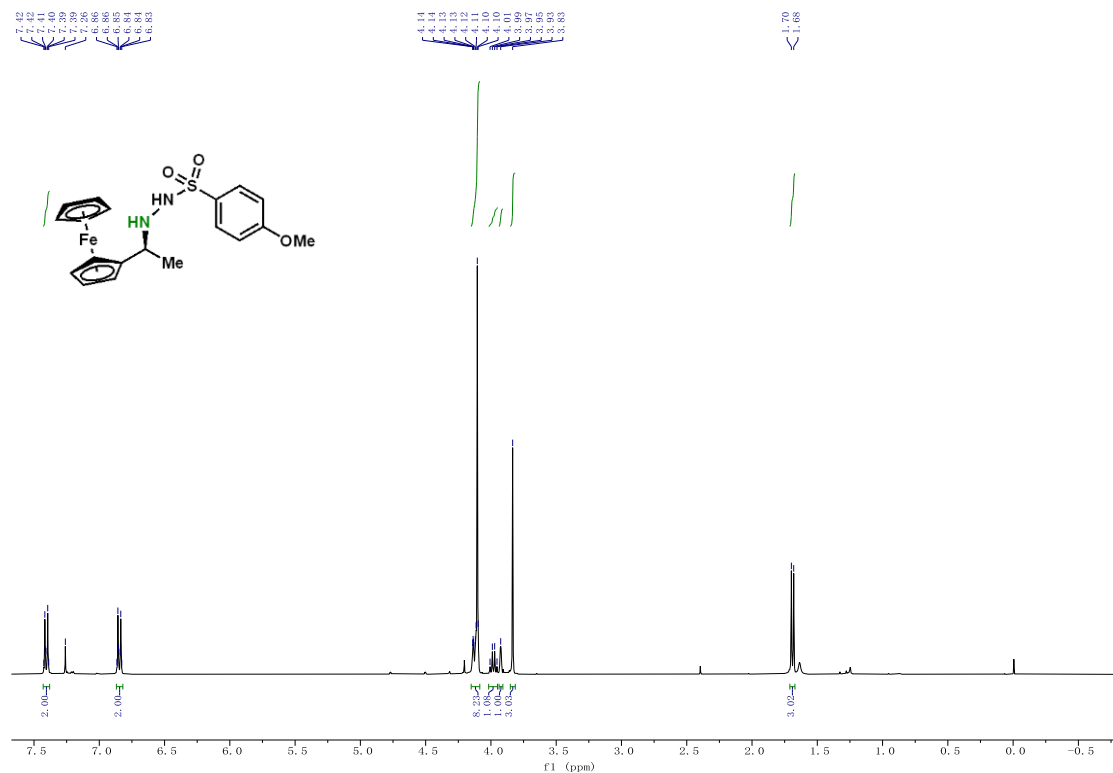

<sup>13</sup>C NMR (101 MHz, CDCl<sub>3</sub>)

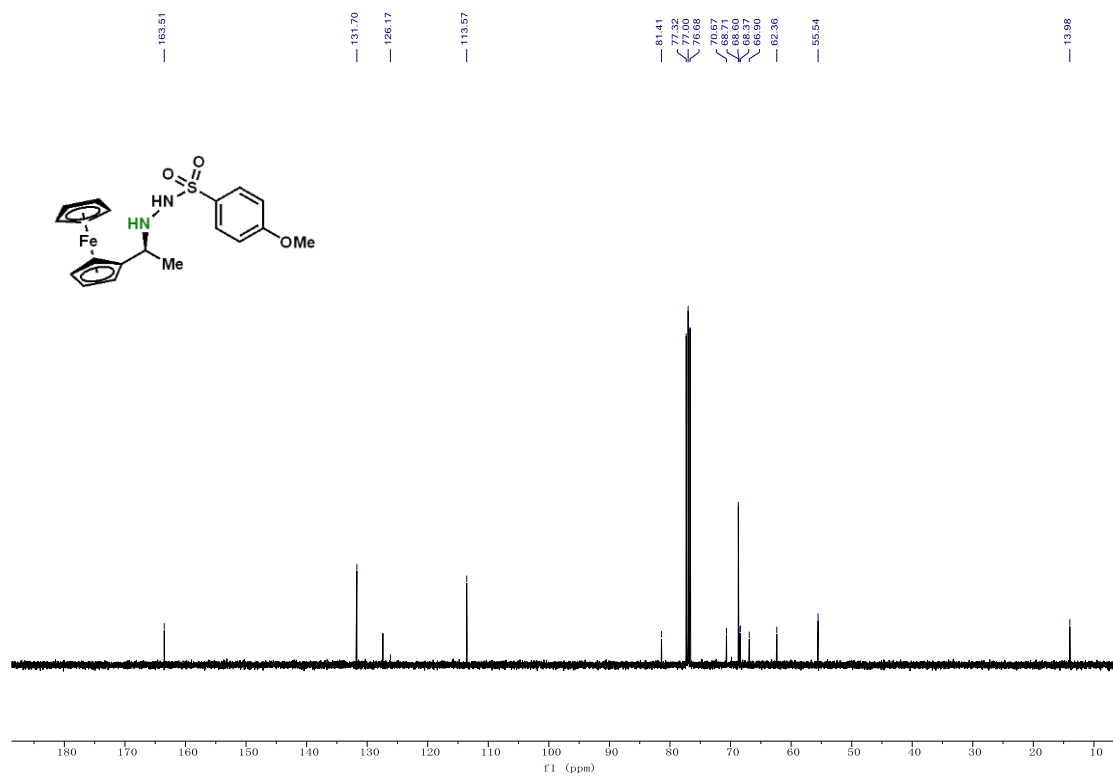

**(S)-5-bromo-6-methyl-1-(1-(ferrocene-2-yl)ethyl)-1H-indazole (55)**

<sup>1</sup>H NMR (400 MHz, CDCl<sub>3</sub>)

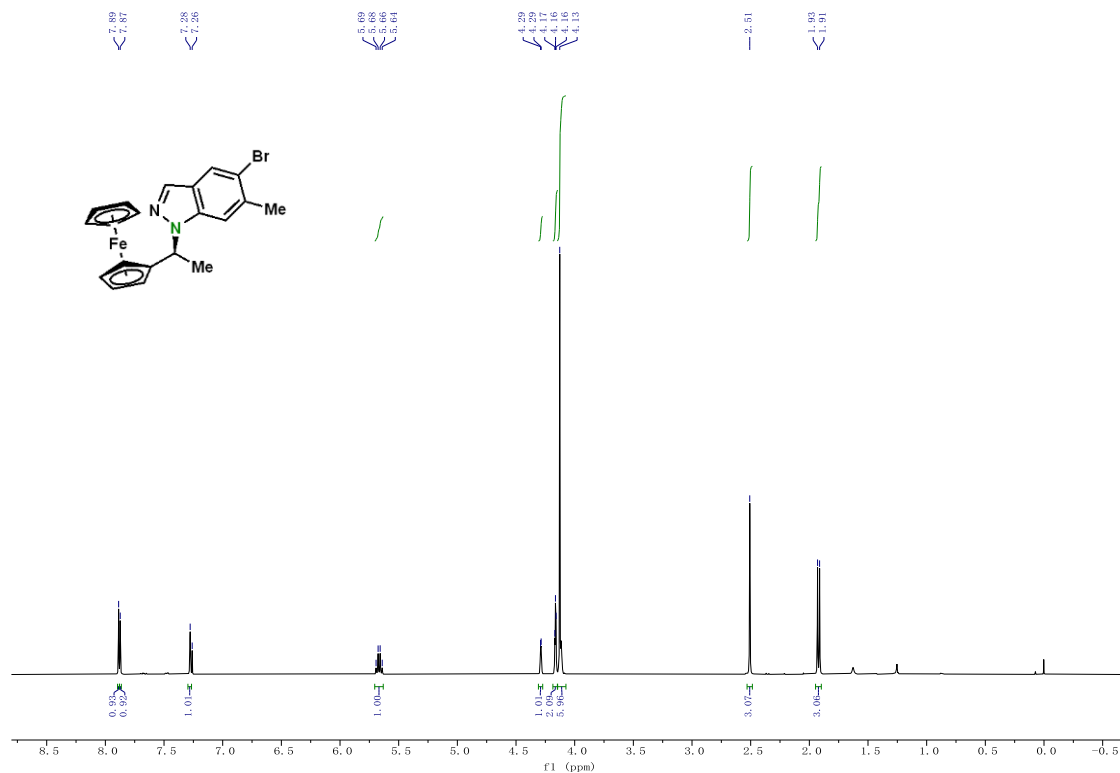

<sup>13</sup>C NMR (101 MHz, CDCl<sub>3</sub>)

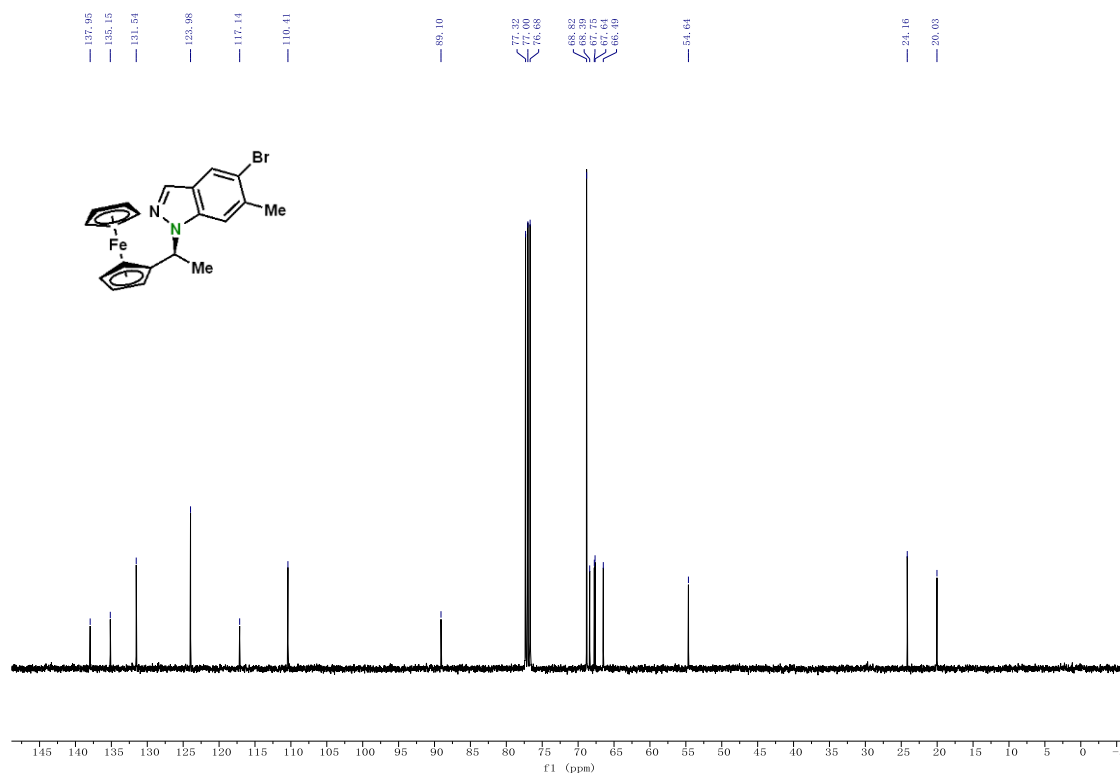

**(S)-4-bromo-5-methyl-1-(1-(ferrocene-2-yl)ethyl)-1H-indazole (56)**

<sup>1</sup>H NMR (400 MHz, CDCl<sub>3</sub>)

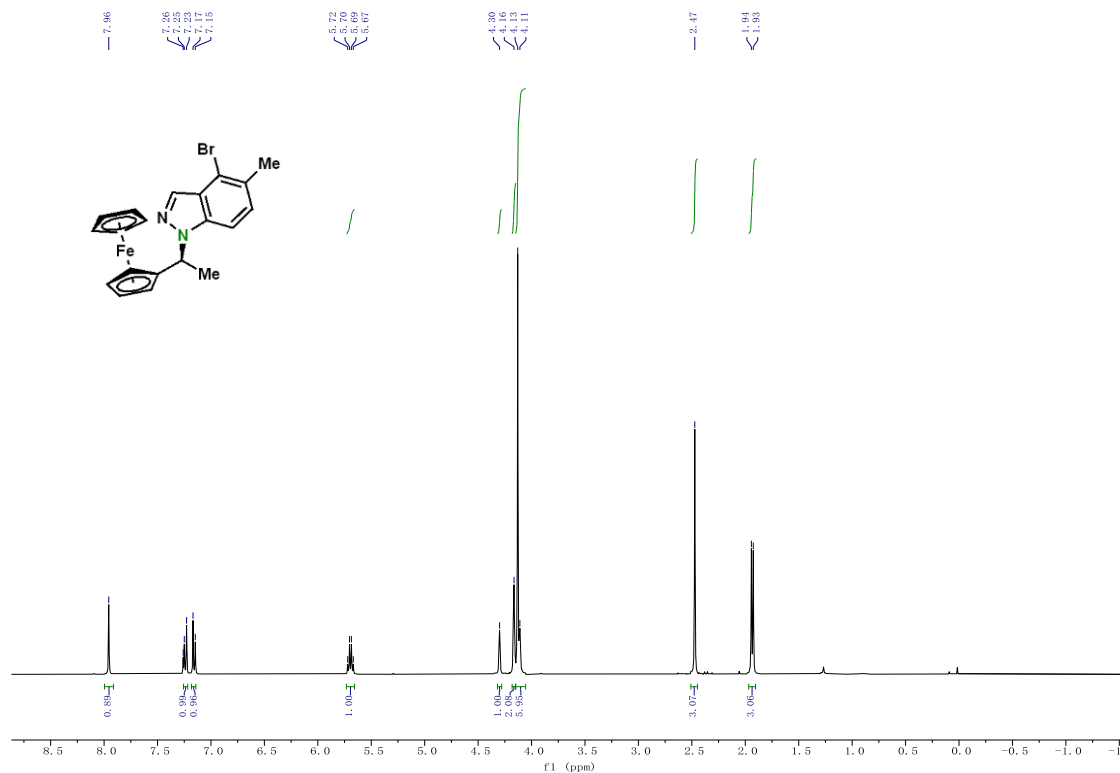

<sup>13</sup>C NMR (101 MHz, CDCl<sub>3</sub>)

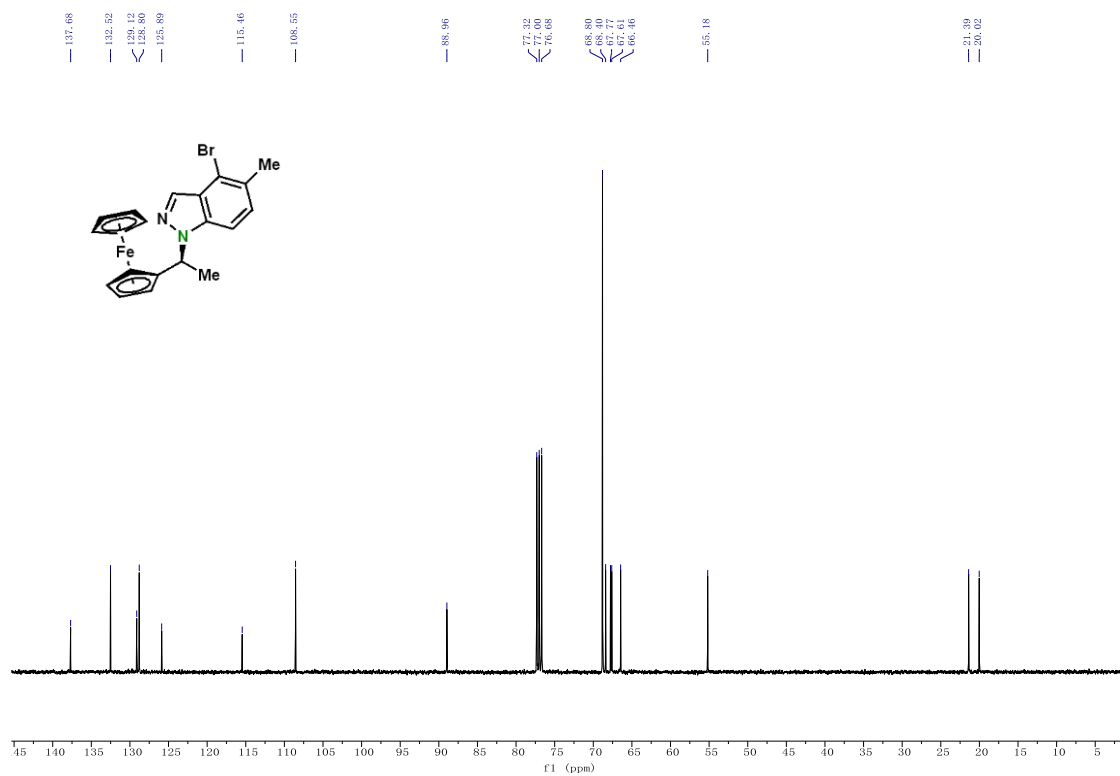

**methyl (S)-1-(1-(ferrocene-2-yl)ethyl)-1H-indazole-3-carboxylate (57)**

**<sup>1</sup>H NMR (400 MHz, CDCl<sub>3</sub>)**

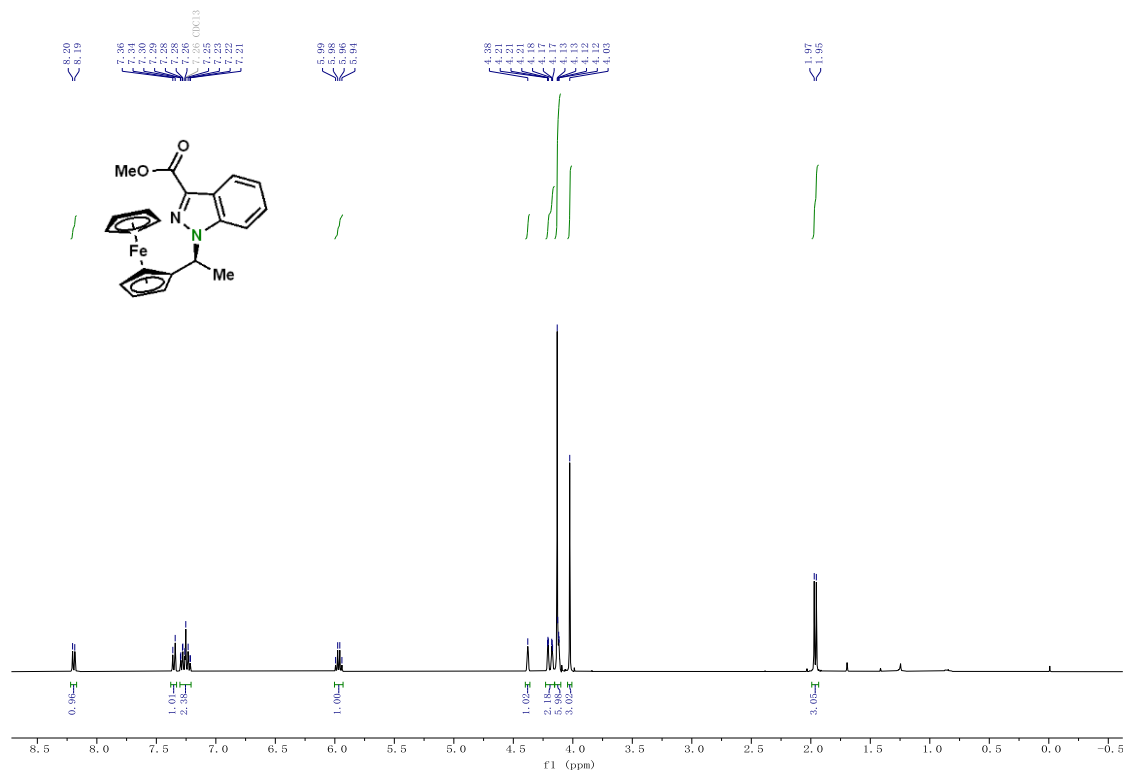

**<sup>13</sup>C NMR (101 MHz, CDCl<sub>3</sub>)**

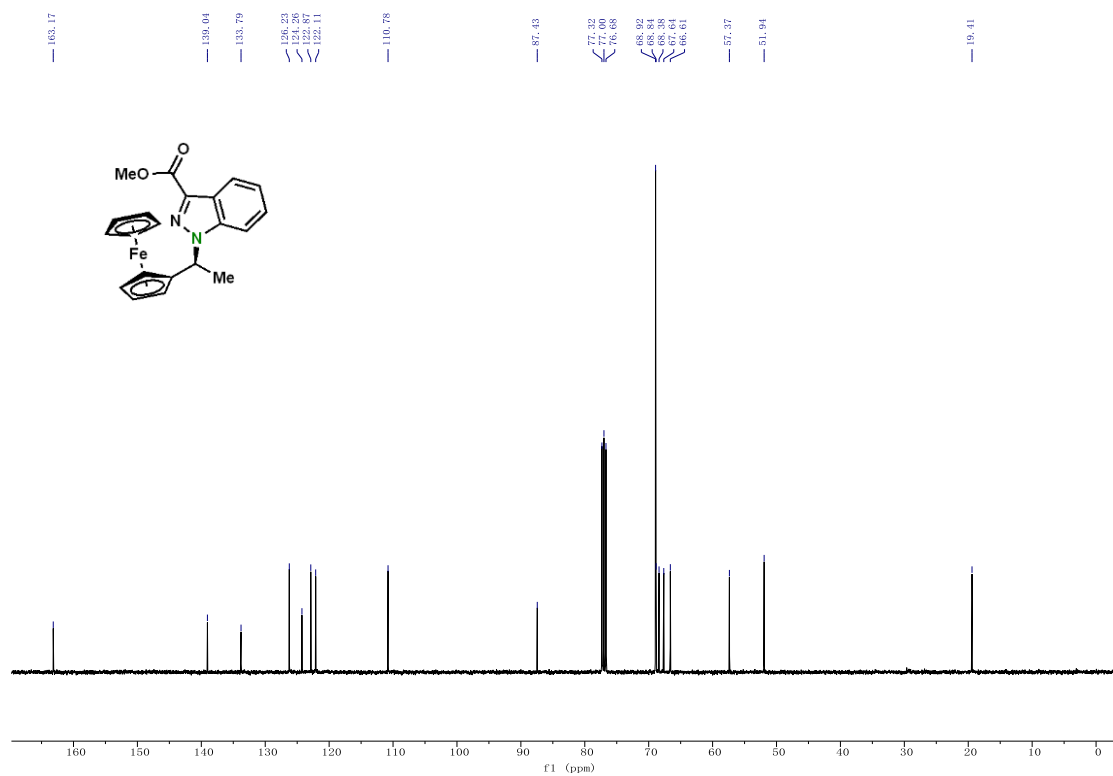

**ethyl (S)-1-(1-(ferrocene-2-yl)ethyl)-1H-pyrazole-4-carboxylate (58)**

<sup>1</sup>H NMR (400 MHz, CDCl<sub>3</sub>)

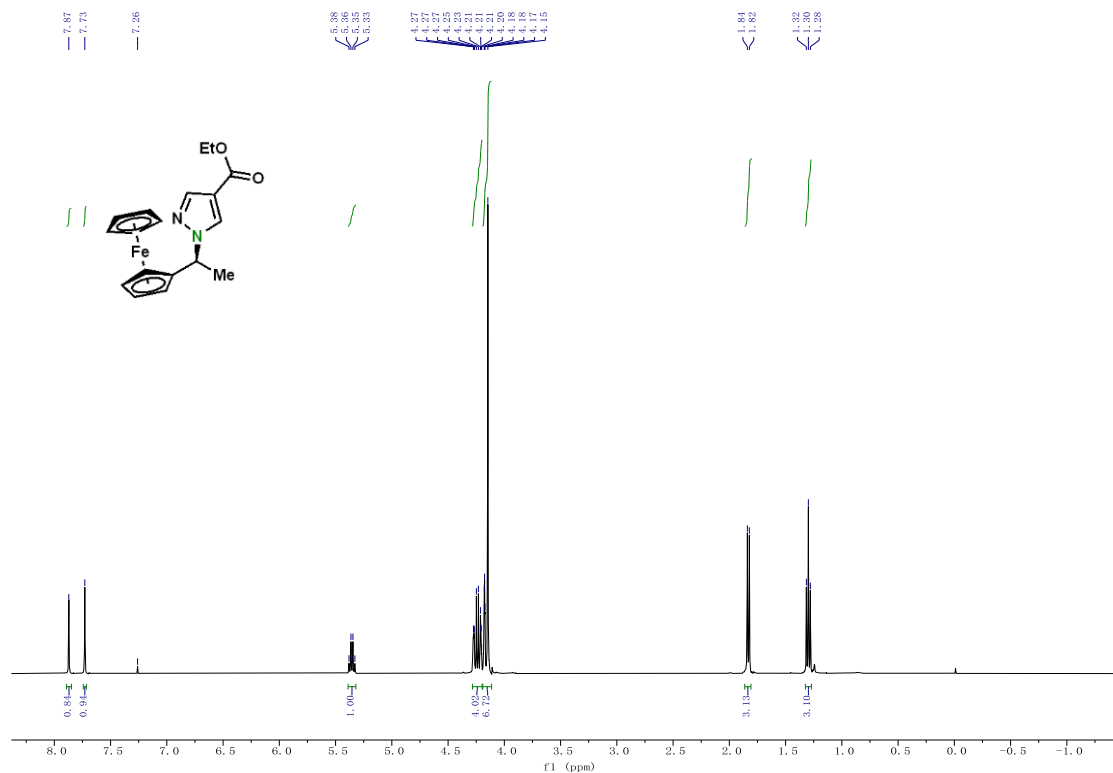

<sup>13</sup>C NMR (101 MHz, CDCl<sub>3</sub>)

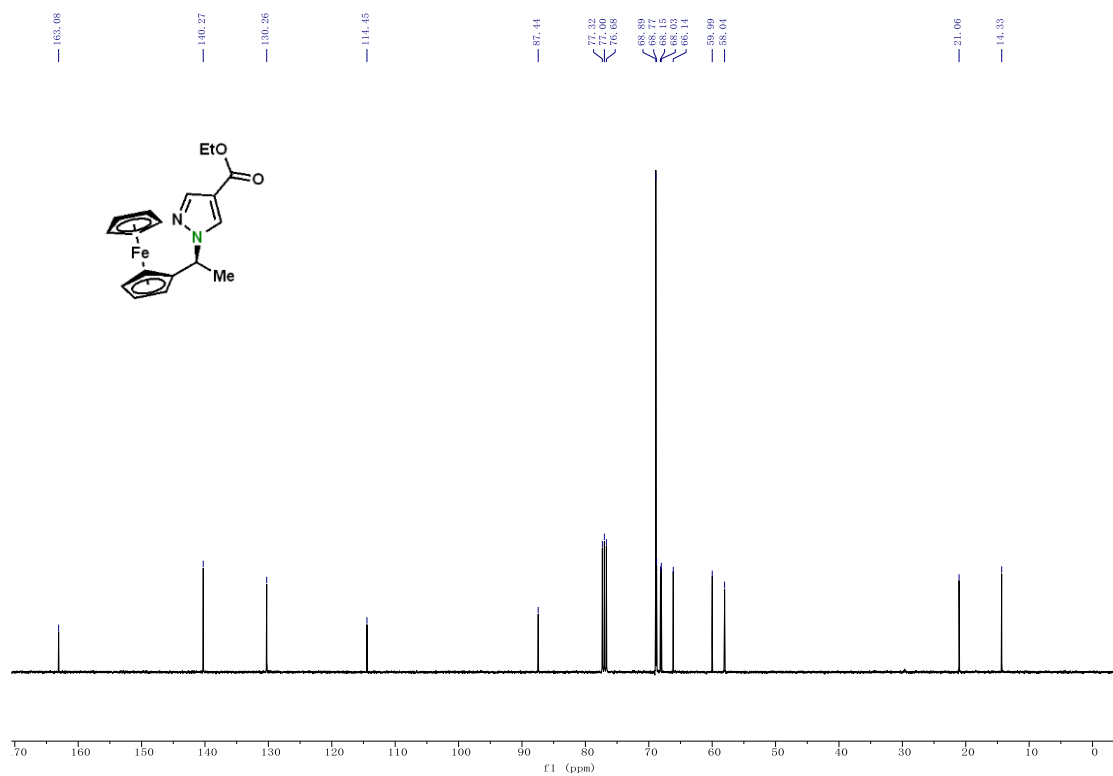

# diethyl (S)-1-(1-(ferrocene-2-yl)ethyl)-1H-pyrazole-3,5-dicarboxylate (59)

$^1\text{H}$  NMR (400 MHz,  $\text{CDCl}_3$ )

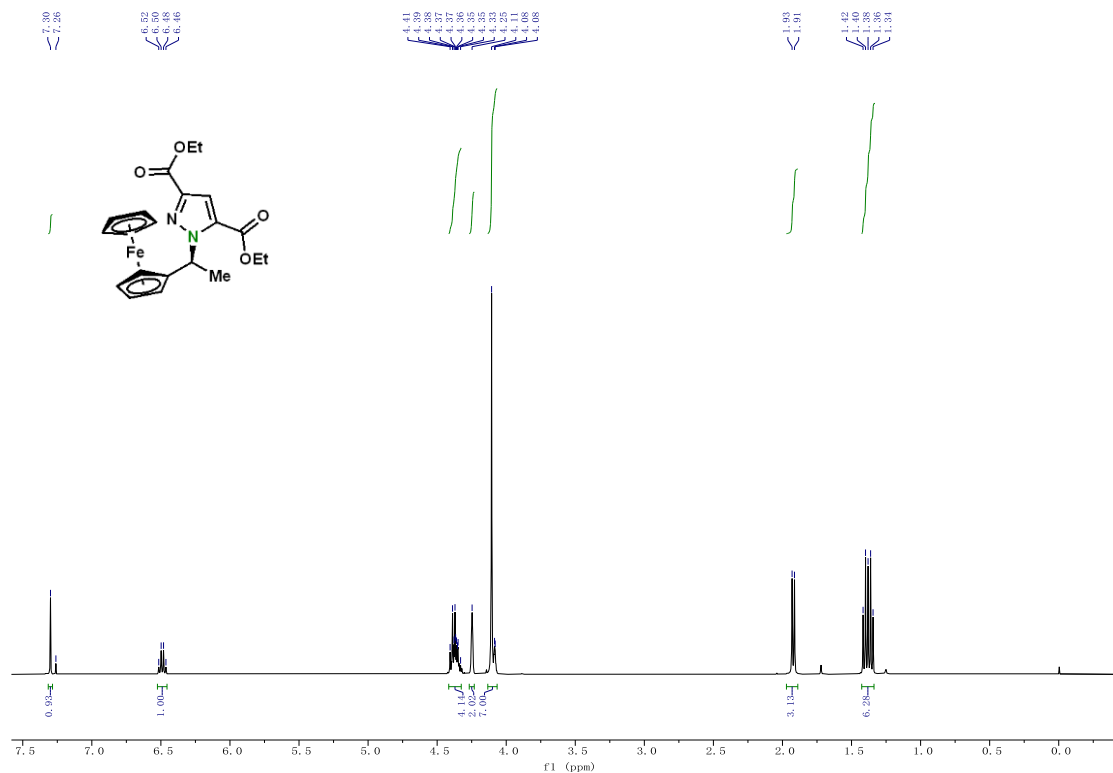

$^{13}\text{C}$  NMR (101 MHz,  $\text{CDCl}_3$ )

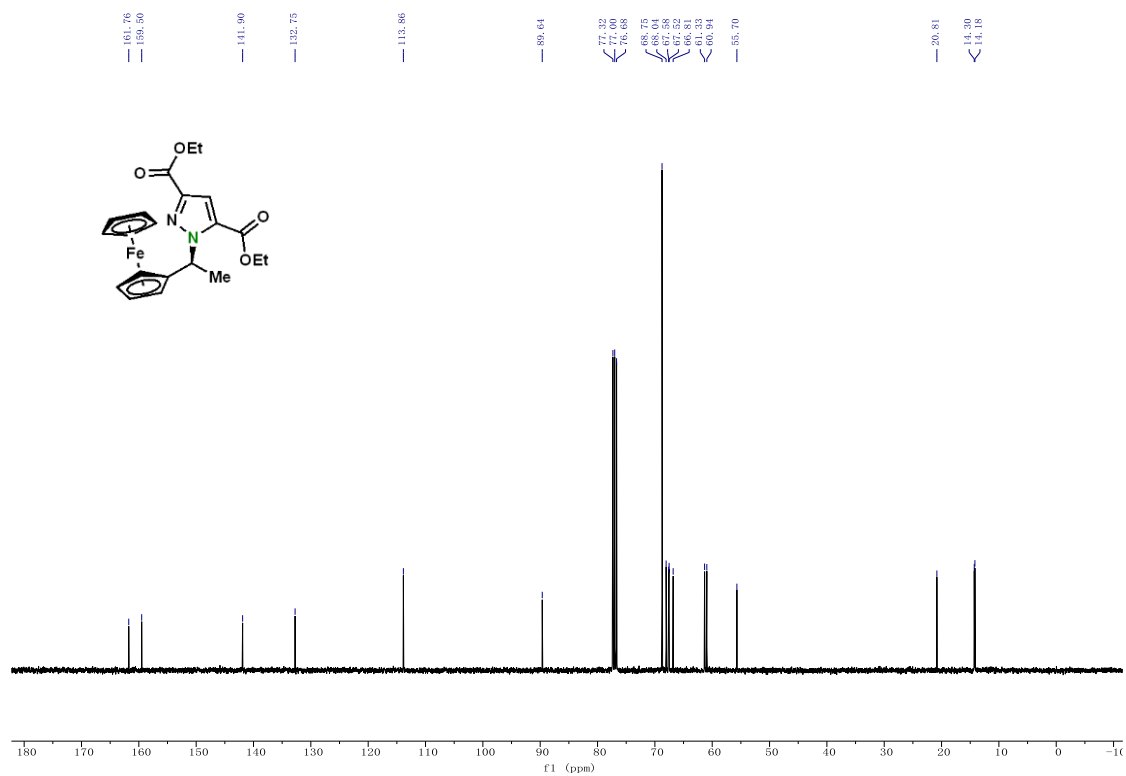

**methyl (S)-1-(1-(ferrocene-2-yl)ethyl)-1H-1,2,3-triazole-5-carboxylate (60)**

<sup>1</sup>H NMR (400 MHz, CDCl<sub>3</sub>)

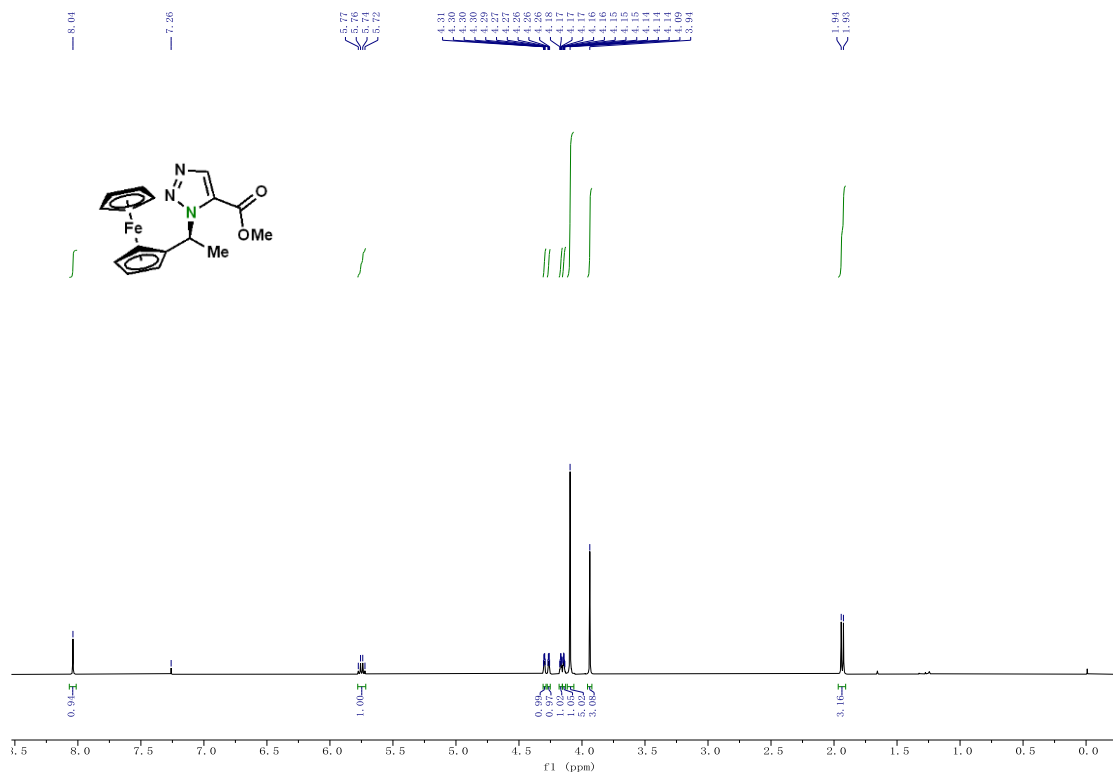

<sup>13</sup>C NMR (101 MHz, CDCl<sub>3</sub>)

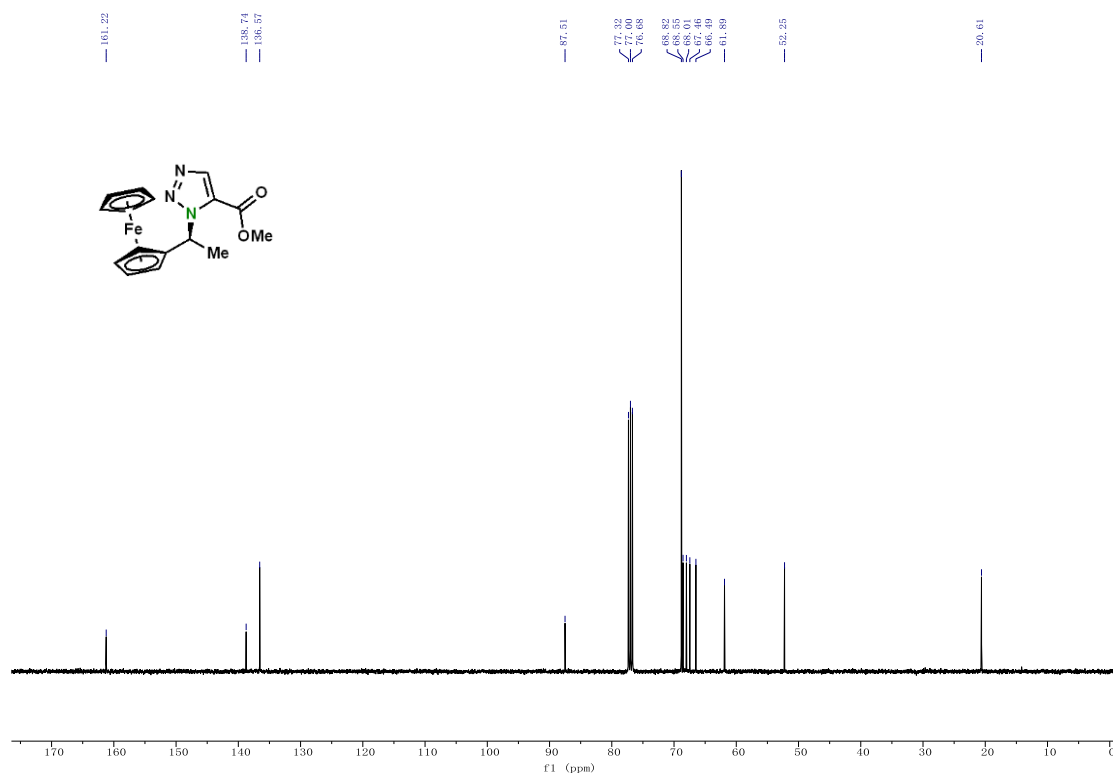

**methyl (S)-2-(1-(ferrocene-2-yl)ethyl)-2H-1,2,3-triazole-4-carboxylate (61)**

<sup>1</sup>H NMR (400 MHz, CDCl<sub>3</sub>)

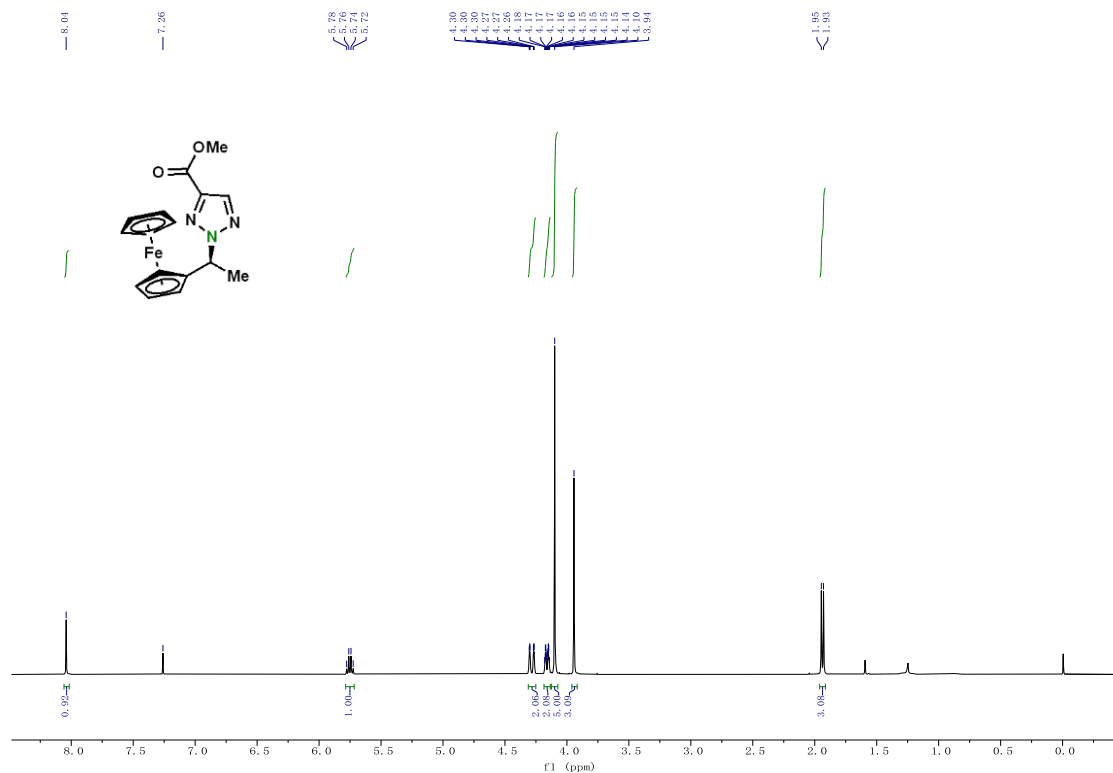

<sup>13</sup>C NMR (101 MHz, CDCl<sub>3</sub>)

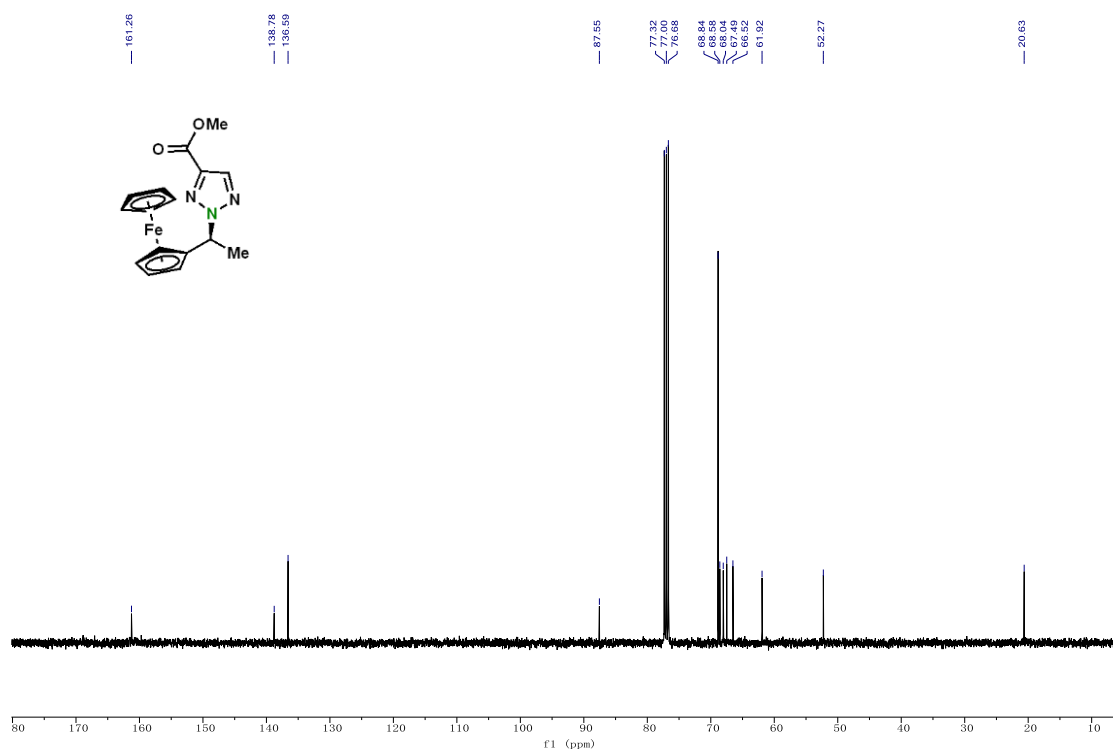



**(S)-6-chloro-9-(1-(ferrocene-2-yl)ethyl)-9H-purine (63)**

<sup>1</sup>H NMR (400 MHz, CDCl<sub>3</sub>)

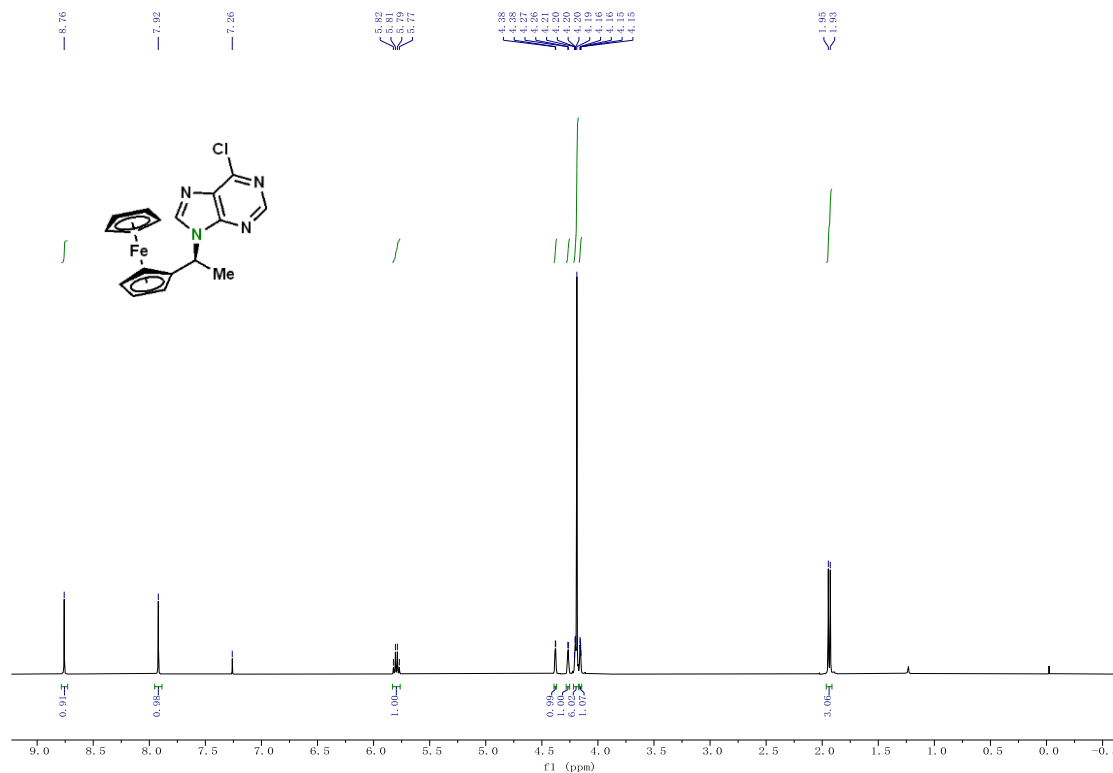

<sup>13</sup>C NMR (101 MHz, CDCl<sub>3</sub>)

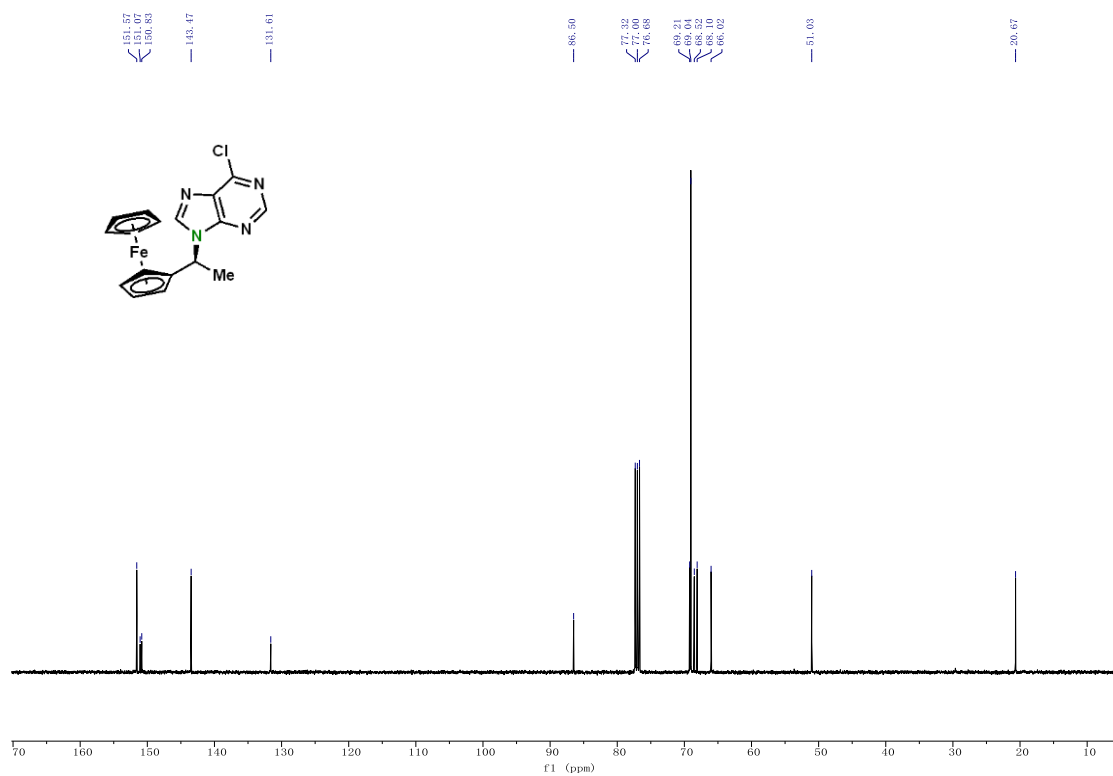

# (S)-3-methyl-1-(1-(ferrocene-2-yl)ethyl)-1H-indole (64)

<sup>1</sup>H NMR (400 MHz, CDCl<sub>3</sub>)

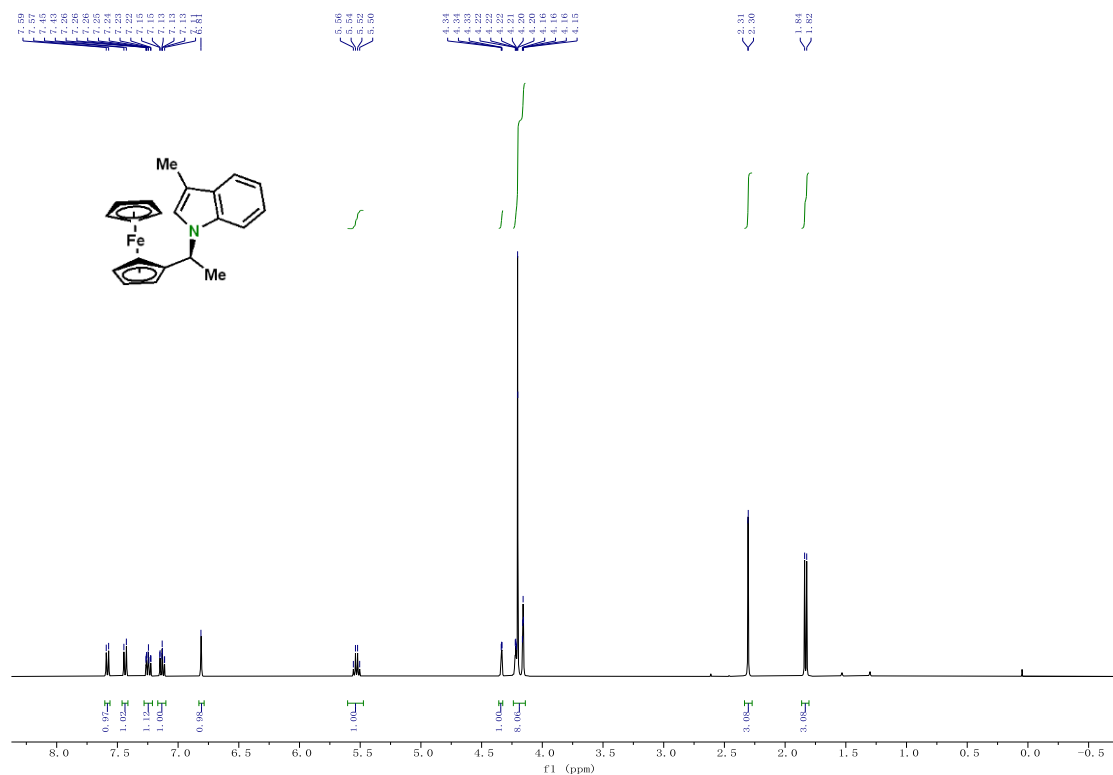

<sup>13</sup>C NMR (101 MHz, CDCl<sub>3</sub>)

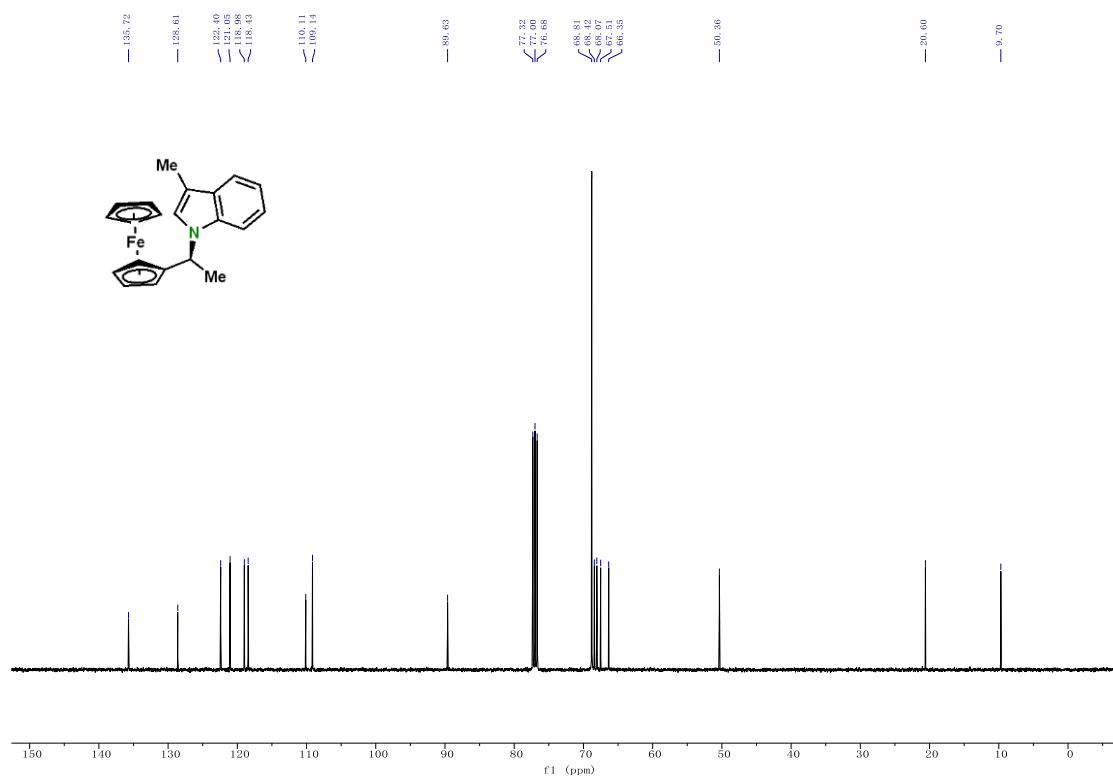

# (S)-5-fluoro-3-methyl-1-(1-(ferrocene-2-yl)ethyl)-1H-indole (65)

<sup>1</sup>H NMR (400 MHz, CDCl<sub>3</sub>)

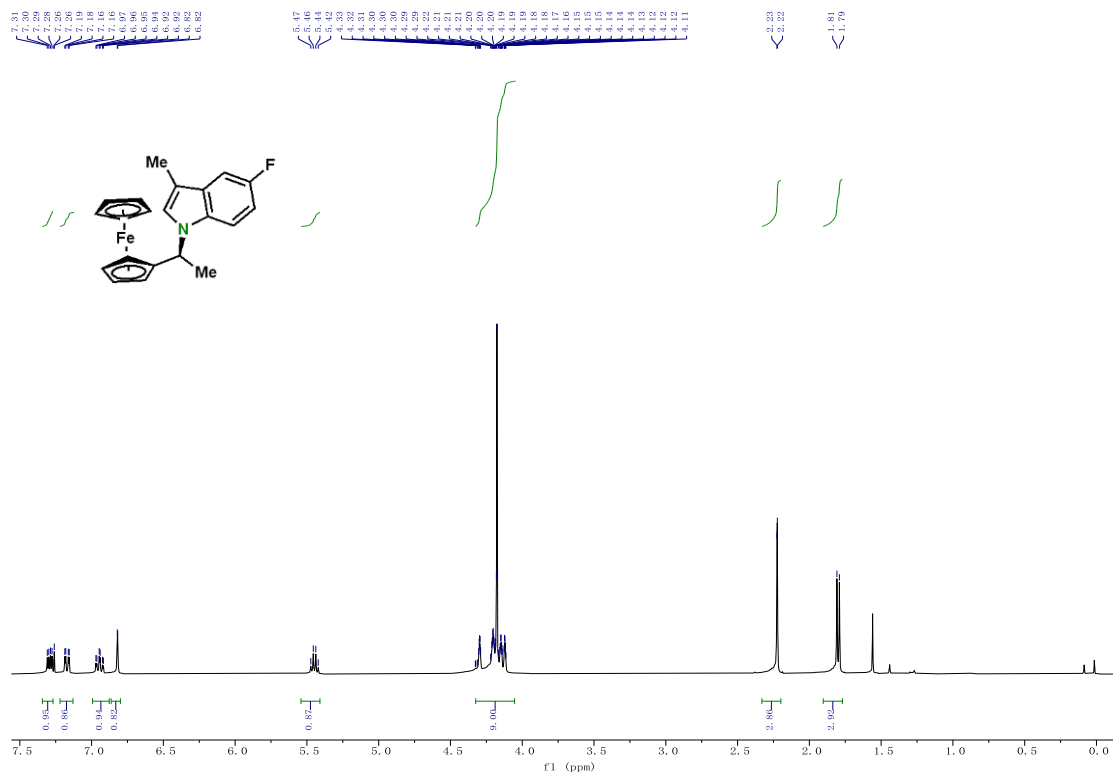

<sup>13</sup>C NMR (101 MHz, CDCl<sub>3</sub>)

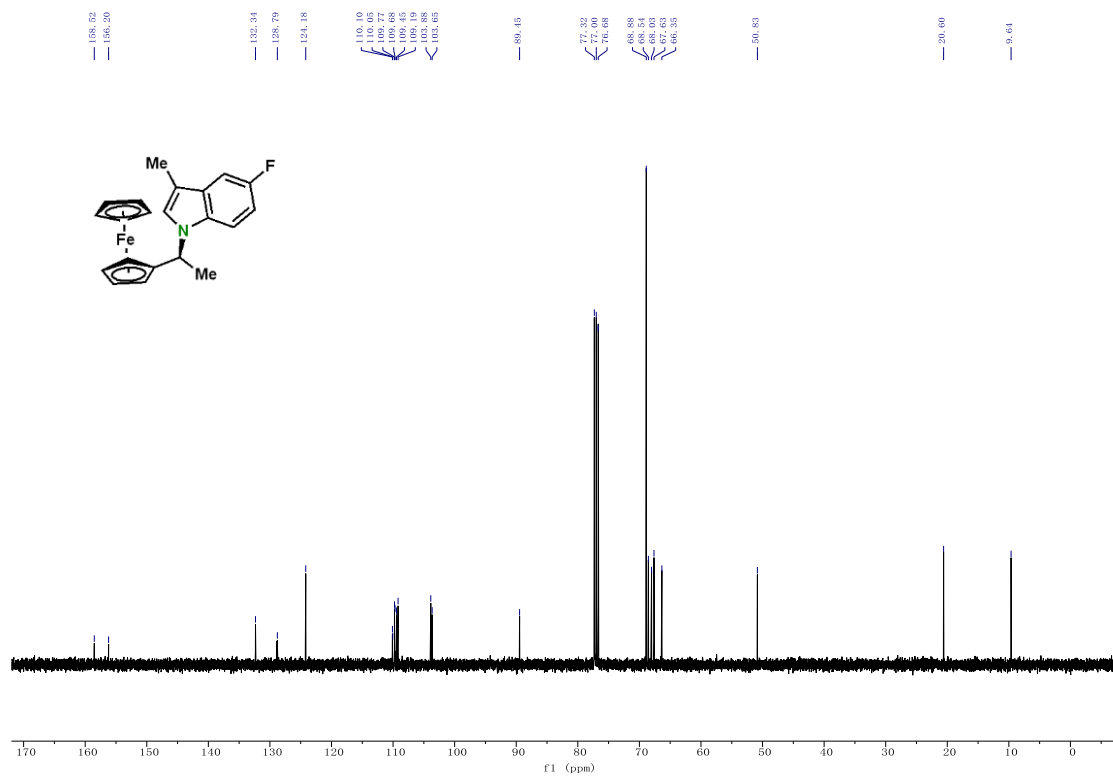

**<sup>19</sup>F NMR (376 MHz, CDCl<sub>3</sub>)**

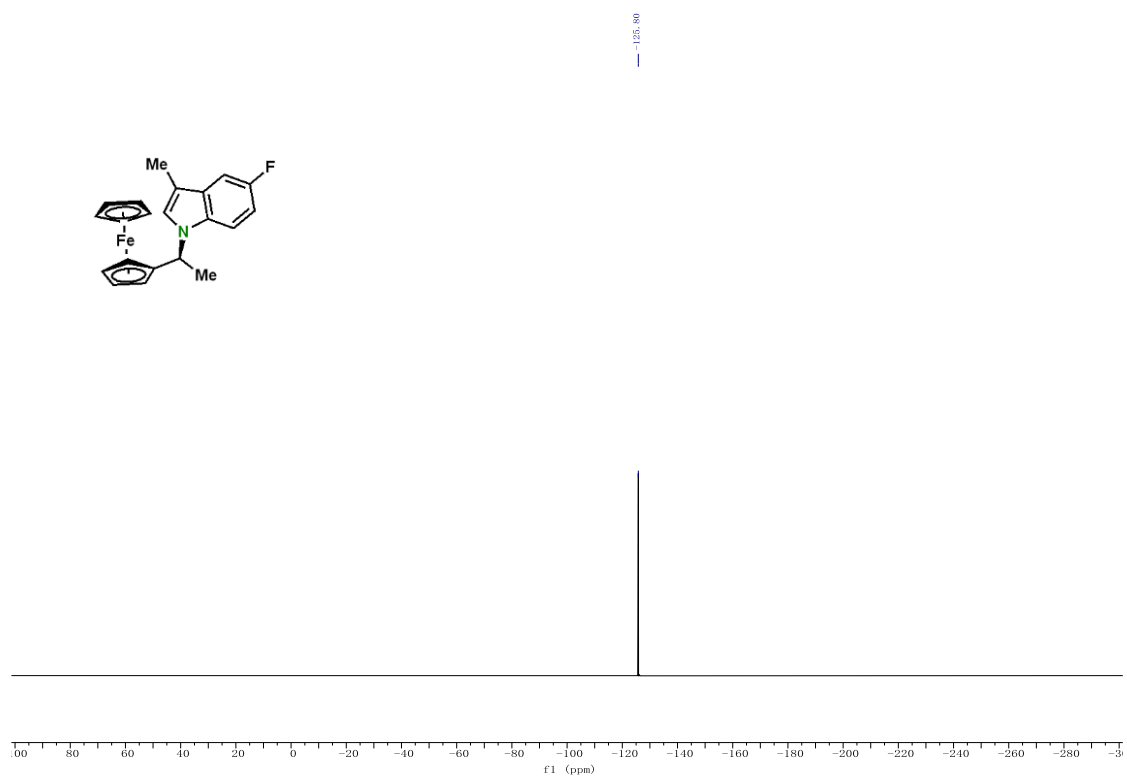

**(S)-5-chloro-3-methyl-1-(1-(ferrocene-2-yl)ethyl)-1H-indole (66)**

<sup>1</sup>H NMR (400 MHz, CDCl<sub>3</sub>)

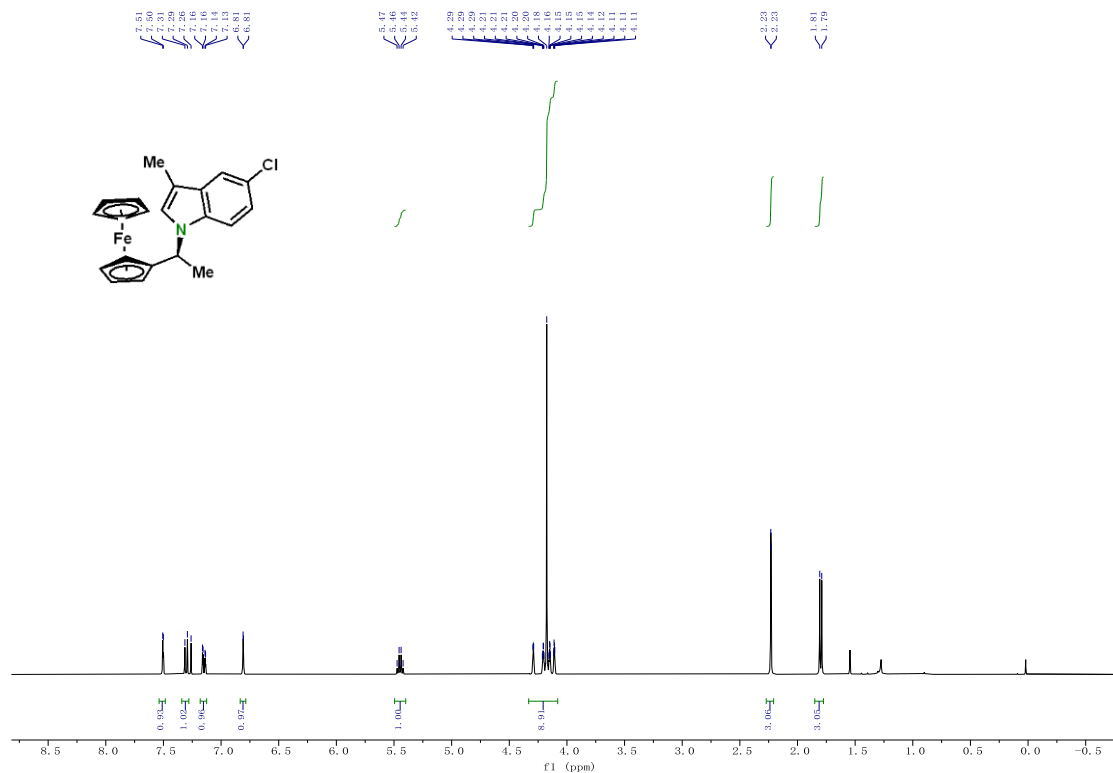

<sup>13</sup>C NMR (101 MHz, CDCl<sub>3</sub>)

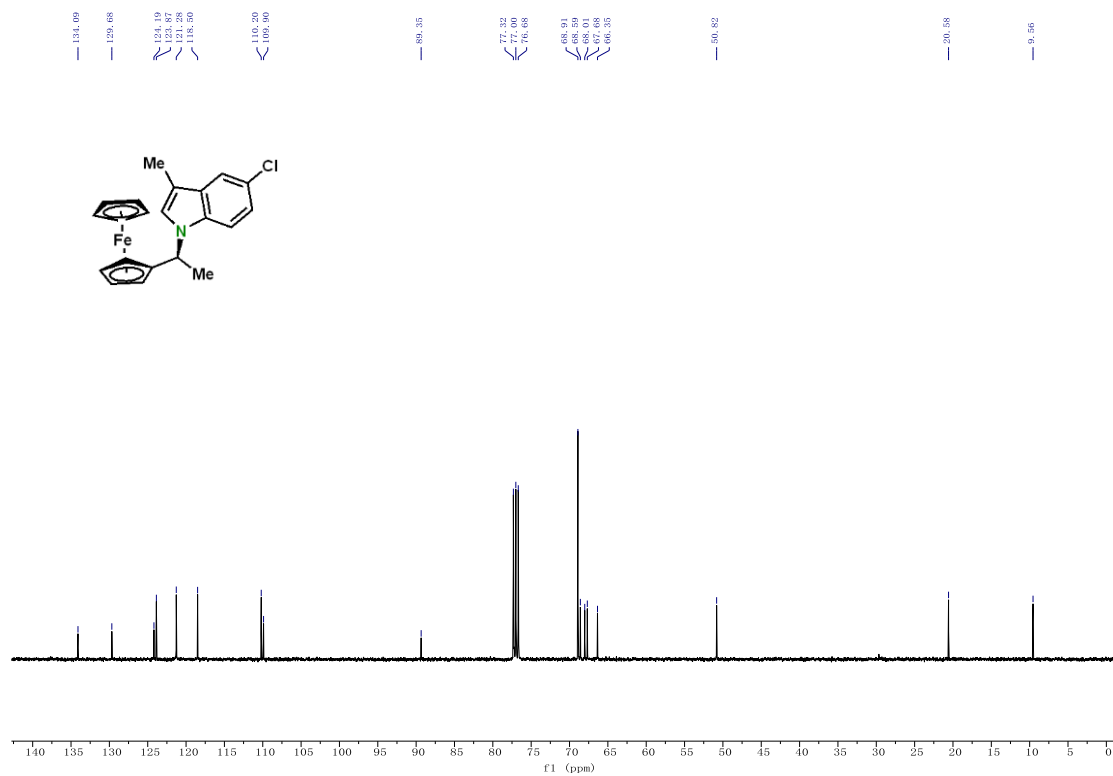

# methyl (S)-4-(1-(1-(ferrocene-2-yl)ethyl)-1H-indol-3-yl)butanoate (67)

<sup>1</sup>H NMR (400 MHz, CDCl<sub>3</sub>)

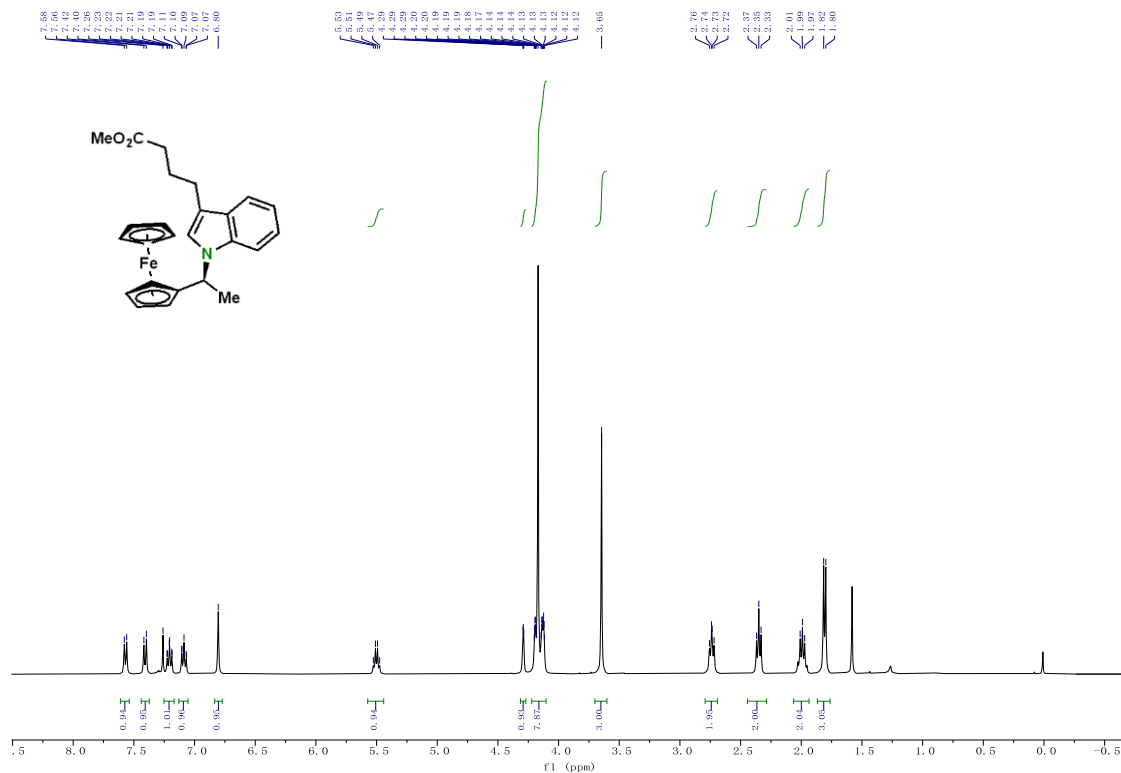

<sup>13</sup>C NMR (101 MHz, CDCl<sub>3</sub>)

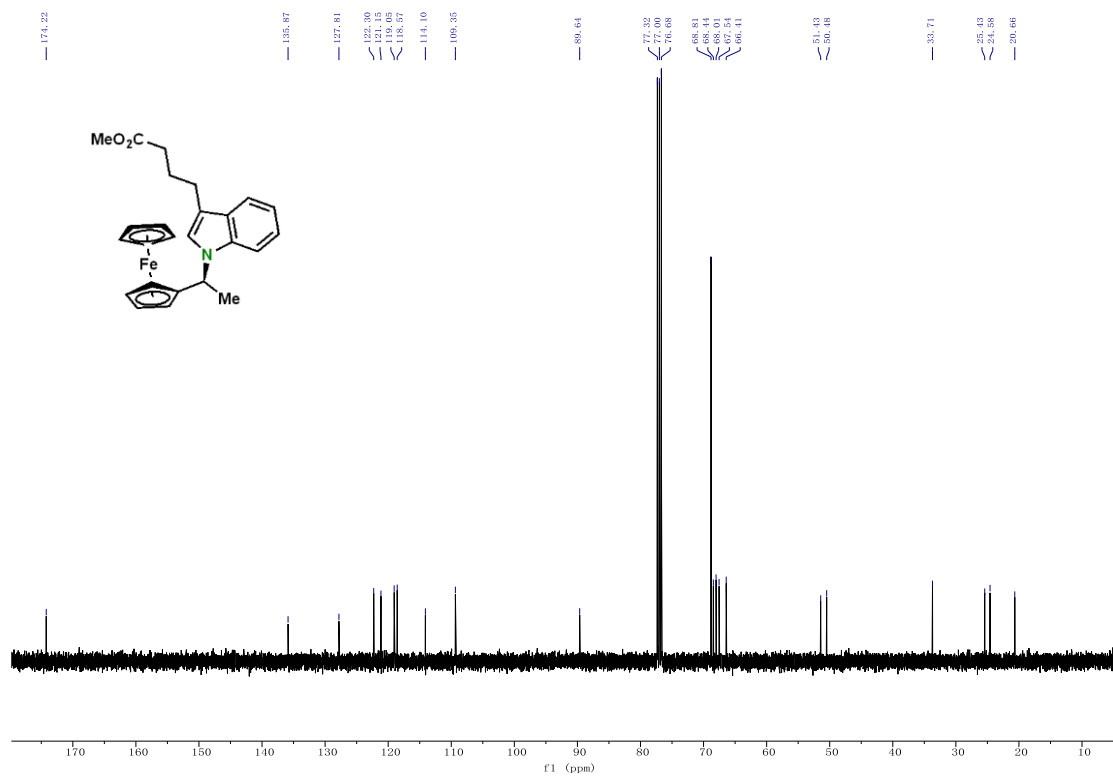

**(S)-2-(1-(1-(ferrocene-2-yl)ethyl)-1H-indol-3-yl)ethan-1-ol (68)**

<sup>1</sup>H NMR (400 MHz, CDCl<sub>3</sub>)

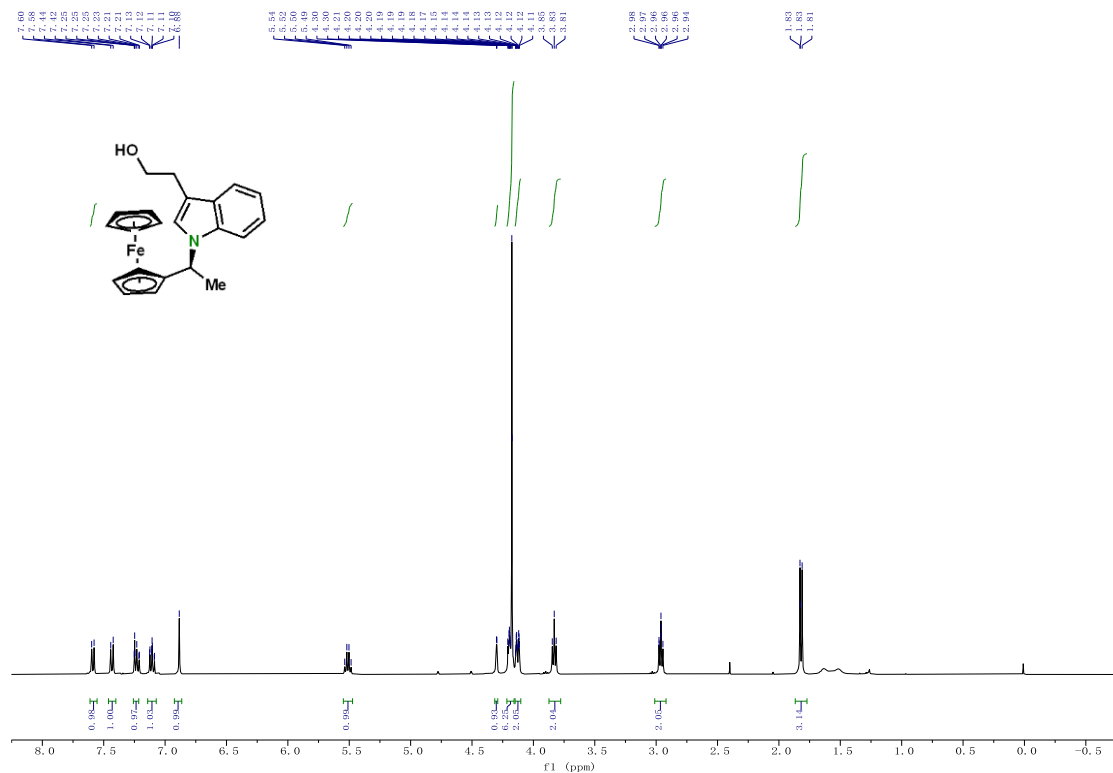

<sup>13</sup>C NMR (101 MHz, CDCl<sub>3</sub>)

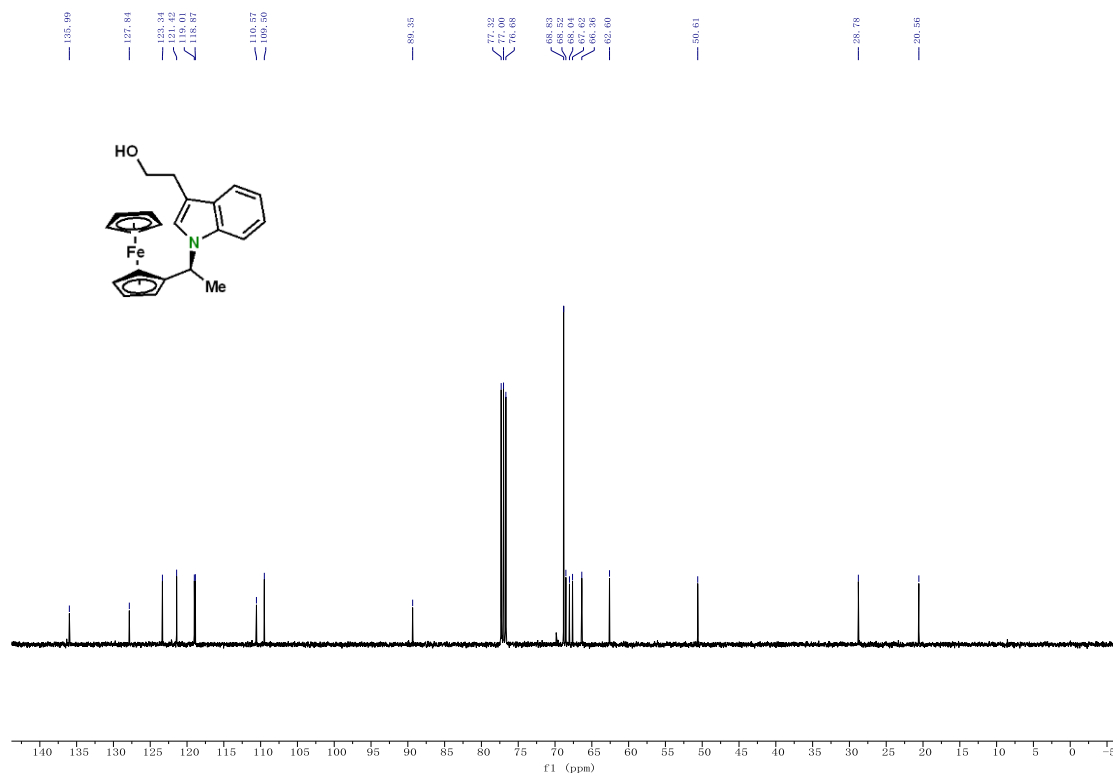

**methyl (R)-2-2-(((benzyloxy)carbonyl)amino)acetamido)-2-(1-((S)-1-(ferrocene-2-yl)ethyl)-1H-indol-3-yl)acetate (69)**

<sup>1</sup>H NMR (400 MHz, CDCl<sub>3</sub>)

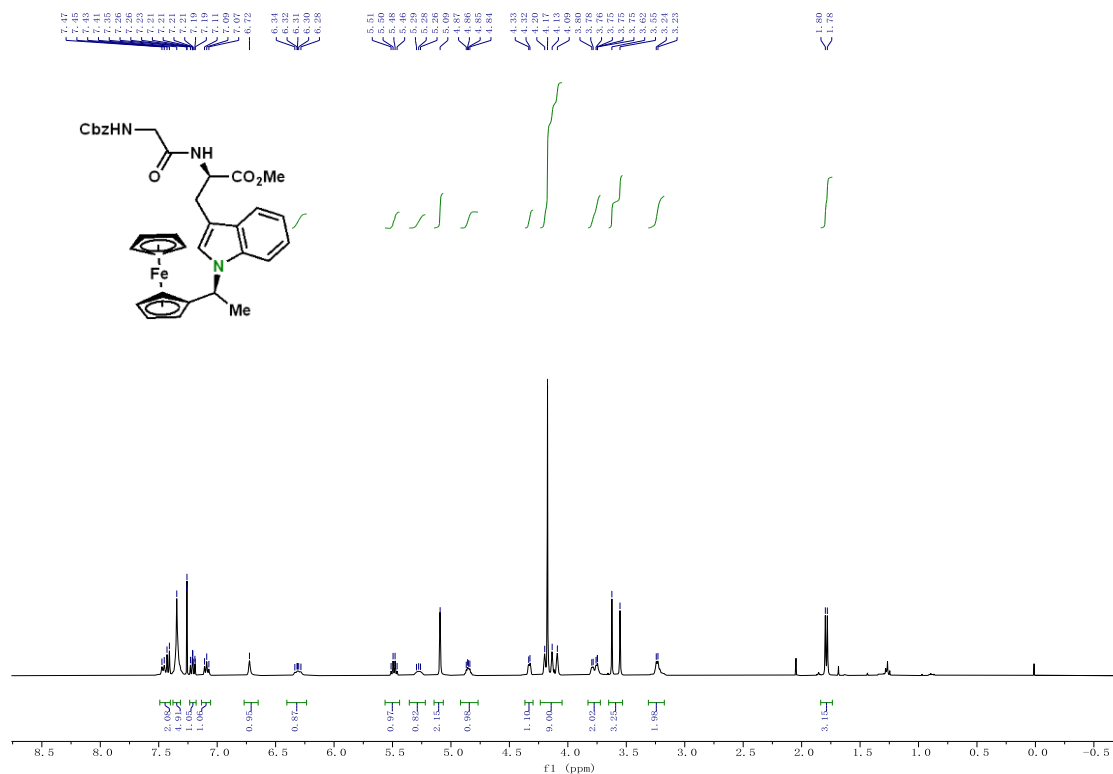

<sup>13</sup>C NMR (101 MHz, CDCl<sub>3</sub>)

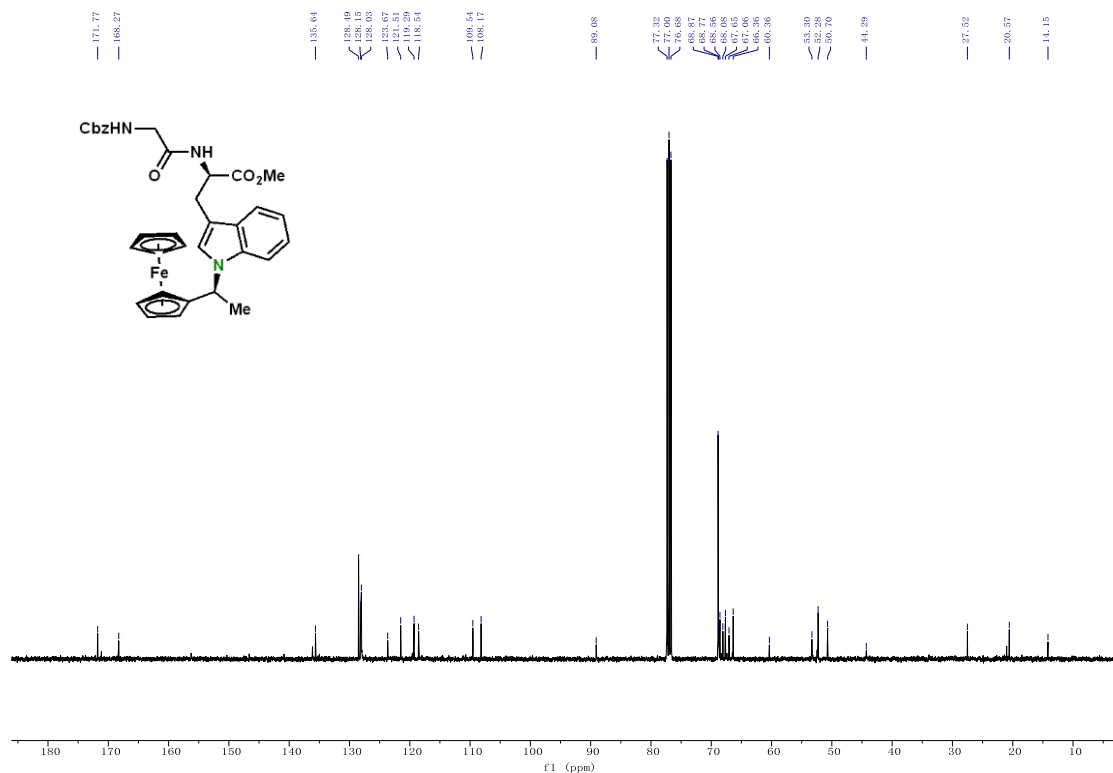

# (S)-N-(1-(ferrocene-2-yl)ethyl)benzamide (70)

<sup>1</sup>H NMR (400 MHz, CDCl<sub>3</sub>)

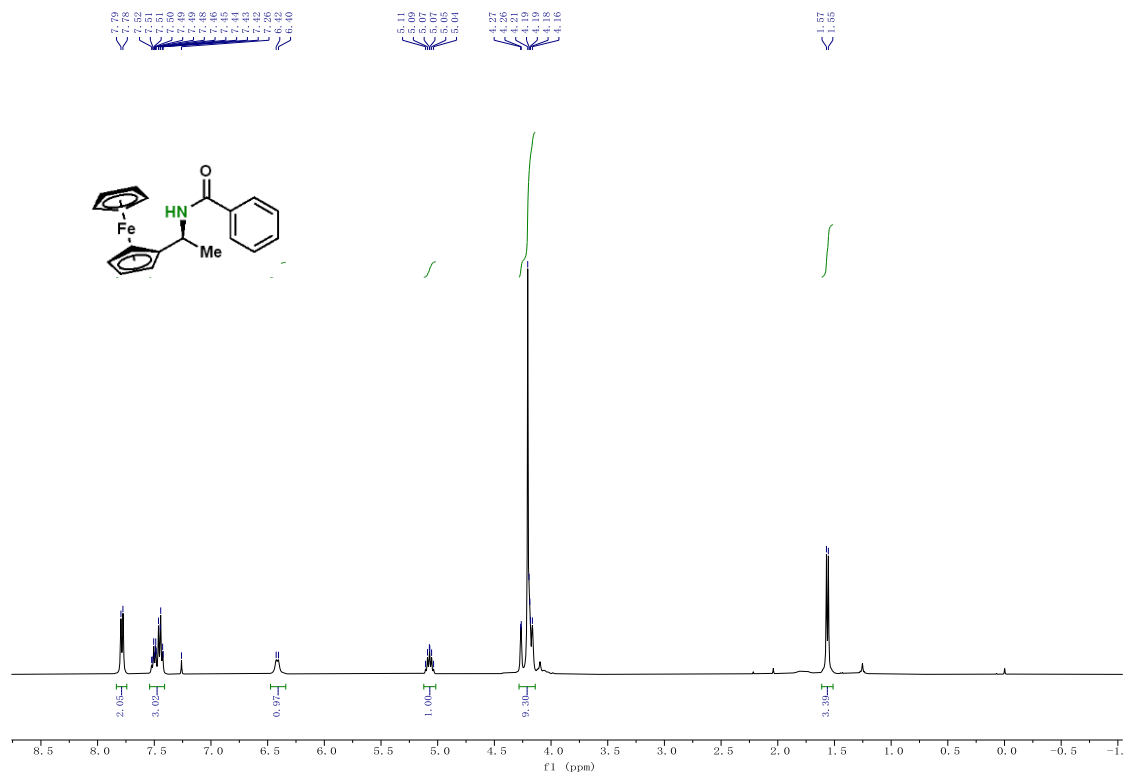

<sup>13</sup>C NMR (101 MHz, CDCl<sub>3</sub>)

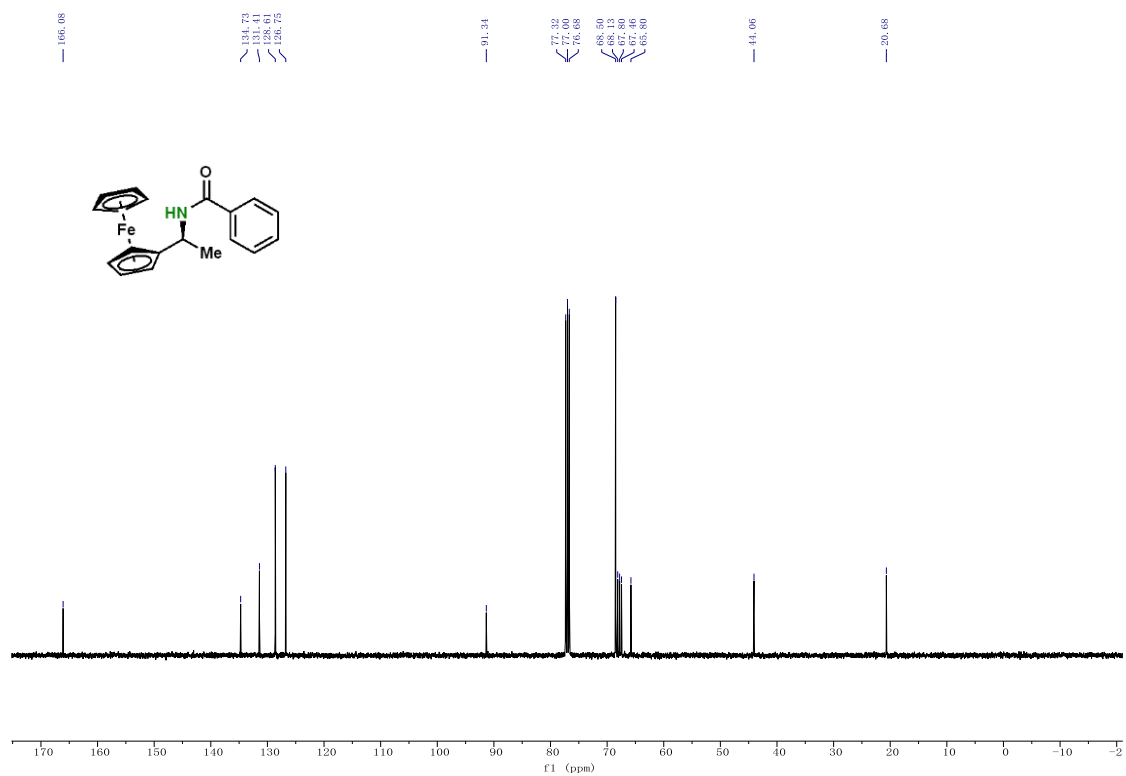

# (S)-N-(1-(ferrocene-2-yl)ethyl)cyclopropanecarboxamide (71)

$^1\text{H}$  NMR (400 MHz,  $\text{CDCl}_3$ )

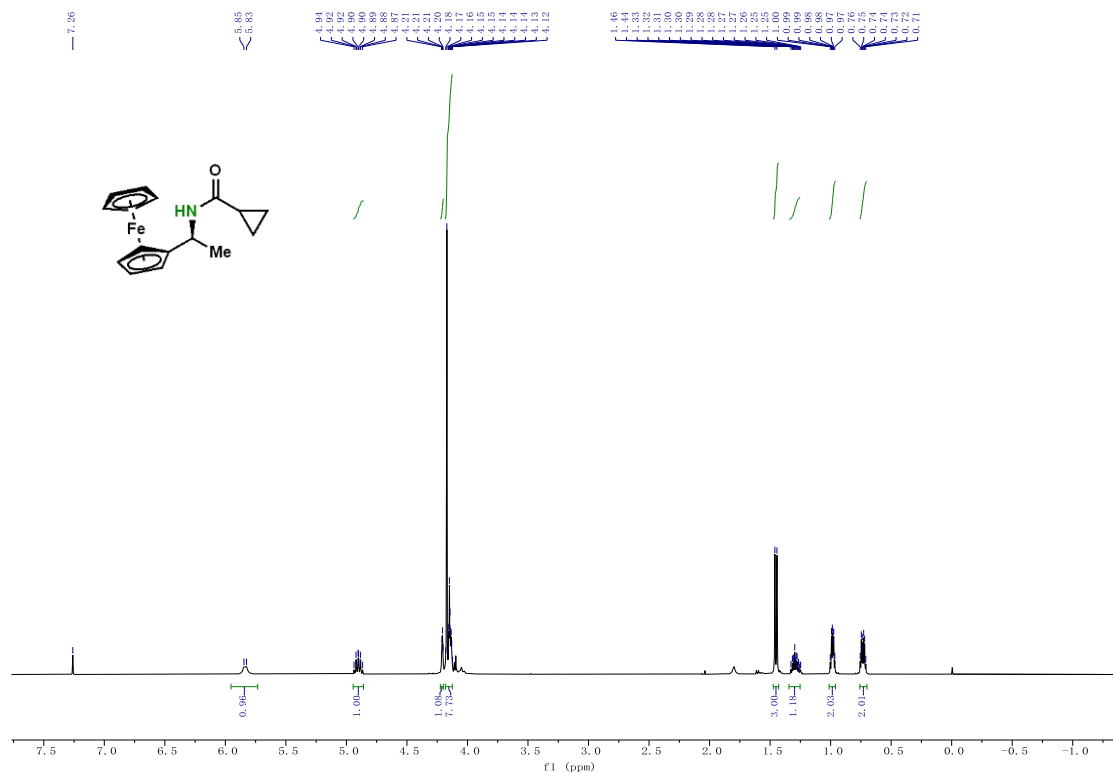

$^{13}\text{C}$  NMR (101 MHz,  $\text{CDCl}_3$ )

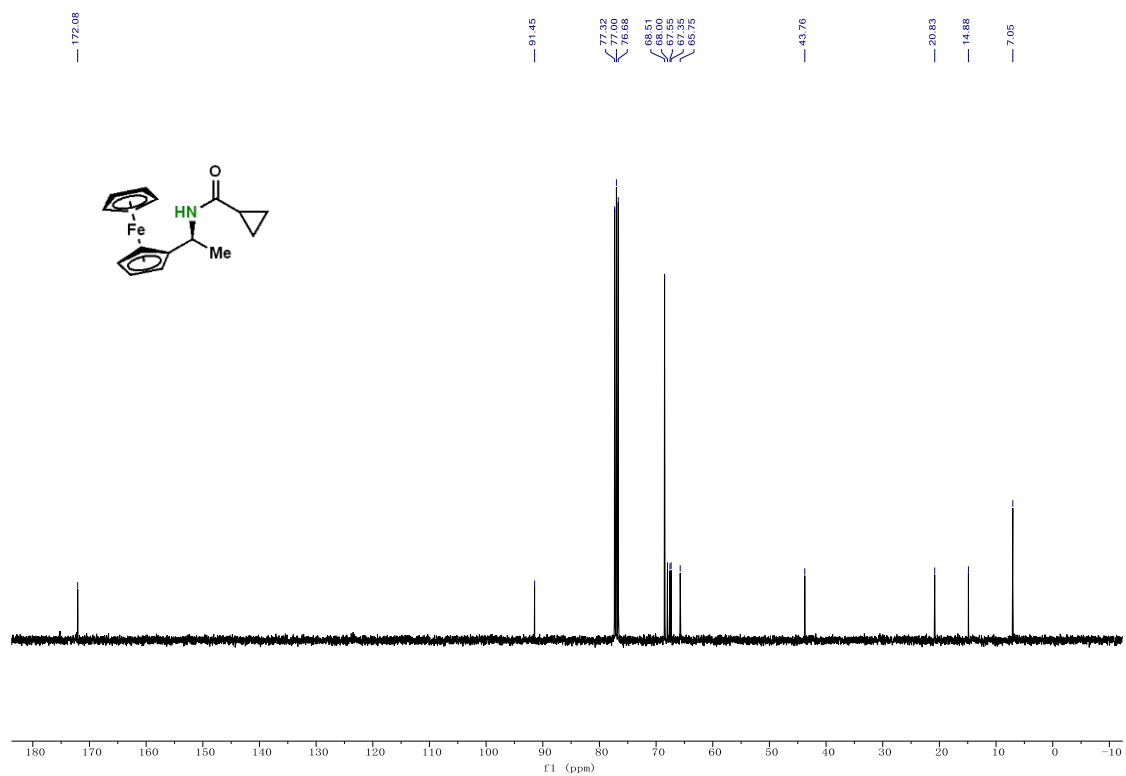

# benzyl N2-(tert-butoxycarbonyl)-N4-((S)-1-(ferrocene-2-yl)ethyl)-D-asparaginate

(72)

<sup>1</sup>H NMR (400 MHz, CDCl<sub>3</sub>)

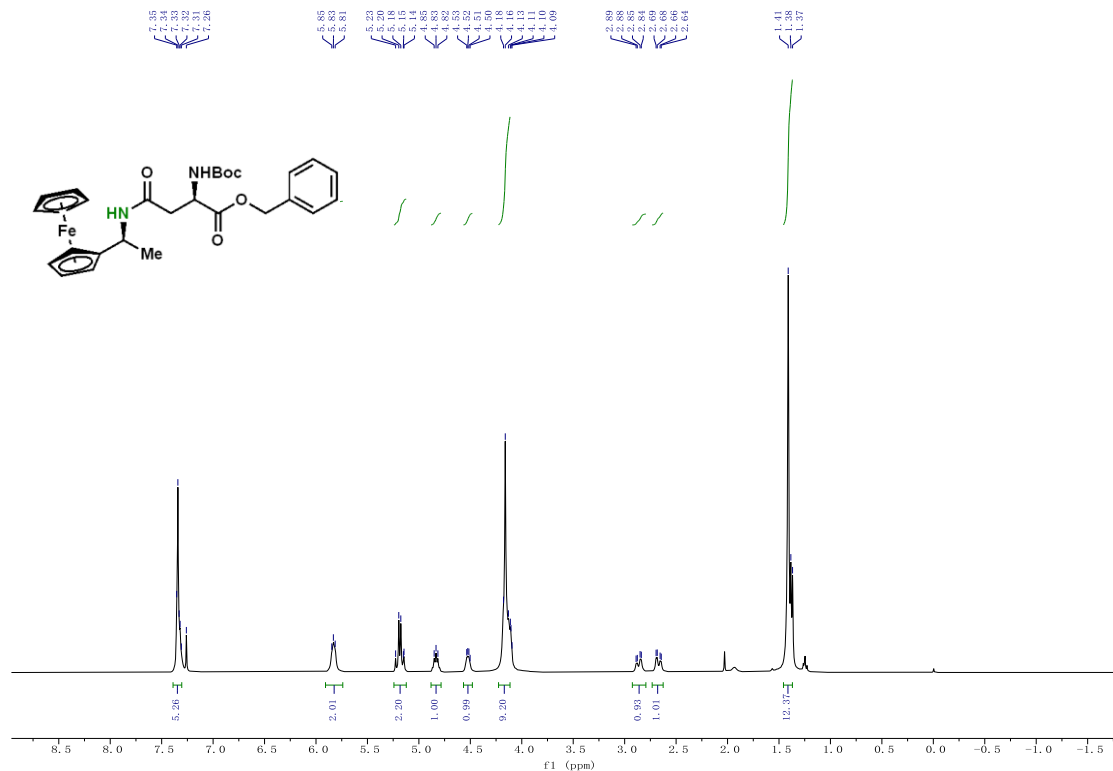

<sup>13</sup>C NMR (101 MHz, CDCl<sub>3</sub>)

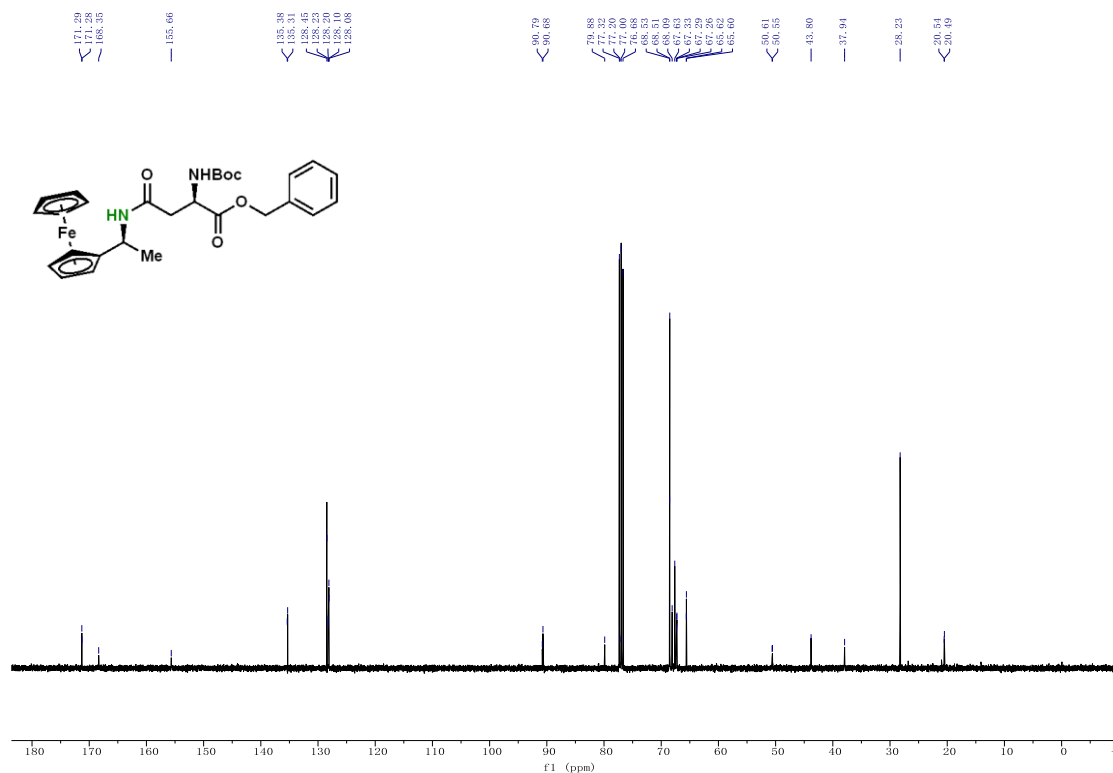

# (S)-N-phenyl-2-(1-(ferrocene-2-yl)ethyl)aniline (73)

$^1\text{H}$  NMR (400 MHz,  $\text{CDCl}_3$ )

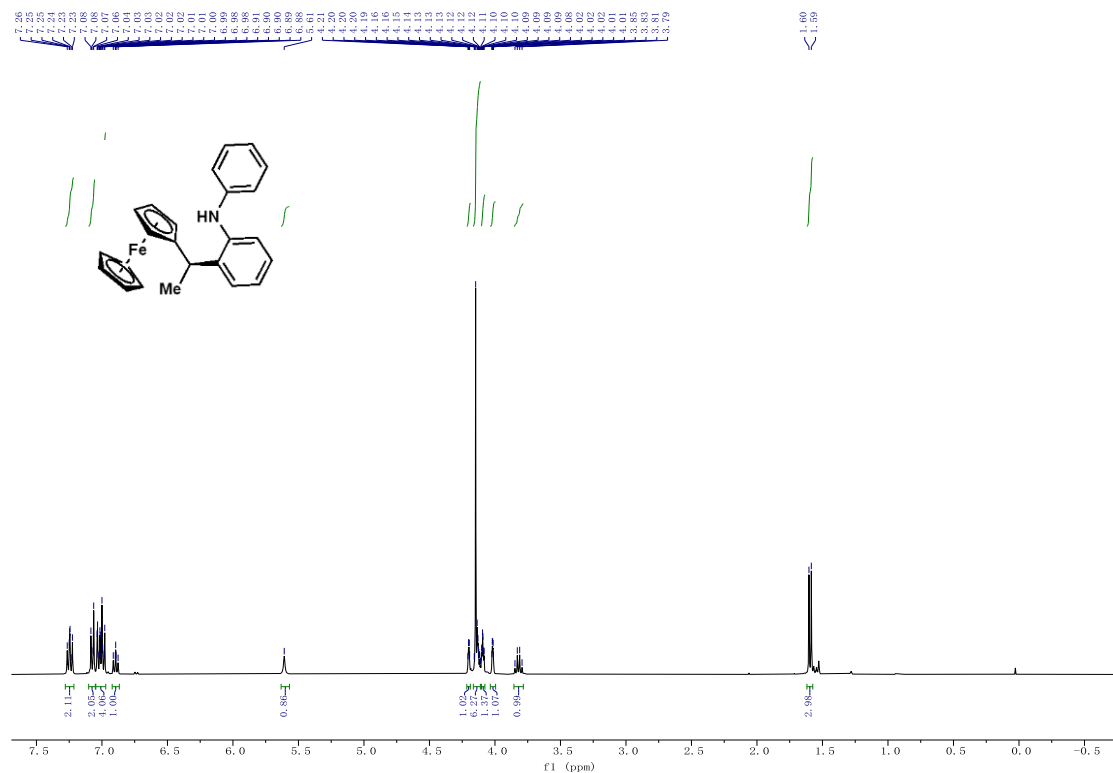

$^{13}\text{C}$  NMR (101 MHz,  $\text{CDCl}_3$ )

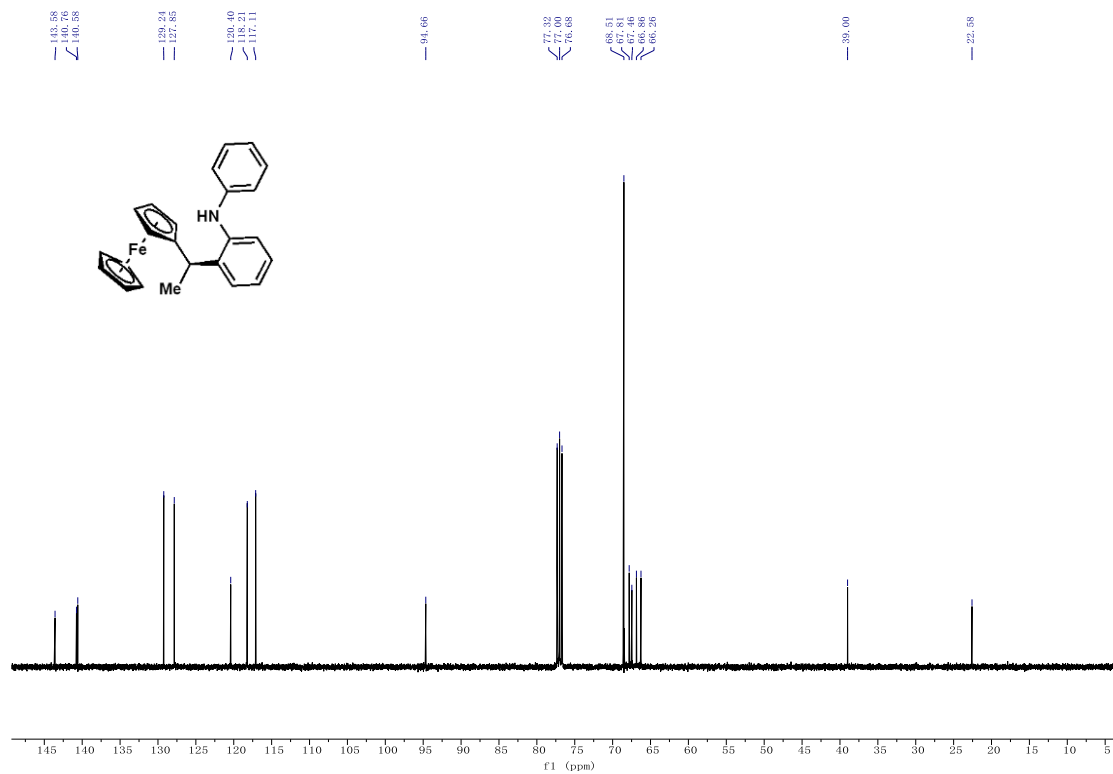



$^{31}\text{P}$  NMR (160 MHz,  $\text{CDCl}_3$ )

31.00

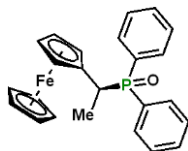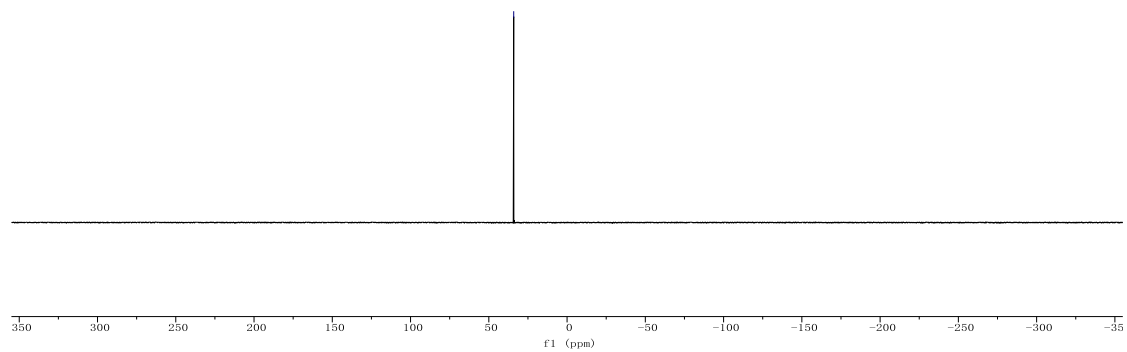

# (S)-bis(4-fluorophenyl)(1-(ferrocene-2-yl)ethyl)phosphine oxide (75)

$^1\text{H}$  NMR (400 MHz,  $\text{CDCl}_3$ )

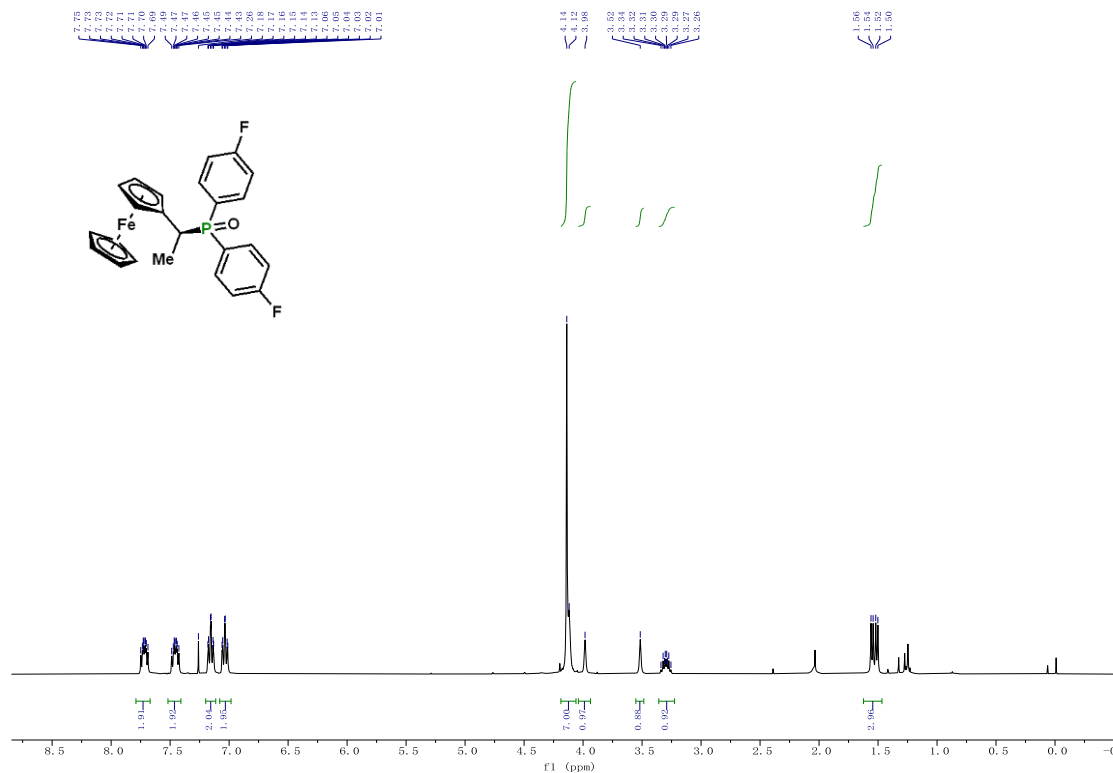

$^{13}\text{C}$  NMR (101 MHz,  $\text{CDCl}_3$ )

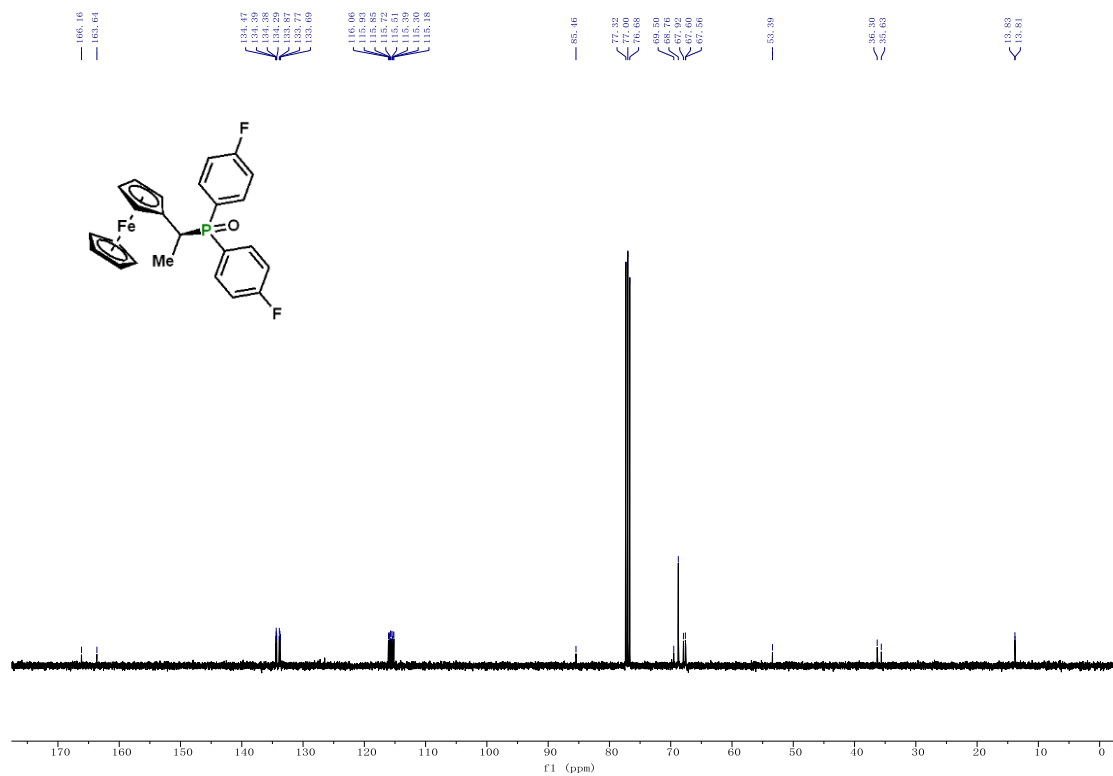

**<sup>19</sup>F NMR (376 MHz, CDCl<sub>3</sub>)**

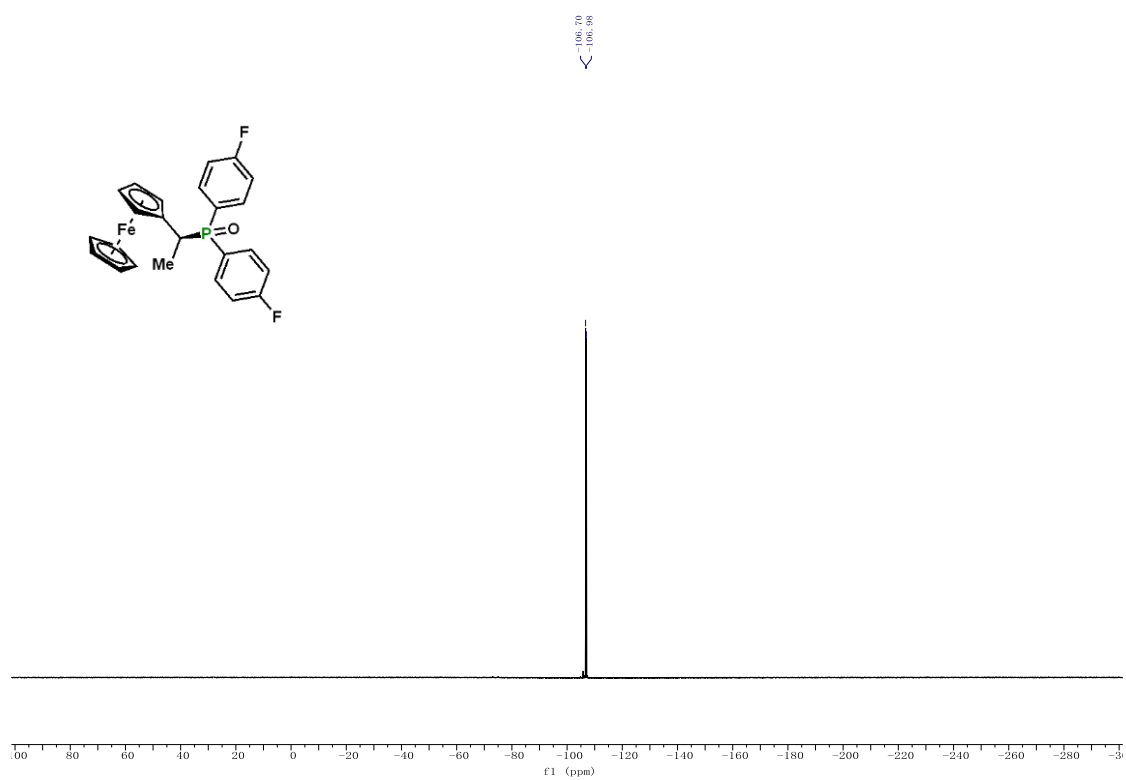

**<sup>31</sup>P NMR (160 MHz, CDCl<sub>3</sub>)**

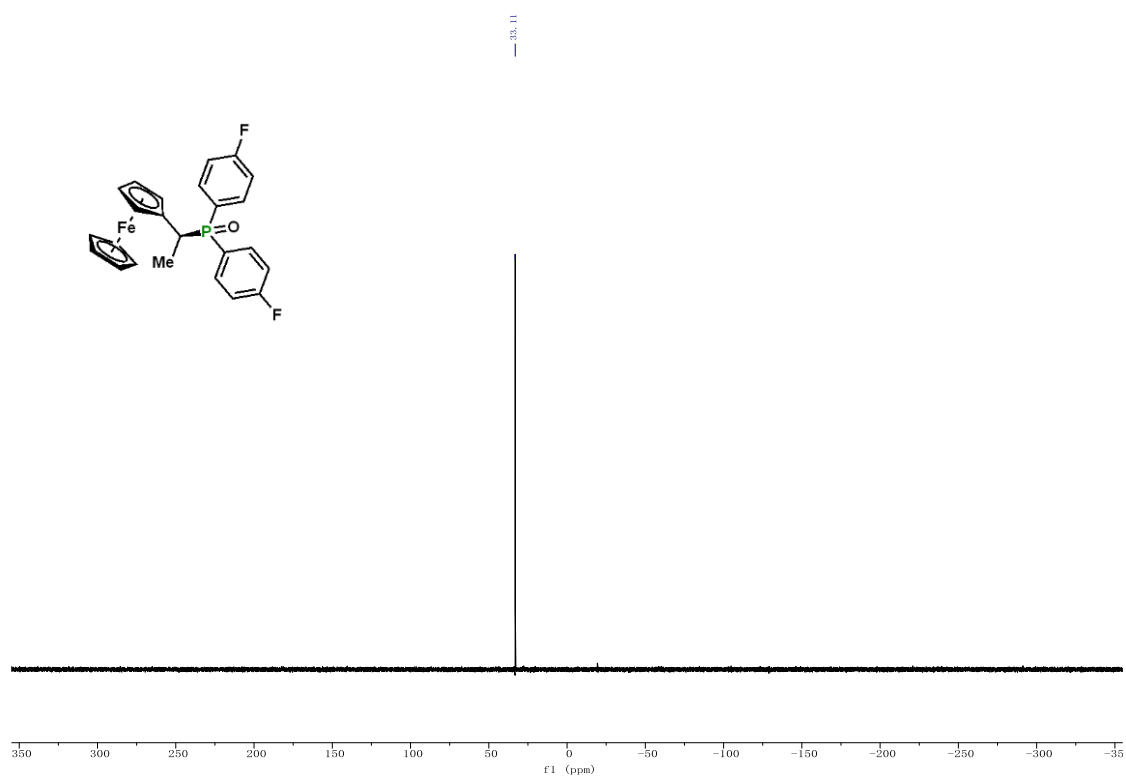

# (S)-di(naphthalen-2-yl)(1-(ferrocene-2-yl)ethyl)phosphine oxide (76)

$^1\text{H}$  NMR (400 MHz,  $\text{CDCl}_3$ )

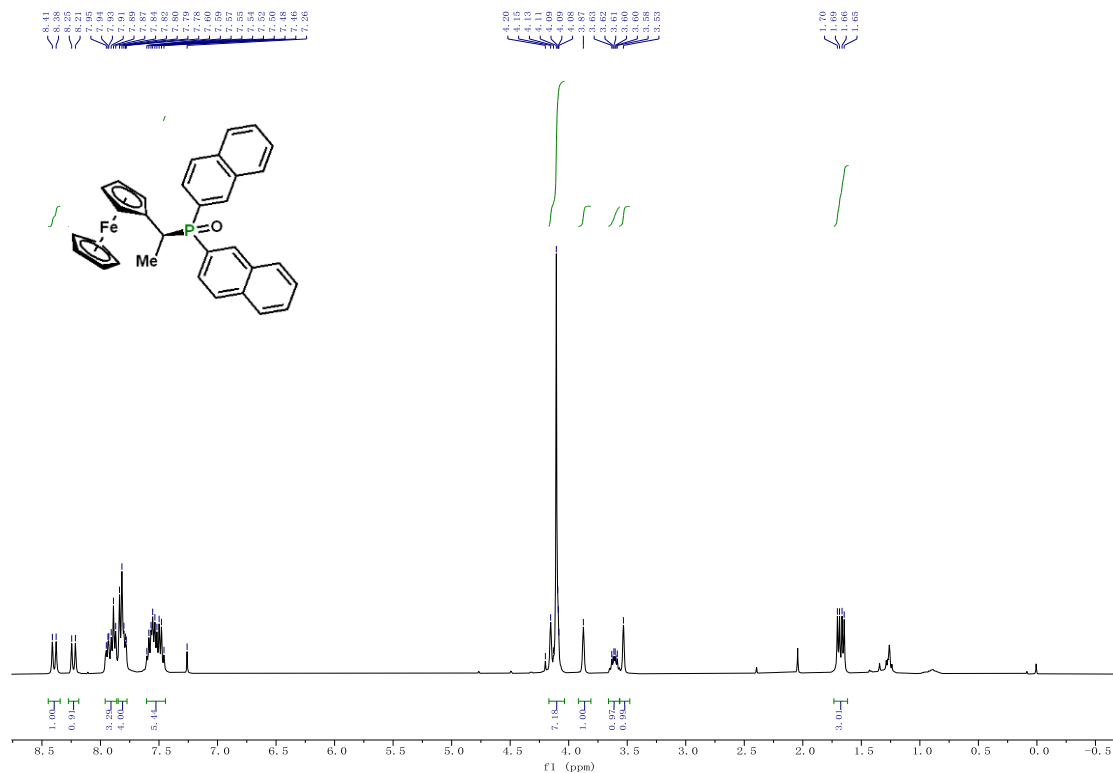

$^{13}\text{C}$  NMR (101 MHz,  $\text{CDCl}_3$ )

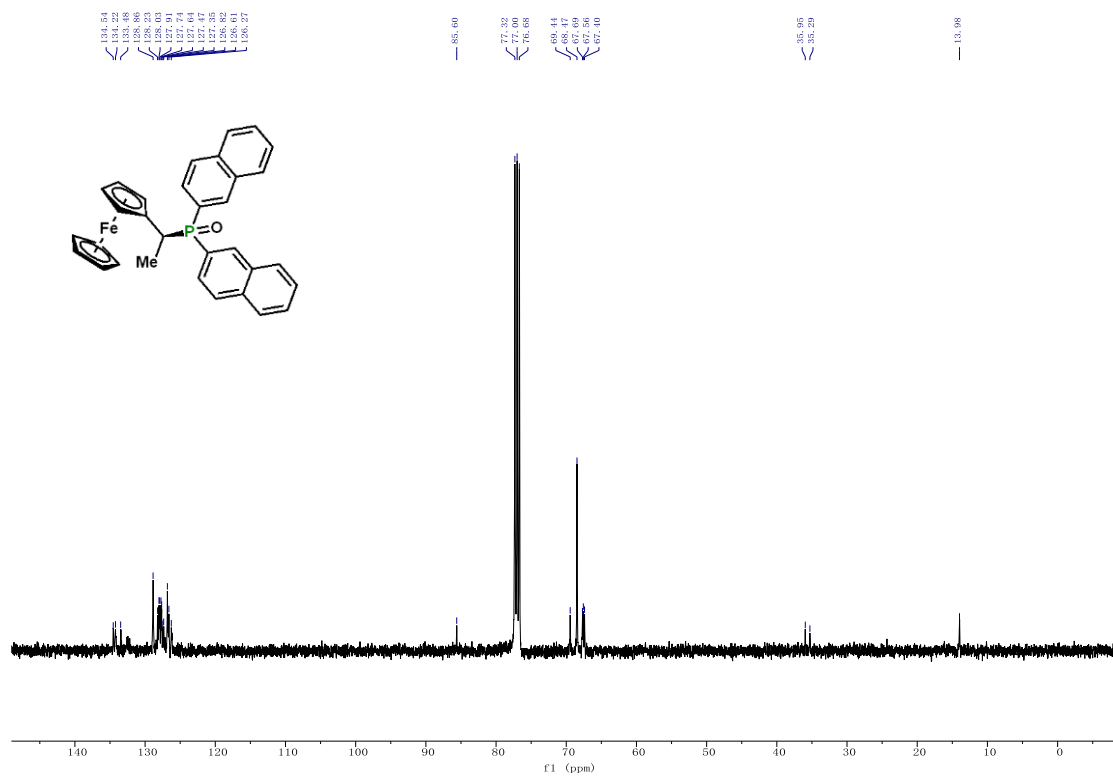

$^{31}\text{P}$  NMR (160 MHz,  $\text{CDCl}_3$ )

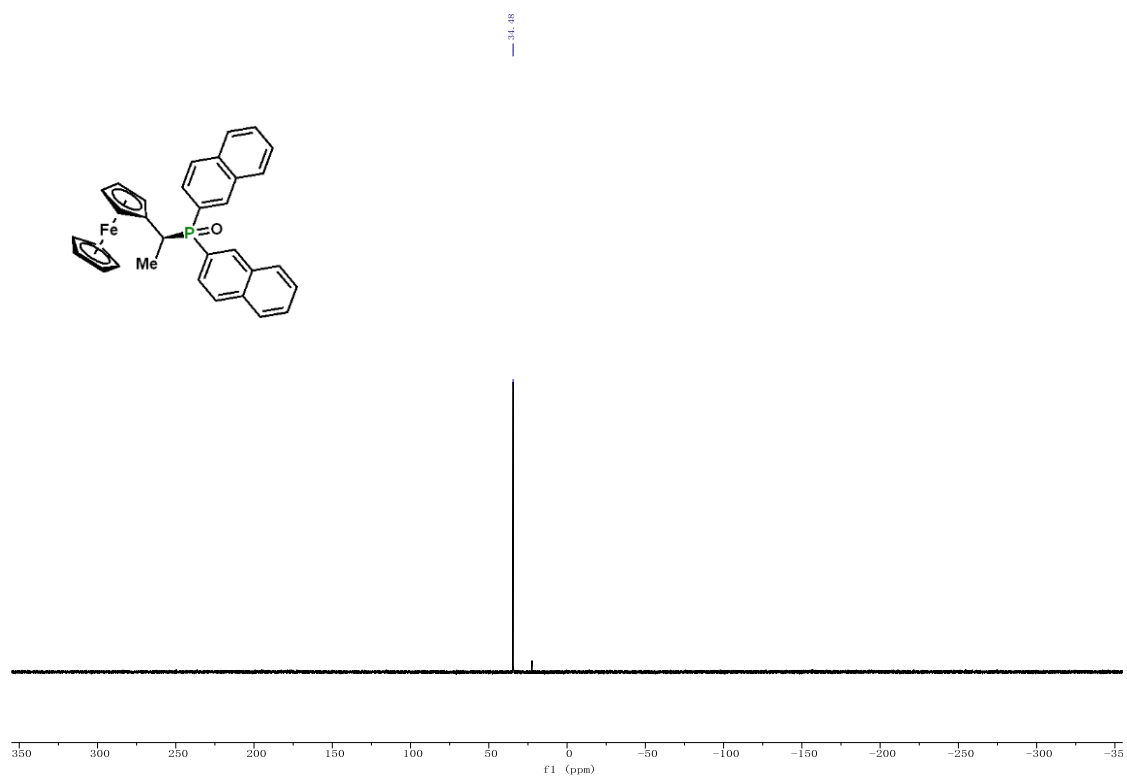

## 10. References

- (1) B. J. Ueberbacher, H. Griengl, H. Weber, Ortho-lithiation of free ferrocenyl alcohols: a new method for the synthesis of planar chiral ferrocene derivatives. *Chem. Commun.* **28**, 3287–3289 (2008).
- (2) Y. Zhu, C. Yang, Q. Lin, J. Li, T.-P. Loh, P. Chen, Z. Jia, Rapid C–S Coupling in Water via Ion-Pair-Catalyzed Dehydration. *Org. Lett.* **27**, 2110–2115 (2025).
- (3) S. Zhang, W. Gu, F. Yang, L. Ma, Z. Shi, X. Li, Z. Zhao, A Route to the Mild Synthesis of  $\alpha$ -Selenomethylketones via Vinyl Azides. *J. Org. Chem.* **90**, 4897–4908 (2025).
- (4) G. L. Tolnai, J. P. Brand, J. Waser, Gold-catalyzed direct alkynylation of tryptophan in peptides using TIPS-EBX. *Beilstein J. Org. Chem.* **12**, 745–749 (2016).
- (5) C. Nottingham, R. Benson, H. Müller-Bunz, P. J. Guiry, Synthesis of Ferrocene Oxazoline N,O Ligands and Their Application in Asymmetric Ethyl- and Phenylzinc Additions to Aldehydes. *J. Org. Chem.* **80**, 10163–10176 (2015).
- (6) M. J. Frisch, G. W. Trucks, H. B. Schlegel, G. E. Scuseria, M. A. Robb, J. R. Cheeseman, G. Scalmani, V. Barone, B. Mennucci, G. A. Petersson, et al. Gaussian 16, Revision A.03, Gaussian, Inc., Wallingford, CT (2016).
- (7) CYLview20; Legault, C. Y. Université de Sherbrooke, 2020, (<http://www.cylview.org>).
- (8) J. P. Perdew, Y. Wang, Accurate and Simple Analytic Representation of the Electron-Gas Correlation Energy. *Phys. Rev. B: Condens. Matter Mater. Phys.* **45**, 13244–13249 (1992).
- (9) J. P. Perdew, J. A. Chevary, S. H. Vosko, K. A. Jackson, M. R. Pederson, D. J. Singh, C. Fiolhais, Atoms, Molecules, Solids, and Surfaces: Applications of The Generalized Gradient Approximation for Exchange and Correlation. *Phys. Rev. B: Condens. Matter Mater. Phys.* **46**, 6671–6687 (1992).
- (10) G. A. Petersson, A. Bennett, T. G. Tensfeldt, M. A. Allaham, W. A. Shirley, J. Mantzaris, A Complete Basis Set Model Chemistry. I. The Total Energies of Closed-Shell Atoms and Hydrides of the First-Row Elements. *J. Chem. Phys.* **89**, 2193–2218 (1988).
- (11) M. Dolg, U. Wedig, H. Stoll, H. Preuss, Energy-adjusted ab initio pseudopotentials for the first row transition elements. *J. Chem. Phys.* **86**, 866–872 (1987).
- (12) J. M. L. Martin, A. Sundermann, Correlation consistent valence basis sets for use with the Stuttgart-Dresden-Bonn relativistic effective core potentials: The atoms Ga-Kr and In-Xe. *J. Chem. Phys.* **114**, 3408–3420 (2001).
- (13) S. Grimme, S. Ehrlich, L. Goerigk, Effect of the Damping Function in Dispersion Corrected Density Functional Theory. *J. Comput. Chem.* **32**, 1456–1465 (2011).

- (14) A. V. Marenich, C. J. Cramer, D. G. Truhlar, Universal Solvation Model Based on Solute Electron Density and on a Continuum Model of the Solvent Defined by the Bulk Dielectric Constant and Atomic Surface Tensions. *J. Phys. Chem. B.* **113**, 6378–6396 (2009).
- (15) K. Fukui, The path of chemical reactions - the IRC approach. *Acc. Chem. Res.* *14*, 363–368 (1981).
- (16) S. Grimme, J. Antony, S. Ehrlich, H. Krieg, A Consistent and Accurate ab Initio Parametrization of Density Functional Dispersion Correction (DFT-D) for the 94 Elements H-Pu. *J. Chem. Phys.* **132**, 154104–154123 (2010).
- (17) M. J. Frisch, J. A. Pople, J. S. Binkley, Self-Consistent Molecular Orbital Methods 25. Supplementary Functions for Gaussian Basis Sets. *J. Chem. Phys.* **80**, 3265–3269 (1984).
